# Supplementary material for: Four types of adenine-related RNA modification writers -mediated molecular subtypes contribute to predicting clinical outcomes and treatment options in bladder cancer
Source: Front Immunol. 2023 Aug 11;14:1152806. doi: 10.3389/fimmu.2023.1152806 (PMC10450768; doi:10.3389/fimmu.2023.1152806)
Supplement: Supplementary Table 4 — A-H: (A) 1525 RNA modification-related DEGs between clusterA and cluster; (B) GO analysis of 1525 RNA modification-related DEGs; (C) KEGG analysis of 1525 RNA modification-related DEGs; (D) 355 DEGs with significant prognostic value; (E) The coefficients of genes in the Writer-Score scoring system; (F) The differences in hallmark pathways between high- and low- Writer-Score groups; (G) The differences in oncogenic pathways between high- and low- Writer-Score groups; (H) The differences in KEGG pathways between high- and low- Writer-Score groups. DEGs, differentially expressed genes; GO, Gene Ontology; KEGG, Kyoto Encyclopedia of Genes and Genomes. [file Table_4.xlsx]

## Sheet: A
1525 RNA modification-related DEGs between clusterA and clusterB
id	logFC	AveExpr	t	P.Value	adj.P.Val	B
ADAR	-111.259	134.918	-21.384	1.59702e-68	3.12776e-64	144.942
XPO1	-29.2648	54.7151	-15.5559	3.8228e-43	3.74348e-39	87.2533
HCFC1	-24.9955	42.4987	-15.0188	7.17975e-41	3.51539e-37	82.082
BAZ1B	-31.1806	55.679	-14.9249	1.78468e-40	6.99058e-37	81.1826
SNRNP200	-44.7829	78.5403	-14.5885	4.58732e-39	1.12303e-35	77.9759
THRAP3	-42.8471	98.7184	-14.3496	4.53926e-38	8.08194e-35	75.7121
SMC1A	-25.5462	33.7962	-14.3	7.29443e-38	1.08355e-34	75.2436
DHX9	-57.7206	111.698	-14.2937	7.74556e-38	1.08355e-34	75.1843
HNRNPU	-67.8473	162.263	-14.1689	2.55091e-37	3.12247e-34	74.0072
USP1	-36.4704	41.9999	-13.9946	1.33863e-36	1.54218e-33	72.37
HNRNPK	-134.982	352.233	-13.9836	1.4856e-36	1.61641e-33	72.2671
DTX3L	-42.4722	55.8906	-13.785	9.73364e-36	9.07778e-33	70.4107
ECT2	-24.5993	30.2385	-13.677	2.69485e-35	1.95476e-32	69.4051
NUP205	-21.2196	30.9179	-13.4866	1.61162e-34	9.86359e-32	67.6391
NUP153	-29.2049	35.7031	-13.3959	3.76644e-34	1.9412e-31	66.8009
MCM6	-41.0115	55.9258	-13.3361	6.57942e-34	2.9967e-31	66.2501
PAK2	-29.8804	64.8485	-13.305	8.79662e-34	3.66557e-31	65.9634
HNRNPR	-29.9936	61.0005	-13.2578	1.36463e-33	5.34527e-31	65.5298
CKAP5	-32.3015	48.2198	-13.1361	4.22649e-33	1.56181e-30	64.4137
TPM3	-84.5594	159.149	-12.9805	1.78478e-32	6.0267e-30	62.9915
DEK	-127.39	135.159	-12.962	2.11679e-32	6.76501e-30	62.8231
UBAP2L	-34.3002	73.0017	-12.9429	2.52369e-32	7.84546e-30	62.6495
SUPT16H	-40.2052	65.0226	-12.8832	4.37451e-32	1.27873e-29	62.1065
HUWE1	-27.9873	51.6449	-12.6634	3.28119e-31	7.83685e-29	60.1175
GANAB	-150.156	301.914	-12.6477	3.78885e-31	8.83388e-29	59.9755
DIAPH1	-43.1052	74.8877	-12.5844	6.75117e-31	1.48156e-28	59.4053
RACGAP1	-28.0388	38.5102	-12.5834	6.80831e-31	1.48156e-28	59.397
XRN2	-52.8562	96.8644	-12.5814	6.93718e-31	1.49302e-28	59.3785
ZFP91	-21.6886	44.6326	-12.4908	1.58205e-30	3.0082e-28	58.5648
DDX23	-30.5249	79.0761	-12.4826	1.70322e-30	3.14694e-28	58.4919
ATAD2	-23.7555	29.0808	-12.4783	1.77149e-30	3.24249e-28	58.4532
CEBPZ	-21.5424	45.8435	-12.4746	1.83141e-30	3.32113e-28	58.4203
DNMT1	-26.9089	35.2937	-12.4442	2.41301e-30	4.29625e-28	58.1481
KPNB1	-57.4549	118.644	-12.4279	2.79841e-30	4.93756e-28	58.0019
NUP62	-26.9056	56.6288	-12.3471	5.815e-30	9.99007e-28	57.2801
SF1	-41.3507	120.822	-12.2673	1.19482e-29	1.88715e-27	56.5694
NRAS	-32.2463	54.596	-12.2169	1.87983e-29	2.81042e-27	56.1222
FUBP1	-22.4129	49.3693	-12.1205	4.46721e-29	6.03381e-27	55.2681
SNW1	-34.918	89.7553	-12.1143	4.72604e-29	6.33969e-27	55.2125
NMT1	-23.0877	62.894	-12.105	5.13619e-29	6.79678e-27	55.1304
PRRC2B	-23.0308	26.8246	-12.1041	5.17403e-29	6.8009e-27	55.1231
DCAF12	-26.568	48.2505	-12.0925	5.74402e-29	7.45011e-27	55.02
ACTR2	-97.7031	214.477	-12.0584	7.79119e-29	9.78143e-27	54.7192
TOP1	-47.4618	96.6302	-12.0408	9.11956e-29	1.11533e-26	54.5639
PRRC2A	-55.2518	113.3	-12.002	1.28978e-28	1.5126e-26	54.2219
IPO5	-30.3938	51.7521	-11.9472	2.10133e-28	2.3927e-26	53.7403
CPSF7	-20.5027	51.1906	-11.9454	2.13524e-28	2.41726e-26	53.7245
UBQLN1	-26.2232	54.7525	-11.9376	2.2898e-28	2.57734e-26	53.6555
SNX6	-26.7545	51.9685	-11.9275	2.50335e-28	2.75439e-26	53.5676
PSME3	-35.548	88.4649	-11.8739	4.03304e-28	4.29278e-26	53.0971
TSN	-25.393	58.5421	-11.8726	4.0796e-28	4.31886e-26	53.0858
EIF4G1	-93.8263	205.585	-11.832	5.84794e-28	5.87344e-26	52.7305
DLGAP5	-20.9196	25.0652	-11.8242	6.26351e-28	6.1955e-26	52.6628
DCTN1	-21.1423	43.7003	-11.7697	1.01455e-27	9.6456e-26	52.187
EIF4H	-83.427	214.932	-11.768	1.03015e-27	9.74659e-26	52.1719
PPP1R8	-20.4909	55.7942	-11.7612	1.09382e-27	1.025e-25	52.1128
TNPO3	-23.0246	53.3144	-11.7469	1.24146e-27	1.14689e-25	51.9879
PRPF4	-20.2069	38.3976	-11.7394	1.32628e-27	1.21379e-25	51.9227
MKI67	-26.6985	34.6026	-11.7247	1.50993e-27	1.36277e-25	51.7948
CTCF	-21.1156	49.7306	-11.7232	1.53035e-27	1.37486e-25	51.7815
NRD1	-31.2245	74.8577	-11.7141	1.65769e-27	1.47572e-25	51.7027
M6PR	-37.5391	63.2564	-11.6446	3.05792e-27	2.58144e-25	51.0987
PRKDC	-40.8489	52.4441	-11.6189	3.8329e-27	3.15409e-25	50.8759
WBP11	-27.6104	59.0041	-11.6083	4.2088e-27	3.43456e-25	50.7836
TFDP1	-73.0313	108.532	-11.5983	4.59192e-27	3.71623e-25	50.6977
TMPO	-35.01	50.099	-11.5848	5.17057e-27	4.13329e-25	50.5806
OAS3	-62.7953	61.2971	-11.5695	5.91472e-27	4.68603e-25	50.448
TXLNA	-28.8488	64.3078	-11.5635	6.23228e-27	4.86291e-25	50.3964
FOXM1	-37.9687	43.9407	-11.5171	9.35994e-27	7.05056e-25	49.9953
PARP9	-26.0404	30.9708	-11.4971	1.11469e-26	8.3008e-25	49.8229
MOB1A	-34.3167	89.8689	-11.4948	1.13742e-26	8.40617e-25	49.803
STAT3	-37.8165	73.0324	-11.4865	1.2228e-26	8.96952e-25	49.7316
CHTF8	-38.5281	88.1526	-11.4691	1.4229e-26	1.03984e-24	49.5822
API5	-24.7527	56.2634	-11.4542	1.62149e-26	1.17184e-24	49.4533
PATL1	-30.3632	56.8809	-11.437	1.88291e-26	1.33129e-24	49.3059
PTBP1	-51.497	162.873	-11.4231	2.12594e-26	1.47913e-24	49.1862
SMG5	-44.3084	90.9064	-11.4215	2.1559e-26	1.49057e-24	49.1724
MCFD2	-26.666	46.3114	-11.4018	2.56016e-26	1.75932e-24	49.0029
MSH2	-22.1775	33.7363	-11.3991	2.62036e-26	1.7944e-24	48.98
SLC39A1	-70.4593	150.926	-11.3783	3.13936e-26	2.13487e-24	48.8018
LARP1	-35.2133	78.9146	-11.3681	3.42969e-26	2.31622e-24	48.7146
UBE2Q1	-29.9146	78.7786	-11.3642	3.55021e-26	2.38938e-24	48.6805
PARP14	-29.7201	39.609	-11.3437	4.24243e-26	2.81654e-24	48.5048
RRM1	-48.7	70.5754	-11.2995	6.22251e-26	3.91858e-24	48.1271
TUBA1B	-175.277	266.372	-11.2913	6.68352e-26	4.19541e-24	48.0566
CHD4	-47.8971	125.967	-11.2763	7.60848e-26	4.76077e-24	47.9288
PRC1	-24.9004	36.2542	-11.2544	9.1953e-26	5.66321e-24	47.742
ITPR3	-29.2054	34.4963	-11.2299	1.13657e-25	6.82811e-24	47.5331
SRP72	-28.6057	67.9332	-11.2128	1.31652e-25	7.78973e-24	47.3882
SMC3	-29.6378	51.0012	-11.2117	1.33005e-25	7.84607e-24	47.3781
RPA1	-32.0798	57.5765	-11.1776	1.7835e-25	1.02054e-23	47.0889
UBQLN4	-26.478	54.3568	-11.1744	1.83336e-25	1.03776e-23	47.0617
HNRNPA2B1	-130.377	380.792	-11.1503	2.25689e-25	1.25571e-23	46.8568
MCM2	-52.761	66.3095	-11.0895	3.80639e-25	2.02576e-23	46.3414
HNRNPUL1	-72.9793	156.464	-11.0739	4.34935e-25	2.28984e-23	46.21
STARD7	-48.0064	107.606	-11.0656	4.67081e-25	2.44593e-23	46.1397
KHDRBS1	-62.4137	181.253	-11.0518	5.256e-25	2.73047e-23	46.0233
COPB1	-33.9636	75.9377	-11.0496	5.35868e-25	2.76184e-23	46.0042
KIF11	-20.1478	29.5786	-10.9867	9.17841e-25	4.48277e-23	45.4737
TIMELESS	-23.9162	37.399	-10.9699	1.0595e-24	5.08837e-23	45.3322
ACTR3	-25.8045	59.7007	-10.9107	1.7533e-24	8.07964e-23	44.8357
PSMD2	-88.2658	172.493	-10.9091	1.77816e-24	8.17495e-23	44.8219
MTPN	-69.3771	145.752	-10.9076	1.80001e-24	8.25604e-23	44.8098
ILF2	-175.663	346.262	-10.8846	2.18924e-24	9.81149e-23	44.6169
SERBP1	-55.7761	133.862	-10.8658	2.56944e-24	1.12578e-22	44.459
USP14	-24.8866	48.5475	-10.8567	2.77484e-24	1.20767e-22	44.3832
CNOT1	-27.7326	45.8356	-10.7579	6.4047e-24	2.62418e-22	43.5589
USP39	-21.2173	53.3651	-10.7499	6.84972e-24	2.79483e-22	43.4927
YES1	-27.3749	52.9177	-10.7338	7.85108e-24	3.17693e-22	43.3582
MELK	-29.1694	34.4249	-10.7232	8.58133e-24	3.46526e-22	43.2706
STAG2	-22.5595	36.4757	-10.6729	1.31075e-23	5.12394e-22	42.8531
PDIA6	-103.823	181.586	-10.6493	1.59888e-23	6.1356e-22	42.6573
SEC23B	-28.242	55.5907	-10.6439	1.67328e-23	6.37571e-22	42.6125
ATP2C1	-22.6087	50.5639	-10.6238	1.97932e-23	7.42625e-22	42.447
PRMT5	-29.4497	50.0605	-10.6013	2.39001e-23	8.86519e-22	42.2612
DAXX	-24.1054	72.6324	-10.6002	2.41337e-23	8.91809e-22	42.2516
HNRNPL	-36.2071	115.886	-10.5959	2.50106e-23	9.22471e-22	42.2165
DENR	-30.5004	80.8787	-10.5929	2.56442e-23	9.40529e-22	42.1918
CCNA2	-30.9755	44.6409	-10.5787	2.88815e-23	1.04749e-21	42.0747
MCM4	-53.364	79.67	-10.5592	3.4006e-23	1.21979e-21	41.9137
HMGN4	-65.6026	144.542	-10.5467	3.7758e-23	1.34453e-21	41.8106
TGOLN2	-49.56	100.164	-10.5443	3.8514e-23	1.36648e-21	41.7911
SSRP1	-59.9056	124.134	-10.5376	4.07164e-23	1.43941e-21	41.7363
RAD21	-69.1388	121.44	-10.526	4.48801e-23	1.56402e-21	41.6404
PLK1	-28.4092	38.2377	-10.519	4.75814e-23	1.65227e-21	41.5828
HNRNPM	-56.4649	159.584	-10.5119	5.04809e-23	1.74676e-21	41.5245
ADNP	-28.55	64.6719	-10.5087	5.1855e-23	1.79115e-21	41.4981
IARS	-28.131	49.6645	-10.4877	6.17434e-23	2.11037e-21	41.3261
POLDIP3	-27.6918	66.5829	-10.4731	6.97554e-23	2.35952e-21	41.2059
CTDSP2	-52.2458	94.83	-10.4716	7.06262e-23	2.38485e-21	41.1937
KIFC1	-34.1638	50.2649	-10.4676	7.29758e-23	2.4514e-21	41.1614
WNK1	-21.5705	35.2756	-10.465	7.45615e-23	2.49622e-21	41.1403
HNRNPC	-59.5387	174.511	-10.4592	7.82481e-23	2.60185e-21	41.0927
WDTC1	-21.0513	44.0074	-10.4448	8.8219e-23	2.90381e-21	40.9746
SAMD4B	-24.1191	53.5414	-10.4411	9.09767e-23	2.98455e-21	40.9442
FAM120A	-33.4927	87.8767	-10.4243	1.04562e-22	3.39066e-21	40.8071
C1orf43	-96.6503	257.026	-10.4202	1.08194e-22	3.50244e-21	40.7735
CDC42BPB	-20.2275	44.778	-10.4185	1.09737e-22	3.54653e-21	40.7596
TRIM26	-25.9988	63.5318	-10.4046	1.23181e-22	3.9614e-21	40.6457
UBE2Z	-26.8515	76.1518	-10.3603	1.77747e-22	5.55211e-21	40.2845
IPO7	-31.4541	58.5672	-10.3398	2.10663e-22	6.52822e-21	40.1171
ACTL6A	-31.9908	66.3876	-10.336	2.17358e-22	6.72504e-21	40.0863
PIP5K1A	-23.7068	38.7297	-10.3327	2.23273e-22	6.89718e-21	40.0599
RIC8A	-21.8654	53.946	-10.3142	2.60059e-22	7.89651e-21	39.9097
MAGT1	-29.5532	68.1335	-10.3095	2.70509e-22	8.18844e-21	39.8709
SF3A1	-30.2173	64.0504	-10.2926	3.10969e-22	9.38416e-21	39.7336
STAT1	-176.308	174.463	-10.272	3.68215e-22	1.09431e-20	39.5671
HAX1	-42.4654	113.751	-10.2612	4.02543e-22	1.18732e-20	39.4794
POLE3	-43.1378	93.1513	-10.2553	4.22468e-22	1.24235e-20	39.4318
G3BP2	-23.8757	54.2034	-10.2482	4.47813e-22	1.30512e-20	39.3744
NUDT21	-26.7164	53.7815	-10.2357	4.9645e-22	1.43619e-20	39.2729
YWHAG	-89.8425	213.58	-10.2317	5.13012e-22	1.48191e-20	39.2405
SRPK1	-22.2613	45.2606	-10.2272	5.32442e-22	1.53126e-20	39.2039
ANLN	-30.0723	37.6106	-10.1978	6.77291e-22	1.91965e-20	38.967
CDCA8	-29.6916	45.5886	-10.1841	7.58063e-22	2.12399e-20	38.856
CKAP2	-21.2609	32.2085	-10.1633	8.98763e-22	2.47571e-20	38.6883
AAR2	-20.2578	56.7907	-10.1486	1.01368e-21	2.75352e-20	38.5699
IMMT	-31.3337	81.9838	-10.1419	1.07089e-21	2.90489e-20	38.5158
KDM5C	-20.8343	50.3577	-10.1412	1.07688e-21	2.91712e-20	38.5103
COPB2	-27.4835	69.9772	-10.139	1.09612e-21	2.96513e-20	38.4929
SPIN1	-26.5669	57.1068	-10.1383	1.10207e-21	2.97711e-20	38.4875
CIAO1	-20.6008	63.158	-10.091	1.62221e-21	4.29338e-20	38.1069
PAIP1	-28.4583	58.5499	-10.0662	1.98487e-21	5.19702e-20	37.9082
HNRNPH3	-28.2239	78.5853	-10.0521	2.22458e-21	5.76301e-20	37.7959
EIF4G2	-132.026	324.223	-10.0516	2.23448e-21	5.77339e-20	37.7916
ABCF2	-20.8576	54.5959	-10.0347	2.56299e-21	6.53597e-20	37.6565
NAA50	-38.8389	92.2439	-10.02	2.88746e-21	7.32487e-20	37.5392
SPTLC1	-22.8725	44.8177	-10.0183	2.92859e-21	7.41039e-20	37.5252
EPRS	-36.6588	77.2462	-10.0153	3.00125e-21	7.58445e-20	37.5011
SF3B2	-29.9068	92.9521	-10.0122	3.07613e-21	7.75366e-20	37.4769
KIAA0100	-27.3915	52.0276	-9.98868	3.72296e-21	9.29643e-20	37.289
IQGAP1	-37.9773	74.6004	-9.97874	4.03502e-21	1.00033e-19	37.2097
TPX2	-79.3726	110.354	-9.97724	4.08419e-21	1.00996e-19	37.1978
RBMX	-32.6487	89.0653	-9.97392	4.19538e-21	1.03484e-19	37.1714
POLR2B	-21.7269	50.0432	-9.96524	4.50059e-21	1.10456e-19	37.1022
HDGF	-163.806	380.254	-9.96229	4.60952e-21	1.12847e-19	37.0787
MFN2	-38.0846	93.7274	-9.95947	4.71582e-21	1.15305e-19	37.0562
NCAPD2	-50.8691	69.3349	-9.95702	4.80991e-21	1.17459e-19	37.0368
UBAP1	-32.843	77.2809	-9.9451	5.29649e-21	1.28222e-19	36.9419
YTHDF2	-22.4016	69.6287	-9.94269	5.40066e-21	1.30261e-19	36.9228
NSUN2	-31.0482	64.7365	-9.93181	5.89643e-21	1.41003e-19	36.8363
TOP2A	-78.3053	96.9447	-9.92159	6.40324e-21	1.52564e-19	36.7551
PCBP1	-121.442	331.118	-9.87535	9.29297e-21	2.16412e-19	36.3885
CANX	-113.097	280.88	-9.87505	9.31525e-21	2.16674e-19	36.3862
PYGO2	-31.9069	76.6506	-9.87015	9.69014e-21	2.25126e-19	36.3473
SZRD1	-30.0877	98.1343	-9.86414	1.01698e-20	2.35432e-19	36.2998
MT-ND3	10764.1	17380.7	9.86055	1.04673e-20	2.41748e-19	36.2714
HIATL1	-34.2629	77.7316	-9.85047	1.13503e-20	2.59747e-19	36.1917
ARID1A	-20.4817	42.3036	-9.83592	1.27575e-20	2.89855e-19	36.0766
JOSD1	-25.4429	59.0695	-9.83426	1.29278e-20	2.93386e-19	36.0636
MT-CO2	15765.3	32790.6	9.83148	1.32195e-20	2.99658e-19	36.0416
EIF2S3	-69.3404	167.395	-9.83103	1.3268e-20	3.0041e-19	36.038
ETF1	-30.4699	78.9818	-9.81996	1.44988e-20	3.25641e-19	35.9507
BRD2	-43.3451	109.335	-9.81124	1.55493e-20	3.48037e-19	35.8819
ARF3	-45.3711	126.796	-9.79748	1.73606e-20	3.85933e-19	35.7734
CDV3	-47.5327	109.084	-9.7928	1.80231e-20	3.9885e-19	35.7366
KPNA2	-101.36	184.919	-9.78578	1.90656e-20	4.21445e-19	35.6812
CAPRIN1	-49.5804	91.6098	-9.78155	1.9721e-20	4.34951e-19	35.648
CIZ1	-28.3193	69.8215	-9.7712	2.14229e-20	4.69316e-19	35.5665
CSTF2	-20.1804	39.9696	-9.76675	2.21984e-20	4.84678e-19	35.5315
SF3A3	-25.5559	65.9414	-9.75019	2.53364e-20	5.50126e-19	35.4014
ABCF1	-36.9045	87.1795	-9.74735	2.59174e-20	5.61496e-19	35.3791
DNAJA1	-131.529	241.657	-9.7433	2.67704e-20	5.78696e-19	35.3472
MTDH	-35.238	69.1114	-9.73953	2.75866e-20	5.93717e-19	35.3177
ACBD3	-23.3903	57.0324	-9.73307	2.9047e-20	6.23095e-19	35.2669
PJA1	-20.6317	38.6036	-9.72818	3.02011e-20	6.45027e-19	35.2285
LAMP2	-51.1857	88.6616	-9.70281	3.69649e-20	7.79286e-19	35.0297
STRAP	-70.868	169.386	-9.67199	4.72294e-20	9.88235e-19	34.7886
AURKA	-24.3462	39.6977	-9.66402	5.03185e-20	1.05063e-18	34.7262
SYNCRIP	-25.2889	70.7408	-9.65677	5.32986e-20	1.1093e-18	34.6696
DDB1	-26.7994	67.5746	-9.63676	6.24669e-20	1.2878e-18	34.5134
TARS	-35.4922	62.5261	-9.63457	6.35584e-20	1.30618e-18	34.4964
LMNB1	-45.9989	68.1063	-9.62776	6.70842e-20	1.36995e-18	34.4433
DDX21	-42.7543	72.2927	-9.62764	6.7151e-20	1.36995e-18	34.4423
XPO6	-21.4514	54.3341	-9.62648	6.77699e-20	1.3797e-18	34.4333
KHSRP	-52.5705	156.672	-9.61601	7.36238e-20	1.49214e-18	34.3518
YWHAQ	-189.505	362.316	-9.61553	7.39075e-20	1.49533e-18	34.348
KIF2C	-26.4329	44.7805	-9.61329	7.52262e-20	1.51731e-18	34.3306
TINF2	-23.913	58.6006	-9.61237	7.57775e-20	1.52685e-18	34.3234
RAB14	-31.9537	90.2462	-9.61003	7.71947e-20	1.55381e-18	34.3052
SET	-109.101	272.851	-9.58053	9.74752e-20	1.91865e-18	34.0757
CEP55	-22.0156	36.3849	-9.56432	1.10778e-19	2.15879e-18	33.9498
PRCC	-25.4041	75.0198	-9.54815	1.25848e-19	2.44503e-18	33.8243
CAPZA1	-52.5261	151.045	-9.52831	1.4714e-19	2.84475e-18	33.6706
NFE2L1	-70.7532	158.885	-9.52221	1.54369e-19	2.97571e-18	33.6234
H2AFV	-40.0827	94.2893	-9.52038	1.56609e-19	3.01296e-18	33.6092
ACLY	-55.2846	120.04	-9.50299	1.79556e-19	3.43083e-18	33.4747
HIAT1	-23.0388	56.6847	-9.49371	1.93144e-19	3.67612e-18	33.403
UBE2R2	-28.6556	79.3394	-9.49222	1.95411e-19	3.71205e-18	33.3915
FAM168B	-25.6636	54.0445	-9.49207	1.95641e-19	3.71282e-18	33.3903
GNB1	-67.8134	202.062	-9.48855	2.01125e-19	3.80582e-18	33.3631
NUSAP1	-44.051	64.9734	-9.4692	2.34108e-19	4.375e-18	33.2138
HSPA8	-335.555	643.584	-9.45936	2.52893e-19	4.70617e-18	33.1379
SRSF1	-54.6988	195.533	-9.45929	2.5303e-19	4.70617e-18	33.1373
DDX3X	-39.6562	104.879	-9.45216	2.67567e-19	4.96711e-18	33.0824
PTPN1	-25.3484	60.3472	-9.45073	2.70585e-19	5.01837e-18	33.0713
TPR	-21.3013	40.8489	-9.44911	2.7404e-19	5.07286e-18	33.0589
ABL1	-20.1179	42.7218	-9.43671	3.01971e-19	5.52719e-18	32.9634
CSNK2A1	-22.8752	62.2649	-9.43195	3.13418e-19	5.72601e-18	32.9268
PSMD10	-22.1772	62.3504	-9.4311	3.15522e-19	5.75372e-18	32.9202
NUB1	-20.4367	46.9334	-9.41797	3.49636e-19	6.34039e-18	32.8193
YME1L1	-27.0608	67.4134	-9.40679	3.81556e-19	6.86837e-18	32.7333
CBX1	-44.1181	91.4997	-9.39223	4.27472e-19	7.67374e-18	32.6216
MRPL49	-25.9552	69.0871	-9.3701	5.07984e-19	9.01165e-18	32.4519
SON	-27.0398	58.6485	-9.36874	5.13372e-19	9.09899e-18	32.4415
BCAS2	-34.7677	100.686	-9.36671	5.21578e-19	9.23608e-18	32.4259
TUBA1C	-60.4643	124.938	-9.36353	5.34648e-19	9.45044e-18	32.4016
GNA13	-25.5297	53.309	-9.35956	5.51441e-19	9.72095e-18	32.3712
DCAF7	-28.3499	67.8614	-9.34634	6.11181e-19	1.07354e-17	32.27
CANT1	-27.3581	63.0039	-9.34525	6.16409e-19	1.08175e-17	32.2617
DARS	-25.1331	68.6707	-9.33023	6.92729e-19	1.20596e-17	32.1469
VCP	-92.1164	251.22	-9.31637	7.71479e-19	1.33712e-17	32.041
CSDE1	-113.009	304.866	-9.31605	7.7341e-19	1.33928e-17	32.0385
LMNB2	-49.2428	87.5409	-9.30117	8.6804e-19	1.49259e-17	31.925
PRPF8	-33.6822	79.7819	-9.29342	9.21793e-19	1.57533e-17	31.866
ATL2	-22.8678	39.7427	-9.29257	9.27869e-19	1.58433e-17	31.8595
CDCA5	-23.1712	36.8301	-9.28351	9.9539e-19	1.68785e-17	31.7904
PSMB2	-37.1259	106.244	-9.2787	1.03315e-18	1.74735e-17	31.7538
APOL6	-24.0669	31.4252	-9.26074	1.18718e-18	1.98115e-17	31.6172
STAU1	-46.7233	137.285	-9.25469	1.24406e-18	2.06658e-17	31.5712
MRPL3	-37.3785	115.37	-9.24795	1.31059e-18	2.17157e-17	31.52
GRB2	-38.9495	116.214	-9.2391	1.40337e-18	2.31551e-17	31.4527
UBXN4	-33.0266	87.5812	-9.19691	1.94299e-18	3.13713e-17	31.1329
PTPRA	-23.176	67.0708	-9.18265	2.16839e-18	3.48098e-17	31.025
PTPN11	-29.4095	49.2218	-9.18126	2.19171e-18	3.51554e-17	31.0145
CUL1	-25.8973	73.08	-9.17995	2.21376e-18	3.548e-17	31.0046
UBA2	-43.5499	86.075	-9.17957	2.22036e-18	3.55276e-17	31.0017
PLSCR1	-35.4205	58.1605	-9.15885	2.60361e-18	4.12221e-17	30.8452
ADIPOR2	-23.4217	47.1659	-9.15633	2.6545e-18	4.19939e-17	30.8261
SFPQ	-40.4616	141.13	-9.14199	2.96323e-18	4.65769e-17	30.718
DNAJC5	-28.8217	67.7187	-9.13988	3.0116e-18	4.72236e-17	30.7021
HP1BP3	-34.0361	84.3954	-9.1156	3.62748e-18	5.62503e-17	30.5192
JAK1	-32.0617	71.9584	-9.1155	3.63038e-18	5.62507e-17	30.5184
SNAPIN	-24.6538	70.7406	-9.11218	3.72368e-18	5.75598e-17	30.4935
CSE1L	-56.5391	135.388	-9.05725	5.66574e-18	8.5488e-17	30.081
SCRN1	-24.7411	37.7425	-9.05147	5.92105e-18	8.89975e-17	30.0376
MT-CO3	12928.7	28789.9	9.04331	6.30084e-18	9.44163e-17	29.9765
KIF20A	-21.7257	34.5427	-9.04055	6.4348e-18	9.62028e-17	29.9559
MAZ	-30.8053	60.9029	-9.03294	6.81842e-18	1.01705e-16	29.899
PARP12	-20.5822	33.9775	-8.99186	9.31803e-18	1.35482e-16	29.5921
C6orf106	-55.6997	118.568	-8.96858	1.11173e-17	1.60688e-16	29.4186
PITPNB	-21.0666	51.6025	-8.95546	1.22782e-17	1.76297e-16	29.321
SPTAN1	-24.8999	58.0103	-8.95431	1.23859e-17	1.77713e-16	29.3124
CNP	-21.2335	55.8939	-8.9533	1.24807e-17	1.78812e-16	29.3049
AP2B1	-38.0522	87.7167	-8.95033	1.27641e-17	1.82738e-16	29.2829
METAP2	-22.3718	60.5828	-8.94777	1.30142e-17	1.86182e-16	29.2638
PSIP1	-25.886	28.9494	-8.91694	1.64294e-17	2.32325e-16	29.0349
ZDHHC5	-27.4133	90.986	-8.89548	1.9316e-17	2.70991e-16	28.8758
PSMC2	-26.1865	91.4363	-8.88821	2.04042e-17	2.85237e-16	28.822
LRRC42	-27.572	50.7128	-8.87751	2.21152e-17	3.06747e-16	28.7429
FDPS	-39.1813	84.6567	-8.87507	2.2526e-17	3.11893e-16	28.7248
INTS1	-22.8997	60.3413	-8.86468	2.43563e-17	3.35456e-16	28.6481
XPOT	-26.1613	47.859	-8.86109	2.5023e-17	3.43672e-16	28.6216
DYNC1H1	-36.6158	83.5876	-8.85205	2.67823e-17	3.65527e-16	28.5548
IFIH1	-20.6151	22.1891	-8.85	2.7198e-17	3.70943e-16	28.5397
HTATSF1	-45.861	109.288	-8.84509	2.82198e-17	3.84076e-16	28.5035
LSM14B	-20.1127	51.9895	-8.83828	2.9701e-17	4.02835e-16	28.4532
ARF6	-58.0278	165.38	-8.83381	3.07143e-17	4.15669e-16	28.4203
ALKBH5	-33.381	92.0136	-8.82853	3.19557e-17	4.31028e-16	28.3813
CKS1B	-31.7726	55.6998	-8.82362	3.31543e-17	4.46326e-16	28.3452
YTHDF1	-22.4863	76.7418	-8.81158	3.6284e-17	4.84405e-16	28.2566
RAD23B	-53.6346	140.918	-8.79826	4.00892e-17	5.33026e-16	28.1586
MTHFD2	-31.8947	48.0077	-8.79241	4.18824e-17	5.54609e-16	28.1156
ATP6V1A	-21.3169	50.0966	-8.79051	4.24808e-17	5.61773e-16	28.1017
TRIM21	-25.2026	41.9173	-8.79036	4.25281e-17	5.6202e-16	28.1006
PRUNE	-21.3432	41.1273	-8.78512	4.42294e-17	5.83714e-16	28.0621
CBX3	-54.1436	156.949	-8.77138	4.90104e-17	6.42483e-16	27.9613
ANP32E	-50.8496	84.6784	-8.77127	4.90501e-17	6.42573e-16	27.9605
FEN1	-51.693	84.7875	-8.76765	5.03941e-17	6.58857e-16	27.9339
OAS2	-57.1522	62.4569	-8.75517	5.53167e-17	7.1975e-16	27.8424
EXT2	-27.0989	54.4483	-8.74834	5.82064e-17	7.54449e-16	27.7924
HNRNPA3	-47.401	158.93	-8.74041	6.17514e-17	7.98811e-16	27.7344
IRAK1	-73.2104	143.988	-8.7266	6.84382e-17	8.81238e-16	27.6334
EIF3A	-40.8932	100.515	-8.69927	8.38624e-17	1.06791e-15	27.4338
LMAN1	-29.0404	66.9269	-8.69361	8.74629e-17	1.11159e-15	27.3925
SF3B3	-27.5253	57.0115	-8.68849	9.08498e-17	1.15389e-15	27.3552
KLF10	-32.6889	52.1701	-8.68791	9.1239e-17	1.15733e-15	27.351
PTBP3	-30.9266	69.6915	-8.66095	1.11427e-16	1.39712e-15	27.1548
RBBP7	-24.6166	63.8629	-8.65965	1.12501e-16	1.40878e-15	27.1454
DDX58	-23.4288	23.5717	-8.65489	1.16544e-16	1.45661e-15	27.1107
PARP1	-44.3848	83.9739	-8.64969	1.2111e-16	1.50982e-15	27.073
ZNF146	-39.4826	86.8564	-8.6423	1.27922e-16	1.58869e-15	27.0192
NUCKS1	-83.4916	163.958	-8.63644	1.33579e-16	1.65161e-15	26.9768
AKIRIN1	-30.6026	67.1259	-8.63518	1.34836e-16	1.66399e-15	26.9676
TEX261	-24.3876	71.5235	-8.62863	1.41524e-16	1.73777e-15	26.92
SRSF3	-33.5442	133.87	-8.62752	1.42691e-16	1.75101e-15	26.912
WDR82	-26.5625	77.1001	-8.62675	1.43503e-16	1.75986e-15	26.9064
CERS2	-44.4866	100.637	-8.62166	1.48992e-16	1.82261e-15	26.8696
CHMP5	-44.4512	112.324	-8.62104	1.49677e-16	1.82985e-15	26.8651
CAB39	-21.2246	50.569	-8.61232	1.59631e-16	1.94547e-15	26.8018
MT-ATP6	10304.8	20625.2	8.61162	1.60463e-16	1.95197e-15	26.7967
ZWINT	-40.8613	73.1106	-8.60865	1.64017e-16	1.99396e-15	26.7752
DKC1	-31.8556	79.8598	-8.60513	1.68328e-16	2.0451e-15	26.7498
GCN1L1	-23.275	59.534	-8.60283	1.71204e-16	2.07876e-15	26.7331
PLEKHM2	-23.5265	73.9867	-8.59245	1.84815e-16	2.23294e-15	26.658
MAP4K4	-22.0178	37.9558	-8.5885	1.90269e-16	2.29601e-15	26.6295
RCC2	-79.2637	218.364	-8.58827	1.90598e-16	2.29857e-15	26.6278
GNG12	-33.0913	62.7147	-8.57502	2.1012e-16	2.51506e-15	26.5321
SAMHD1	-45.1718	62.1535	-8.57436	2.11142e-16	2.52301e-15	26.5273
TMED7	-22.3129	60.8567	-8.569	2.19631e-16	2.61521e-15	26.4886
PTGES3	-96.1974	304.022	-8.56899	2.19659e-16	2.61521e-15	26.4885
CALU	-75.49	139.772	-8.56202	2.31199e-16	2.74426e-15	26.4382
CS	-26.1196	77.9074	-8.56107	2.32818e-16	2.76014e-15	26.4314
TAP1	-148.46	157.981	-8.53905	2.73685e-16	3.21652e-15	26.2727
HSPA5	-233.176	599.91	-8.53786	2.76079e-16	3.23967e-15	26.2641
MAPRE1	-79.9799	206.894	-8.53713	2.77558e-16	3.25313e-15	26.2589
POFUT1	-22.48	42.2264	-8.53535	2.81217e-16	3.29404e-15	26.246
SNX12	-28.4714	91.9524	-8.52352	3.06682e-16	3.58273e-15	26.1609
RNF26	-26.3135	64.3067	-8.51579	3.24565e-16	3.77246e-15	26.1053
LSM14A	-36.6705	99.559	-8.49119	3.88542e-16	4.46838e-15	25.9287
CDC42SE1	-60.2484	142.566	-8.49028	3.91135e-16	4.49552e-15	25.9222
PSMD1	-22.9484	66.301	-8.47634	4.33065e-16	4.95419e-15	25.8223
ARCN1	-41.3141	126.516	-8.47504	4.37198e-16	4.99855e-15	25.813
DLST	-23.2618	67.9183	-8.46474	4.71336e-16	5.36381e-15	25.7392
PRPS1	-27.223	55.373	-8.46146	4.82731e-16	5.48711e-15	25.7157
ATXN2L	-28.6003	74.9698	-8.45801	4.95034e-16	5.61718e-15	25.691
SRSF7	-27.6827	106.338	-8.45462	5.07413e-16	5.75097e-15	25.6668
EIF2AK1	-34.1539	117.784	-8.42544	6.27484e-16	7.05064e-15	25.4584
NONO	-109.371	242.087	-8.41673	6.68507e-16	7.49869e-15	25.3963
COPS3	-25.8506	60.231	-8.40724	7.16184e-16	8.01512e-15	25.3287
PUM2	-21.7368	69.3809	-8.40485	7.28753e-16	8.14647e-15	25.3116
PCNP	-32.7808	109.187	-8.40319	7.37574e-16	8.24038e-15	25.2998
PLBD2	-23.7824	58.335	-8.40306	7.38288e-16	8.24219e-15	25.2988
UBQLN2	-20.6414	54.4837	-8.40256	7.40939e-16	8.26383e-15	25.2953
JARID2	-20.379	24.8641	-8.40088	7.50031e-16	8.34623e-15	25.2834
ATP2A2	-40.4067	85.5458	-8.39853	7.62917e-16	8.4848e-15	25.2667
HMGB1	-38.8595	112.357	-8.39492	7.83178e-16	8.69039e-15	25.2409
SEC61A1	-92.6069	322.556	-8.36347	9.8359e-16	1.07799e-14	25.0174
WDR5	-20.797	52.3639	-8.35741	1.02765e-15	1.12313e-14	24.9744
ITGB1	-89.7548	152.209	-8.35697	1.03088e-15	1.12603e-14	24.9713
IARS2	-38.5276	95.8801	-8.34666	1.11065e-15	1.20778e-14	24.8982
VPS26A	-21.1044	63.0492	-8.34274	1.14252e-15	1.23923e-14	24.8705
PTPN12	-24.4839	48.5243	-8.33477	1.2102e-15	1.30949e-14	24.814
PTPLB	-24.065	45.3308	-8.33428	1.21452e-15	1.31271e-14	24.8105
STAT2	-37.2939	75.2781	-8.33406	1.21645e-15	1.31408e-14	24.809
CLTC	-49.2571	125.126	-8.32344	1.31327e-15	1.41399e-14	24.7338
DNAJC8	-29.2638	112.506	-8.32238	1.3234e-15	1.42347e-14	24.7263
DDX60	-22.2858	21.6963	-8.31921	1.35394e-15	1.45139e-14	24.7039
SLC25A5	-288.582	692.441	-8.31691	1.37661e-15	1.47489e-14	24.6876
HYOU1	-38.068	79.6213	-8.31501	1.39555e-15	1.49436e-14	24.6742
GOLPH3	-56.3872	134.197	-8.30703	1.47811e-15	1.57845e-14	24.6179
SSR3	-36.2531	108.551	-8.28907	1.68211e-15	1.78269e-14	24.4911
SMARCA5	-21.0197	42.3978	-8.28179	1.77244e-15	1.87234e-14	24.4398
SAE1	-52.4408	143.778	-8.27144	1.90927e-15	2.01146e-14	24.3668
APH1A	-97.0558	255.954	-8.26034	2.0676e-15	2.17242e-14	24.2887
PMAIP1	-21.2065	27.2831	-8.25996	2.07327e-15	2.17605e-14	24.286
PRKAR1A	-30.8007	92.3652	-8.24621	2.28793e-15	2.39237e-14	24.1894
DAP3	-24.9764	79.0623	-8.24568	2.29674e-15	2.39902e-14	24.1856
MMADHC	-32.8178	112.986	-8.23965	2.3981e-15	2.49823e-14	24.1433
GALNT2	-24.9029	52.8835	-8.23008	2.56809e-15	2.67054e-14	24.0761
MCM3	-83.4863	160.61	-8.23003	2.56895e-15	2.67054e-14	24.0758
PCNA	-189.073	386.095	-8.22454	2.672e-15	2.77618e-14	24.0372
RNF19B	-34.3706	66.7257	-8.20775	3.01249e-15	3.10525e-14	23.9196
PPP2R5D	-26.601	62.6274	-8.19534	3.29152e-15	3.3751e-14	23.8327
U2AF2	-46.6322	167.493	-8.17713	3.74795e-15	3.81516e-14	23.7054
HNRNPH1	-32.4158	94.7434	-8.17418	3.8274e-15	3.88996e-14	23.6849
VAMP3	-36.9369	129.276	-8.16428	4.10701e-15	4.15259e-14	23.6157
PICALM	-30.413	89.6882	-8.13108	5.19976e-15	5.19313e-14	23.3844
RALA	-34.8775	64.3941	-8.12377	5.4765e-15	5.44453e-14	23.3336
PPP2CA	-21.0105	78.3566	-8.10467	6.27037e-15	6.18666e-14	23.2009
YKT6	-42.4878	111.764	-8.10437	6.28347e-15	6.19646e-14	23.1989
DSG2	-66.596	102.327	-8.08747	7.0814e-15	6.95184e-14	23.0817
MAT2A	-35.8062	93.6418	-8.08511	7.20086e-15	7.06203e-14	23.0653
PGAM5	-20.683	56.2056	-8.07256	7.86801e-15	7.6808e-14	22.9784
ARPP19	-26.8773	65.539	-8.06947	8.04167e-15	7.83562e-14	22.957
RFX5	-22.246	37.0651	-8.05611	8.83639e-15	8.57585e-14	22.8647
GUCD1	-21.5901	60.8731	-8.05149	9.12919e-15	8.85124e-14	22.8327
CCT5	-82.3822	165.187	-8.04372	9.64262e-15	9.31676e-14	22.7791
CDCA4	-25.0646	47.2946	-8.04237	9.73446e-15	9.40086e-14	22.7698
PCMT1	-23.3154	64.9654	-8.04052	9.86217e-15	9.5195e-14	22.757
DVL3	-22.4674	74.4638	-8.02286	1.11673e-14	1.07264e-13	22.6352
CCT3	-98.4017	307.64	-8.00052	1.3064e-14	1.24748e-13	22.4815
TAF11	-20.1766	67.7653	-7.9987	1.32317e-14	1.26265e-13	22.469
GBA	-23.7961	50.7442	-7.98486	1.45803e-14	1.38485e-13	22.3739
OXCT1	-20.037	21.7298	-7.95979	1.73768e-14	1.63147e-13	22.202
RBBP4	-25.6916	62.3253	-7.95672	1.77534e-14	1.66205e-13	22.181
PPP1R18	-40.1074	66.3076	-7.95355	1.8152e-14	1.69612e-13	22.1592
TUBB	-429.958	1015.64	-7.94473	1.93051e-14	1.79701e-13	22.0989
EIF5	-23.2096	71.2514	-7.93025	2.13582e-14	1.97871e-13	21.9999
LBR	-20.2157	41.1212	-7.92151	2.26994e-14	2.09702e-13	21.9402
OGDH	-29.1537	85.6281	-7.92037	2.28801e-14	2.11271e-13	21.9324
CDK1	-24.1917	50.2365	-7.92019	2.29082e-14	2.11431e-13	21.9312
SUMO3	-41.7942	122.382	-7.91424	2.38783e-14	2.19454e-13	21.8906
DDX1	-30.5845	102.05	-7.91373	2.39634e-14	2.20133e-13	21.8871
UBE2D3	-22.31	72.0155	-7.9058	2.53226e-14	2.31641e-13	21.8331
PPP4R1	-26.7762	55.7951	-7.90319	2.57879e-14	2.35787e-13	21.8153
WASF2	-43.142	81.5417	-7.89466	2.73637e-14	2.49148e-13	21.7572
TM9SF2	-72.4064	197.497	-7.89242	2.77921e-14	2.52931e-13	21.7419
RFC2	-25.2396	66.9155	-7.89029	2.82069e-14	2.56349e-13	21.7274
COPA	-76.9641	147.914	-7.88298	2.96765e-14	2.68957e-13	21.6777
RPN1	-99.5989	346.336	-7.88167	2.99476e-14	2.71037e-13	21.6688
ZMAT2	-38.6858	140.322	-7.87733	3.08638e-14	2.78556e-13	21.6393
RALB	-29.6083	73.4824	-7.86117	3.45225e-14	3.10433e-13	21.5295
GLO1	-79.7191	185.448	-7.8564	3.56827e-14	3.19984e-13	21.4972
RPN2	-207.075	567.806	-7.84737	3.79864e-14	3.39709e-13	21.4359
HMGN2	-176.266	316.864	-7.84261	3.92586e-14	3.50767e-13	21.4036
TNFAIP1	-25.0585	78.7043	-7.84136	3.96002e-14	3.53657e-13	21.3951
TMEM106C	-42.4819	72.238	-7.83525	4.13096e-14	3.68251e-13	21.3537
RAN	-69.6551	203.131	-7.80867	4.96309e-14	4.38044e-13	21.174
PHF5A	-23.6372	80.5762	-7.80841	4.97202e-14	4.38636e-13	21.1723
RANBP9	-29.1746	58.4797	-7.79666	5.39143e-14	4.73503e-13	21.093
RAB5C	-32.6544	119.031	-7.79275	5.53858e-14	4.84904e-13	21.0666
UBE2L6	-117.499	176.779	-7.78982	5.65152e-14	4.93689e-13	21.0468
CDCP1	-33.7903	48.8781	-7.78605	5.80019e-14	5.06432e-13	21.0214
RAD23A	-41.1549	146.585	-7.77792	6.13385e-14	5.33917e-13	20.9666
POLR2A	-36.1714	89.5816	-7.77542	6.24033e-14	5.42222e-13	20.9498
FLII	-32.1278	91.7352	-7.77372	6.31374e-14	5.47872e-13	20.9383
MT-ND2	7917.72	15450.5	7.76901	6.5214e-14	5.6489e-13	20.9067
SND1	-33.6483	110.602	-7.76408	6.74621e-14	5.83074e-13	20.8735
GBP1	-85.2856	73.017	-7.76006	6.93513e-14	5.97819e-13	20.8464
COLGALT1	-47.5597	112.261	-7.75086	7.38701e-14	6.34816e-13	20.7846
IGF2BP2	-22.4013	21.6325	-7.74758	7.55536e-14	6.47578e-13	20.7626
ATP1A1	-134.662	282.943	-7.74343	7.7734e-14	6.65103e-13	20.7347
ICMT	-27.1482	90.3085	-7.74231	7.83305e-14	6.6933e-13	20.7272
EIF4A3	-25.7588	84.3322	-7.73487	8.24285e-14	7.02507e-13	20.6773
KIAA0020	-22.9836	49.7122	-7.72694	8.70323e-14	7.39812e-13	20.6241
TYMS	-44.6508	65.5315	-7.72373	8.89644e-14	7.5558e-13	20.6026
CNBP	-131.232	523.027	-7.72218	8.99156e-14	7.63328e-13	20.5922
MT-CYB	8471.13	16432.1	7.71389	9.5159e-14	8.05745e-13	20.5367
RAB7A	-91.6471	359.193	-7.70972	9.79147e-14	8.28363e-13	20.5088
PDIA4	-139.038	346.396	-7.7086	9.86658e-14	8.33997e-13	20.5013
ACTR1B	-23.8736	78.2023	-7.69976	1.04808e-13	8.84011e-13	20.4422
LASP1	-73.0258	149.833	-7.69744	1.06483e-13	8.96974e-13	20.4267
FUS	-27.6057	89.9694	-7.69658	1.07104e-13	9.01817e-13	20.421
TMED10	-50.4025	179.776	-7.6948	1.08416e-13	9.11692e-13	20.409
NASP	-26.0223	62.9599	-7.69059	1.11575e-13	9.3665e-13	20.3809
ANXA7	-46.5906	133.462	-7.68483	1.1605e-13	9.71712e-13	20.3424
PLXNA1	-24.2844	44.384	-7.68277	1.17689e-13	9.84594e-13	20.3287
CDKN1B	-31.6958	70.9174	-7.68022	1.1975e-13	9.99701e-13	20.3117
PI4KB	-26.8577	62.8349	-7.67741	1.2207e-13	1.01777e-12	20.2929
PPP1CB	-49.7033	157.286	-7.66589	1.32034e-13	1.09664e-12	20.2161
FTSJ1	-20.4717	57.3893	-7.65766	1.39633e-13	1.15682e-12	20.1614
SCAMP3	-38.7473	130.011	-7.63171	1.6656e-13	1.36261e-12	19.9888
IFI16	-71.641	93.6321	-7.62774	1.71112e-13	1.39926e-12	19.9624
CCNB1	-51.0969	97.1948	-7.62553	1.73691e-13	1.41916e-12	19.9478
SURF4	-79.9053	243.946	-7.6166	1.84526e-13	1.50393e-12	19.8886
CALM3	-81.437	262.992	-7.59763	2.09817e-13	1.69935e-12	19.7629
CMPK1	-36.7549	124.373	-7.59758	2.09892e-13	1.69935e-12	19.7625
RPS6KA4	-29.306	65.4134	-7.58931	2.21954e-13	1.79552e-12	19.7079
IRF2BP2	-30.9088	85.8263	-7.58583	2.2724e-13	1.83753e-12	19.6848
TAP2	-21.5556	31.9339	-7.58491	2.28657e-13	1.84823e-12	19.6787
PRPF19	-68.0802	203.19	-7.58448	2.29321e-13	1.85282e-12	19.6759
USP5	-35.5661	111.028	-7.58314	2.31404e-13	1.86658e-12	19.6671
SUPT5H	-21.4419	68.3163	-7.58089	2.34945e-13	1.89358e-12	19.6522
TRIM22	-24.9489	30.1483	-7.58009	2.36231e-13	1.90159e-12	19.6469
MAPKAPK2	-32.0706	102.536	-7.5593	2.71797e-13	2.16636e-12	19.5097
FAM83D	-29.9558	49.4423	-7.55473	2.80297e-13	2.22703e-12	19.4795
PRPS2	-40.5367	84.9663	-7.55287	2.83831e-13	2.25236e-12	19.4673
DPP3	-21.3309	67.2453	-7.54814	2.93006e-13	2.31766e-12	19.4361
MRPL9	-40.5206	97.3531	-7.54764	2.93995e-13	2.3236e-12	19.4329
CTNNA1	-40.1449	133.677	-7.54243	3.04492e-13	2.40076e-12	19.3985
PIP4K2C	-23.1961	65.7201	-7.53807	3.13544e-13	2.46716e-12	19.3699
SERINC1	-43.5731	126.897	-7.53187	3.2689e-13	2.56599e-12	19.3291
MT-ND4	12051.6	26232.3	7.53118	3.28425e-13	2.577e-12	19.3245
SMARCC1	-28.4162	72.0582	-7.52897	3.33323e-13	2.61229e-12	19.31
UBL4A	-27.5889	76.0522	-7.5169	3.61488e-13	2.81501e-12	19.2307
UNG	-33.538	87.6606	-7.51217	3.73135e-13	2.90455e-12	19.1997
MTCH2	-25.4652	91.1488	-7.50897	3.81221e-13	2.96043e-12	19.1787
PRRC2C	-29.9567	54.7474	-7.50126	4.01452e-13	3.11014e-12	19.1281
CCNB2	-29.2353	51.4943	-7.49725	4.12377e-13	3.19225e-12	19.1019
YWHAH	-74.9178	189.281	-7.49514	4.18267e-13	3.23401e-12	19.088
HN1L	-32.0022	98.7644	-7.46991	4.95155e-13	3.79258e-12	18.923
CTNND1	-56.236	146.701	-7.46326	5.17641e-13	3.95398e-12	18.8795
SEPN1	-42.7494	118.239	-7.45979	5.29773e-13	4.0435e-12	18.8569
RAP2B	-24.8423	54.6103	-7.4593	5.31511e-13	4.0536e-12	18.8537
SBNO2	-21.5851	59.314	-7.45591	5.43668e-13	4.14148e-12	18.8315
PPP1R11	-26.5825	103.536	-7.44775	5.74096e-13	4.36309e-12	18.7783
NELFB	-37.2705	117.265	-7.44451	5.86614e-13	4.44959e-12	18.7572
CTNNB1	-76.4244	183.368	-7.4356	6.22522e-13	4.70374e-12	18.6991
RNF213	-23.1654	34.4908	-7.43507	6.24719e-13	4.71852e-12	18.6957
SF3B4	-60.7683	189.845	-7.42426	6.71321e-13	5.05491e-12	18.6253
CD47	-27.3419	53.0498	-7.38906	8.48069e-13	6.32258e-12	18.3968
SF3B1	-29.8187	98.0986	-7.38831	8.5228e-13	6.35156e-12	18.392
AHCYL1	-28.3343	83.831	-7.38508	8.70741e-13	6.47682e-12	18.371
FKBP9	-28.0408	64.4679	-7.38303	8.82637e-13	6.55784e-12	18.3578
PGM1	-26.193	53.9978	-7.38108	8.94099e-13	6.6254e-12	18.3451
MCL1	-141.285	329.396	-7.34624	1.12576e-12	8.24844e-12	18.1199
TFG	-29.6693	92.2789	-7.33738	1.19349e-12	8.72182e-12	18.0628
MCM7	-64.593	149.034	-7.3342	1.21879e-12	8.88681e-12	18.0423
PPIL1	-26.8208	72.6986	-7.33261	1.23168e-12	8.97744e-12	18.032
PPM1G	-41.767	149.894	-7.33008	1.2524e-12	9.12174e-12	18.0157
BAG6	-45.6041	165.582	-7.3284	1.26633e-12	9.21286e-12	18.0049
CLSTN1	-75.6831	168.451	-7.32252	1.31634e-12	9.5554e-12	17.9671
ESYT2	-21.4858	51.0615	-7.31981	1.34005e-12	9.70953e-12	17.9496
LRRC59	-46.1895	136.05	-7.3148	1.38492e-12	1.00161e-11	17.9174
EWSR1	-20.5372	92.4588	-7.30001	1.52634e-12	1.09781e-11	17.8224
TCP1	-41.7132	128.158	-7.29447	1.58292e-12	1.13517e-11	17.7868
LAMC1	-40.1224	77.9878	-7.293	1.5983e-12	1.14536e-11	17.7774
MT-CO1	10872.2	24259.8	7.28744	1.6577e-12	1.18706e-11	17.7417
RFC4	-22.9702	35.5019	-7.27495	1.79924e-12	1.28332e-11	17.6617
XRCC6	-82.6857	322.152	-7.27162	1.83889e-12	1.31105e-11	17.6404
PTDSS1	-21.6907	57.3275	-7.25757	2.01601e-12	1.43005e-11	17.5505
NRBP1	-24.2547	89.6555	-7.23475	2.34035e-12	1.64817e-11	17.4048
ESYT1	-33.8355	89.3025	-7.22766	2.45107e-12	1.7212e-11	17.3596
TLN1	-50.609	99.0854	-7.22637	2.47188e-12	1.73394e-11	17.3514
NAP1L4	-25.9231	99.0464	-7.22102	2.55946e-12	1.78834e-11	17.3173
EPSTI1	-23.0365	26.2676	-7.21177	2.71845e-12	1.89537e-11	17.2585
XRCC5	-52.1228	181.173	-7.18388	3.259e-12	2.253e-11	17.0813
HNRNPF	-105.851	308.374	-7.17694	3.40913e-12	2.3485e-11	17.0373
MX1	-59.8621	66.4717	-7.17462	3.46102e-12	2.38257e-11	17.0226
CDK2	-25.0676	54.4805	-7.16808	3.61087e-12	2.48223e-11	16.9812
APP	-156.251	369.596	-7.16575	3.66589e-12	2.51589e-11	16.9664
HSP90B1	-228.018	652.201	-7.16562	3.66882e-12	2.51677e-11	16.9656
GNA12	-25.3371	43.0521	-7.1652	3.67896e-12	2.52196e-11	16.9629
RPA2	-31.3254	88.1792	-7.1583	3.8471e-12	2.63446e-11	16.9193
PTGFRN	-46.5059	80.816	-7.14656	4.15067e-12	2.82358e-11	16.8451
NOLC1	-36.4432	107.773	-7.14502	4.19236e-12	2.84897e-11	16.8354
STIP1	-46.5491	149.355	-7.14376	4.22662e-12	2.86927e-11	16.8274
SLC7A1	-24.1959	33.6595	-7.14336	4.23754e-12	2.87469e-11	16.8249
MCM5	-21.6986	46.3379	-7.13763	4.3974e-12	2.97798e-11	16.7887
FARSA	-29.3176	113.339	-7.1367	4.42391e-12	2.99179e-11	16.7829
ANP32B	-120.715	343.38	-7.13149	4.57538e-12	3.08889e-11	16.75
MYO1B	-22.1119	31.2701	-7.12514	4.76688e-12	3.20492e-11	16.7099
TXNDC12	-21.2071	86.0727	-7.12348	4.81829e-12	3.23409e-11	16.6995
RAB1A	-45.296	194.862	-7.11598	5.05721e-12	3.38965e-11	16.6522
KTN1	-20.1159	52.4818	-7.11182	5.19459e-12	3.47816e-11	16.6261
NCOA4	-42.715	118.954	-7.11146	5.20671e-12	3.48508e-11	16.6238
CASC3	-25.2999	48.6711	-7.10965	5.26751e-12	3.52096e-11	16.6124
ASF1B	-25.6811	56.7287	-7.10775	5.33245e-12	3.56188e-11	16.6005
IL13RA1	-34.3106	72.1822	-7.0982	5.67077e-12	3.77542e-11	16.5404
VBP1	-30.7158	79.0278	-7.09181	5.90879e-12	3.92283e-11	16.5003
HDAC1	-39.5584	147.069	-7.09015	5.97225e-12	3.96094e-11	16.4898
ADAM15	-40.1797	95.8309	-7.08848	6.03642e-12	4.00214e-11	16.4794
IRF1	-27.7928	42.1783	-7.08841	6.03918e-12	4.00262e-11	16.479
SREBF2	-25.8295	66.6422	-7.08358	6.22989e-12	4.11372e-11	16.4486
CORO1C	-28.1404	59.3056	-7.05335	7.56301e-12	4.95887e-11	16.2593
UBA1	-57.9337	210.53	-7.03321	8.60317e-12	5.60709e-11	16.1335
RIN2	-21.092	43.1454	-7.03149	8.69861e-12	5.66364e-11	16.1228
MDH1	-23.6502	89.861	-7.02797	8.89635e-12	5.78662e-11	16.1008
TCF19	-31.7931	46.744	-7.02718	8.9415e-12	5.8102e-11	16.0959
SRSF2	-40.1576	179.68	-7.01137	9.89038e-12	6.39273e-11	15.9975
ECE1	-30.8122	76.8068	-7.00646	1.02048e-11	6.57872e-11	15.9669
TTYH3	-35.7996	79.8867	-7.00569	1.0255e-11	6.60669e-11	15.9621
TRAF7	-20.4668	68.4831	-6.99543	1.09478e-11	7.03913e-11	15.8983
MORF4L1	-23.9316	94.8748	-6.99157	1.12201e-11	7.20713e-11	15.8744
HNRNPD	-30.2907	113.548	-6.9802	1.20615e-11	7.71222e-11	15.8038
CALM2	-64.8724	191.397	-6.96924	1.29313e-11	8.2468e-11	15.7359
AARS	-45.4982	110.335	-6.95628	1.40395e-11	8.91871e-11	15.6556
SRSF4	-29.5169	126.029	-6.93661	1.59013e-11	1.00298e-10	15.5342
PPP2R4	-25.1252	99.2503	-6.93644	1.5919e-11	1.00378e-10	15.5331
BTG3	-26.4643	56.8035	-6.93173	1.64001e-11	1.03241e-10	15.504
ZNF664	-26.0543	65.6029	-6.9311	1.64658e-11	1.03559e-10	15.5001
NCSTN	-58.4542	129.278	-6.9257	1.70374e-11	1.06982e-10	15.4668
BIRC5	-30.8511	62.152	-6.92028	1.76305e-11	1.106e-10	15.4335
ADIPOR1	-33.3936	132.195	-6.91767	1.79235e-11	1.12223e-10	15.4174
PAICS	-27.1708	66.863	-6.89384	2.08292e-11	1.29217e-10	15.2708
NCL	-86.4165	286.319	-6.89235	2.10249e-11	1.30349e-10	15.2617
SPTBN1	-25.3403	50.4834	-6.88742	2.16876e-11	1.34202e-10	15.2314
LAP3	-57.4651	89.4841	-6.88706	2.17374e-11	1.34468e-10	15.2292
PSMD7	-32.3524	101.565	-6.88172	2.24794e-11	1.38927e-10	15.1965
IFI44	-66.8383	84.6679	-6.8649	2.49842e-11	1.53535e-10	15.0934
ATF6B	-36.372	129.678	-6.86384	2.51524e-11	1.54471e-10	15.0869
SUMF2	-55.3048	116.493	-6.86222	2.54094e-11	1.56001e-10	15.077
ZBTB7B	-25.2687	63.3832	-6.85384	2.67807e-11	1.64008e-10	15.0257
EIF4EBP2	-22.6657	67.2396	-6.84792	2.77919e-11	1.70042e-10	14.9896
CDC20	-73.1073	140.665	-6.84148	2.89359e-11	1.76655e-10	14.9503
GBP4	-37.2079	38.4097	-6.83812	2.95508e-11	1.80296e-10	14.9298
PPP1CC	-20.9947	70.1564	-6.83319	3.04759e-11	1.85767e-10	14.8997
HMCES	-28.7716	92.3181	-6.81849	3.34096e-11	2.02829e-10	14.8101
PPP6R1	-20.4348	64.9743	-6.79626	3.8378e-11	2.31699e-10	14.6749
HMGB2	-110.234	194.139	-6.79269	3.92417e-11	2.36768e-10	14.6533
PTPRF	-75.3992	184.238	-6.79253	3.92785e-11	2.36917e-10	14.6523
EIF5B	-27.0162	69.5072	-6.79042	3.97995e-11	2.39764e-10	14.6395
CDC25B	-56.3353	75.0141	-6.7892	4.01013e-11	2.41359e-10	14.6321
MT-ATP8	4226.53	8272.86	6.78171	4.20158e-11	2.52495e-10	14.5867
TPP1	-37.3515	95.1924	-6.75773	4.87632e-11	2.91167e-10	14.4415
USP22	-39.1933	77.4942	-6.75003	5.11467e-11	3.04471e-10	14.395
B2M	-1216.67	2244.43	-6.74652	5.22711e-11	3.10503e-10	14.3738
SMS	-72.075	160.853	-6.74405	5.30773e-11	3.15006e-10	14.3589
ELOVL5	-37.4991	63.8636	-6.74318	5.33646e-11	3.16519e-10	14.3536
TAF7	-32.5457	115.601	-6.74232	5.36492e-11	3.18111e-10	14.3485
HSP90AA1	-286.639	828.581	-6.72366	6.02127e-11	3.56166e-10	14.236
SDCBP	-34.4307	97.1996	-6.71771	6.24652e-11	3.68822e-10	14.2002
MORF4L2	-81.1217	298.31	-6.71475	6.36187e-11	3.75519e-10	14.1824
TUBG1	-29.3772	94.2849	-6.70908	6.58843e-11	3.87592e-10	14.1483
RRAGA	-57.7936	159.286	-6.70239	6.86605e-11	4.03334e-10	14.1081
SRSF9	-22.8953	88.6212	-6.69804	7.05241e-11	4.13661e-10	14.082
UHMK1	-28.6318	51.9416	-6.69072	7.37738e-11	4.31044e-10	14.0381
CHMP1B	-27.3678	78.5666	-6.6875	7.52523e-11	4.39289e-10	14.0188
LAMP1	-75.1927	238.649	-6.66076	8.8687e-11	5.13886e-10	13.8587
RNF145	-24.4444	47.608	-6.65943	8.94163e-11	5.17194e-10	13.8508
SLMO2	-32.583	103.521	-6.65327	9.28548e-11	5.36448e-10	13.814
KARS	-38.6499	148.169	-6.65139	9.39326e-11	5.42036e-10	13.8028
MAP7D1	-31.8073	90.8166	-6.64522	9.7553e-11	5.61604e-10	13.7659
MYO1D	-20.8171	48.2363	-6.63756	1.02235e-10	5.87695e-10	13.7203
OSMR	-21.0377	28.2994	-6.63136	1.06186e-10	6.09512e-10	13.6833
SEPHS1	-20.8743	55.9333	-6.62929	1.07535e-10	6.16896e-10	13.6711
MTCH1	-58.7054	216.107	-6.62435	1.10833e-10	6.35066e-10	13.6416
PNMA1	-22.6637	40.4841	-6.61793	1.15264e-10	6.59303e-10	13.6035
ILF3	-29.3703	107.828	-6.61179	1.19663e-10	6.82668e-10	13.567
RHOA	-153.349	616.731	-6.60996	1.21008e-10	6.89737e-10	13.5561
VANGL2	-21.8743	27.327	-6.59909	1.29297e-10	7.34632e-10	13.4916
CCT6A	-104.239	209.423	-6.59755	1.30512e-10	7.41322e-10	13.4825
KIF5B	-40.3693	99.8816	-6.57941	1.45747e-10	8.24034e-10	13.375
SNCG	583.619	884.16	6.5633	1.60722e-10	9.05303e-10	13.2798
HNRNPAB	-69.499	287.556	-6.55307	1.71007e-10	9.61302e-10	13.2194
C6orf62	-55.3241	158.424	-6.5447	1.79898e-10	1.00752e-09	13.1701
TMEM50A	-23.9843	124.354	-6.54445	1.80161e-10	1.00871e-09	13.1686
PNN	-21.7033	79.3119	-6.53745	1.87958e-10	1.04966e-09	13.1274
NUP210	-27.9843	40.3016	-6.53682	1.88679e-10	1.05339e-09	13.1237
TMED2	-68.5881	257.932	-6.53452	1.91318e-10	1.0669e-09	13.1101
GDI2	-84.0923	251.769	-6.52327	2.04776e-10	1.13903e-09	13.044
CAPN2	-35.0498	76.6281	-6.5232	2.04867e-10	1.13922e-09	13.0436
MTA2	-30.0085	133.238	-6.51849	2.10771e-10	1.17105e-09	13.0159
E2F4	-22.2519	79.7578	-6.51539	2.14745e-10	1.19178e-09	12.9977
CCNI	-77.4571	257.235	-6.51467	2.15686e-10	1.19666e-09	12.9935
RNASEH2A	-28.6818	73.8993	-6.50936	2.22705e-10	1.2349e-09	12.9623
TAPBP	-91.3317	231.205	-6.49918	2.36785e-10	1.30927e-09	12.9027
SLC38A1	-26.7446	67.9277	-6.49752	2.3916e-10	1.32054e-09	12.8929
TPD52L2	-29.2878	116.101	-6.49338	2.45197e-10	1.3512e-09	12.8687
AURKB	-23.4682	52.6442	-6.49311	2.45599e-10	1.35304e-09	12.8671
MLEC	-34.866	85.0321	-6.48783	2.5351e-10	1.39505e-09	12.8362
TMX2	-33.0106	120.927	-6.47449	2.74667e-10	1.50682e-09	12.7582
B4GALT5	-33.153	83.5201	-6.47251	2.7796e-10	1.52403e-09	12.7467
SUMO1	-30.5491	143.672	-6.47022	2.81803e-10	1.54424e-09	12.7333
HSPA4	-22.6972	96.2115	-6.46756	2.8633e-10	1.56773e-09	12.7178
MYBL2	-79.3427	129.566	-6.46351	2.93363e-10	1.60534e-09	12.6942
RRM2	-38.9968	65.1128	-6.45429	3.10032e-10	1.69278e-09	12.6404
ATN1	-40.8052	143.102	-6.45373	3.11067e-10	1.69795e-09	12.6372
ABCE1	-21.0106	42.8054	-6.45337	3.11743e-10	1.70117e-09	12.6351
APMAP	-70.0863	209.711	-6.43964	3.38439e-10	1.84018e-09	12.5551
EIF2S2	-48.4656	161.618	-6.43402	3.49985e-10	1.89874e-09	12.5225
KIF1C	-21.3311	63.0076	-6.42106	3.78137e-10	2.04694e-09	12.4473
ATP6AP2	-50.91	206.434	-6.41368	3.95159e-10	2.13495e-09	12.4044
PTP4A1	-39.2886	69.9984	-6.40924	4.05751e-10	2.18795e-09	12.3787
MRPL37	-37.3684	115.999	-6.40892	4.06506e-10	2.19142e-09	12.3769
EFNB2	-30.5118	46.4029	-6.39395	4.44395e-10	2.3806e-09	12.2902
SUMO2	-39.9625	183.7	-6.38566	4.66838e-10	2.49265e-09	12.2423
LAPTM4B	-83.816	175.56	-6.38117	4.79426e-10	2.55777e-09	12.2165
POLD2	-35.3056	104.683	-6.38015	4.82343e-10	2.57263e-09	12.2106
UBE2H	-22.1674	80.0131	-6.36946	5.13928e-10	2.73662e-09	12.1489
DDOST	-108.993	397.842	-6.36429	5.29911e-10	2.81637e-09	12.1191
NARS	-33.8244	122.936	-6.36295	5.34149e-10	2.83812e-09	12.1114
PSMD11	-34.4301	70.0907	-6.35977	5.44285e-10	2.88884e-09	12.0931
SAMD9	-22.9895	24.6964	-6.35577	5.57334e-10	2.9533e-09	12.0701
RBM8A	-20.9625	82.7792	-6.34881	5.80747e-10	3.0757e-09	12.0301
STOML2	-66.8475	200.829	-6.3367	6.23817e-10	3.29578e-09	11.9605
NOP56	-26.0719	88.4553	-6.33631	6.25243e-10	3.30064e-09	11.9583
ADPRHL2	-21.8948	103.178	-6.33123	6.44284e-10	3.39475e-09	11.9291
CTSS	-50.7745	89.4144	-6.32719	6.59822e-10	3.47009e-09	11.906
TMEM14A	-32.0675	90.5275	-6.32316	6.75706e-10	3.54981e-09	11.8828
CCT8	-50.6732	208.629	-6.31908	6.9215e-10	3.6323e-09	11.8595
PPP1R9B	-23.3749	71.4426	-6.30876	7.35466e-10	3.8524e-09	11.8005
2023-09-02	-36.0807	137.977	-6.29959	7.76224e-10	4.05504e-09	11.7481
E2F1	-32.2013	49.5363	-6.2876	8.32877e-10	4.33021e-09	11.6796
LCP1	-67.7679	100.966	-6.28703	8.35633e-10	4.34223e-09	11.6764
ARPC1A	-49.4309	201.923	-6.2748	8.97787e-10	4.6504e-09	11.6067
NFE2L2	-27.991	78.0149	-6.26579	9.46414e-10	4.89451e-09	11.5554
CCT4	-79.4028	223.618	-6.25877	9.86094e-10	5.08629e-09	11.5155
MYH9	-149.069	442.668	-6.23732	1.11766e-09	5.73468e-09	11.3939
CALR	-378.716	1439.55	-6.21735	1.2555e-09	6.41677e-09	11.2809
PLIN3	-36.561	108.238	-6.21576	1.26721e-09	6.47152e-09	11.2719
CDC123	-32.31	113.397	-6.20759	1.3288e-09	6.77371e-09	11.2258
ITGAV	-23.263	50.5211	-6.20502	1.34879e-09	6.86665e-09	11.2113
CCDC47	-26.2928	92.3182	-6.20468	1.35146e-09	6.87667e-09	11.2094
HMGN1	-34.0556	121.068	-6.19135	1.46016e-09	7.40671e-09	11.1342
HNRNPDL	-27.1702	124.052	-6.19038	1.46838e-09	7.44262e-09	11.1288
RAB10	-54.275	193.743	-6.18434	1.5207e-09	7.6899e-09	11.0948
MT-ND1	6457.41	12381.2	6.18237	1.53817e-09	7.7702e-09	11.0837
EIF3B	-28.8974	106.102	-6.18151	1.54585e-09	7.80496e-09	11.0789
MRPS10	-26.1272	71.932	-6.17495	1.60565e-09	8.0902e-09	11.042
ACTN4	-131.08	354.075	-6.17374	1.61696e-09	8.14092e-09	11.0352
CTPS1	-20.9113	39.951	-6.16304	1.72008e-09	8.6401e-09	10.9752
GLMP	-23.1362	54.9355	-6.15954	1.75521e-09	8.80978e-09	10.9555
OPTN	-31.723	69.2327	-6.15535	1.79816e-09	9.00921e-09	10.9321
CMAS	-24.5494	87.5473	-6.15468	1.80522e-09	9.04226e-09	10.9283
HSPH1	-37.4598	75.2974	-6.15119	1.84184e-09	9.20686e-09	10.9088
YWHAE	-111.223	445.233	-6.14522	1.90644e-09	9.50311e-09	10.8753
RAB6A	-28.568	97.7793	-6.14111	1.95208e-09	9.71821e-09	10.8523
PCBP2	-25.7256	119.417	-6.12653	2.12292e-09	1.05286e-08	10.7709
UBE2T	-33.4473	73.8974	-6.12641	2.12447e-09	1.05336e-08	10.7702
SARS	-28.0519	114.601	-6.12392	2.15503e-09	1.06743e-08	10.7563
HIF1A	-69.0931	125.874	-6.12245	2.17335e-09	1.07596e-08	10.7481
CLIC4	-53.9323	97.2366	-6.11776	2.23277e-09	1.10398e-08	10.7219
SIGMAR1	-46.5241	131.858	-6.08229	2.73607e-09	1.34233e-08	10.5247
RTN3	-35.2089	94.1774	-6.07945	2.78082e-09	1.36239e-08	10.5089
MYD88	-25.8648	77.7956	-6.07718	2.81704e-09	1.37964e-08	10.4964
NCK2	-21.1783	66.2315	-6.07272	2.88981e-09	1.41281e-08	10.4716
SDC3	-20.9571	38.6817	-6.06704	2.98504e-09	1.45754e-08	10.4402
HDLBP	-36.666	134.026	-6.06426	3.03276e-09	1.48011e-08	10.4248
USP7	-24.2265	59.3637	-6.06023	3.10326e-09	1.51225e-08	10.4025
SLC16A1	-34.8873	39.6143	-6.04725	3.3414e-09	1.62426e-08	10.3308
SERF2	55.8572	223.97	6.04649	3.35588e-09	1.63048e-08	10.3266
MRPS16	-25.3647	93.8673	-6.03219	3.64012e-09	1.7616e-08	10.2477
PEX19	-27.7134	63.1617	-6.03211	3.64176e-09	1.76196e-08	10.2473
PGK1	-126.745	309.863	-6.02504	3.791e-09	1.83099e-08	10.2083
IFIT3	-66.1857	73.5187	-6.02428	3.80738e-09	1.838e-08	10.2042
HSPA9	-43.4772	162.686	-6.02399	3.81369e-09	1.84059e-08	10.2026
SRP9	-57.5943	255.911	-6.0188	3.92753e-09	1.8918e-08	10.174
ANXA5	-105.625	226.433	-6.015	4.01322e-09	1.93071e-08	10.1531
TBL1XR1	-24.3419	55.9598	-6.00503	4.24637e-09	2.03537e-08	10.0983
LRP10	-29.2562	96.4162	-5.99898	4.39415e-09	2.10158e-08	10.0652
LDHA	-158.147	331.563	-5.99517	4.48981e-09	2.14418e-08	10.0443
GSPT1	-22.6516	60.2082	-5.99499	4.49446e-09	2.14536e-08	10.0433
SHC1	-69.3313	129.127	-5.97581	5.00849e-09	2.37797e-08	9.93829
TWF1	-24.3058	63.6038	-5.96546	5.3092e-09	2.51465e-08	9.88176
UBC	-127.097	573.691	-5.96159	5.42605e-09	2.56751e-08	9.86066
RRBP1	-46.6188	152.026	-5.93844	6.18002e-09	2.90881e-08	9.73455
CDKN2A	-48.5907	51.8119	-5.93814	6.19048e-09	2.91234e-08	9.73291
GIT1	-21.1054	65.7222	-5.93241	6.39271e-09	3.00099e-08	9.70176
ZNF622	-20.8965	71.9277	-5.92363	6.71484e-09	3.14618e-08	9.65411
IVNS1ABP	-29.1841	67.4878	-5.90906	7.28521e-09	3.40527e-08	9.57512
PSMC3	-51.838	198.482	-5.90791	7.33206e-09	3.42635e-08	9.5689
PGRMC1	-72.3179	250.356	-5.90295	7.53819e-09	3.51597e-08	9.54204
PIGT	-81.3223	249.519	-5.89867	7.72073e-09	3.59854e-08	9.51886
CKAP4	-58.4624	160.429	-5.89826	7.73828e-09	3.60586e-08	9.51666
PSMB5	-63.9821	244.376	-5.88283	8.43339e-09	3.91393e-08	9.43333
GDI1	-27.6592	100.638	-5.87885	8.62236e-09	3.99595e-08	9.41186
MSN	-101.056	156.723	-5.87381	8.86757e-09	4.10571e-08	9.3847
CLPTM1	-27.0685	112.114	-5.86186	9.47672e-09	4.37533e-08	9.32034
CDKN2B	-30.6016	32.4359	-5.84967	1.01397e-08	4.66824e-08	9.25485
SLC35B2	-35.6453	118.214	-5.8477	1.02512e-08	4.71621e-08	9.24427
SCARB2	-40.1714	133.205	-5.84244	1.05545e-08	4.85119e-08	9.21603
VSIG2	170.468	257.662	5.83957	1.07235e-08	4.92425e-08	9.20065
TRAFD1	-23.6351	59.9287	-5.83503	1.09963e-08	5.04127e-08	9.17631
HNRNPH2	-26.9917	134.561	-5.8252	1.16108e-08	5.31425e-08	9.12367
PEF1	-26.5573	126.296	-5.8195	1.19818e-08	5.47642e-08	9.09321
RPS28	154.198	478.16	5.81495	1.22864e-08	5.60777e-08	9.0689
CDC42	-48.1636	254.047	-5.80567	1.29314e-08	5.8851e-08	9.01937
2023-09-15	-49.3928	243.438	-5.78942	1.41421e-08	6.41288e-08	8.93274
CD276	-21.8112	69.9351	-5.78628	1.43883e-08	6.5155e-08	8.91603
PGM2	-21.2181	59.9617	-5.78488	1.44992e-08	6.56117e-08	8.9086
H2AFZ	-111.625	360.919	-5.77936	1.49454e-08	6.75057e-08	8.87927
PLEC	-48.6315	123.288	-5.77768	1.50844e-08	6.8118e-08	8.8703
HLA-E	-309.282	850.331	-5.77504	1.5304e-08	6.90621e-08	8.85631
EHF	-38.51	63.8229	-5.76633	1.60537e-08	7.22287e-08	8.81003
MAGEF1	-35.6637	119.156	-5.76305	1.63444e-08	7.34697e-08	8.79266
MAFB	-27.2172	38.9492	-5.7592	1.66929e-08	7.4967e-08	8.77225
SBDS	-29.5238	126.052	-5.75495	1.70853e-08	7.66237e-08	8.74976
TNFSF10	-119.875	163.657	-5.7393	1.86122e-08	8.31859e-08	8.66694
KLF6	-47.9061	110.804	-5.73598	1.89523e-08	8.46671e-08	8.64942
SNRPC	-55.2352	226.029	-5.7357	1.89815e-08	8.47782e-08	8.64793
STMN1	-101.586	172.46	-5.71857	2.08397e-08	9.27394e-08	8.55758
ERH	-48.6432	238.197	-5.71757	2.09528e-08	9.31789e-08	8.55235
CREB3	-22.9548	82.4461	-5.71274	2.15109e-08	9.55743e-08	8.52692
RANGAP1	-28.4699	122.988	-5.70705	2.21877e-08	9.84472e-08	8.49695
GOLM1	-36.065	81.2233	-5.70333	2.26402e-08	1.00273e-07	8.47742
PSMA3	-21.4876	96.7902	-5.69957	2.31075e-08	1.02181e-07	8.45767
MT-ND6	3108.41	5937.08	5.69719	2.34082e-08	1.03394e-07	8.44516
FLNB	-49.9377	109.841	-5.68931	2.44304e-08	1.0757e-07	8.40383
TMEM109	-50.6852	171.444	-5.67642	2.61981e-08	1.14888e-07	8.33627
ALDH9A1	-26.4476	73.663	-5.67082	2.70038e-08	1.18315e-07	8.30698
PTTG1	-31.8341	72.616	-5.6627	2.8216e-08	1.23406e-07	8.26453
S100A6	3721.2	8114.59	5.65182	2.99229e-08	1.30492e-07	8.20774
TOMM20	-43.8235	186.546	-5.6423	3.14984e-08	1.36997e-07	8.15814
CTDNEP1	-27.4751	131.818	-5.63967	3.19479e-08	1.38921e-07	8.14444
B4GALT1	-56.7564	169.265	-5.6395	3.19774e-08	1.39018e-07	8.14355
PPDPF	396.709	1244.11	5.63909	3.20485e-08	1.39235e-07	8.1414
PFN2	-59.8977	143.995	-5.63291	3.31316e-08	1.43717e-07	8.10928
RPL28	157.054	533.12	5.62984	3.36844e-08	1.4605e-07	8.09328
CACYBP	-20.0997	66.6156	-5.62641	3.43098e-08	1.4863e-07	8.0755
PSMA7	-95.781	406.13	-5.62456	3.46529e-08	1.49951e-07	8.06589
SMIM22	58.192	95.341	5.61945	3.56177e-08	1.53854e-07	8.03935
C5orf15	-32.7065	100.787	-5.60774	3.79271e-08	1.63361e-07	7.97864
DRG1	-25.8646	93.0168	-5.60392	3.87108e-08	1.66517e-07	7.95887
COPG1	-39.5901	184.889	-5.60349	3.88013e-08	1.6687e-07	7.95662
PSMB8	-82.7006	189.565	-5.60267	3.89717e-08	1.67565e-07	7.95238
GHITM	-49.512	210.185	-5.60002	3.95281e-08	1.69734e-07	7.93868
TEAD2	-27.0638	41.168	-5.59729	4.01103e-08	1.72121e-07	7.92456
RPS15	160.043	552.682	5.59459	4.06947e-08	1.74438e-07	7.91058
MT-ND4L	3255.16	7225.68	5.58725	4.23231e-08	1.81101e-07	7.87267
PSAT1	-30.8206	57.8433	-5.58584	4.26434e-08	1.82312e-07	7.86539
CCT7	-60.5177	273.469	-5.58486	4.28683e-08	1.83194e-07	7.86031
ENO1	-476.05	1401.53	-5.58295	4.33076e-08	1.8495e-07	7.85046
MICALL1	-22.5988	65.0325	-5.58242	4.34298e-08	1.85391e-07	7.84774
RPL18	177.415	706.991	5.5708	4.62079e-08	1.96778e-07	7.78784
HSPD1	-77.5721	252.977	-5.56955	4.6518e-08	1.97969e-07	7.78137
MRPS18B	-29.3161	116.334	-5.56829	4.6832e-08	1.99132e-07	7.77488
DPM1	-29.8568	123.245	-5.55049	5.14857e-08	2.1788e-07	7.68337
LIMA1	-34.9999	82.1747	-5.54246	5.37319e-08	2.26748e-07	7.64213
RAB1B	-63.539	341.415	-5.54034	5.43376e-08	2.29206e-07	7.63131
TRIM28	-106.833	350.038	-5.53992	5.44589e-08	2.29668e-07	7.62916
SNX17	-20.3848	108.31	-5.53138	5.69836e-08	2.39953e-07	7.5854
ALYREF	-57.8821	204.533	-5.52486	5.89878e-08	2.4802e-07	7.55202
TPI1	-222.175	826.044	-5.51401	6.24735e-08	2.61888e-07	7.49659
TM9SF4	-25.5229	83.026	-5.50722	6.47593e-08	2.71007e-07	7.4619
DSP	-176.445	199.931	-5.5057	6.52806e-08	2.73013e-07	7.45416
UQCRFS1	-24.8962	65.9321	-5.49566	6.88341e-08	2.87139e-07	7.40299
FH	-23.2152	102.994	-5.49496	6.90859e-08	2.88066e-07	7.39947
DDX5	-62.2951	267.962	-5.47885	7.52071e-08	3.12392e-07	7.31753
HSP90AB1	-453.552	1724.17	-5.47568	7.647e-08	3.17369e-07	7.30146
UBE2C	-83.0862	222.3	-5.47196	7.79821e-08	3.23439e-07	7.28256
GARS	-36.1099	113.186	-5.46386	8.13707e-08	3.36709e-07	7.24152
TMA7	76.5532	318.635	5.46226	8.20567e-08	3.39476e-07	7.23342
URI1	-27.6664	56.6094	-5.45318	8.60622e-08	3.55147e-07	7.18743
PLP2	-200.761	543.51	-5.43996	9.2228e-08	3.79472e-07	7.12068
CDK2AP1	-25.2012	94.6493	-5.42326	1.0064e-07	4.12176e-07	7.03648
FOSL2	-49.6056	132.942	-5.42317	1.00683e-07	4.12267e-07	7.03607
ACTB	-1495.65	5668.69	-5.41982	1.02462e-07	4.19225e-07	7.01917
SRRM2	-26.9603	116.051	-5.41027	1.07689e-07	4.39483e-07	6.97119
RPLP1	403.394	1518.42	5.39493	1.16633e-07	4.7427e-07	6.89425
AK3	-20.3827	56.2406	-5.39491	1.16648e-07	4.7427e-07	6.89412
MRPS35	-27.2183	102.513	-5.38626	1.22009e-07	4.94936e-07	6.8508
HLA-C	-798.277	1754.56	-5.38576	1.22327e-07	4.96123e-07	6.84829
ASNA1	-24.9706	136.908	-5.37987	1.26117e-07	5.11072e-07	6.81887
DAZAP2	-32.2345	145.303	-5.377	1.28012e-07	5.18215e-07	6.80449
SRPR	-25.245	130.821	-5.37293	1.30741e-07	5.28604e-07	6.78416
2023-09-09	-26.5658	110.197	-5.37229	1.31171e-07	5.30236e-07	6.78099
PEA15	-93.9744	274.943	-5.36674	1.34992e-07	5.44578e-07	6.75332
PSMB9	-55.4998	79.8859	-5.36496	1.36247e-07	5.49279e-07	6.7444
LMF2	-24.2253	104.865	-5.34931	1.47722e-07	5.93706e-07	6.66646
ACTG1	-859.986	4546.02	-5.3448	1.51197e-07	6.06803e-07	6.64405
TNIP1	-21.5827	81.9407	-5.32752	1.65275e-07	6.61673e-07	6.55827
RMI2	-20.288	35.388	-5.31509	1.76175e-07	7.02728e-07	6.49673
CDH3	-84.5302	105.507	-5.31258	1.78461e-07	7.10974e-07	6.48431
MAGOH	-20.6107	91.1023	-5.30612	1.84467e-07	7.3371e-07	6.45242
TP53	-22.5852	66.9789	-5.30317	1.87285e-07	7.44615e-07	6.43782
RTCB	-34.9517	102.639	-5.29913	1.91197e-07	7.59244e-07	6.41791
HIST1H2AC	-48.8268	87.5104	-5.29515	1.95136e-07	7.74571e-07	6.39827
FAM32A	-25.681	148.331	-5.2923	1.97997e-07	7.85132e-07	6.38425
GLTSCR2	53.6261	192.469	5.28004	2.10809e-07	8.33407e-07	6.32386
HADHA	-36.3981	194.876	-5.27796	2.13059e-07	8.41622e-07	6.31364
SECTM1	-34.3698	38.6281	-5.27375	2.17683e-07	8.59022e-07	6.29296
TMEM30A	-25.0001	101.283	-5.27127	2.20451e-07	8.69067e-07	6.2808
RIOK3	-21.0523	52.1474	-5.27075	2.21044e-07	8.71056e-07	6.27821
YWHAB	-113.828	388.271	-5.26637	2.26028e-07	8.89979e-07	6.25674
PHC2	-25.1917	89.029	-5.25801	2.35866e-07	9.26852e-07	6.21572
RNF11	-22.4457	91.5445	-5.25624	2.37999e-07	9.34484e-07	6.20705
EIF3L	-28.7673	89.8786	-5.25354	2.41288e-07	9.46259e-07	6.19384
HLA-B	-1343.47	2411.27	-5.25247	2.42606e-07	9.50859e-07	6.18859
HPRT1	-44.4673	93.3561	-5.24553	2.51313e-07	9.82427e-07	6.15465
RPL14	58.8108	240.847	5.24167	2.56292e-07	1.00109e-06	6.13577
CLPTM1L	-33.9063	83.2579	-5.23762	2.61611e-07	1.02085e-06	6.11599
GTF3C5	-26.9789	80.1015	-5.23494	2.65197e-07	1.03361e-06	6.10289
ARF1	-78.8748	531.916	-5.23186	2.69366e-07	1.04881e-06	6.08788
PFKP	-49.0545	118.463	-5.21997	2.86079e-07	1.1108e-06	6.02994
MT-ND5	2201.61	4709.31	5.21742	2.89796e-07	1.12389e-06	6.01752
C16orf13	26.0651	100.046	5.21619	2.91602e-07	1.13045e-06	6.01154
PES1	-26.2336	82.0132	-5.2068	3.05782e-07	1.18261e-06	5.96585
TM7SF3	-32.0594	69.2444	-5.19293	3.27928e-07	1.26377e-06	5.89858
AZIN1	-29.5857	92.5753	-5.18872	3.34968e-07	1.28912e-06	5.87815
EIF4A2	-52.7212	157.844	-5.18552	3.40392e-07	1.30974e-06	5.86269
CNN3	-67.3223	162.696	-5.1832	3.44402e-07	1.32465e-06	5.85143
ATP5D	42.3812	117.964	5.16713	3.73348e-07	1.43176e-06	5.77381
TFRC	-63.535	102.582	-5.14855	4.0978e-07	1.56352e-06	5.68427
KDELR2	-54.2102	256.431	-5.12947	4.50758e-07	1.70988e-06	5.59264
KDM1A	-27.5072	99.8905	-5.12561	4.59522e-07	1.74143e-06	5.57413
RPL29	278.542	1057.44	5.12094	4.70337e-07	1.7807e-06	5.55177
ITGA6	-69.06	110.069	-5.11993	4.72716e-07	1.78936e-06	5.54692
TSR2	-23.6497	124.724	-5.11063	4.95112e-07	1.86872e-06	5.50244
ERAL1	-31.0956	107.355	-5.1081	5.01381e-07	1.89129e-06	5.49034
TUFT1	-24.4503	57.0997	-5.09707	5.29612e-07	1.99393e-06	5.4377
ARL8B	-24.645	109.51	-5.0916	5.44174e-07	2.04758e-06	5.41164
SLC7A5	-114.465	174.827	-5.07905	5.79073e-07	2.17138e-06	5.35192
FAM174B	32.0509	57.7992	5.06959	6.06814e-07	2.27019e-06	5.30697
CAPS	50.3827	101.912	5.06746	6.13245e-07	2.29338e-06	5.29684
PLOD2	-25.0403	34.9044	-5.06252	6.28369e-07	2.3468e-06	5.27344
TK1	-59.5718	175.482	-5.05515	6.51637e-07	2.43184e-06	5.23852
HIST1H2BK	-135.661	234.114	-5.05155	6.63284e-07	2.47437e-06	5.22151
LRRC8A	-30.6918	70.2552	-5.04951	6.69997e-07	2.49893e-06	5.21184
ICAM1	-44.2447	58.2089	-5.03508	7.19266e-07	2.67607e-06	5.1437
BAK1	-21.4407	67.3259	-5.03162	7.31607e-07	2.72095e-06	5.12737
ATP5I	136.963	376.048	5.0307	7.34922e-07	2.73172e-06	5.12303
MYL12A	-75.995	281.498	-5.02543	7.54176e-07	2.79692e-06	5.0982
CDC42EP4	-20.6834	57.901	-5.01451	7.95646e-07	2.94514e-06	5.04682
DDX17	-31.2456	134.74	-5.01389	7.9806e-07	2.95351e-06	5.04391
AP2M1	-59.1385	319.151	-5.0135	7.9958e-07	2.95747e-06	5.04208
ITGA2	-22.4734	34.0838	-5.01273	8.02598e-07	2.96583e-06	5.03847
AAMP	-24.1004	139.121	-5.00385	8.38256e-07	3.08711e-06	4.99674
PAF1	-25.3537	112.59	-5.00296	8.41898e-07	3.09936e-06	4.99258
FZD6	-22.6661	61.118	-5.00037	8.52616e-07	3.13704e-06	4.98044
TES	-34.0234	76.1089	-4.99847	8.60551e-07	3.16394e-06	4.97155
ARF4	-60.5173	263.072	-4.98971	8.98136e-07	3.29448e-06	4.93053
FABP6	23.9379	35.1389	4.9817	9.33904e-07	3.42198e-06	4.89306
GJB3	-35.6684	80.4711	-4.98133	9.35612e-07	3.4276e-06	4.89131
WDR45B	-29.2767	122.019	-4.98124	9.36008e-07	3.42841e-06	4.8909
UAP1	-30.8014	64.6851	-4.97775	9.52054e-07	3.48357e-06	4.87459
FERMT1	-20.5001	46.5518	-4.97773	9.52134e-07	3.48357e-06	4.87451
ARRDC3	-20.2648	48.4184	-4.96561	1.00995e-06	3.68545e-06	4.81796
CARHSP1	-28.9706	58.4794	-4.96519	1.01201e-06	3.69162e-06	4.816
EIF4B	-31.7372	133.307	-4.96114	1.03209e-06	3.76064e-06	4.79716
LITAF	-35.531	106.091	-4.95874	1.04419e-06	3.80189e-06	4.78599
FKBP2	47.4483	168.859	4.94182	1.13339e-06	4.10988e-06	4.70737
PUF60	-24.1024	115.915	-4.94151	1.13512e-06	4.11538e-06	4.7059
RPL13	175.719	629.739	4.94041	1.14119e-06	4.13511e-06	4.70079
CD82	-39.505	85.3149	-4.93789	1.15519e-06	4.18427e-06	4.6891
MGST2	22.2756	73.8746	4.93706	1.15981e-06	4.19867e-06	4.68527
ARL6IP1	-77.4655	269.846	-4.93311	1.18214e-06	4.27401e-06	4.66698
CHMP2B	-26.0543	68.8368	-4.93045	1.19743e-06	4.32689e-06	4.65466
POLR2G	-24.5229	122.185	-4.92807	1.21129e-06	4.37375e-06	4.64363
PSMD8	-54.7487	189.987	-4.91294	1.30298e-06	4.68667e-06	4.57368
ESRP1	-29.13	101.972	-4.91097	1.31539e-06	4.72871e-06	4.56459
ACTN1	-40.5968	94.7385	-4.91028	1.31978e-06	4.74361e-06	4.5614
PRDX6	-93.8053	339.543	-4.90616	1.34617e-06	4.83666e-06	4.54243
TNFAIP3	-25.9904	41.5837	-4.90589	1.34796e-06	4.84135e-06	4.54115
LSM2	-35.9159	148.361	-4.90221	1.37197e-06	4.92304e-06	4.52423
PTK7	-29.0916	54.6497	-4.89508	1.41984e-06	5.08458e-06	4.49136
LAMA3	-45.0177	34.6683	-4.89022	1.45331e-06	5.19904e-06	4.46903
IFNGR2	-31.094	137.66	-4.88299	1.50459e-06	5.3743e-06	4.43581
TRPC4AP	-56.5971	133.29	-4.88257	1.50764e-06	5.38226e-06	4.43387
TP63	-36.3746	67.7311	-4.87068	1.59591e-06	5.6829e-06	4.37935
TMEM43	-31.3949	118.665	-4.86926	1.60674e-06	5.71939e-06	4.37287
STT3B	-33.0449	131.746	-4.86608	1.63134e-06	5.79991e-06	4.35832
FAM129B	-85.4577	271.902	-4.85967	1.68205e-06	5.96685e-06	4.32899
HMGA1	-222.701	534.381	-4.85914	1.68637e-06	5.98001e-06	4.32654
TYMP	-104.92	169.636	-4.85891	1.68818e-06	5.98535e-06	4.32551
IRF7	-26.7909	54.4678	-4.84439	1.8092e-06	6.39473e-06	4.2592
PPT1	-51.2409	154.088	-4.8422	1.8281e-06	6.45686e-06	4.24925
FKBP4	-41.0386	145.652	-4.84049	1.84303e-06	6.50795e-06	4.24147
APEX1	-50.4726	274.797	-4.83533	1.88888e-06	6.66072e-06	4.21794
PTP4A2	-27.3065	122.689	-4.83158	1.92283e-06	6.77315e-06	4.20088
AHCY	-57.4829	184.501	-4.82974	1.93963e-06	6.82843e-06	4.19255
CAV2	-20.2708	34.9976	-4.82685	1.96648e-06	6.91568e-06	4.17939
USMG5	45.3845	244.382	4.82272	2.00535e-06	7.0486e-06	4.16065
DNAJB1	-56.2055	161.362	-4.81456	2.08448e-06	7.30836e-06	4.1236
TCEB2	115.459	458.339	4.81172	2.11264e-06	7.40046e-06	4.11076
PRDX3	-21.2726	101.369	-4.79667	2.2685e-06	7.92237e-06	4.04263
CXCL9	-102.614	80.8602	-4.79139	2.32576e-06	8.11511e-06	4.01878
PSMD3	-40.2746	130.208	-4.78874	2.35498e-06	8.20974e-06	4.00684
ZFP36L1	-70.5079	254.458	-4.78039	2.44944e-06	8.53144e-06	3.96921
PGAM1	-20.1111	67.2299	-4.77853	2.47106e-06	8.59909e-06	3.9608
PHB	-22.3263	113.057	-4.76286	2.65994e-06	9.21872e-06	3.89034
H1FX	-83.1212	320.993	-4.75802	2.72108e-06	9.41726e-06	3.86861
AIM1	-23.2791	37.756	-4.75411	2.77142e-06	9.58472e-06	3.85108
MET	-38.8644	45.8814	-4.74521	2.88941e-06	9.97692e-06	3.81121
ADAM9	-27.0637	59.3825	-4.7344	3.03917e-06	1.04627e-05	3.76289
RPL34	107.539	427.33	4.73052	3.09478e-06	1.06371e-05	3.74556
HLA-A	-784.794	1755.57	-4.70167	3.53979e-06	1.20947e-05	3.61715
PDIA3	-89.5043	463.574	-4.70043	3.56014e-06	1.21579e-05	3.61167
MPZL1	-23.4206	82.4928	-4.68349	3.85108e-06	1.30943e-05	3.53662
COL17A1	-88.2326	86.306	-4.6827	3.86526e-06	1.31403e-05	3.53311
UQCRC2	-20.6851	93.9776	-4.68146	3.88749e-06	1.3209e-05	3.52763
H3F3B	-82.2796	423.229	-4.67575	3.99148e-06	1.35411e-05	3.50242
HLA-F	-48.5763	80.7183	-4.67474	4.0102e-06	1.36e-05	3.49795
ARHGDIA	-57.3212	332.997	-4.67448	4.01508e-06	1.36118e-05	3.49679
IFITM10	23.6152	34.4747	4.67317	4.03949e-06	1.36803e-05	3.491
PSMD4	-54.2726	218.483	-4.67307	4.04134e-06	1.36842e-05	3.49056
TUBB2A	-21.3672	42.8863	-4.6688	4.12177e-06	1.39421e-05	3.47174
SHKBP1	-26.4921	95.4455	-4.65271	4.4392e-06	1.49693e-05	3.40089
TMBIM6	-93.5312	495.705	-4.65182	4.45758e-06	1.50287e-05	3.39695
RPS2	297.603	1370.71	4.65089	4.47663e-06	1.50825e-05	3.39287
RPL24	139.046	719.958	4.64097	4.68574e-06	1.57518e-05	3.34929
ATP5F1	-21.5381	132.823	-4.63779	4.75459e-06	1.59751e-05	3.33536
CHMP1A	-28.3149	155.006	-4.62971	4.93436e-06	1.65422e-05	3.29994
CHCHD2	-157.896	635.396	-4.6294	4.94138e-06	1.65629e-05	3.29858
RPL9	97.81	427.349	4.62483	5.04582e-06	1.68956e-05	3.27862
DCTPP1	-24.8938	101.426	-4.62019	5.1542e-06	1.72379e-05	3.25834
APOA1BP	-34.8999	168.682	-4.61828	5.19957e-06	1.73748e-05	3.24998
MYO1C	-20.1499	89.5325	-4.61763	5.21494e-06	1.74192e-05	3.24716
PSME1	-98.0417	423.663	-4.61714	5.22674e-06	1.74537e-05	3.245
PRNP	-117.951	227.952	-4.60216	5.59711e-06	1.86237e-05	3.17968
RNF167	-23.9984	126.343	-4.56914	6.50458e-06	2.14863e-05	3.03637
NT5E	-27.1293	28.1686	-4.5612	6.74288e-06	2.22509e-05	3.00207
UPK2	725.178	983.507	4.5538	6.97262e-06	2.29588e-05	2.97013
RAC1	-69.8846	417.928	-4.55286	7.00248e-06	2.30455e-05	2.96606
ETS2	-60.5679	168.964	-4.54439	7.27564e-06	2.39244e-05	2.92958
MBOAT1	-20.7722	21.6744	-4.5413	7.37781e-06	2.42224e-05	2.91629
OSTF1	-23.5439	138.208	-4.532	7.69399e-06	2.51985e-05	2.8763
PPP2R1A	-25.496	166.083	-4.52845	7.818e-06	2.55917e-05	2.86107
PSMB4	-108.698	456.329	-4.52784	7.83958e-06	2.56581e-05	2.85844
PRPF6	-26.0963	168.976	-4.52222	8.0404e-06	2.62759e-05	2.83434
SEC16A	-23.0705	42.3756	-4.51977	8.12955e-06	2.65628e-05	2.82384
IFI6	-793.693	1190.95	-4.51823	8.18594e-06	2.67337e-05	2.81725
OAS1	-43.6255	89.5889	-4.507	8.6095e-06	2.80328e-05	2.76919
SMARCB1	-27.3186	129.588	-4.50193	8.80727e-06	2.86434e-05	2.74756
LAMTOR4	37.8952	149.386	4.49975	8.89361e-06	2.89002e-05	2.73827
RAB31	-25.4206	57.2917	-4.49788	8.96866e-06	2.91247e-05	2.73027
IFNGR1	-36.4363	119.684	-4.48531	9.48717e-06	3.0727e-05	2.67675
YBX3	-25.728	100.479	-4.47296	1.0025e-05	3.23939e-05	2.62426
AIM2	-26.6471	37.8466	-4.46482	1.0395e-05	3.35286e-05	2.58976
RPS20	209.197	1056.29	4.46162	1.05441e-05	3.39706e-05	2.5762
PLA2G2F	34.9319	50.7599	4.45776	1.07267e-05	3.45188e-05	2.55987
AHNAK	-85.1974	133.115	-4.45301	1.09557e-05	3.51982e-05	2.53976
ODC1	-55.9636	103.153	-4.43977	1.16183e-05	3.7217e-05	2.4839
SNN	-24.9334	48.3262	-4.43383	1.19282e-05	3.81536e-05	2.45885
DBN1	-25.7835	60.0709	-4.4326	1.1993e-05	3.83421e-05	2.4537
IFIT1	-22.3238	27.0351	-4.43235	1.20064e-05	3.83785e-05	2.45264
CXCL16	-28.0834	75.943	-4.4309	1.20836e-05	3.86002e-05	2.44654
ST13	-26.3387	145.668	-4.42757	1.22629e-05	3.91234e-05	2.43254
JAG1	-36.1726	64.7252	-4.41798	1.27937e-05	4.07356e-05	2.39224
ATP1B1	-79.4107	167.164	-4.41041	1.32281e-05	4.20093e-05	2.36049
CDC42EP5	45.2303	84.8992	4.40952	1.32795e-05	4.21592e-05	2.3568
HLA-DRA	-800.72	1374.54	-4.40738	1.34054e-05	4.25242e-05	2.34783
DNASE2	-22.8566	103.912	-4.39961	1.3872e-05	4.39456e-05	2.3153
HK1	-23.5415	106.442	-4.39907	1.39047e-05	4.40295e-05	2.31307
UPK1A	348.582	431.267	4.39365	1.42398e-05	4.50181e-05	2.29043
PKP3	-46.5758	127.819	-4.38942	1.45071e-05	4.57893e-05	2.27275
LAPTM4A	-95.9894	557.86	-4.38682	1.46736e-05	4.62922e-05	2.26191
RAF1	-23.5232	57.6294	-4.38404	1.48536e-05	4.67848e-05	2.25032
ATP1B3	-78.9523	219.521	-4.38291	1.49271e-05	4.70086e-05	2.24563
RPL36	205.658	750.951	4.3818	1.49999e-05	4.72152e-05	2.241
BAG3	-25.2302	97.4354	-4.36696	1.60067e-05	5.02148e-05	2.17928
OSTC	-29.9866	166.357	-4.3632	1.62717e-05	5.09807e-05	2.16368
OS9	-40.9036	186.416	-4.36194	1.63619e-05	5.12387e-05	2.15843
RCC1	-28.2126	81.0927	-4.36025	1.64827e-05	5.16006e-05	2.15144
BLVRA	-20.6992	65.8832	-4.35965	1.65257e-05	5.17269e-05	2.14897
ATP5B	-159.516	841.474	-4.34979	1.7252e-05	5.38886e-05	2.10811
RAB38	-30.1557	50.8281	-4.34556	1.75728e-05	5.48292e-05	2.09062
MAGEA3	-25.3897	36.5081	-4.33579	1.83358e-05	5.71007e-05	2.05026
NME3	28.0232	92.5923	4.3322	1.8624e-05	5.79613e-05	2.03546
SUN2	-23.7272	97.6126	-4.33089	1.87295e-05	5.82619e-05	2.03009
SNRPB	-148.823	734.656	-4.32968	1.88281e-05	5.85222e-05	2.02511
EIF3I	-55.7806	433.832	-4.3279	1.89745e-05	5.89586e-05	2.01775
SSR2	-23.8957	133.071	-4.32715	1.90364e-05	5.91319e-05	2.01466
SOX4	-56.8623	135.962	-4.32351	1.93389e-05	6.00241e-05	1.9997
DYNLL1	-32.5006	242.884	-4.31936	1.96899e-05	6.10557e-05	1.98262
GPR87	-28.5386	74.7177	-4.31374	2.01748e-05	6.24011e-05	1.95953
PSCA	1736.97	2270.9	4.31283	2.02543e-05	6.26272e-05	1.9558
H1F0	-171.954	409.303	-4.309	2.05928e-05	6.36236e-05	1.94007
TPM4	-57.4898	241.984	-4.30869	2.06201e-05	6.3698e-05	1.93881
SLC39A6	-31.8832	111.951	-4.30816	2.06678e-05	6.38351e-05	1.93662
TIMM23	-25.4348	160.361	-4.3036	2.10789e-05	6.50125e-05	1.91794
HMGCS1	-22.9482	55.8314	-4.28812	2.25343e-05	6.91963e-05	1.85459
KIF22	-20.5714	72.172	-4.28765	2.25794e-05	6.93239e-05	1.8527
CDK4	-36.2699	93.8202	-4.28479	2.28594e-05	7.01287e-05	1.84101
AXL	-26.2819	33.7566	-4.27326	2.402e-05	7.3528e-05	1.79404
ALKBH7	26.8008	94.8667	4.27241	2.41078e-05	7.37736e-05	1.79058
COMT	36.9573	126.178	4.26828	2.45393e-05	7.50589e-05	1.77376
KLHDC7B	-105.934	131.406	-4.26326	2.50729e-05	7.66192e-05	1.75336
CALM1	-25.3941	147.851	-4.25853	2.5586e-05	7.80898e-05	1.73416
FBXW5	-26.0072	117.461	-4.25463	2.6017e-05	7.93311e-05	1.71832
RSL1D1	-20.1263	90.8651	-4.24883	2.66702e-05	8.1209e-05	1.69482
CLIC1	-128.215	712.647	-4.24706	2.68726e-05	8.17743e-05	1.68766
CENPW	-33.6563	83.9576	-4.24363	2.72686e-05	8.29125e-05	1.67379
NOL7	-32.3418	106.349	-4.24226	2.74286e-05	8.33757e-05	1.66825
CXCL10	-201.702	184.992	-4.24056	2.76287e-05	8.39577e-05	1.66136
WARS	-127.734	166.03	-4.23912	2.77981e-05	8.44203e-05	1.65557
NELFE	-20.9926	108.156	-4.23842	2.78818e-05	8.46612e-05	1.65272
TNKS1BP1	-27.1771	133.534	-4.23025	2.88691e-05	8.74295e-05	1.61975
PRKCSH	-35.7122	257.678	-4.22049	3.00923e-05	9.09785e-05	1.58043
SERINC3	-36.0673	131.558	-4.20923	3.15665e-05	9.51828e-05	1.53514
ITGB4	-106.227	295.984	-4.20426	3.22384e-05	9.70771e-05	1.51519
RPL37A	73.7213	342.355	4.20143	3.26273e-05	9.81576e-05	1.50384
NDUFB10	38.3707	231.624	4.20131	3.26434e-05	9.8191e-05	1.50337
TMEM14C	-47.0104	218.763	-4.19817	3.30801e-05	9.93823e-05	1.49079
COX4I1	46.7109	243.465	4.1958	3.34126e-05	0.000100339	1.48132
CADM4	-22.0562	52.667	-4.19539	3.34706e-05	0.000100478	1.47968
CTSZ	-132.243	406.704	-4.18865	3.44381e-05	0.000103177	1.4527
DAG1	-24.2176	90.0777	-4.18859	3.44467e-05	0.000103187	1.45247
RTN4	-34.5386	174.6	-4.18542	3.49105e-05	0.000104545	1.43981
PODXL2	-36.4325	80.7111	-4.17678	3.62061e-05	0.00010821	1.40532
NPDC1	20.8987	58.4889	4.17441	3.65692e-05	0.000109228	1.39588
NUCB1	-55.1337	296.96	-4.17381	3.66611e-05	0.000109469	1.3935
ITGA3	-74.5946	169.149	-4.16832	3.75192e-05	0.000111861	1.37161
GNS	-24.7921	97.0031	-4.16513	3.80245e-05	0.000113264	1.35895
SHMT2	-23.3883	97.614	-4.16493	3.80565e-05	0.000113325	1.35815
RPS24	164.188	709.474	4.15587	3.95322e-05	0.000117522	1.32217
LAMB3	-131.961	255.957	-4.15576	3.95509e-05	0.00011756	1.32172
ZMPSTE24	-20.3127	73.3091	-4.14832	4.08043e-05	0.000121024	1.29221
MLF2	-37.9253	226.089	-4.14228	4.18492e-05	0.000123846	1.2683
WDR34	-40.6546	133.012	-4.13013	4.40289e-05	0.000129983	1.22029
CTSC	-35.0093	74.2527	-4.12925	4.41914e-05	0.000130403	1.21681
TOMM22	-21.4506	121.168	-4.12831	4.43649e-05	0.000130876	1.2131
GPAA1	-29.1316	135.458	-4.12722	4.45662e-05	0.00013143	1.20882
POLDIP2	-35.0638	211.658	-4.12465	4.50465e-05	0.000132727	1.19869
WDR1	-27.9775	156.121	-4.11587	4.67251e-05	0.000137425	1.16411
NPM1	-83.7011	404.615	-4.11053	4.77747e-05	0.000140238	1.14312
TSPO	109.894	460.252	4.11032	4.78151e-05	0.000140336	1.14232
OSER1	-20.8037	77.3332	-4.10907	4.80651e-05	0.000141046	1.13739
KLHDC3	-53.9367	202.281	-4.10904	4.80716e-05	0.000141046	1.13726
SOD2	-26.9013	58.0834	-4.09	5.20214e-05	0.000151771	1.06266
IFITM1	-210.102	343.091	-4.08918	5.21988e-05	0.000152211	1.05945
BTBD16	41.8492	54.5064	4.08912	5.22112e-05	0.000152211	1.05922
S100A16	-251.372	745.669	-4.08856	5.23333e-05	0.000152522	1.05702
DHRS2	259.402	413.643	4.08852	5.23417e-05	0.000152524	1.05687
PHB2	-48.3638	284.698	-4.08815	5.2421e-05	0.000152709	1.05544
TNC	-45.393	59.3256	-4.08403	5.33239e-05	0.00015509	1.03931
GRINA	-51.6472	276.704	-4.07979	5.42648e-05	0.000157635	1.02279
RPS9	101.083	564.28	4.0732	5.57625e-05	0.000161698	0.997083
ARL4C	-20.8553	51.8839	-4.07092	5.62902e-05	0.00016318	0.988189
S100A4	673.365	944.592	4.0694	5.66426e-05	0.000164177	0.982298
RNF187	-22.6501	139.834	-4.05828	5.92986e-05	0.000171495	0.939042
DDR1	-33.851	136.035	-4.05701	5.96073e-05	0.000172311	0.934142
CENPB	-25.8859	142.741	-4.0475	6.19834e-05	0.000178653	0.897253
ALCAM	-21.7873	40.7152	-4.04646	6.22484e-05	0.000179364	0.893228
ERO1L	-22.4034	68.8369	-4.03175	6.61157e-05	0.000190032	0.836366
MRPL45	-22.9864	75.6143	-4.03015	6.65498e-05	0.000191167	0.830193
ANKRD65	34.9458	86.9077	4.01893	6.96703e-05	0.000199633	0.786978
NDUFA1	61.6306	400.147	4.01817	6.98892e-05	0.000200231	0.784019
SOX9	-20.0497	37.9914	-4.01435	7.09844e-05	0.00020325	0.769358
ST3GAL4	29.3704	68.7863	4.0128	7.14365e-05	0.000204485	0.763373
CYBB	-22.815	26.3594	-4.01273	7.14549e-05	0.000204508	0.763129
PTMA	-126.642	808.707	-4.01242	7.15453e-05	0.000204736	0.761938
HLA-DPA1	-63.621	111.745	-4.00927	7.24686e-05	0.000207197	0.749849
RNF5	-23.1841	120.405	-4.00121	7.48874e-05	0.000213769	0.718899
HSPB1	779.282	2715.48	4.00004	7.52429e-05	0.00021469	0.714436
BATF	22.8812	75.2538	3.99506	7.67822e-05	0.000218827	0.695349
ENSA	-31.0011	145.615	-3.99173	7.78256e-05	0.000221639	0.68263
IMPDH1	-21.9847	71.8046	-3.99035	7.82615e-05	0.000222719	0.677367
SNX3	-34.886	217.17	-3.98146	8.11333e-05	0.00023049	0.643411
SH3GLB2	22.0374	86.3851	3.9775	8.24454e-05	0.000234048	0.628298
CAP1	-99.5992	363.222	-3.963	8.74173e-05	0.000247301	0.573147
SLC12A7	-26.3084	50.9539	-3.95144	9.1587e-05	0.000258351	0.529275
LAMC2	-209.237	180.865	-3.93805	9.66495e-05	0.000271809	0.478634
PPIC	-20.4595	94.6987	-3.9363	9.73298e-05	0.000273448	0.472033
CD74	-842.138	1746.29	-3.93415	9.81736e-05	0.000275621	0.46391
PDCD5	-22.5158	106.304	-3.92693	0.000101052	0.000283133	0.436722
S100P	1029.09	1707.22	3.92513	0.000101786	0.000284905	0.429911
RPL4	159.08	866.365	3.92218	0.000102995	0.000288041	0.418806
ZYX	-52.5824	217.265	-3.91819	0.000104647	0.000292369	0.403838
AGTRAP	-21.5938	87.0409	-3.91811	0.000104681	0.000292382	0.403525
UPK3A	228.027	220.595	3.91163	0.000107425	0.000299635	0.379194
COX6B1	148.397	799.62	3.91162	0.000107431	0.000299635	0.37914
GUSB	-22.1814	80.2225	-3.90884	0.000108627	0.000302712	0.36873
PERP	-234.504	615.793	-3.90863	0.000108719	0.000302927	0.367928
C19orf48	-22.7952	92.0273	-3.90686	0.000109489	0.000304897	0.361295
PLD3	-53.6619	181.657	-3.90472	0.000110426	0.000307287	0.353287
GBP2	-28.9981	88.6298	-3.90291	0.000111228	0.000309344	0.346477
PRDX4	-34.2867	147.831	-3.90113	0.000112019	0.000311235	0.339814
HIST1H4H	-29.2774	23.7269	-3.89157	0.000116357	0.000322693	0.304095
SYTL1	20.1766	66.5694	3.88399	0.000119912	0.000332174	0.275815
RPL38	71.9229	363.128	3.87977	0.00012194	0.000337202	0.260056
EGFR	-65.2998	58.0157	-3.87434	0.000124587	0.000344151	0.239876
SYPL1	-50.7804	229.558	-3.87349	0.000125006	0.000345164	0.236718
PSMB7	-44.6677	238.282	-3.87169	0.000125902	0.00034749	0.23001
ARPC2	-29.4948	183.468	-3.86087	0.000131402	0.000361652	0.189842
IFI35	-33.189	89.6639	-3.85852	0.000132627	0.000364869	0.181128
PYGB	-45.4569	130.199	-3.8483	0.000138076	0.000378954	0.143323
LAMB1	-27.8095	98.0645	-3.84798	0.000138251	0.000379382	0.14213
PDAP1	-23.6121	175.301	-3.84276	0.000141122	0.000386609	0.122837
RPL3	249.668	1330.07	3.84019	0.000142553	0.000390368	0.113362
UQCRQ	58.9853	283.604	3.83248	0.000146935	0.000401861	0.0849451
SLBP	-24.3843	109.9	-3.83133	0.000147599	0.000403514	0.0807136
NET1	-73.7247	207.159	-3.83129	0.00014762	0.000403514	0.0805808
NIPSNAP1	-25.1532	98.997	-3.82205	0.000153068	0.000417526	0.0465762
C9orf16	36.356	146.595	3.82063	0.000153918	0.000419729	0.0413772
TUBB2B	-42.9198	21.5544	-3.81925	0.000154753	0.000421887	0.0363058
RPL18A	79.2838	406.456	3.81903	0.000154884	0.000422185	0.0355123
RPL27A	72.0973	367.421	3.81835	0.000155297	0.000423251	0.0330146
CCR7	24.8916	33.2475	3.81315	0.000158488	0.00043171	0.0139296
TMEM205	31.8226	144.117	3.80612	0.000162895	0.000442604	-0.0117897
YWHAZ	-121.193	472.863	-3.80399	0.000164259	0.000445755	-0.0196127
HMGB3	-21.8145	87.0129	-3.79765	0.000168367	0.000456143	-0.0427717
CHCHD10	32.4828	95.1778	3.79398	0.000170787	0.000462137	-0.0561553
CAST	-20.0153	71.6405	-3.79357	0.00017106	0.000462801	-0.0576525
GSS	-34.9907	156.849	-3.78661	0.000175755	0.000475043	-0.083034
POMP	-37.3031	247.875	-3.78561	0.000176434	0.000476812	-0.0866472
SEPHS2	-21.471	103.843	-3.77992	0.000180373	0.000486921	-0.107342
MARCKSL1	-155.467	523.851	-3.77977	0.00018048	0.000487142	-0.107896
UPK3B	120.107	237.26	3.77941	0.000180732	0.000487754	-0.109203
FCGR3A	-41.2092	62.5626	-3.77891	0.000181087	0.00048851	-0.111042
NOTCH3	-32.6407	96.7209	-3.77705	0.000182391	0.000491623	-0.117769
COPRS	-26.0065	91.2155	-3.77547	0.000183512	0.00049444	-0.123509
AHR	-44.4994	120.166	-3.77475	0.000184028	0.000495762	-0.12614
HIST2H2BE	-26.8285	56.4173	-3.77199	0.000186009	0.000500823	-0.136172
MXRA5	-23.698	38.9155	-3.77136	0.000186459	0.000501965	-0.138434
BHLHE40	-83.6425	273.704	-3.76824	0.000188722	0.00050764	-0.14974
REEP6	46.1603	66.1534	3.76549	0.000190744	0.000512938	-0.159723
SERPING1	-97.235	219.817	-3.75902	0.000195575	0.000525206	-0.183147
BCAT2	28.0026	92.9776	3.75881	0.00019573	0.000525407	-0.18389
PLK2	-22.5395	46.199	-3.75741	0.000196788	0.000527925	-0.188942
ENSG00000115128	-27.3593	205.249	-3.75607	0.000197811	0.000530485	-0.193796
MRPL15	-27.3657	173.954	-3.75177	0.000201117	0.000538759	-0.209316
SQLE	-20.9951	67.9123	-3.75161	0.000201244	0.000539028	-0.20991
GNAI2	-23.1998	141.666	-3.74868	0.000203525	0.000544691	-0.220464
CPE	-26.5256	33.2262	-3.7417	0.000209072	0.00055801	-0.245638
PLS3	-24.0885	89.5207	-3.73966	0.000210721	0.00056218	-0.25299
F3	-71.5681	95.0527	-3.73616	0.000213573	0.000568938	-0.265576
HNRNPA1	-60.9188	427.219	-3.73594	0.000213756	0.000569349	-0.266378
IFITM3	-421.339	1030.38	-3.72639	0.000221728	0.00058923	-0.300645
KRT7	569.817	1691.85	3.72107	0.000226298	0.000600794	-0.319733
FN1	-283.068	449.157	-3.719	0.000228094	0.000605152	-0.327129
MAGED1	-36.8532	118.996	-3.71553	0.000231151	0.000612762	-0.33958
MDH2	-29.6964	209.577	-3.71018	0.000235925	0.000624319	-0.358701
PSMC4	-54.4296	180.546	-3.70752	0.000238328	0.000629998	-0.36818
ITGB6	-37.1089	82.3265	-3.70376	0.000241776	0.000638165	-0.381613
CKS2	-66.1071	241.388	-3.69564	0.000249371	0.00065715	-0.410532
PTTG1IP	-50.1392	276.775	-3.69095	0.00025386	0.000668438	-0.427208
MDK	-167.895	507.555	-3.69068	0.000254123	0.000669042	-0.428177
C19orf53	37.0179	271.123	3.68568	0.000258998	0.00068087	-0.445938
HES4	24.8475	63.9782	3.68426	0.000260404	0.00068429	-0.450997
ABCC1	-22.4641	41.3896	-3.68411	0.000260547	0.000684574	-0.451509
SSH3	46.9888	155.271	3.67884	0.000265814	0.000697383	-0.470212
PSME2	-41.4215	175.478	-3.67858	0.000266074	0.000697972	-0.471126
PPP1CA	-55.2862	300.441	-3.67639	0.0002683	0.000703624	-0.478911
PCBD1	29.1453	152.131	3.67559	0.000269109	0.000705366	-0.481722
NAMPT	-21.0345	53.2619	-3.66711	0.000277892	0.000727221	-0.511726
RPLP2	261.456	1316.3	3.66567	0.000279409	0.00073091	-0.51681
EHD2	-35.348	104.576	-3.66425	0.000280916	0.000734545	-0.521834
RAC2	-28.7179	67.6137	-3.66412	0.000281056	0.000734812	-0.522298
C1QC	-215.73	308.667	-3.66261	0.000282663	0.00073862	-0.527625
CD44	-64.6017	138.647	-3.66179	0.000283539	0.00074081	-0.530515
HIGD2A	48.0249	285.919	3.66064	0.000284772	0.000743932	-0.534567
FSCN1	-108.329	284.639	-3.65841	0.00028718	0.000749623	-0.54243
GPX2	267.662	582.661	3.65355	0.000292501	0.000762293	-0.559572
CRKL	-25.0619	68.2566	-3.65109	0.000295228	0.000768889	-0.568237
CLDN1	-144.651	261.647	-3.63988	0.00030795	0.000799364	-0.607619
PLOD1	-33.2666	123.295	-3.63637	0.000312043	0.000809239	-0.619942
RALY	-20.9285	119.01	-3.63553	0.000313031	0.000811691	-0.622889
FAM3B	21.9179	47.7196	3.63148	0.000317816	0.000823337	-0.637046
JTB	-52.2928	360.155	-3.61843	0.000333747	0.000862441	-0.682673
RPL12	148.906	816.173	3.61248	0.000341258	0.000881269	-0.703429
STOM	-56.4068	154.58	-3.60965	0.000344885	0.000889814	-0.713286
ZFP36L2	-48.0771	222.398	-3.60636	0.000349142	0.000900559	-0.724723
SPINK1	674.257	983.043	3.60412	0.000352084	0.000907549	-0.732546
MSLN	-31.592	29.6271	-3.60321	0.000353281	0.000910156	-0.73571
ATF5	-37.0467	70.0722	-3.59284	0.000367186	0.000944366	-0.771694
PPIA	-40.4666	338.125	-3.58837	0.000373333	0.000958789	-0.787163
DEGS1	-32.2234	74.9546	-3.58548	0.000377369	0.000968265	-0.797181
CD63	152.167	861.659	3.58452	0.000378719	0.000971282	-0.800508
PSAP	-358.493	1451.49	-3.5845	0.000378743	0.000971282	-0.800568
EIF5A	-94.5053	604.249	-3.58019	0.000384854	0.000985791	-0.815479
GLUL	-53.9841	178.543	-3.55351	0.000424752	0.00108148	-0.907327
HLA-DQA1	-29.5391	47.0339	-3.5425	0.000442335	0.00112289	-0.945072
IFI27	-127.39	282.954	-3.53877	0.000448426	0.00113777	-0.957796
SERPINB1	-60.7183	133.595	-3.53516	0.000454415	0.00115207	-0.970137
DHCR24	-90.143	249.919	-3.53488	0.000454884	0.00115311	-0.971096
CAPN1	-32.7716	210.603	-3.53418	0.000456061	0.00115564	-0.9735
HINT1	-57.1757	300.594	-3.53342	0.000457337	0.00115857	-0.976099
NKG7	-24.3976	34.3845	-3.5329	0.000458196	0.00116045	-0.977845
RPL13A	440.253	2705.31	3.51359	0.000491755	0.00123888	-1.04357
ITGB5	-23.0899	79.8704	-3.49799	0.00052054	0.00130736	-1.09643
ENO2	-25.976	51.2042	-3.49581	0.000524684	0.00131675	-1.10379
FURIN	-31.2051	116.263	-3.4952	0.000525861	0.0013192	-1.10587
PTMS	-187.477	623.092	-3.48265	0.000550363	0.00137731	-1.14817
TUBA4A	-26.0151	70.9298	-3.47763	0.000560469	0.00140064	-1.16506
UBL5	31.0852	224.535	3.46886	0.000578534	0.00144228	-1.19451
MMP14	-136.957	432.718	-3.46607	0.000584401	0.00145524	-1.20387
CSF1R	-20.4085	28.1592	-3.4642	0.000588368	0.00146475	-1.21015
MAF1	-25.5359	205.519	-3.4636	0.000589635	0.00146734	-1.21215
SOX2	-40.1649	24.7824	-3.46147	0.000594178	0.00147771	-1.21927
BST2	-214.862	621.118	-3.45991	0.000597532	0.00148568	-1.22449
BASP1	-68.3814	163.11	-3.45543	0.000607259	0.00150814	-1.23947
PLAU	-108.758	243.511	-3.45457	0.000609147	0.00151244	-1.24235
RPS8	216.482	1402.75	3.45036	0.000618462	0.00153401	-1.25642
RPS25	144.008	996.951	3.45012	0.000618984	0.00153511	-1.25721
TAGLN2	-465.067	1495.26	-3.44561	0.000629122	0.00155868	-1.27227
ADRM1	-30.4888	237.561	-3.42454	0.000678475	0.00167304	-1.34228
ARPC1B	-34.4382	176.251	-3.42293	0.000682385	0.00168107	-1.3476
TGFBI	-105.155	150.501	-3.42225	0.000684056	0.00168476	-1.34987
C10orf99	120.741	200.695	3.41159	0.000710579	0.00174591	-1.38511
CDA	-31.1426	37.0531	-3.40167	0.000736121	0.00180618	-1.41781
BZW2	-20.9271	105.954	-3.39992	0.00074072	0.00181687	-1.42358
P4HA1	-22.6486	87.2344	-3.39335	0.000758207	0.00185642	-1.44517
ARL4D	-25.7794	66.5133	-3.39328	0.000758418	0.0018567	-1.44543
RHOG	-21.0327	115.028	-3.39182	0.000762333	0.00186489	-1.4502
TPT1	177.829	1066.41	3.38817	0.000772283	0.00188711	-1.4622
TRIM29	-35.9432	122.076	-3.38784	0.000773179	0.00188906	-1.46327
MYC	-43.0104	115.031	-3.38601	0.000778218	0.00190019	-1.46928
KCNN4	25.67	84.9639	3.38231	0.000788492	0.00192335	-1.48142
LGALS3BP	-165.597	784.362	-3.38018	0.000794442	0.00193642	-1.48837
FAU	114.67	715.487	3.37309	0.000814611	0.00198139	-1.51156
C1QBP	-24.4748	128.737	-3.357	0.000862158	0.00208951	-1.56401
FLNA	-136.717	337.293	-3.35564	0.000866298	0.00209903	-1.56844
CD164	-21.583	129.334	-3.3552	0.000867622	0.0021019	-1.56985
FXYD3	143.066	594.999	3.35291	0.000874653	0.00211744	-1.57731
CTSH	66.2207	229.557	3.35053	0.000881996	0.00213442	-1.58504
JUN	-62.4387	218.191	-3.34535	0.000898153	0.00217111	-1.60181
MYOF	-20.4862	90.9124	-3.34468	0.000900293	0.00217575	-1.60401
CAV1	-79.8587	141.507	-3.34213	0.000908366	0.0021939	-1.61225
GNB2	-37.8802	326.354	-3.33998	0.000915236	0.00220995	-1.61921
CXCL11	-48.5489	45.1081	-3.33329	0.000936922	0.00225981	-1.64084
HLA-DQA2	-34.0769	47.9797	-3.33034	0.00094664	0.0022824	-1.65037
PMEPA1	-28.925	65.1429	-3.3185	0.000986583	0.00236879	-1.68852
MARCKS	-43.2836	264.228	-3.31632	0.000994097	0.00238537	-1.69553
HIST1H2BD	-32.5521	81.0449	-3.30708	0.00102658	0.002457	-1.7252
C4orf48	26.1583	45.8964	3.30281	0.00104192	0.00249035	-1.73887
PFDN5	31.4472	230.019	3.2858	0.00110515	0.00263154	-1.7932
ANO1	-25.7777	42.2732	-3.28491	0.00110857	0.00263935	-1.79604
IL32	-29.185	63.8564	-3.27924	0.00113051	0.00268799	-1.81411
RPS11	432.565	3154.39	3.27825	0.00113437	0.00269684	-1.81725
C1QB	-199.426	314.493	-3.27739	0.00113775	0.00270422	-1.81999
GPI	-34.8672	172.509	-3.27473	0.00114822	0.00272778	-1.82843
PTRF	-77.8179	220.759	-3.27465	0.00114855	0.00272823	-1.82869
VOPP1	-22.9244	34.0605	-3.26578	0.00118417	0.00280536	-1.85683
CD163	-20.7318	27.6117	-3.25208	0.00124119	0.00293229	-1.90013
RPS14	73.2586	471.522	3.2514	0.0012441	0.00293811	-1.90229
C11orf96	23.5339	43.1524	3.24663	0.00126459	0.00298289	-1.91732
SLC2A4RG	-20.3675	115.413	-3.23852	0.00130019	0.0030628	-1.94286
MRPL51	-35.4452	228.363	-3.23628	0.00131016	0.00308482	-1.94989
TXNRD1	-32.9211	52.8852	-3.2327	0.00132626	0.0031216	-1.96113
PKM	-135.974	670.611	-3.22971	0.00133983	0.00315278	-1.97049
COL12A1	-26.2656	60.9422	-3.22734	0.00135074	0.00317501	-1.97794
COX7C	44.473	343.479	3.22678	0.00135331	0.00317991	-1.97969
LSM7	21.0772	120.74	3.21886	0.00139024	0.003262	-2.00445
ATP6V1G1	-31.8958	283.417	-3.21171	0.00142446	0.00333949	-2.0268
CD53	-26.2169	45.2227	-3.19936	0.00148532	0.00347174	-2.06523
EEF2	-229.86	1520.5	-3.19933	0.00148548	0.00347174	-2.06533
GADD45A	-20.0633	84.8056	-3.19874	0.00148844	0.0034777	-2.06716
RPS19	179.775	1022.76	3.19871	0.00148857	0.0034777	-2.06723
MRFAP1	-43.2853	328.841	-3.1968	0.00149821	0.00349772	-2.07316
APLP2	-48.363	293.271	-3.18875	0.00153952	0.0035899	-2.09814
SNAI2	-29.0386	61.4502	-3.18207	0.00157458	0.00366728	-2.11881
PLXNB2	-34.8765	215.085	-3.17664	0.00160361	0.00373	-2.13557
RHOC	-31.1594	158.804	-3.17417	0.00161701	0.0037594	-2.14321
FASN	-43.3194	157.64	-3.16575	0.00166335	0.00385935	-2.16913
ANXA2	-97.5229	386.071	-3.16093	0.00169044	0.00391942	-2.18394
DAD1	-57.7519	450.424	-3.15173	0.00174328	0.00403572	-2.21216
RPSA	95.8212	630.229	3.15118	0.0017465	0.00404221	-2.21385
P4HB	-106.239	738.93	-3.14911	0.00175862	0.00406785	-2.22018
H2AFJ	34.9911	115.937	3.14691	0.00177155	0.0040968	-2.2269
C19orf33	147.618	538.91	3.14291	0.00179539	0.00414851	-2.23915
TBX2	26.5395	65.4805	3.14263	0.00179706	0.00415188	-2.24
AES	45.9764	283.787	3.13691	0.00183161	0.00422323	-2.25745
SRGN	-92.1429	210.453	-3.13023	0.0018728	0.00431414	-2.27781
UQCR10	58.463	354.896	3.12515	0.00190465	0.00438081	-2.29325
COL7A1	-31.8248	76.9384	-3.12475	0.00190718	0.0043856	-2.29447
TRAPPC6A	21.9546	102.171	3.12423	0.00191045	0.00439261	-2.29604
SCAND1	30.0171	116.524	3.12143	0.00192832	0.00442953	-2.30456
IDH2	-36.6568	204.641	-3.1164	0.00196072	0.00450079	-2.31981
ATP5E	23.0231	175.205	3.11337	0.00198048	0.00454348	-2.32898
TSPAN13	-37.7809	137.763	-3.09788	0.00208437	0.00476674	-2.37575
CLTA	-29.9562	197.192	-3.09204	0.00212486	0.00485134	-2.39333
FSTL1	-30.3032	97.7547	-3.08931	0.00214406	0.00489068	-2.40155
BCL2L1	-42.8518	147.904	-3.08194	0.0021966	0.00500122	-2.42368
SLC50A1	-22.2652	115.795	-3.08016	0.00220945	0.0050276	-2.42901
TUBB4B	-113.723	760.267	-3.07929	0.00221574	0.00504058	-2.4316
UBE2M	-26.0944	160.887	-3.06752	0.0023028	0.00522115	-2.4668
CD59	-68.4148	216.097	-3.05624	0.00238918	0.00539764	-2.50041
ROMO1	77.1734	402.263	3.05492	0.00239948	0.00541779	-2.50434
CDH1	-64.4286	278.423	-3.05012	0.00243725	0.00549673	-2.51859
UBD	-21.5838	30.9039	-3.04606	0.0024697	0.00556605	-2.53065
NDUFB7	77.6583	499.019	3.03091	0.0025941	0.00582698	-2.57546
IGF2	732.642	1042.4	3.03043	0.0025981	0.00583464	-2.57686
THEM6	25.492	103.655	3.02836	0.00261564	0.0058673	-2.583
CFL1	-85.7954	666.223	-3.02692	0.00262781	0.00589325	-2.58723
COL5A2	-48.6994	104.938	-3.02293	0.00266189	0.00596285	-2.59897
PKP1	-71.5593	108.905	-3.01998	0.00268744	0.00601871	-2.60767
KRT6A	-995.221	1359.78	-3.01759	0.00270824	0.00606113	-2.61469
TST	29.3331	103.084	3.01583	0.00272365	0.00609214	-2.61986
SERINC2	117.426	490.57	3.00521	0.00281841	0.00628614	-2.651
VAT1	-32.1136	222.209	-3.00323	0.00283639	0.00632336	-2.65679
TXNIP	-125.457	435.773	-2.99832	0.00288143	0.00641793	-2.67112
CNN2	-34.3129	193.09	-2.99736	0.00289038	0.00643713	-2.67395
KIAA1522	-30.104	172.537	-2.99597	0.00290325	0.00646212	-2.67799
SERPINH1	-45.965	216.237	-2.99544	0.00290818	0.00647161	-2.67953
FKBP1A	-39.353	353.517	-2.99398	0.00292189	0.00649917	-2.68381
PLEKHF1	-24.6259	48.4343	-2.99114	0.00294859	0.00654964	-2.69209
HLA-DMA	-31.935	96.13	-2.98204	0.00303571	0.00672866	-2.71857
CAPZB	-28.8527	295.771	-2.98049	0.00305073	0.00675889	-2.72305
GM2A	-25.8021	117.648	-2.97978	0.00305773	0.00677363	-2.72514
FLOT1	-28.1184	194.615	-2.97342	0.00312037	0.0069038	-2.74357
RPL39	30.6702	215.528	2.97157	0.00313886	0.00694157	-2.74894
CMTM6	-21.9291	127.778	-2.96106	0.0032456	0.00715486	-2.77932
PVRL2	-20.4262	134.644	-2.9588	0.00326895	0.00720001	-2.78583
SNRPD3	-21.4207	154.492	-2.95809	0.00327635	0.00721387	-2.78788
MMP12	-60.6643	75.2298	-2.95666	0.00329127	0.00724426	-2.79201
IGFBP4	224.29	963.901	2.95292	0.00333047	0.00732314	-2.80276
PVRL1	-35.8549	144.158	-2.93374	0.00353878	0.00773947	-2.85781
TUFM	-53.7894	375.16	-2.93175	0.00356101	0.00778287	-2.86348
SERPINB5	-45.91	114.273	-2.9235	0.00365469	0.00797249	-2.88703
SRSF6	-21.996	130.173	-2.91543	0.00374862	0.00816194	-2.91002
MAL	93.6289	103.124	2.91382	0.00376754	0.0081995	-2.91459
THBS1	-51.8414	123.185	-2.90972	0.00381624	0.00829903	-2.92622
HLA-DRB1	-399.939	965.062	-2.89015	0.00405697	0.00878838	-2.9816
PSMB6	-31.3138	253.418	-2.88993	0.00405978	0.00879268	-2.98222
SLC25A39	-22.0499	200.402	-2.88971	0.00406256	0.00879757	-2.98284
RPL23A	91.2342	641.275	2.8852	0.00412	0.00891014	-2.99554
TMC4	24.6829	113.565	2.8845	0.00412889	0.00892837	-2.99749
FBP1	60.8053	176.827	2.87029	0.00431521	0.00929535	-3.0374
AKR1C2	63.3563	110.259	2.85612	0.00450857	0.00967676	-3.077
TNS4	-31.8776	110.09	-2.85396	0.00453867	0.00973388	-3.08301
MEA1	-41.044	253.332	-2.85333	0.00454757	0.00974977	-3.08478
EGR1	-73.5224	206.886	-2.85103	0.00457982	0.00981032	-3.09116
TESC	25.6515	41.585	2.85055	0.00458659	0.00982268	-3.0925
SLC38A2	-32.4542	188.242	-2.84573	0.00465525	0.00995883	-3.10591
TRNP1	20.3306	45.6941	2.84455	0.00467216	0.00999172	-3.10918
KDELR1	-38.2644	398.853	-2.84401	0.00467994	0.0100051	-3.11068
FBLN2	-21.5557	44.8939	-2.84356	0.00468645	0.0100168	-3.11194
SLC3A2	-32.0243	143.191	-2.84298	0.00469483	0.0100325	-3.11355
PYGL	-25.4737	106.637	-2.8422	0.00470602	0.0100543	-3.1157
EFEMP1	-39.5817	52.7286	-2.84118	0.00472084	0.0100815	-3.11854
SQSTM1	-24.2877	111.945	-2.84095	0.00472415	0.0100875	-3.11917
JUND	52.2413	292.48	2.83447	0.00481916	0.0102747	-3.13713
PFN1	-166.043	1281.85	-2.83019	0.00488281	0.0103991	-3.14897
EIF6	-55.8642	452.504	-2.8176	0.00507458	0.0107747	-3.18369
VSIG4	-20.0015	28.7771	-2.81636	0.0050938	0.010812	-3.1871
NFKBIA	-57.1347	247.01	-2.80319	0.00530225	0.0112034	-3.22322
MFAP2	-23.2945	62.1399	-2.79632	0.00541418	0.0114227	-3.24203
PPAP2A	24.7604	100.965	2.79588	0.00542139	0.0114342	-3.24322
KRT5	-1071.37	1821.5	-2.79392	0.00545367	0.0114998	-3.24857
ABHD12	23.6421	138.127	2.79175	0.00548977	0.0115697	-3.2545
TNNI2	71.1223	115.369	2.78924	0.0055316	0.0116516	-3.26133
PLEK2	-20.9234	70.939	-2.78888	0.00553768	0.0116619	-3.26232
MRPL41	20.9052	109.432	2.78457	0.00561033	0.0118022	-3.27404
PLIN2	-21.3663	60.4976	-2.78128	0.00566642	0.0119135	-3.28299
EVPL	26.8962	125.456	2.77487	0.00577723	0.0121233	-3.3004
DSC3	-47.1298	74.397	-2.77358	0.00579976	0.0121693	-3.3039
GRN	-88.1823	614.857	-2.76942	0.00587283	0.0123068	-3.31515
TNFRSF1A	-22.3361	160.424	-2.75957	0.00604945	0.0126498	-3.34177
GJB2	-209.877	369.678	-2.75863	0.00606658	0.0126816	-3.34431
SNX31	37.0725	72.3575	2.75476	0.00613749	0.0128203	-3.35474
ARF5	-28.192	304.483	-2.74393	0.00633979	0.0132132	-3.38384
TGFB1	-23.7459	101.905	-2.72757	0.00665669	0.0138105	-3.42758
RHOD	-51.6391	119.057	-2.72291	0.00674959	0.0139825	-3.44
DPP7	21.1901	140.212	2.71782	0.00685244	0.0141776	-3.45355
ERMP1	-23.3815	76.0299	-2.71463	0.00691759	0.0142988	-3.46202
IGSF8	-24.0893	110.5	-2.71329	0.00694512	0.0143496	-3.46558
HSD17B10	-29.6784	264.53	-2.70978	0.00701757	0.014481	-3.47487
HIST1H1C	-183.068	413.447	-2.70674	0.00708107	0.0145971	-3.48293
HLA-DPB1	-76.0922	215.422	-2.69623	0.00730422	0.0150171	-3.51069
ISYNA1	33.0838	116.059	2.6922	0.00739153	0.0151775	-3.52132
MYL12B	-131.749	1026.39	-2.69168	0.00740289	0.0151977	-3.52269
RPL8	380.588	2917.4	2.67954	0.00767185	0.0157054	-3.55459
PHLDA3	26.5827	152.972	2.6727	0.00782711	0.0159781	-3.57249
IER3	-51.9834	194.091	-2.66676	0.00796449	0.0162281	-3.58802
EPCAM	-49.746	200.324	-2.65558	0.00822856	0.0167088	-3.61713
CRTAC1	55.0587	47.4088	2.6498	0.00836823	0.0169625	-3.63214
C1R	-52.1182	171.066	-2.64954	0.00837453	0.0169735	-3.63281
IRF6	-41.642	164.038	-2.64875	0.00839366	0.0170088	-3.63485
PSMB1	-25.5443	231.822	-2.635	0.0087353	0.0176463	-3.6704
NDUFS2	-25.8878	123.104	-2.63241	0.0088011	0.0177627	-3.67709
C1S	-43.574	141.863	-2.63116	0.008833	0.0178216	-3.68031
TUBA1A	-60.5356	131.482	-2.62919	0.00888334	0.0179136	-3.68537
IGFBP3	293.013	826.584	2.62688	0.00894295	0.018023	-3.69132
ANXA1	-105.256	308.042	-2.61468	0.00926305	0.0186107	-3.72262
NDRG1	-89.9859	246.514	-2.60688	0.00947306	0.0189917	-3.74256
RPL37	49.9529	365.547	2.59976	0.00966868	0.0193443	-3.76073
ST14	-41.0037	248.258	-2.59755	0.00972996	0.019447	-3.76634
NGFRAP1	-56.5581	387.49	-2.59564	0.00978325	0.0195376	-3.77119
RPL11	139.106	1353.38	2.59234	0.00987605	0.0196988	-3.77958
TUBB6	-28.5526	78.4408	-2.58922	0.0099646	0.0198623	-3.78751
ERRFI1	-24.5584	97.308	-2.58628	0.0100485	0.0200123	-3.79495
CDC42EP1	-24.2778	105.138	-2.57099	0.0104957	0.0208224	-3.83359
MAL2	-49.5187	243.427	-2.57036	0.0105146	0.0208577	-3.83518
LAPTM5	-53.1325	159.803	-2.56559	0.0106577	0.0211201	-3.84716
KRT8	248.637	1193.25	2.56409	0.0107032	0.0211932	-3.85094
CLCA2	-50.4407	101.498	-2.5599	0.0108311	0.0214204	-3.86147
DPYSL3	-22.132	58.6999	-2.55883	0.0108639	0.0214788	-3.86414
COTL1	-20.6477	90.7025	-2.55777	0.0108963	0.021532	-3.86679
SLC40A1	-22.5494	46.9031	-2.55401	0.0110128	0.0217294	-3.87621
CXCL13	-102.708	67.324	-2.54792	0.0112038	0.0220862	-3.89144
FAM83A	-25.6648	68.1296	-2.54174	0.0114006	0.0224335	-3.90685
MAGED2	-26.6074	184.065	-2.5401	0.0114534	0.0225283	-3.91093
LMAN2	-25.8901	264.931	-2.53995	0.0114582	0.0225355	-3.9113
SSR4	21.9973	136.505	2.528	0.0118491	0.0232507	-3.94098
CPNE1	-31.7084	190.295	-2.51904	0.0121502	0.0237986	-3.96315
ID1	185.977	702.463	2.51289	0.0123609	0.0241653	-3.97833
UCHL1	-45.2037	53.6625	-2.51265	0.0123692	0.0241791	-3.97892
PADI3	56.9937	150.131	2.50546	0.0126194	0.024624	-3.99661
CTSB	-111.475	495.742	-2.50528	0.0126258	0.024634	-3.99705
SLC9A3R1	-32.2732	136.669	-2.50203	0.0127403	0.0248351	-4.00502
COX5B	35.5646	287.524	2.48689	0.013287	0.0258109	-4.04207
CXCL1	-49.4148	86.1059	-2.48382	0.0134001	0.0260081	-4.04953
CCL20	-45.3618	37.8436	-2.47699	0.0136552	0.0264579	-4.06614
GJA1	-53.4548	167.175	-2.47278	0.0138149	0.0267382	-4.07638
FGFR3	75.5458	178.137	2.47171	0.0138555	0.0268143	-4.07896
EPHB6	20.8117	59.7689	2.45619	0.0144592	0.0279053	-4.11648
PITX1	-22.4119	50.803	-2.45402	0.0145455	0.0280609	-4.12171
CTSL	-57.989	210.123	-2.45221	0.0146176	0.0281916	-4.12606
EFNA1	-35.4496	145.314	-2.4462	0.0148599	0.0286081	-4.1405
RPS21	181.824	1462.98	2.44528	0.0148975	0.0286749	-4.14272
LY6E	-159.797	517.158	-2.44414	0.0149441	0.0287454	-4.14546
TRAM1	-36.8612	193.238	-2.44106	0.0150702	0.0289704	-4.15284
GAPDH	-508.252	3677.06	-2.43539	0.0153049	0.0293616	-4.16641
JUP	-104.735	642.974	-2.43483	0.0153283	0.0294001	-4.16775
SLC39A7	-33.0633	260.933	-2.43071	0.0155009	0.029702	-4.17757
APRT	26.3043	229.565	2.42227	0.0158602	0.0303207	-4.19767
GPC1	-32.1505	119.088	-2.42196	0.0158734	0.0303417	-4.1984
HMGN3	-23.9513	167.06	-2.40878	0.01645	0.0313459	-4.22966
PVALB	34.6176	33.4213	2.40878	0.01645	0.0313459	-4.22966
UBA52	38.0318	398.553	2.40848	0.0164632	0.031368	-4.23036
HIST1H2AI	-22.3056	10.6681	-2.40395	0.0166658	0.0317324	-4.24107
BRK1	-63.8698	517.74	-2.40338	0.0166914	0.0317749	-4.24241
PPP4C	-22.868	201.325	-2.40045	0.0168239	0.0320023	-4.24933
GDPD3	24.0953	63.9095	2.39996	0.016846	0.0320412	-4.25048
SYT8	42.7252	98.5732	2.3959	0.0170311	0.0323755	-4.26004
LMNA	-38.1824	296.516	-2.39272	0.017177	0.0326234	-4.2675
ZNF385A	26.3793	129.342	2.39204	0.0172085	0.0326705	-4.2691
CALML3	-81.6157	136.455	-2.38406	0.0175808	0.0333159	-4.28781
AREG	-54.8183	84.0687	-2.38121	0.0177154	0.0335515	-4.29448
THBD	-44.2513	89.5541	-2.38035	0.0177564	0.0336161	-4.2965
TMED9	-30.4872	319.238	-2.37943	0.0178001	0.0336923	-4.29864
GPX4	41.3808	361.319	2.36897	0.0183044	0.0345568	-4.32304
FAM127B	-37.2383	179.173	-2.36737	0.0183823	0.0346871	-4.32674
RPL26	52.4966	389.66	2.35024	0.0192385	0.0361357	-4.36644
GNG5	-27.3262	341.768	-2.33498	0.0200304	0.0374613	-4.40156
OST4	51.1521	684.151	2.33464	0.0200483	0.0374841	-4.40234
CFD	24.585	58.8072	2.3316	0.0202098	0.0377391	-4.40931
EEF1A1	-217.737	1814.24	-2.32803	0.0204002	0.0380693	-4.41747
HSPB8	26.8335	68.6217	2.32769	0.0204188	0.0381004	-4.41826
CYP4B1	58.9258	171.974	2.32462	0.0205842	0.0383762	-4.42528
KRT6C	-62.3833	56.1218	-2.32332	0.0206544	0.0384851	-4.42824
FCER1G	-34.5288	96.8283	-2.3184	0.0209233	0.0389452	-4.43948
EZR	-66.3435	496.408	-2.31346	0.0211956	0.0393997	-4.45071
RPS18	284.52	2545.06	2.31204	0.0212743	0.039531	-4.45393
RPL15	34.2746	370.921	2.30918	0.0214342	0.0397829	-4.46043
CST3	47.1183	307.304	2.30334	0.0217638	0.0403488	-4.47367
RPL27	89.7646	985.654	2.3032	0.0217715	0.0403592	-4.47398
EFNB1	-23.1385	120.263	-2.29896	0.0220139	0.0407661	-4.48358
TMEM176B	-31.1342	92.1887	-2.29572	0.0222	0.0410745	-4.49088
CTSE	55.4269	67.4271	2.29043	0.0225079	0.0415983	-4.50282
IDO1	-36.9952	48.9186	-2.2864	0.0227443	0.042	-4.51187
CD9	-82.4206	509.607	-2.28597	0.0227698	0.0420427	-4.51284
CIB1	44.4886	373.471	2.28368	0.0229052	0.0422569	-4.51798
HLA-DQB1	-34.4746	84.329	-2.27838	0.0232222	0.0427691	-4.52988
FTH1	-123.402	815.05	-2.27149	0.0236395	0.0434559	-4.54528
RPL32	156.463	949.303	2.25338	0.0247672	0.0453036	-4.58556
RPL35	142.093	1160.18	2.25307	0.0247875	0.0453364	-4.58627
KRT19	578.682	3851.27	2.24516	0.0252946	0.0461581	-4.60375
FKBP10	-28.3698	100.004	-2.22014	0.0269598	0.0489123	-4.65869
CBR1	-32.6143	112.632	-2.21986	0.0269794	0.0489388	-4.65931
RPS6	336.75	2373.83	2.21971	0.0269896	0.0489482	-4.65964
TOP2B	-29.0559	147.406	-2.21691	0.0271819	0.0492468	-4.66574
CHMP2A	21.9958	203.341	2.21166	0.0275458	0.0498599	-4.67718

## Sheet: B
GO analysis of 1525 RNA modification-related DEGs
ONTOLOGY	ID	Description	GeneRatio	BgRatio	pvalue	p.adjust	qvalue	geneID	Count
BP	GO:0002181	cytoplasmic translation	73/1406	161/18903	1.09848e-39	6.31847e-36	4.57547e-36	DHX9/HNRNPU/EIF4G1/EIF4H/DENR/PAIP1/YTHDF2/EIF2S3/ETF1/SYNCRIP/CSDE1/EIF3A/EIF5/CNBP/FTSJ1/HNRNPD/EIF2S2/EIF3B/RPS28/RPL28/DRG1/RPS15/RPL18/RPLP1/EIF3L/RPL14/EIF4A2/RPL29/EIF4B/RPL13/RPL34/RPS2/RPL24/RPL9/YBX3/RPS20/RPL36/EIF3I/RPL37A/RPS24/RPS9/RPL4/RPL38/RPL3/SLBP/RPL18A/RPL27A/RPLP2/RPL12/RPL13A/RPS8/RPS25/FAU/RPS11/RPS14/PKM/RPS19/RPSA/RPL39/RPL23A/RPL8/RPL37/RPL11/RPS21/UBA52/ZNF385A/RPL26/R…	73
BP	GO:0016032	viral process	104/1406	421/18903	1.17784e-28	3.38747e-25	2.45301e-25	ADAR/HCFC1/DHX9/NUP153/DEK/SNW1/OAS3/PARP9/PTBP1/LARP1/DENR/TRIM26/STAT1/SRPK1/PAIP1/TOP2A/PCBP1/CANX/KPNA2/DDB1/HSPA8/DDX3X/VCP/CSDE1/STAU1/PLSCR1/IFIH1/HTATSF1/TRIM21/OAS2/EIF3A/NUCKS1/CHMP5/HMGB1/ITGB1/TAF11/CDK1/RAN/RAD23A/RAB7A/IFI16/TRIM22/MX1/SLC7A1/RAB1A/HDAC1/CHMP1B/LAMP1/ILF3/EFNB2/ITGAV/EIF3B/PCBP2/PSMC3/SCARB2/RAB1B/TRIM28/HSP90AB1/TNIP1/TP53/EIF3L/TFRC/ARL8B/ICAM1/ITGA2/CHMP2B/IRF7/C…	104
BP	GO:0019058	viral life cycle	79/1406	319/18903	4.44916e-22	8.53052e-19	6.17731e-19	ADAR/NUP153/DEK/OAS3/LARP1/TRIM26/SRPK1/TOP2A/PCBP1/KPNA2/DDB1/HSPA8/DDX3X/VCP/STAU1/PLSCR1/IFIH1/HTATSF1/TRIM21/OAS2/NUCKS1/CHMP5/HMGB1/ITGB1/CDK1/RAD23A/RAB7A/IFI16/TRIM22/MX1/SLC7A1/RAB1A/CHMP1B/LAMP1/ILF3/EFNB2/ITGAV/PCBP2/SCARB2/RAB1B/TRIM28/HSP90AB1/TNIP1/TFRC/ARL8B/ICAM1/ITGA2/CHMP2B/CAV2/CHMP1A/OAS1/SMARCB1/IFIT1/AXL/DAG1/IFITM1/SNX3/CD74/EGFR/IFITM3/ITGB6/CLDN1/STOM/PPIA/IFI27/ITGB5/FURI…	79
BP	GO:0000375	RNA splicing, via transesterification reactions	79/1406	333/18903	7.76275e-21	1.11628e-17	8.08348e-18	SNRNP200/THRAP3/DHX9/HNRNPU/HNRNPK/HNRNPR/DDX23/SF1/SNW1/PRPF4/WBP11/PTBP1/HNRNPA2B1/KHDRBS1/USP39/PRMT5/HNRNPL/HNRNPM/HNRNPC/SF3A1/SRPK1/AAR2/HNRNPH3/SF3B2/RBMX/SF3A3/STRAP/SYNCRIP/KHSRP/HSPA8/SRSF1/SON/BCAS2/PRPF8/SFPQ/PSIP1/HTATSF1/HNRNPA3/SF3B3/SRSF3/SRSF7/U2AF2/HNRNPH1/DDX1/ZMAT2/PHF5A/EIF4A3/PRPF19/SF3B4/SF3B1/PPIL1/HNRNPF/CASC3/SRSF2/SRSF4/NCL/SRSF9/PNN/RBM8A/SNRPC/ALYREF/DDX5/SRRM2/MAGOH/…	79
BP	GO:0000377	RNA splicing, via transesterification reactions with bulged adenosine as nucleophile	78/1406	329/18903	1.43726e-20	1.37785e-17	9.97761e-18	SNRNP200/THRAP3/DHX9/HNRNPU/HNRNPK/HNRNPR/DDX23/SF1/SNW1/PRPF4/WBP11/PTBP1/HNRNPA2B1/KHDRBS1/USP39/PRMT5/HNRNPL/HNRNPM/HNRNPC/SF3A1/SRPK1/AAR2/HNRNPH3/SF3B2/RBMX/SF3A3/STRAP/SYNCRIP/HSPA8/SRSF1/SON/BCAS2/PRPF8/SFPQ/PSIP1/HTATSF1/HNRNPA3/SF3B3/SRSF3/SRSF7/U2AF2/HNRNPH1/DDX1/ZMAT2/PHF5A/EIF4A3/PRPF19/SF3B4/SF3B1/PPIL1/HNRNPF/CASC3/SRSF2/SRSF4/NCL/SRSF9/PNN/RBM8A/SNRPC/ALYREF/DDX5/SRRM2/MAGOH/KDM1A/…	78
BP	GO:0000398	mRNA splicing, via spliceosome	78/1406	329/18903	1.43726e-20	1.37785e-17	9.97761e-18	SNRNP200/THRAP3/DHX9/HNRNPU/HNRNPK/HNRNPR/DDX23/SF1/SNW1/PRPF4/WBP11/PTBP1/HNRNPA2B1/KHDRBS1/USP39/PRMT5/HNRNPL/HNRNPM/HNRNPC/SF3A1/SRPK1/AAR2/HNRNPH3/SF3B2/RBMX/SF3A3/STRAP/SYNCRIP/HSPA8/SRSF1/SON/BCAS2/PRPF8/SFPQ/PSIP1/HTATSF1/HNRNPA3/SF3B3/SRSF3/SRSF7/U2AF2/HNRNPH1/DDX1/ZMAT2/PHF5A/EIF4A3/PRPF19/SF3B4/SF3B1/PPIL1/HNRNPF/CASC3/SRSF2/SRSF4/NCL/SRSF9/PNN/RBM8A/SNRPC/ALYREF/DDX5/SRRM2/MAGOH/KDM1A/…	78
BP	GO:0071826	ribonucleoprotein complex subunit organization	64/1406	242/18903	1.06217e-19	8.59615e-17	6.22483e-17	ADAR/SNRNP200/DHX9/DDX23/SF1/CPSF7/EIF4H/PRKDC/USP39/PRMT5/DENR/SF3A1/NUDT21/SRPK1/AAR2/SF3B2/RBMX/EIF2S3/SF3A3/STRAP/SRSF1/VCP/PRPF8/PSIP1/HTATSF1/EIF3A/SF3B3/PTGES3/EIF5/DDX1/PHF5A/PRPF19/SF3B4/SF3B1/XRCC5/TRAF7/HSP90AA1/SRSF9/KIF5B/EIF2S2/EIF3B/RPS28/SNRPC/RPS15/HSP90AB1/EIF3L/ERAL1/EIF4B/PUF60/LSM2/RPL24/PRPF6/SNRPB/EIF3I/RPL38/RPL13A/RPS14/RPS19/RPSA/SNRPD3/SRSF6/RPL23A/EIF6/RPL11	64
BP	GO:0008380	RNA splicing	95/1406	469/18903	1.19557e-19	8.59615e-17	6.22483e-17	SNRNP200/THRAP3/DHX9/HNRNPU/HNRNPK/HNRNPR/DDX23/SF1/SNW1/PPP1R8/PRPF4/WBP11/PTBP1/HNRNPA2B1/KHDRBS1/USP39/PRMT5/HNRNPL/HNRNPM/HNRNPC/SF3A1/SRPK1/AAR2/HNRNPH3/SF3B2/RBMX/SF3A3/STRAP/SYNCRIP/KHSRP/HSPA8/SRSF1/SON/BCAS2/PRPF8/SFPQ/PSIP1/HTATSF1/HNRNPA3/SF3B3/PTBP3/SRSF3/SRSF7/NONO/U2AF2/HNRNPH1/PPP2CA/DDX1/ZMAT2/PHF5A/POLR2A/EIF4A3/FUS/PRPF19/SF3B4/SF3B1/PPIL1/HNRNPF/CASC3/SRSF2/SRSF4/NCL/USP22/SRSF…	95
BP	GO:0022618	ribonucleoprotein complex assembly	62/1406	234/18903	3.6095e-19	2.30687e-16	1.6705e-16	ADAR/SNRNP200/DHX9/DDX23/SF1/CPSF7/EIF4H/PRKDC/USP39/PRMT5/DENR/SF3A1/NUDT21/SRPK1/AAR2/SF3B2/RBMX/EIF2S3/SF3A3/STRAP/SRSF1/PRPF8/PSIP1/HTATSF1/EIF3A/SF3B3/PTGES3/EIF5/DDX1/PHF5A/PRPF19/SF3B4/SF3B1/XRCC5/TRAF7/HSP90AA1/SRSF9/EIF2S2/EIF3B/RPS28/SNRPC/RPS15/HSP90AB1/EIF3L/ERAL1/EIF4B/PUF60/LSM2/RPL24/PRPF6/SNRPB/EIF3I/RPL38/RPL13A/RPS14/RPS19/RPSA/SNRPD3/SRSF6/RPL23A/EIF6/RPL11	62
BP	GO:0140694	non-membrane-bounded organelle assembly	83/1406	386/18903	5.75405e-19	3.30973e-16	2.39672e-16	SMC1A/HNRNPU/UBAP2L/RACGAP1/KPNB1/NUP62/DLGAP5/PRKDC/PATL1/PRC1/SMC3/KIF11/CNOT1/STAG2/PLK1/KIFC1/G3BP2/ANLN/CDCA8/TPX2/YTHDF2/AURKA/DDX3X/TPR/CSDE1/DYNC1H1/YTHDF1/CHMP5/MAPRE1/LSM14A/ATXN2L/PUM2/ITGB1/PRKAR1A/TUBB/FLII/PRRC2C/CCNB2/RNF213/XRCC5/CDK2/TRAF7/BIRC5/CDC20/CHMP1B/RHOA/E2F4/AURKB/MYBL2/LCP1/MSN/RPS28/PLEC/SBDS/SMIM22/DRG1/RPS15/DAZAP2/ACTG1/ERAL1/CHMP2B/RPL24/CHMP1A/RCC1/CENPW/POLDIP2/…	83
BP	GO:0044403	biological process involved in symbiotic interaction	72/1406	307/18903	8.48028e-19	4.43442e-16	3.21115e-16	NUP153/SNW1/TRIM26/PAIP1/DDB1/HSPA8/PLSCR1/TRIM21/NUCKS1/CHMP5/HMGB1/ITGB1/TAF11/CDK1/RAB7A/TRIM22/TCP1/SLC7A1/HDAC1/CHMP1B/LAMP1/EFNB2/ITGAV/MYD88/PSMC3/SCARB2/CDC42/HSPD1/ALYREF/HSP90AB1/TFRC/ARL8B/ICAM1/ITGA2/CHMP2B/CAV2/CHMP1A/SMARCB1/IFIT1/AXL/DAG1/IFITM1/SNX3/CD74/EGFR/IFITM3/FN1/ITGB6/CLDN1/STOM/PPIA/IFI27/ITGB5/FURIN/CSF1R/JUN/CAV1/FASN/RPSA/P4HB/BCL2L1/ROMO1/CFL1/KRT6A/HLA-DRB1/SLC3A2/CT…	72
BP	GO:1903311	regulation of mRNA metabolic process	71/1406	309/18903	4.90748e-18	2.35232e-15	1.70341e-15	THRAP3/DHX9/HNRNPU/HNRNPK/SF1/SNW1/CPSF7/PATL1/PTBP1/LARP1/HNRNPA2B1/KHDRBS1/SERBP1/CNOT1/PRMT5/HNRNPL/HNRNPM/HNRNPC/SAMD4B/NUDT21/SRPK1/PAIP1/RBMX/YTHDF2/SYNCRIP/KHSRP/HSPA8/SON/CSDE1/ALKBH5/YTHDF1/SRSF3/SRSF7/PUM2/U2AF2/IGF2BP2/EIF4A3/FUS/PRPF19/MAPKAPK2/SF3B4/AHCYL1/CASC3/SRSF2/HNRNPD/SRSF4/NCL/SRSF9/HNRNPAB/RBM8A/E2F1/MYD88/DDX5/MAGOH/DDX17/PAF1/CARHSP1/PUF60/POLR2G/PRDX6/APEX1/ZFP36L1/YBX3/P…	71
BP	GO:0022613	ribonucleoprotein complex biogenesis	93/1406	489/18903	2.27351e-17	1.00594e-14	7.28442e-15	ADAR/XPO1/SNRNP200/DHX9/XRN2/DDX23/SF1/CPSF7/EIF4H/PRKDC/WBP11/USP39/PRMT5/DENR/SF3A1/NUDT21/SRPK1/AAR2/SF3B2/RBMX/YTHDF2/EIF2S3/SF3A3/STRAP/DDX21/SRSF1/DDX3X/PRPF8/PSIP1/HTATSF1/EIF3A/SF3B3/DKC1/PTGES3/EIF5/DDX1/RAN/PHF5A/EIF4A3/PRPF19/SF3B4/SF3B1/XRCC5/NOLC1/TRAF7/HSP90AA1/SRSF9/ABCE1/EIF2S2/NOP56/EIF3B/ZNF622/RPS28/SBDS/SNRPC/RPS15/HSP90AB1/RIOK3/EIF3L/RPL14/PES1/TSR2/ERAL1/DDX17/EIF4B/PUF60/L…	93
BP	GO:0007052	mitotic spindle organization	43/1406	133/18903	3.68875e-17	1.51555e-14	1.09747e-14	SMC1A/HNRNPU/CKAP5/RACGAP1/KPNB1/NUP62/DLGAP5/DCTN1/PRC1/SMC3/KIF11/STAG2/PLK1/KIFC1/CDCA8/TPX2/AURKA/TPR/VCP/DYNC1H1/CHMP5/LSM14A/CLTC/RAN/CCNB1/BIRC5/CDC20/TUBG1/CHMP1B/RHOA/AURKB/MYBL2/SBDS/STMN1/DRG1/CHMP2B/CHMP1A/RCC1/SUN2/POLDIP2/PLK2/FLNA/CHMP2A	43
BP	GO:2001233	regulation of apoptotic signaling pathway	77/1406	374/18903	1.48142e-16	5.68077e-14	4.11368e-14	HNRNPK/PAK2/UBQLN1/PSME3/DNAJA1/DDX3X/PTPN1/CSNK2A1/PSMD10/SFPQ/MAZ/PARP1/NONO/SLC25A5/HYOU1/PMAIP1/CTNNA1/CTNNB1/MCL1/TXNDC12/HDAC1/TRAF7/HMGB2/TMEM14A/NFE2L2/ITGAV/HIF1A/NCK2/IVNS1ABP/TNFSF10/CREB3/GHITM/ENO1/URI1/PEA15/TP53/KDM1A/ITGA6/ICAM1/BAK1/TNFAIP3/TP63/PDIA3/TMBIM6/PPP2R1A/IFI6/YBX3/RAF1/MAGEA3/SERINC3/CTSC/SOD2/GRINA/HSPB1/CD74/GNAI2/MAGED1/PTTG1IP/PPP1CA/CD44/PPIA/EIF5A/TPT1/MYC/CTSH/…	77
BP	GO:1902850	microtubule cytoskeleton organization involved in mitosis	47/1406	163/18903	2.0616e-16	7.41146e-14	5.36695e-14	SMC1A/HNRNPU/CKAP5/RACGAP1/KPNB1/NUP62/DLGAP5/DCTN1/PRC1/SMC3/KIF11/STAG2/PLK1/KIFC1/CDCA8/TPX2/AURKA/NUSAP1/TPR/VCP/DYNC1H1/CHMP5/MAPRE1/LSM14A/ITGB1/CLTC/RAN/CCNB1/BIRC5/CDC20/TUBG1/CHMP1B/RHOA/AURKB/MYBL2/SBDS/STMN1/DRG1/CHMP2B/CHMP1A/RCC1/SUN2/POLDIP2/PLK2/FLNA/GJA1/CHMP2A	47
BP	GO:0034504	protein localization to nucleus	67/1406	306/18903	5.81362e-16	1.96706e-13	1.42443e-13	XPO1/HNRNPU/DTX3L/ECT2/NUP153/KPNB1/NUP62/IPO5/TNPO3/PARP9/STAT3/PLK1/IPO7/HDGF/KPNA2/CIZ1/LMNB1/TPR/LMNB2/CSE1L/PARP1/DKC1/CCT5/CCT3/CDK1/SUMO3/RAN/CTNNA1/TCP1/NOLC1/HSP90AA1/CCT6A/SUMO1/CCT8/CCT4/CALR/YWHAE/RANGAP1/CTDNEP1/CCT7/TRIM28/HSP90AB1/TP53/TFRC/PAF1/FERMT1/BAG3/SUN2/NPM1/PHB2/SOX9/GBP2/CHCHD10/MAGED1/PTTG1IP/GLUL/TRIM29/FLNA/CDH1/TXNIP/MMP12/SQSTM1/NFKBIA/TGFB1/RPL11/JUP/LMNA	67
BP	GO:0051701	biological process involved in interaction with host	51/1406	203/18903	5.5796e-15	1.78299e-12	1.29114e-12	NUP153/TRIM26/DDB1/PLSCR1/TRIM21/CHMP5/HMGB1/ITGB1/CDK1/RAB7A/TRIM22/TCP1/SLC7A1/CHMP1B/LAMP1/EFNB2/ITGAV/SCARB2/ALYREF/HSP90AB1/TFRC/ARL8B/ICAM1/ITGA2/CHMP2B/CAV2/CHMP1A/IFIT1/AXL/DAG1/IFITM1/SNX3/CD74/EGFR/IFITM3/ITGB6/CLDN1/PPIA/ITGB5/FURIN/CAV1/RPSA/P4HB/BCL2L1/KRT6A/HLA-DRB1/SLC3A2/CTSB/CTSL/LY6E/CHMP2A	51
BP	GO:0097193	intrinsic apoptotic signaling pathway	64/1406	298/18903	6.98096e-15	2.11339e-12	1.5304e-12	HNRNPK/SNW1/UBQLN1/PRKDC/MSH2/MELK/DNAJA1/DDX3X/PTPN1/ABL1/CUL1/SFPQ/PARP1/NONO/HYOU1/PMAIP1/IFI16/MCL1/BAG6/TXNDC12/HDAC1/E2F1/NFE2L2/HIF1A/NCK2/ZNF622/IVNS1ABP/CREB3/TMEM109/ENO1/DDX5/URI1/TP53/KDM1A/BAK1/TP63/TMBIM6/IFI6/YBX3/MAGEA3/SERINC3/SOD2/GRINA/HSPB1/CD74/PERP/PTTG1IP/CD44/PPIA/EIF5A/HINT1/TPT1/MYC/CAV1/SNAI2/P4HB/BCL2L1/PLEKHF1/TNFRSF1A/PHLDA3/RPL11/SLC9A3R1/ZNF385A/RPL26	64
BP	GO:0006413	translational initiation	38/1406	123/18903	1.33038e-14	3.71452e-12	2.68984e-12	EIF4G1/EIF4H/LARP1/KHDRBS1/DENR/PAIP1/EIF4G2/YTHDF2/EIF2S3/DDX3X/TPR/CSDE1/YTHDF1/EIF3A/EIF2AK1/EIF5/DDX1/EIF4EBP2/EIF5B/UHMK1/TMED2/ABCE1/EIF2S2/CDC123/EIF3B/NCK2/EIF3L/EIF4A2/EIF4B/POLR2G/EIF3I/NPM1/HSPB1/SLBP/PPP1CA/RPL13A/BZW2/EIF6	38
BP	GO:0043484	regulation of RNA splicing	47/1406	180/18903	1.35614e-14	3.71452e-12	2.68984e-12	THRAP3/HNRNPU/HNRNPK/SF1/SNW1/PTBP1/HNRNPA2B1/KHDRBS1/PRMT5/HNRNPL/SRPK1/HNRNPH3/RBMX/HSPA8/SRSF1/SON/SF3B3/PTBP3/SRSF3/SRSF7/U2AF2/HNRNPH1/POLR2A/FUS/PRPF19/SF3B4/HNRNPF/SRSF2/SRSF4/NCL/USP22/SRSF9/RBM8A/HNRNPH2/DDX5/MAGOH/DDX17/PUF60/ESRP1/PRDX6/TMBIM6/AHNAK/NPM1/HNRNPA1/C1QBP/SRSF6/SLC38A2	47
BP	GO:0007059	chromosome segregation	74/1406	382/18903	1.70345e-14	4.45374e-12	3.22514e-12	BAZ1B/SMC1A/HNRNPU/ECT2/RACGAP1/KPNB1/NUP62/ACTR2/TOP1/DLGAP5/MKI67/CTCF/CHTF8/PRC1/SMC3/KIF11/ACTR3/STAG2/RAD21/PLK1/KIFC1/ACTL6A/SRPK1/CDCA8/CIAO1/NAA50/NCAPD2/TOP2A/ARID1A/KIF2C/NUSAP1/DDX3X/TPR/CSNK2A1/CDCA5/PLSCR1/SFPQ/DYNC1H1/FEN1/CHMP5/ZWINT/RCC2/MAPRE1/PUM2/SLC25A5/SMARCA5/RAN/CCNB1/FAM83D/SMARCC1/CTNNB1/BAG6/BIRC5/CDC20/TUBG1/CHMP1B/AURKB/CDC42/PTTG1/UBE2C/ACTB/RMI2/RIOK3/ARL8B/CHMP2B/CH…	74
BP	GO:0007051	spindle organization	49/1406	195/18903	1.89077e-14	4.72856e-12	3.42415e-12	SMC1A/HNRNPU/CKAP5/RACGAP1/KPNB1/NUP62/DLGAP5/DCTN1/PRC1/SMC3/KIF11/STAG2/PLK1/KIFC1/CDCA8/TPX2/AURKA/TPR/VCP/DYNC1H1/CHMP5/MAPRE1/LSM14A/CLTC/TUBB/RAN/CCNB1/CCNB2/BIRC5/CDC20/TUBG1/CHMP1B/RHOA/AURKB/MYBL2/MYH9/SBDS/STMN1/DRG1/CHMP2B/CHMP1A/PPP2R1A/RCC1/SUN2/POLDIP2/PLK2/FLNA/EZR/CHMP2A	49
BP	GO:0072594	establishment of protein localization to organelle	82/1406	449/18903	2.01826e-14	4.83709e-12	3.50274e-12	ECT2/NUP153/HUWE1/KPNB1/NUP62/NMT1/IPO5/TNPO3/M6PR/STAT3/SRP72/IPO7/HAX1/MFN2/UBAP1/KPNA2/DNAJA1/LAMP2/HSPA8/TPR/CSE1L/LMAN1/DKC1/HSPA5/SEC61A1/SSR3/SAE1/RALA/CCT5/CCT3/CDK1/UBE2D3/RAN/RAB7A/CALM3/UBL4A/BAG6/TCP1/NOLC1/NCOA4/SREBF2/HSP90AA1/LAMP1/CCT6A/SUMO1/HSPA4/CCT8/CCT4/RAB10/PEX19/SRP9/SCARB2/TOMM20/CCT7/HSPD1/TRIM28/HSP90AB1/TP53/FERMT1/TNFAIP3/HK1/BAG3/TIMM23/TOMM22/TSPO/PHB2/PDCD5/PTTG1IP…	82
BP	GO:2001242	regulation of intrinsic apoptotic signaling pathway	45/1406	172/18903	4.57744e-14	1.05318e-11	7.62649e-12	HNRNPK/UBQLN1/DNAJA1/DDX3X/PTPN1/SFPQ/PARP1/NONO/HYOU1/PMAIP1/MCL1/TXNDC12/HDAC1/NFE2L2/HIF1A/NCK2/IVNS1ABP/CREB3/ENO1/URI1/TP53/KDM1A/TMBIM6/YBX3/MAGEA3/SERINC3/SOD2/GRINA/HSPB1/CD74/PTTG1IP/CD44/PPIA/EIF5A/TPT1/MYC/CAV1/SNAI2/P4HB/BCL2L1/PLEKHF1/RPL11/SLC9A3R1/ZNF385A/RPL26	45
BP	GO:0006457	protein folding	52/1406	223/18903	7.8026e-14	1.72618e-11	1.25e-11	PDIA6/CANX/DNAJA1/KHSRP/HSPA8/CSNK2A1/DNAJC5/ANP32E/LMAN1/PTGES3/HSPA5/HYOU1/CCT5/CCT3/PDIA4/FKBP9/PPIL1/TCP1/HSP90B1/STIP1/VBP1/B2M/HSP90AA1/CCT6A/HSPA4/CCT8/CCT4/CALR/CCDC47/HSPH1/PEX19/HSPA9/CCT7/HSPD1/HSP90AB1/FKBP2/FKBP4/DNAJB1/PDIA3/ST13/BAG3/HSPB1/PPIC/CD74/PDCD5/PRDX4/PPIA/PFDN5/P4HB/FKBP1A/GRN/FKBP10	52
BP	GO:0006403	RNA localization	49/1406	202/18903	8.18983e-14	1.74474e-11	1.26344e-11	XPO1/DHX9/HNRNPU/NUP205/NUP153/CKAP5/KPNB1/NUP62/SMG5/HNRNPA2B1/KHDRBS1/POLDIP3/G3BP2/NSUN2/KHSRP/SRSF1/TPR/STAU1/XPOT/ALKBH5/SRSF3/DKC1/SRSF7/CCT5/CCT3/RAN/IGF2BP2/EIF4A3/TCP1/CASC3/CCT6A/HNRNPAB/NUP210/RBM8A/CCT8/CCT4/TOMM20/CCT7/ALYREF/MAGOH/ZFP36L1/MYO1C/PRPF6/NPM1/SLBP/HNRNPA1/TST/FLOT1/ZNF385A	49
BP	GO:0044000	movement in host	46/1406	183/18903	1.17772e-13	2.41938e-11	1.75198e-11	NUP153/TRIM26/DDB1/PLSCR1/TRIM21/CHMP5/HMGB1/ITGB1/CDK1/RAB7A/TRIM22/SLC7A1/CHMP1B/LAMP1/EFNB2/ITGAV/SCARB2/TFRC/ARL8B/ICAM1/ITGA2/CHMP2B/CAV2/CHMP1A/AXL/DAG1/IFITM1/SNX3/CD74/EGFR/IFITM3/ITGB6/CLDN1/PPIA/ITGB5/FURIN/CAV1/RPSA/P4HB/KRT6A/HLA-DRB1/SLC3A2/CTSB/CTSL/LY6E/CHMP2A	46
BP	GO:0140014	mitotic nuclear division	65/1406	325/18903	1.4811e-13	2.93769e-11	2.1273e-11	BAZ1B/SMC1A/HNRNPU/RACGAP1/KPNB1/NUP62/DLGAP5/MKI67/CHTF8/PRC1/SMC3/KIF11/STAG2/PRMT5/RAD21/PLK1/KIFC1/ACTL6A/ANLN/CDCA8/NAA50/TPX2/NCAPD2/ARID1A/AURKA/KIF2C/NUSAP1/TPR/CDCA5/CHMP5/ZWINT/MAPRE1/LSM14A/SMARCA5/RAN/CDKN1B/CCNB1/SMARCC1/BIRC5/CDC20/TUBG1/CHMP1B/RHOA/AURKB/MYBL2/PPP1R9B/CDC42/PTTG1/DRG1/UBE2C/ACTB/CHMP2B/CAV2/RPL24/CHMP1A/PPP2R1A/SMARCB1/RCC1/KIF22/FBXW5/POLDIP2/PHB2/FLNA/IGF2/CHMP2A	65
BP	GO:0022411	cellular component disassembly	84/1406	483/18903	1.63684e-13	3.13837e-11	2.27262e-11	CKAP5/SUPT16H/HUWE1/UBQLN1/DCTN1/UBQLN4/MTPN/DENR/SSRP1/PLK1/HAX1/CKAP2/TPX2/MFN2/TOP2A/ARID1A/ETF1/LAMP2/AURKA/KIF2C/SET/CAPZA1/HSPA8/VCP/SNAPIN/SPTAN1/ARF6/CHMP5/MAP4K4/ATP2A2/SLC25A5/CDK1/FLII/SMARCC1/LAMC1/ADAM15/SREBF2/SPTBN1/CHMP1B/KIF5B/ABCE1/CTSS/PPP1R9B/LCP1/PLIN3/OPTN/HIF1A/GSPT1/TWF1/STMN1/CTDNEP1/LIMA1/TP53/WDR45B/CHMP2B/HMGA1/CHMP1A/SMARCB1/DNASE2/CALM1/ZMPSTE24/WDR1/TSPO/PHB2/DDR1/P…	84
BP	GO:0019882	antigen processing and presentation	34/1406	108/18903	1.76784e-13	3.2802e-11	2.37533e-11	YTHDF1/TAP1/TAP2/B2M/TAPBP/CTSS/CALR/RAB10/RAB6A/HLA-E/PSMB8/HLA-C/HLA-B/ARL8B/ICAM1/HLA-A/PDIA3/HLA-F/PSME1/HLA-DRA/HLA-DPA1/CD74/CCR7/HLA-DQA1/CTSH/HLA-DQA2/HLA-DMA/THBS1/HLA-DRB1/HLA-DPB1/CTSL/FCER1G/CTSE/HLA-DQB1	34
BP	GO:0050684	regulation of mRNA processing	39/1406	139/18903	1.96924e-13	3.53971e-11	2.56325e-11	THRAP3/DHX9/HNRNPU/HNRNPK/SF1/SNW1/CPSF7/PTBP1/HNRNPA2B1/KHDRBS1/PRMT5/HNRNPL/NUDT21/SRPK1/RBMX/HSPA8/SON/SRSF3/SRSF7/U2AF2/PRPF19/SF3B4/AHCYL1/SRSF2/SRSF4/NCL/SRSF9/RBM8A/DDX5/MAGOH/DDX17/PAF1/PUF60/PRDX6/ZFP36L1/NPM1/HNRNPA1/C1QBP/SRSF6	39
BP	GO:0006913	nucleocytoplasmic transport	65/1406	329/18903	2.67732e-13	4.52939e-11	3.27992e-11	XPO1/DHX9/ECT2/NUP205/NUP153/KPNB1/NUP62/IPO5/TNPO3/STAT3/SMG5/HNRNPA2B1/KHDRBS1/POLDIP3/IPO7/NSUN2/KPNA2/XPO6/TPR/PTPN11/CSE1L/XPOT/ALKBH5/SRSF3/CDK1/RAN/EIF4A3/AHCYL1/NOLC1/ANP32B/CASC3/PPP1CC/HSP90AA1/UHMK1/NUP210/SUMO1/ABCE1/RBM8A/CALR/YWHAE/HSPA9/RANGAP1/RPS15/TRIM28/ALYREF/HSP90AB1/MAGOH/TP53/FERMT1/BAG3/NPM1/PHB2/HNRNPA1/PTTG1IP/IFI27/FLNA/CDH1/TXNIP/MMP12/SQSTM1/EIF6/NFKBIA/TGFB1/JUP/LMNA	65
BP	GO:0051169	nuclear transport	65/1406	329/18903	2.67732e-13	4.52939e-11	3.27992e-11	XPO1/DHX9/ECT2/NUP205/NUP153/KPNB1/NUP62/IPO5/TNPO3/STAT3/SMG5/HNRNPA2B1/KHDRBS1/POLDIP3/IPO7/NSUN2/KPNA2/XPO6/TPR/PTPN11/CSE1L/XPOT/ALKBH5/SRSF3/CDK1/RAN/EIF4A3/AHCYL1/NOLC1/ANP32B/CASC3/PPP1CC/HSP90AA1/UHMK1/NUP210/SUMO1/ABCE1/RBM8A/CALR/YWHAE/HSPA9/RANGAP1/RPS15/TRIM28/ALYREF/HSP90AB1/MAGOH/TP53/FERMT1/BAG3/NPM1/PHB2/HNRNPA1/PTTG1IP/IFI27/FLNA/CDH1/TXNIP/MMP12/SQSTM1/EIF6/NFKBIA/TGFB1/JUP/LMNA	65
BP	GO:0006446	regulation of translational initiation	29/1406	82/18903	3.74327e-13	6.1518e-11	4.45478e-11	EIF4G1/EIF4H/LARP1/KHDRBS1/PAIP1/EIF4G2/YTHDF2/DDX3X/TPR/CSDE1/YTHDF1/EIF2AK1/EIF5/DDX1/EIF4EBP2/EIF5B/UHMK1/TMED2/CDC123/EIF3B/NCK2/EIF4A2/EIF4B/POLR2G/NPM1/HSPB1/PPP1CA/RPL13A/BZW2	29
BP	GO:0000819	sister chromatid segregation	53/1406	239/18903	3.87768e-13	6.19567e-11	4.48655e-11	BAZ1B/SMC1A/HNRNPU/RACGAP1/KPNB1/NUP62/DLGAP5/CTCF/CHTF8/PRC1/SMC3/KIF11/STAG2/RAD21/PLK1/KIFC1/ACTL6A/CDCA8/NAA50/NCAPD2/TOP2A/ARID1A/KIF2C/NUSAP1/TPR/CDCA5/SFPQ/FEN1/CHMP5/ZWINT/MAPRE1/SMARCA5/RAN/CCNB1/SMARCC1/CTNNB1/BIRC5/CDC20/TUBG1/CHMP1B/AURKB/PTTG1/UBE2C/ACTB/RMI2/CHMP2B/CHMP1A/PPP2R1A/SMARCB1/KIF22/PHB2/TOP2B/CHMP2A	53
BP	GO:0006417	regulation of translation	83/1406	486/18903	6.31866e-13	9.82296e-11	7.11321e-11	DHX9/HNRNPU/EIF4G1/EIF4H/PRKDC/PATL1/LARP1/KHDRBS1/MTPN/CNOT1/HNRNPL/POLDIP3/SAMD4B/PAIP1/EIF4G2/YTHDF2/EIF2S3/ETF1/CAPRIN1/SYNCRIP/KHSRP/DDX3X/TPR/CSDE1/LSM14B/YTHDF1/LSM14A/EIF2AK1/PUM2/EIF5/DDX1/IGF2BP2/EIF4A3/TYMS/CNBP/APP/NOLC1/CASC3/HNRNPD/NCL/EIF4EBP2/EIF5B/UHMK1/ILF3/RHOA/TMED2/ABCE1/RBM8A/CALR/CDC123/EIF3B/NCK2/SRP9/GSPT1/MAGOH/EIF4A2/ITGA2/EIF4B/POLR2G/ZFP36L1/YBX3/SOX4/TNKS1BP1/SHMT2/N…	83
BP	GO:0090307	mitotic spindle assembly	27/1406	74/18903	1.02081e-12	1.54518e-10	1.11893e-10	SMC1A/HNRNPU/RACGAP1/KPNB1/PRC1/SMC3/KIF11/STAG2/PLK1/KIFC1/CDCA8/TPX2/TPR/CHMP5/LSM14A/BIRC5/CDC20/CHMP1B/RHOA/AURKB/MYBL2/DRG1/CHMP2B/CHMP1A/POLDIP2/FLNA/CHMP2A	27
BP	GO:0048024	regulation of mRNA splicing, via spliceosome	33/1406	109/18903	1.36755e-12	2.01697e-10	1.46057e-10	THRAP3/HNRNPU/HNRNPK/SF1/SNW1/PTBP1/HNRNPA2B1/KHDRBS1/PRMT5/HNRNPL/SRPK1/RBMX/HSPA8/SON/SRSF3/SRSF7/U2AF2/PRPF19/SF3B4/SRSF2/SRSF4/NCL/SRSF9/RBM8A/DDX5/MAGOH/DDX17/PUF60/PRDX6/NPM1/HNRNPA1/C1QBP/SRSF6	33
BP	GO:1903312	negative regulation of mRNA metabolic process	30/1406	94/18903	3.13551e-12	4.50886e-10	3.26506e-10	THRAP3/DHX9/HNRNPU/HNRNPK/PTBP1/LARP1/HNRNPA2B1/HNRNPL/HNRNPC/PAIP1/RBMX/SYNCRIP/CSDE1/SRSF7/U2AF2/IGF2BP2/FUS/MAPKAPK2/HNRNPD/SRSF4/SRSF9/HNRNPAB/E2F1/MYD88/YBX3/PKP3/NPM1/C1QBP/PKP1/SRSF6	30
BP	GO:2001234	negative regulation of apoptotic signaling pathway	50/1406	233/18903	6.56789e-12	9.21427e-10	6.67243e-10	PSME3/DNAJA1/DDX3X/PTPN1/CSNK2A1/PSMD10/MAZ/NONO/SLC25A5/HYOU1/CTNNA1/CTNNB1/MCL1/TXNDC12/HDAC1/HMGB2/TMEM14A/NFE2L2/ITGAV/HIF1A/IVNS1ABP/CREB3/GHITM/ENO1/URI1/PEA15/KDM1A/ITGA6/ICAM1/BAK1/TNFAIP3/TMBIM6/IFI6/YBX3/RAF1/MAGEA3/SOD2/GRINA/HSPB1/CD74/GNAI2/PTTG1IP/CD44/PPIA/TPT1/SNAI2/BCL2L1/THBS1/LMNA/ZNF385A	50
BP	GO:0098813	nuclear chromosome segregation	61/1406	321/18903	8.27895e-12	1.12475e-09	8.14475e-10	BAZ1B/SMC1A/HNRNPU/ECT2/RACGAP1/KPNB1/NUP62/ACTR2/DLGAP5/CTCF/CHTF8/PRC1/SMC3/KIF11/ACTR3/STAG2/RAD21/PLK1/KIFC1/ACTL6A/CDCA8/NAA50/NCAPD2/TOP2A/ARID1A/KIF2C/NUSAP1/TPR/CDCA5/SFPQ/DYNC1H1/FEN1/CHMP5/ZWINT/RCC2/MAPRE1/SMARCA5/RAN/CCNB1/FAM83D/SMARCC1/CTNNB1/BAG6/BIRC5/CDC20/TUBG1/CHMP1B/AURKB/CDC42/PTTG1/UBE2C/ACTB/RMI2/CHMP2B/CHMP1A/PPP2R1A/SMARCB1/KIF22/PHB2/TOP2B/CHMP2A	61
BP	GO:1900180	regulation of protein localization to nucleus	36/1406	135/18903	8.54217e-12	1.12475e-09	8.14475e-10	DTX3L/ECT2/IPO5/PARP9/PLK1/TPR/PARP1/DKC1/CCT5/CCT3/CDK1/SUMO3/RAN/CTNNA1/TCP1/NOLC1/HSP90AA1/CCT6A/SUMO1/CCT8/CCT4/CCT7/TRIM28/HSP90AB1/TFRC/FERMT1/BAG3/NPM1/MAGED1/GLUL/TRIM29/FLNA/CDH1/TGFB1/JUP/LMNA	36
BP	GO:0050792	regulation of viral process	40/1406	162/18903	8.60376e-12	1.12475e-09	8.14475e-10	ADAR/DHX9/OAS3/LARP1/TRIM26/STAT1/SRPK1/TOP2A/KPNA2/DDB1/DDX3X/STAU1/PLSCR1/IFIH1/TRIM21/OAS2/HMGB1/RAD23A/RAB7A/IFI16/TRIM22/MX1/ILF3/TRIM28/TNIP1/OAS1/IFIT1/AXL/IFITM1/SNX3/CD74/IFITM3/STOM/PPIA/FURIN/BST2/P4HB/HLA-DRB1/LY6E/TOP2B	40
BP	GO:0002478	antigen processing and presentation of exogenous peptide antigen	19/1406	40/18903	9.29091e-12	1.16915e-09	8.46629e-10	TAP1/TAP2/B2M/CTSS/HLA-E/HLA-A/HLA-F/HLA-DRA/HLA-DPA1/CD74/HLA-DQA1/HLA-DQA2/HLA-DMA/HLA-DRB1/HLA-DPB1/CTSL/FCER1G/CTSE/HLA-DQB1	19
BP	GO:0048002	antigen processing and presentation of peptide antigen	24/1406	64/18903	9.34994e-12	1.16915e-09	8.46629e-10	TAP1/TAP2/B2M/TAPBP/CTSS/CALR/HLA-E/HLA-C/HLA-B/HLA-A/PDIA3/HLA-F/HLA-DRA/HLA-DPA1/CD74/HLA-DQA1/HLA-DQA2/HLA-DMA/HLA-DRB1/HLA-DPB1/CTSL/FCER1G/CTSE/HLA-DQB1	24
BP	GO:0019079	viral genome replication	35/1406	130/18903	1.23385e-11	1.51002e-09	1.09347e-09	ADAR/DEK/OAS3/LARP1/SRPK1/TOP2A/PCBP1/DDB1/HSPA8/DDX3X/VCP/STAU1/PLSCR1/IFIH1/HTATSF1/OAS2/NUCKS1/RAD23A/IFI16/MX1/ILF3/PCBP2/TRIM28/TNIP1/OAS1/SMARCB1/IFIT1/IFITM1/IFITM3/STOM/PPIA/IFI27/BST2/EEF1A1/TOP2B	35
BP	GO:0009615	response to virus	71/1406	409/18903	1.40509e-11	1.68376e-09	1.21928e-09	ADAR/DHX9/DTX3L/OAS3/PARP9/HNRNPUL1/TRIM26/STAT1/DDX21/DDX3X/PLSCR1/JAK1/IFIH1/TRIM21/OAS2/SAMHD1/RNF26/LSM14A/PUM2/STAT2/DDX60/PMAIP1/CCT5/DDX1/GBP1/IFI16/TRIM22/MX1/IRF1/IFI44/HSP90AA1/ILF3/CALR/PCBP2/HIF1A/MYD88/IFIT3/IVNS1ABP/STMN1/ENO1/TRIM28/URI1/RIOK3/ARF1/DDX17/TNFAIP3/IFNGR2/IRF7/CXCL9/IFI6/OAS1/IFNGR1/AIM2/ODC1/IFIT1/CXCL10/SERINC3/ZMPSTE24/IFITM1/PHB2/HSPB1/IFITM3/ITGB6/EIF5A/IFI27/BST…	71
BP	GO:0072331	signal transduction by p53 class mediator	41/1406	173/18903	1.93617e-11	2.27283e-09	1.64585e-09	HNRNPK/SNW1/FOXM1/MSH2/PRMT5/AURKA/PSMD10/COPS3/PMAIP1/CDKN1B/IFI16/BAG6/AURKB/E2F1/USP7/TMEM109/RPS15/DDX5/TP53/KDM1A/TP63/RPS20/SOX4/ZMPSTE24/NPM1/BATF/CD74/PERP/PLK2/PTTG1IP/CD44/EIF5A/HINT1/MYC/SNAI2/PHLDA3/NDRG1/RPL37/RPL11/ZNF385A/RPL26	41
BP	GO:0034341	response to interferon-gamma	36/1406	140/18903	2.68687e-11	3.09097e-09	2.2383e-09	ACTR2/PARP9/PARP14/ACTR3/STAT1/SYNCRIP/NUB1/JAK1/TRIM21/VAMP3/GBP1/CD47/IRF1/GBP4/KIF5B/CDC42/FLNB/ACTG1/TP53/CDC42EP4/IFNGR2/MYO1C/IFNGR1/CXCL16/IFITM1/HLA-DPA1/CD74/ZYX/GBP2/IFITM3/CLDN1/RPL13A/BST2/UBD/CCL20/GAPDH	36
BP	GO:1903900	regulation of viral life cycle	36/1406	142/18903	4.17583e-11	4.68503e-09	3.39263e-09	ADAR/OAS3/LARP1/TRIM26/SRPK1/TOP2A/KPNA2/DDB1/DDX3X/STAU1/PLSCR1/IFIH1/TRIM21/OAS2/HMGB1/RAD23A/IFI16/TRIM22/MX1/ILF3/TRIM28/TNIP1/OAS1/IFIT1/AXL/IFITM1/SNX3/CD74/IFITM3/PPIA/FURIN/BST2/P4HB/HLA-DRB1/LY6E/TOP2B	36
BP	GO:0031647	regulation of protein stability	60/1406	325/18903	4.24103e-11	4.68503e-09	3.39263e-09	HCFC1/PRKDC/PLK1/LAMP2/AURKA/HSPA8/TRIM21/PTGES3/CCT5/DVL3/CCT3/RAD23A/UBL4A/CTNND1/BAG6/TCP1/VBP1/HSP90AA1/LAMP1/CCT6A/B4GALT5/SUMO1/DDOST/CCT8/CCT4/CALR/GLMP/USP7/SERF2/PEX19/PFN2/CCT7/HSPD1/HSP90AB1/URI1/DAZAP2/TP53/PRNP/SEC16A/ATP1B1/ATP1B3/BAG3/SOX4/RTN4/NPM1/PHB2/RNF5/FLNA/CTSH/PFDN5/DAD1/FLOT1/CMTM6/TESC/PFN1/GRN/RPL11/EFNA1/GAPDH/LMNA	60
BP	GO:0034250	positive regulation of cellular amide metabolic process	40/1406	170/18903	4.31688e-11	4.68503e-09	3.39263e-09	DHX9/HNRNPU/EIF4G1/PRKDC/LARP1/KHDRBS1/HNRNPL/POLDIP3/PAIP1/YTHDF2/EIF2S3/SYNCRIP/DDX3X/CSDE1/YTHDF1/PICALM/EIF4A3/CNBP/HNRNPD/UHMK1/RHOA/NFE2L2/CDC123/NCK2/ITGA2/POLR2G/IFNGR1/YBX3/SOX4/NPM1/RPS9/EIF5A/C1QBP/PKM/EEF2/PLXNB2/THBS1/EIF6/EFNA1/RPL26	40
BP	GO:0045727	positive regulation of translation	36/1406	143/18903	5.18727e-11	5.5254e-09	4.00117e-09	DHX9/HNRNPU/EIF4G1/PRKDC/LARP1/KHDRBS1/HNRNPL/POLDIP3/PAIP1/YTHDF2/EIF2S3/SYNCRIP/DDX3X/CSDE1/YTHDF1/EIF4A3/CNBP/HNRNPD/UHMK1/RHOA/CDC123/NCK2/ITGA2/POLR2G/YBX3/SOX4/NPM1/RPS9/EIF5A/C1QBP/PKM/EEF2/PLXNB2/THBS1/EIF6/RPL26	36
BP	GO:1900182	positive regulation of protein localization to nucleus	27/1406	87/18903	7.84591e-11	8.20539e-09	5.94187e-09	DTX3L/ECT2/IPO5/PARP9/PLK1/TPR/PARP1/DKC1/CCT5/CCT3/CDK1/RAN/TCP1/HSP90AA1/CCT6A/CCT8/CCT4/CCT7/TRIM28/HSP90AB1/TFRC/BAG3/NPM1/FLNA/CDH1/TGFB1/JUP	27
BP	GO:0019884	antigen processing and presentation of exogenous antigen	20/1406	49/18903	8.22199e-11	8.44516e-09	6.11549e-09	TAP1/TAP2/B2M/CTSS/HLA-E/HLA-A/HLA-F/PSME1/HLA-DRA/HLA-DPA1/CD74/HLA-DQA1/HLA-DQA2/HLA-DMA/HLA-DRB1/HLA-DPB1/CTSL/FCER1G/CTSE/HLA-DQB1	20
BP	GO:0000070	mitotic sister chromatid segregation	44/1406	204/18903	1.00859e-10	1.01779e-08	7.37022e-09	BAZ1B/SMC1A/HNRNPU/RACGAP1/KPNB1/NUP62/DLGAP5/CHTF8/PRC1/SMC3/KIF11/RAD21/PLK1/KIFC1/ACTL6A/CDCA8/NAA50/NCAPD2/ARID1A/KIF2C/NUSAP1/TPR/CDCA5/CHMP5/ZWINT/MAPRE1/SMARCA5/RAN/CCNB1/SMARCC1/BIRC5/CDC20/TUBG1/CHMP1B/AURKB/PTTG1/UBE2C/ACTB/CHMP2B/CHMP1A/PPP2R1A/SMARCB1/KIF22/CHMP2A	44
BP	GO:0061077	chaperone-mediated protein folding	24/1406	71/18903	1.18951e-10	1.17966e-08	8.54244e-09	HSPA8/CSNK2A1/DNAJC5/PTGES3/HSPA5/CCT5/CCT3/PDIA4/TCP1/CCT6A/CCT8/CCT4/HSPH1/PEX19/HSPA9/CCT7/FKBP2/FKBP4/DNAJB1/ST13/HSPB1/CD74/PDCD5/FKBP1A	24
BP	GO:0044772	mitotic cell cycle phase transition	76/1406	473/18903	1.24009e-10	1.20898e-08	8.75475e-09	PSME3/EIF4G1/DLGAP5/PRKDC/TFDP1/FOXM1/RRM1/KHDRBS1/MELK/CCNA2/RAD21/PLK1/CTDSP2/ACTL6A/ANLN/CDCA8/ARID1A/AURKA/DDB1/DDX3X/TPR/CDCA5/CUL1/CKS1B/ZWINT/RCC2/ITGB1/PPP2CA/ARPP19/CDK1/NASP/CDKN1B/CCNB1/CALM3/SMARCC1/CCNB2/CDK2/APP/RPA2/CALM2/BIRC5/CDC20/CDC25B/E2F4/CCNI/AURKB/RRM2/PPP1R9B/E2F1/GSPT1/CDKN2A/CDKN2B/UBE2C/ACTB/TP53/APEX1/ZFP36L1/RPL24/PSME1/SMARCB1/RCC1/CDK4/CALM1/PHB2/ENSA/EGFR/PLK2/CKS…	76
BP	GO:2001243	negative regulation of intrinsic apoptotic signaling pathway	29/1406	101/18903	1.2967e-10	1.2283e-08	8.89461e-09	DNAJA1/DDX3X/PTPN1/NONO/HYOU1/MCL1/TXNDC12/HDAC1/NFE2L2/HIF1A/IVNS1ABP/CREB3/ENO1/URI1/KDM1A/TMBIM6/YBX3/MAGEA3/SOD2/GRINA/HSPB1/CD74/PTTG1IP/CD44/PPIA/TPT1/SNAI2/BCL2L1/ZNF385A	29
BP	GO:0033044	regulation of chromosome organization	50/1406	252/18903	1.30261e-10	1.2283e-08	8.89461e-09	BAZ1B/HNRNPU/DNMT1/DLGAP5/CTCF/SMG5/HNRNPA2B1/MCM2/RAD21/PLK1/HNRNPC/ACTL6A/CDCA8/NCAPD2/TOP2A/ARID1A/TINF2/TPR/CDCA5/SFPQ/FEN1/PARP1/ZWINT/DKC1/SMARCA5/CCT5/CCT3/CCNB1/SMARCC1/CTNNB1/TCP1/XRCC5/CDK2/HNRNPD/BIRC5/CDC20/CCT6A/AURKB/CCT8/CCT4/USP7/PTTG1/CCT7/TRIM28/UBE2C/ACTB/RMI2/SMARCB1/HNRNPA1/MYC	50
BP	GO:0051225	spindle assembly	33/1406	128/18903	1.66381e-10	1.54359e-08	1.11778e-08	SMC1A/HNRNPU/RACGAP1/KPNB1/PRC1/SMC3/KIF11/STAG2/PLK1/KIFC1/CDCA8/TPX2/AURKA/TPR/DYNC1H1/CHMP5/MAPRE1/LSM14A/TUBB/CCNB2/BIRC5/CDC20/CHMP1B/RHOA/AURKB/MYBL2/DRG1/CHMP2B/CHMP1A/RCC1/POLDIP2/FLNA/CHMP2A	33
BP	GO:0043161	proteasome-mediated ubiquitin-dependent protein catabolic process	73/1406	450/18903	1.85771e-10	1.69612e-08	1.22823e-08	XPO1/HUWE1/DCAF12/UBQLN1/UBQLN4/PSMD2/USP14/PLK1/CANX/AURKA/DDB1/PSMD10/NUB1/VCP/PSMB2/UBXN4/CUL1/PSMC2/RAD23B/HSPA5/PSMD1/PCNP/UBQLN2/RNF19B/UBE2D3/TNFAIP1/RAD23A/USP5/SMARCC1/CTNNB1/BAG6/CDK2/HSP90B1/GNA12/PSMD7/CDC20/SDCBP/SUMO1/SUMO2/UBE2H/PSMD11/NFE2L2/CALR/CCDC47/PCBP2/USP7/TBL1XR1/PSMC3/PSMB5/PSMA3/PSMA7/HSP90AB1/UBE2C/PSMD8/TRPC4AP/STT3B/PSMD3/PSMD4/PSMB4/OS9/FBXW5/KLHDC3/RNF187/RNF5/PSMB…	73
BP	GO:0000281	mitotic cytokinesis	26/1406	85/18903	2.50977e-10	2.25565e-08	1.63341e-08	ECT2/RACGAP1/NUP62/PLK1/ANLN/CDCA8/CKAP2/CEP55/NUSAP1/SON/KIF20A/CHMP5/BIRC5/SPTBN1/CHMP1B/RHOA/AURKB/STMN1/ARF1/CHMP2B/CHMP1A/POLDIP2/JTB/RHOC/CFL1/CHMP2A	26
BP	GO:0044409	entry into host	37/1406	158/18903	2.65869e-10	2.35273e-08	1.70371e-08	NUP153/TRIM26/PLSCR1/TRIM21/HMGB1/ITGB1/CDK1/TRIM22/SLC7A1/LAMP1/EFNB2/ITGAV/SCARB2/TFRC/ICAM1/ITGA2/CAV2/AXL/DAG1/IFITM1/SNX3/CD74/EGFR/IFITM3/ITGB6/CLDN1/ITGB5/FURIN/CAV1/RPSA/P4HB/KRT6A/HLA-DRB1/SLC3A2/CTSB/CTSL/LY6E	37
BP	GO:0046718	viral entry into host cell	36/1406	151/18903	2.71259e-10	2.36407e-08	1.71192e-08	NUP153/TRIM26/PLSCR1/TRIM21/HMGB1/ITGB1/CDK1/TRIM22/SLC7A1/LAMP1/EFNB2/ITGAV/SCARB2/TFRC/ICAM1/ITGA2/CAV2/AXL/DAG1/IFITM1/SNX3/CD74/EGFR/IFITM3/ITGB6/CLDN1/ITGB5/FURIN/CAV1/RPSA/P4HB/HLA-DRB1/SLC3A2/CTSB/CTSL/LY6E	36
BP	GO:0031589	cell-substrate adhesion	63/1406	369/18903	4.05339e-10	3.46231e-08	2.5072e-08	PIP5K1A/ABL1/PTPRA/MAP4K4/RCC2/ITGB1/VAMP3/GBP1/CTNNB1/LAMC1/TLN1/RAB1A/ADAM15/CORO1C/RIN2/RHOA/CALR/ITGAV/ACTN4/CDKN2A/CDC42/ACTG1/ITGA6/ITGA2/FERMT1/ACTN1/ADAM9/COL17A1/RAC1/JAG1/AXL/ITGB4/DAG1/ITGA3/LAMB3/POLDIP2/DDR1/ZYX/ARPC2/LAMB1/CCR7/FN1/ITGB6/MDK/RAC2/CD44/CRKL/MSLN/CD63/ITGB5/MMP14/PLAU/C1QBP/FLNA/P4HB/MMP12/THBS1/FBLN2/RHOD/ID1/EFNA1/JUP/CIB1	63
BP	GO:0051054	positive regulation of DNA metabolic process	55/1406	301/18903	4.09313e-10	3.46231e-08	2.5072e-08	DHX9/USP1/DTX3L/ACTR2/PRKDC/FOXM1/PARP9/CHTF8/MSH2/HNRNPA2B1/TIMELESS/ACTL6A/ARID1A/CIZ1/TINF2/PARP1/DKC1/PTGES3/HMGB1/SMARCA5/PCNA/CCT5/CCT3/CDK1/RFC2/TNFAIP1/FUS/SMARCC1/CTNNB1/TCP1/RFC4/XRCC5/CDK2/MORF4L1/HNRNPD/HMCES/HSP90AA1/MORF4L2/CCT6A/HNRNPAB/AURKB/STOML2/CCT8/CCT4/USP7/CCT7/TRIM28/HSP90AB1/ACTB/TFRC/SMARCB1/EGFR/HNRNPA1/MYC/TGFB1	55
BP	GO:0032386	regulation of intracellular transport	59/1406	336/18903	4.78725e-10	3.99076e-08	2.88988e-08	XPO1/DHX9/ECT2/NUP153/HUWE1/NMT1/IPO5/KHDRBS1/HAX1/NSUN2/PTPN1/TPR/PTPN11/SNAPIN/DYNC1H1/LMAN1/SNX12/SAE1/CDK1/UBE2D3/RAN/NOLC1/ANP32B/SREBF2/PPP1CC/HSP90AA1/UHMK1/LAMP1/SUMO1/LCP1/YWHAE/USP7/GDI1/MSN/RANGAP1/TRIM28/TM9SF4/HSP90AB1/TMEM30A/FERMT1/MYO1C/PRNP/BAG3/OS9/SNX3/PDCD5/REEP6/EHD2/RAC2/STOM/IFI27/UBL5/FLNA/ANXA2/CDH1/TGFB1/JUP/EZR/CIB1	59
BP	GO:0048524	positive regulation of viral process	22/1406	64/18903	4.87031e-10	4.002e-08	2.89802e-08	ADAR/DHX9/LARP1/SRPK1/TOP2A/KPNA2/DDB1/DDX3X/STAU1/TRIM21/HMGB1/RAD23A/RAB7A/IFIT1/AXL/CD74/STOM/PPIA/FURIN/P4HB/HLA-DRB1/TOP2B	22
BP	GO:1903829	positive regulation of protein localization	72/1406	451/18903	5.14773e-10	4.17039e-08	3.01995e-08	DTX3L/ECT2/HUWE1/NUP62/NMT1/IPO5/PARP9/ATP2C1/PLK1/TPR/ZDHHC5/ARF6/PARP1/DKC1/ITGB1/GOLPH3/SAE1/CCT5/CCT3/OXCT1/CDK1/UBE2D3/RAN/TMED10/TCP1/ANP32B/SREBF2/SPTBN1/HSP90AA1/CCT6A/KIF5B/CCT8/PPP1R9B/CCT4/YWHAE/HIF1A/MSN/CCT7/TRIM28/TM9SF4/HSP90AB1/TMEM30A/TM7SF3/TFRC/LRRC8A/ADAM9/MYO1C/PRNP/BAG3/RAB38/SOX4/RTN4/ITGA3/NPM1/PDCD5/EGFR/RAC2/STOM/PPIA/GLUL/UBL5/RHOG/KCNN4/FLNA/ANO1/CDH1/HLA-DRB1/SQSTM1/T…	72
BP	GO:0000280	nuclear division	75/1406	481/18903	6.71453e-10	5.36416e-08	3.88441e-08	BAZ1B/SMC1A/HNRNPU/RACGAP1/KPNB1/NUP62/ACTR2/DLGAP5/MKI67/CHTF8/PRC1/SMC3/KIF11/ACTR3/STAG2/PRMT5/RAD21/PLK1/KIFC1/ACTL6A/ANLN/CDCA8/NAA50/TPX2/NCAPD2/TOP2A/ARID1A/AURKA/KIF2C/NUSAP1/TPR/CDCA5/CHMP5/ZWINT/MAPRE1/LSM14A/SMARCA5/RAN/CDKN1B/CCNB1/SMARCC1/CCNB2/BAG6/BIRC5/CDC20/CDC25B/TUBG1/CHMP1B/RHOA/AURKB/MYBL2/PPP1R9B/CALR/CDC42/PTTG1/DRG1/UBE2C/ACTB/CHMP2B/CAV2/RPL24/CHMP1A/PPP2R1A/SMARCB1/RCC1/…	75
BP	GO:0006401	RNA catabolic process	54/1406	299/18903	9.16768e-10	7.15349e-08	5.18014e-08	THRAP3/DHX9/HNRNPU/XRN2/PPP1R8/PATL1/SMG5/LARP1/SERBP1/CNOT1/HNRNPM/HNRNPC/SAMD4B/PAIP1/YTHDF2/NSUN2/ETF1/SYNCRIP/KHSRP/CSDE1/ALKBH5/YTHDF1/FEN1/OAS2/WDR82/DKC1/PUM2/SND1/IGF2BP2/EIF4A3/FUS/MAPKAPK2/CASC3/HNRNPD/HNRNPAB/RNASEH2A/RBM8A/E2F1/MYD88/GSPT1/DDX5/MAGOH/CARHSP1/POLR2G/LSM2/APEX1/ZFP36L1/YBX3/PKP3/TNKS1BP1/NPM1/ZFP36L2/LSM7/PKP1	54
BP	GO:0000910	cytokinesis	40/1406	187/18903	9.20303e-10	7.15349e-08	5.18014e-08	ECT2/RACGAP1/NUP62/ACTR2/PRC1/ACTR3/PLK1/ANLN/CDCA8/CKAP2/AURKA/CEP55/NUSAP1/SON/KIF20A/CHMP5/CALM3/CALM2/BIRC5/SPTBN1/CDC25B/CHMP1B/RHOA/AURKB/MYH9/GIT1/CDC42/PLEC/STMN1/ARF1/CHMP2B/CHMP1A/CALM1/POLDIP2/PLK2/JTB/RHOC/BCL2L1/CFL1/CHMP2A	40
BP	GO:0051168	nuclear export	37/1406	165/18903	9.79033e-10	7.50853e-08	5.43724e-08	XPO1/DHX9/NUP153/NUP62/SMG5/HNRNPA2B1/KHDRBS1/POLDIP3/NSUN2/XPO6/TPR/PTPN11/CSE1L/XPOT/ALKBH5/SRSF3/RAN/EIF4A3/AHCYL1/ANP32B/CASC3/UHMK1/ABCE1/RBM8A/CALR/YWHAE/HSPA9/RANGAP1/RPS15/ALYREF/MAGOH/BAG3/NPM1/HNRNPA1/IFI27/EIF6/TGFB1	37
BP	GO:0042176	regulation of protein catabolic process	61/1406	361/18903	1.16895e-09	8.8471e-08	6.40656e-08	XPO1/UBQLN1/PSME3/UBQLN4/PSMD2/USP14/PLK1/AURKA/DDB1/CSNK2A1/PSMD10/NUB1/VCP/PSMC2/RAD23B/SF3B3/SNX12/PSMD1/UBQLN2/RNF19B/RAD23A/RAB7A/CDKN1B/USP5/FAM83D/SMARCC1/BAG6/CDK2/GNA12/CDC20/HSP90AA1/SDCBP/SUMO1/SUMO2/LAPTM4B/NFE2L2/USP7/PSMC3/MSN/HSP90AB1/AZIN1/TNFAIP3/PSMD3/ADAM9/PSME1/ODC1/SOX9/SNX3/EGFR/PLK2/PSMC4/PSME2/FURIN/FLNA/CAV1/ANXA2/CDH1/RPL11/EEF1A1/EZR/CST3	61
BP	GO:0002504	antigen processing and presentation of peptide or polysaccharide antigen via MHC class II	16/1406	36/18903	1.41411e-09	1.05636e-07	7.64952e-08	B2M/CTSS/ARL8B/HLA-DRA/HLA-DPA1/CD74/HLA-DQA1/HLA-DQA2/HLA-DMA/THBS1/HLA-DRB1/HLA-DPB1/CTSL/FCER1G/CTSE/HLA-DQB1	16
BP	GO:0050821	protein stabilization	43/1406	214/18903	1.69699e-09	1.25142e-07	9.06208e-08	HCFC1/LAMP2/PTGES3/CCT5/DVL3/CCT3/CTNND1/BAG6/TCP1/VBP1/HSP90AA1/LAMP1/CCT6A/SUMO1/CCT8/CCT4/CALR/GLMP/USP7/PEX19/PFN2/CCT7/HSPD1/HSP90AB1/URI1/TP53/SEC16A/ATP1B1/ATP1B3/BAG3/SOX4/RTN4/NPM1/PHB2/FLNA/PFDN5/FLOT1/TESC/PFN1/GRN/RPL11/EFNA1/GAPDH	43
BP	GO:0002396	MHC protein complex assembly	12/1406	20/18903	1.96808e-09	1.41505e-07	1.0247e-07	B2M/TAPBP/CALR/PDIA3/HLA-DRA/HLA-DPA1/HLA-DQA1/HLA-DQA2/HLA-DMA/HLA-DRB1/HLA-DPB1/HLA-DQB1	12
BP	GO:0002501	peptide antigen assembly with MHC protein complex	12/1406	20/18903	1.96808e-09	1.41505e-07	1.0247e-07	B2M/TAPBP/CALR/PDIA3/HLA-DRA/HLA-DPA1/HLA-DQA1/HLA-DQA2/HLA-DMA/HLA-DRB1/HLA-DPB1/HLA-DQB1	12
BP	GO:0033119	negative regulation of RNA splicing	14/1406	28/18903	2.2139e-09	1.57215e-07	1.13846e-07	HNRNPK/PTBP1/HNRNPA2B1/HNRNPL/RBMX/PTBP3/SRSF7/U2AF2/SRSF4/SRSF9/TMBIM6/NPM1/C1QBP/SRSF6	14
BP	GO:0006402	mRNA catabolic process	47/1406	248/18903	2.25461e-09	1.58152e-07	1.14525e-07	THRAP3/DHX9/HNRNPU/XRN2/PATL1/SMG5/LARP1/SERBP1/CNOT1/HNRNPM/HNRNPC/SAMD4B/PAIP1/YTHDF2/ETF1/SYNCRIP/KHSRP/CSDE1/ALKBH5/YTHDF1/PUM2/SND1/IGF2BP2/EIF4A3/FUS/MAPKAPK2/CASC3/HNRNPD/HNRNPAB/RBM8A/E2F1/MYD88/GSPT1/DDX5/MAGOH/CARHSP1/POLR2G/LSM2/APEX1/ZFP36L1/YBX3/PKP3/TNKS1BP1/NPM1/ZFP36L2/LSM7/PKP1	47
BP	GO:0061640	cytoskeleton-dependent cytokinesis	29/1406	113/18903	2.36648e-09	1.64e-07	1.18759e-07	ECT2/RACGAP1/NUP62/ACTR2/ACTR3/PLK1/ANLN/CDCA8/CKAP2/CEP55/NUSAP1/SON/KIF20A/CHMP5/BIRC5/SPTBN1/CHMP1B/RHOA/AURKB/PLEC/STMN1/ARF1/CHMP2B/CHMP1A/POLDIP2/JTB/RHOC/CFL1/CHMP2A	29
BP	GO:0006986	response to unfolded protein	33/1406	141/18903	2.47271e-09	1.69164e-07	1.22498e-07	DAXX/MFN2/DNAJA1/HSPA8/PTPN1/VCP/UBXN4/HSPA5/ATF6B/HSP90AA1/TMED2/HSPA4/NFE2L2/OPTN/HSPH1/NCK2/HSPA9/CREB3/HSPD1/HSP90AB1/TM7SF3/BAK1/STT3B/DNAJB1/TMBIM6/BAG3/OS9/HSPB1/SERPINH1/THBS1/ERMP1/TRAM1/HSPB8	33
BP	GO:0050657	nucleic acid transport	36/1406	163/18903	2.5459e-09	1.69164e-07	1.22498e-07	XPO1/DHX9/NUP205/NUP153/CKAP5/KPNB1/NUP62/SMG5/HNRNPA2B1/KHDRBS1/POLDIP3/G3BP2/NSUN2/KHSRP/SRSF1/TPR/XPOT/ALKBH5/SRSF3/SRSF7/RAN/IGF2BP2/EIF4A3/CASC3/NUP210/RBM8A/TOMM20/ALYREF/MAGOH/ZFP36L1/MYO1C/NPM1/SLBP/HNRNPA1/TST/FLOT1	36
BP	GO:0050658	RNA transport	36/1406	163/18903	2.5459e-09	1.69164e-07	1.22498e-07	XPO1/DHX9/NUP205/NUP153/CKAP5/KPNB1/NUP62/SMG5/HNRNPA2B1/KHDRBS1/POLDIP3/G3BP2/NSUN2/KHSRP/SRSF1/TPR/XPOT/ALKBH5/SRSF3/SRSF7/RAN/IGF2BP2/EIF4A3/CASC3/NUP210/RBM8A/TOMM20/ALYREF/MAGOH/ZFP36L1/MYO1C/NPM1/SLBP/HNRNPA1/TST/FLOT1	36
BP	GO:0045936	negative regulation of phosphate metabolic process	69/1406	440/18903	2.55863e-09	1.69164e-07	1.22498e-07	ADAR/HNRNPU/PAK2/NUP62/IPO5/SNX6/EIF4G1/PPP1R8/PRKDC/STAT3/PARP14/PLK1/CTDSP2/IPO7/YWHAG/IQGAP1/DNAJA1/PTPN1/ABL1/PARP1/PRKAR1A/PPP2CA/ARPP19/CDKN1B/CALM3/PIP4K2C/PPP1R11/CORO1C/CALM2/TAF7/TMED2/PPP1R9B/YWHAE/NCK2/CDKN2A/GIT1/CDKN2B/PLEC/URI1/TP53/YWHAB/BAK1/TNFAIP3/PRDX3/PRNP/PPP2R1A/DYNLL1/CALM1/CADM4/NPM1/TSPO/HSPB1/ENSA/GNAI2/CRKL/SPINK1/PPIA/CDA/JUN/CAV1/PMEPA1/GADD45A/FKBP1A/FBP1/TGFB1/IGFB…	69
BP	GO:0010563	negative regulation of phosphorus metabolic process	69/1406	441/18903	2.81884e-09	1.8425e-07	1.33423e-07	ADAR/HNRNPU/PAK2/NUP62/IPO5/SNX6/EIF4G1/PPP1R8/PRKDC/STAT3/PARP14/PLK1/CTDSP2/IPO7/YWHAG/IQGAP1/DNAJA1/PTPN1/ABL1/PARP1/PRKAR1A/PPP2CA/ARPP19/CDKN1B/CALM3/PIP4K2C/PPP1R11/CORO1C/CALM2/TAF7/TMED2/PPP1R9B/YWHAE/NCK2/CDKN2A/GIT1/CDKN2B/PLEC/URI1/TP53/YWHAB/BAK1/TNFAIP3/PRDX3/PRNP/PPP2R1A/DYNLL1/CALM1/CADM4/NPM1/TSPO/HSPB1/ENSA/GNAI2/CRKL/SPINK1/PPIA/CDA/JUN/CAV1/PMEPA1/GADD45A/FKBP1A/FBP1/TGFB1/IGFB…	69
BP	GO:0051098	regulation of binding	61/1406	372/18903	3.85527e-09	2.49163e-07	1.80429e-07	DHX9/DTX3L/EIF4G1/PARP9/HNRNPL/PLK1/ADNP/PYGO2/AURKA/ABL1/SNAPIN/TRIM21/PARP1/NUCKS1/MAPRE1/ATP2A2/HMGB1/PPP2CA/SUMO3/RALB/RAN/EIF4A3/IFI16/CALM3/CTNNB1/APP/ADAM15/CALM2/HMGB2/PTPRF/B2M/AURKB/SUMO1/E2F1/PEX19/CDC42/STMN1/TRIM28/HSP90AB1/ACTB/DAZAP2/KDM1A/ITGA2/MET/TMBIM6/IFIT1/CALM1/CTSZ/ZMPSTE24/POLDIP2/PPP1CA/JUN/CAV1/ANXA2/FKBP1A/FLOT1/NFKBIA/TGFB1/RPL11/CPNE1/ID1	61
BP	GO:0006260	DNA replication	51/1406	286/18903	4.19607e-09	2.68176e-07	1.94197e-07	DHX9/MCM6/SUPT16H/DDX23/TOP1/CHTF8/RRM1/SMC3/RPA1/MCM2/TIMELESS/CCNA2/MCM4/SSRP1/ACTL6A/POLE3/CIZ1/DDX21/SET/FEN1/RBBP7/PARP1/NUCKS1/SAMHD1/SMARCA5/MCM3/PCNA/PPP2CA/RBBP4/CDK1/RFC2/TNFAIP1/NASP/MCM7/RFC4/CDK2/RPA2/MCM5/RNASEH2A/RRM2/POLD2/STOML2/ALYREF/CDK2AP1/RMI2/TP53/HMGA1/PPP2R1A/ZMPSTE24/EGFR/PTMS	51
BP	GO:0051236	establishment of RNA localization	36/1406	166/18903	4.27913e-09	2.70479e-07	1.95865e-07	XPO1/DHX9/NUP205/NUP153/CKAP5/KPNB1/NUP62/SMG5/HNRNPA2B1/KHDRBS1/POLDIP3/G3BP2/NSUN2/KHSRP/SRSF1/TPR/XPOT/ALKBH5/SRSF3/SRSF7/RAN/IGF2BP2/EIF4A3/CASC3/NUP210/RBM8A/TOMM20/ALYREF/MAGOH/ZFP36L1/MYO1C/NPM1/SLBP/HNRNPA1/TST/FLOT1	36
BP	GO:0046822	regulation of nucleocytoplasmic transport	28/1406	109/18903	4.34814e-09	2.71853e-07	1.9686e-07	XPO1/DHX9/ECT2/NUP153/IPO5/KHDRBS1/NSUN2/TPR/PTPN11/CDK1/RAN/NOLC1/ANP32B/PPP1CC/HSP90AA1/UHMK1/SUMO1/YWHAE/RANGAP1/TRIM28/HSP90AB1/FERMT1/BAG3/IFI27/FLNA/CDH1/TGFB1/JUP	28
BP	GO:2001020	regulation of response to DNA damage stimulus	54/1406	312/18903	4.41383e-09	2.72993e-07	1.97686e-07	BAZ1B/DHX9/USP1/HNRNPK/DTX3L/DEK/ACTR2/PRKDC/FOXM1/PARP9/UBQLN4/TIMELESS/ACTL6A/ARID1A/ABL1/PSMD10/SF3B3/PARP1/COPS3/HMGB1/SMARCA5/PMAIP1/PCNA/FUS/SMARCC1/MCL1/RPA2/MORF4L1/USP22/TAF7/MORF4L2/MAGEF1/TRIM28/DDX5/ACTB/RMI2/TP53/KDM1A/SMARCB1/SOX4/ZMPSTE24/NPM1/CD74/EGFR/PTTG1IP/CD44/TPT1/MYC/SNAI2/BCL2L1/IER3/PPP4C/ZNF385A/RPL26	54
BP	GO:0043254	regulation of protein-containing complex assembly	65/1406	410/18903	4.77996e-09	2.92493e-07	2.11806e-07	HCFC1/CKAP5/EIF4G1/DCTN1/MTPN/HAX1/CAPZA1/HSPA8/DDX3X/ABL1/VCP/GRB2/PTPN11/SPTAN1/ARF6/PARP1/HSPA5/MAPRE1/HMGB1/RALB/FLII/CDKN1B/SPTBN1/HSP90AA1/RHOA/SUMO1/LCP1/ARPC1A/MYD88/NCK2/TWF1/GIT1/MSN/CDC42/STMN1/PFN2/DRG1/TP53/RIOK3/TFRC/BAK1/CDC42EP4/FERMT1/FKBP4/MET/RAC1/DBN1/CDC42EP5/RAF1/SOX9/ARPC2/CCR7/SSH3/FSCN1/RPL13A/ARPC1B/PMEPA1/RHOC/CAPZB/PFN1/TGFB1/CDC42EP1/COTL1/CXCL13/BRK1	65
BP	GO:0061013	regulation of mRNA catabolic process	39/1406	190/18903	5.13486e-09	3.10902e-07	2.25137e-07	THRAP3/DHX9/HNRNPU/PATL1/LARP1/SERBP1/CNOT1/HNRNPM/HNRNPC/SAMD4B/PAIP1/YTHDF2/SYNCRIP/KHSRP/CSDE1/ALKBH5/YTHDF1/PUM2/IGF2BP2/EIF4A3/FUS/MAPKAPK2/CASC3/HNRNPD/HNRNPAB/RBM8A/E2F1/MYD88/MAGOH/CARHSP1/POLR2G/APEX1/ZFP36L1/YBX3/PKP3/TNKS1BP1/NPM1/ZFP36L2/PKP1	39
BP	GO:0006997	nucleus organization	32/1406	139/18903	6.62355e-09	3.96861e-07	2.87384e-07	NUP205/NUP153/SF1/DCTN1/SERBP1/PLK1/SRPK1/PYGO2/LMNB1/TPR/LMNB2/PITPNB/CHMP5/SMARCA5/CDK1/NOLC1/HMGB2/CHMP1B/SUMO1/PLEC/GOLM1/CTDNEP1/CHMP2B/TMEM43/CHMP1A/RCC1/SUN2/RTN4/ZMPSTE24/RPS19/LMNA/CHMP2A	32
BP	GO:0019886	antigen processing and presentation of exogenous peptide antigen via MHC class II	14/1406	30/18903	6.96385e-09	4.12949e-07	2.99034e-07	B2M/CTSS/HLA-DRA/HLA-DPA1/CD74/HLA-DQA1/HLA-DQA2/HLA-DMA/HLA-DRB1/HLA-DPB1/CTSL/FCER1G/CTSE/HLA-DQB1	14
BP	GO:0033157	regulation of intracellular protein transport	43/1406	225/18903	8.3028e-09	4.87324e-07	3.52891e-07	XPO1/ECT2/HUWE1/NMT1/IPO5/HAX1/PTPN1/TPR/PTPN11/LMAN1/SAE1/CDK1/UBE2D3/RAN/NOLC1/ANP32B/SREBF2/HSP90AA1/UHMK1/SUMO1/LCP1/YWHAE/GDI1/RANGAP1/TRIM28/TM9SF4/HSP90AB1/TMEM30A/FERMT1/MYO1C/PRNP/BAG3/OS9/PDCD5/RAC2/STOM/IFI27/UBL5/FLNA/CDH1/TGFB1/JUP/CIB1	43
BP	GO:0032984	protein-containing complex disassembly	45/1406	242/18903	9.08056e-09	5.23493e-07	3.79083e-07	CKAP5/SUPT16H/UBQLN1/UBQLN4/MTPN/SSRP1/CKAP2/TPX2/ARID1A/ETF1/LAMP2/KIF2C/SET/CAPZA1/HSPA8/VCP/SNAPIN/SPTAN1/CHMP5/ATP2A2/FLII/SMARCC1/SPTBN1/CHMP1B/KIF5B/ABCE1/PPP1R9B/GSPT1/TWF1/STMN1/LIMA1/CHMP2B/HMGA1/CHMP1A/SMARCB1/CALM1/ZMPSTE24/WDR1/PPP1CA/EIF5A/MYC/CFL1/CAPZB/CIB1/CHMP2A	45
BP	GO:0032506	cytokinetic process	16/1406	40/18903	9.14013e-09	5.23493e-07	3.79083e-07	ECT2/RACGAP1/NUP62/ANLN/CEP55/KIF20A/CHMP5/CHMP1B/RHOA/AURKB/MYH9/PLEC/ARF1/CHMP2B/CHMP1A/CHMP2A	16
BP	GO:0035966	response to topologically incorrect protein	35/1406	163/18903	9.19208e-09	5.23493e-07	3.79083e-07	DAXX/MFN2/DNAJA1/HSPA8/PTPN1/VCP/UBXN4/HSPA5/BAG6/ATF6B/HSP90AA1/TMED2/HSPA4/NFE2L2/OPTN/HSPH1/NCK2/HSPA9/CREB3/HSPD1/HSP90AB1/TM7SF3/BAK1/STT3B/DNAJB1/TMBIM6/BAG3/OS9/RNF5/HSPB1/SERPINH1/THBS1/ERMP1/TRAM1/HSPB8	35
BP	GO:1904951	positive regulation of establishment of protein localization	53/1406	310/18903	9.47187e-09	5.34139e-07	3.86792e-07	ECT2/HUWE1/NMT1/IPO5/ATP2C1/TPR/ARF6/DKC1/GOLPH3/SAE1/CCT5/CCT3/OXCT1/CDK1/UBE2D3/RAN/TMED10/TCP1/ANP32B/SREBF2/HSP90AA1/CCT6A/CCT8/CCT4/YWHAE/HIF1A/CCT7/TRIM28/TM9SF4/HSP90AB1/TMEM30A/TM7SF3/LRRC8A/ADAM9/MYO1C/PRNP/BAG3/SOX4/PDCD5/RAC2/STOM/PPIA/GLUL/UBL5/KCNN4/FLNA/ANO1/CDH1/HLA-DRB1/TGFB1/JUP/EZR/CIB1	53
BP	GO:0051656	establishment of organelle localization	67/1406	437/18903	1.10091e-08	6.14799e-07	4.45201e-07	XPO1/HNRNPU/KPNB1/NUP62/DCTN1/PLK1/KIFC1/CDCA8/LMNB1/KIF2C/NUSAP1/LMNB2/CDCA5/SNAPIN/DYNC1H1/CHMP5/MAPRE1/ITGB1/PICALM/YKT6/RAN/RAB7A/TMED10/CCNB1/FAM83D/CTNNB1/TFG/MYO1B/RAB1A/BIRC5/SDCBP/CHMP1B/LAMP1/MYO1D/KIF5B/TMED2/AURKB/ABCE1/KIF1C/MYH9/ACTN4/RAB6A/HIF1A/PEF1/CDC42/COPG1/RPS15/CDH3/CHMP2B/CHMP1A/MYO1C/SEC16A/SUN2/KIF22/NPM1/YWHAZ/RAC2/TRAPPC6A/CFL1/EIF6/UCHL1/SLC9A3R1/GJA1/LMNA/TMED9/EZR/CH…	67
BP	GO:0034655	nucleobase-containing compound catabolic process	66/1406	428/18903	1.12421e-08	6.21772e-07	4.50251e-07	THRAP3/DHX9/HNRNPU/XRN2/PPP1R8/PATL1/SMG5/LARP1/SERBP1/CNOT1/HNRNPM/HNRNPC/SAMD4B/PAIP1/YTHDF2/NSUN2/ETF1/SYNCRIP/KHSRP/VCP/CSDE1/CNP/ALKBH5/YTHDF1/FEN1/OAS2/WDR82/DKC1/SAMHD1/PUM2/SND1/IGF2BP2/EIF4A3/FUS/MAPKAPK2/UNG/CASC3/HNRNPD/HNRNPAB/RNASEH2A/RBM8A/E2F1/MYD88/GSPT1/DDX5/MAGOH/HPRT1/CARHSP1/POLR2G/LSM2/TYMP/APEX1/AHCY/ZFP36L1/DCTPP1/NT5E/YBX3/DNASE2/PKP3/TNKS1BP1/NPM1/ZFP36L2/HINT1/CDA/LSM7/P…	66
BP	GO:0045069	regulation of viral genome replication	24/1406	87/18903	1.20572e-08	6.60504e-07	4.78299e-07	ADAR/OAS3/LARP1/SRPK1/TOP2A/DDB1/DDX3X/STAU1/PLSCR1/IFIH1/OAS2/RAD23A/IFI16/MX1/ILF3/TRIM28/TNIP1/OAS1/IFIT1/IFITM1/IFITM3/PPIA/BST2/TOP2B	24
BP	GO:2000278	regulation of DNA biosynthetic process	29/1406	121/18903	1.278e-08	6.89456e-07	4.99264e-07	HNRNPU/USP1/TFDP1/CHTF8/SMG5/HNRNPA2B1/HNRNPC/TINF2/DKC1/PTGES3/PCNA/CCT5/CCT3/RFC2/CTNNB1/TCP1/RFC4/XRCC5/HNRNPD/HSP90AA1/CCT6A/AURKB/CCT8/CCT4/CCT7/HSP90AB1/TP53/HNRNPA1/MYC	29
BP	GO:0051607	defense response to virus	52/1406	304/18903	1.28254e-08	6.89456e-07	4.99264e-07	ADAR/DHX9/DTX3L/OAS3/PARP9/TRIM26/STAT1/DDX21/PLSCR1/IFIH1/TRIM21/OAS2/SAMHD1/RNF26/LSM14A/PUM2/STAT2/DDX60/PMAIP1/DDX1/GBP1/IFI16/TRIM22/MX1/IRF1/HSP90AA1/ILF3/PCBP2/MYD88/IFIT3/TRIM28/RIOK3/DDX17/TNFAIP3/IFNGR2/IRF7/CXCL9/IFI6/OAS1/AIM2/IFIT1/CXCL10/SERINC3/ZMPSTE24/IFITM1/PHB2/IFITM3/IFI27/BST2/C1QBP/BCL2L1/MMP12	52
BP	GO:0010833	telomere maintenance via telomere lengthening	23/1406	81/18903	1.32457e-08	6.98985e-07	5.06164e-07	HNRNPU/SMG5/RPA1/HNRNPA2B1/HNRNPC/TINF2/PARP1/DKC1/PTGES3/CCT5/CCT3/CTNNB1/TCP1/XRCC5/HSP90AA1/CCT6A/AURKB/CCT8/CCT4/CCT7/HSP90AB1/TNKS1BP1/HNRNPA1	23
BP	GO:0072332	intrinsic apoptotic signaling pathway by p53 class mediator	23/1406	81/18903	1.32457e-08	6.98985e-07	5.06164e-07	HNRNPK/SNW1/MSH2/PMAIP1/IFI16/BAG6/E2F1/TMEM109/DDX5/TP53/KDM1A/TP63/CD74/PERP/PTTG1IP/CD44/EIF5A/HINT1/MYC/PHLDA3/RPL11/ZNF385A/RPL26	23
BP	GO:0140546	defense response to symbiont	52/1406	305/18903	1.4369e-08	7.47362e-07	5.41196e-07	ADAR/DHX9/DTX3L/OAS3/PARP9/TRIM26/STAT1/DDX21/PLSCR1/IFIH1/TRIM21/OAS2/SAMHD1/RNF26/LSM14A/PUM2/STAT2/DDX60/PMAIP1/DDX1/GBP1/IFI16/TRIM22/MX1/IRF1/HSP90AA1/ILF3/PCBP2/MYD88/IFIT3/TRIM28/RIOK3/DDX17/TNFAIP3/IFNGR2/IRF7/CXCL9/IFI6/OAS1/AIM2/IFIT1/CXCL10/SERINC3/ZMPSTE24/IFITM1/PHB2/IFITM3/IFI27/BST2/C1QBP/BCL2L1/MMP12	52
BP	GO:0007004	telomere maintenance via telomerase	21/1406	69/18903	1.45396e-08	7.47362e-07	5.41196e-07	HNRNPU/SMG5/RPA1/HNRNPC/TINF2/DKC1/PTGES3/CCT5/CCT3/CTNNB1/TCP1/XRCC5/HSP90AA1/CCT6A/AURKB/CCT8/CCT4/CCT7/HSP90AB1/TNKS1BP1/HNRNPA1	21
BP	GO:0046700	heterocycle catabolic process	70/1406	468/18903	1.45523e-08	7.47362e-07	5.41196e-07	THRAP3/DHX9/HNRNPU/XRN2/PPP1R8/PATL1/SMG5/LARP1/SERBP1/CNOT1/HNRNPM/HNRNPC/SAMD4B/PAIP1/YTHDF2/NSUN2/ETF1/SYNCRIP/KHSRP/VCP/CSDE1/CNP/ALKBH5/YTHDF1/FEN1/OAS2/WDR82/DKC1/SAMHD1/PUM2/SND1/IGF2BP2/EIF4A3/FUS/MAPKAPK2/UNG/CASC3/HNRNPD/HNRNPAB/RNASEH2A/RBM8A/E2F1/NFE2L2/MYD88/GSPT1/DDX5/MAGOH/HPRT1/CARHSP1/POLR2G/LSM2/TYMP/APEX1/AHCY/ZFP36L1/DCTPP1/NT5E/YBX3/DNASE2/PKP3/BLVRA/TNKS1BP1/NPM1/ABCC1/ZFP36…	70
BP	GO:0052547	regulation of peptidase activity	69/1406	459/18903	1.5026e-08	7.64862e-07	5.53869e-07	PAK2/PSME3/STAT3/USP14/UBE2Z/DDX3X/CSNK2A1/VCP/INTS1/HMGB1/APH1A/PMAIP1/PICALM/TMED10/IFI16/APP/ANP32B/HDAC1/NCSTN/BIRC5/MTCH1/RHOA/TNFSF10/PSMA3/PTTG1/PSMB8/HSPD1/PSMB9/BAK1/ARL6IP1/TP63/PRDX3/PSME1/PRNP/IFI6/AIM2/RAF1/MAGEA3/PDCD5/PERP/CAST/SERPING1/F3/FN1/PSME2/CD44/SPINK1/SERPINB1/DHCR24/FURIN/SOX2/BST2/ADRM1/MYC/CTSH/CAV1/GPI/APLP2/ANXA2/COL7A1/SERPINH1/SERPINB5/THBS1/GRN/LAPTM5/CTSB/EFNA1/G…	69
BP	GO:0002483	antigen processing and presentation of endogenous peptide antigen	11/1406	19/18903	1.60531e-08	8.09976e-07	5.86537e-07	TAP1/TAP2/B2M/TAPBP/HLA-E/HLA-C/HLA-B/HLA-A/HLA-F/HLA-DRA/HLA-DRB1	11
BP	GO:0048025	negative regulation of mRNA splicing, via spliceosome	12/1406	23/18903	1.71084e-08	8.49664e-07	6.15277e-07	HNRNPK/PTBP1/HNRNPA2B1/HNRNPL/RBMX/SRSF7/U2AF2/SRSF4/SRSF9/NPM1/C1QBP/SRSF6	12
BP	GO:0000245	spliceosomal complex assembly	25/1406	95/18903	1.71351e-08	8.49664e-07	6.15277e-07	SNRNP200/DDX23/SF1/USP39/SF3A1/SRPK1/SF3B2/RBMX/SF3A3/SRSF1/PSIP1/HTATSF1/SF3B3/DDX1/PHF5A/PRPF19/SF3B4/SF3B1/SRSF9/SNRPC/PUF60/PRPF6/SNRPB/SNRPD3/SRSF6	25
BP	GO:0042060	wound healing	67/1406	442/18903	1.74293e-08	8.56868e-07	6.20494e-07	GNA13/PLSCR1/ADIPOR2/LMAN1/CHMP5/ITGB1/RAP2B/TLN1/GNA12/CHMP1B/RHOA/NFE2L2/MYH9/HIF1A/ANXA5/PLEC/B4GALT1/DSP/ACTB/AK3/ACTG1/CDH3/ARL8B/MYL12A/ITGA2/FZD6/FERMT1/CHMP2B/TNFAIP3/PTK7/CHMP1A/AHNAK/RAF1/AXL/CLIC1/CADM4/DAG1/DDR1/ST3GAL4/HSPB1/SERPING1/F3/FN1/ITGB6/CD44/CLDN1/PPIA/PLAU/FLNA/MYOF/CAV1/RHOC/ANXA2/CD59/KRT6A/CNN2/MMP12/SRSF6/THBS1/EVPL/TGFB1/ANXA1/THBD/FCER1G/CD9/FKBP10/CHMP2A	67
BP	GO:0007015	actin filament organization	68/1406	454/18903	2.21477e-08	1.07961e-06	7.81787e-07	PAK2/TPM3/DIAPH1/ACTR2/ACTR3/MTPN/HAX1/CAPZA1/ABL1/GRB2/SPTAN1/ARF6/WASF2/TNFAIP1/FLII/CTNNA1/CD47/HSP90B1/MYO1B/CORO1C/SPTBN1/MYO1D/RHOA/PPP1R9B/LCP1/ARPC1A/NCK2/TWF1/CDC42/PLEC/STMN1/PFN2/LIMA1/ACTG1/ARF1/CDC42EP4/ACTN1/MET/MYO1C/RAC1/DBN1/CDC42EP5/TPM4/WDR1/ZYX/ARPC2/CCR7/MARCKSL1/PLS3/SSH3/RAC2/FSCN1/ITGB5/ARPC1B/RHOG/FLNA/MARCKS/RHOC/CFL1/CAPZB/PFN1/RHOD/CDC42EP1/DPYSL3/COTL1/ID1/BRK1/EZR	68
BP	GO:0044270	cellular nitrogen compound catabolic process	70/1406	474/18903	2.45859e-08	1.18839e-06	8.60562e-07	THRAP3/DHX9/HNRNPU/XRN2/PPP1R8/PATL1/SMG5/LARP1/SERBP1/CNOT1/HNRNPM/HNRNPC/SAMD4B/PAIP1/YTHDF2/NSUN2/ETF1/SYNCRIP/KHSRP/VCP/CSDE1/CNP/ALKBH5/YTHDF1/FEN1/OAS2/WDR82/DKC1/SAMHD1/PUM2/SND1/IGF2BP2/EIF4A3/FUS/MAPKAPK2/UNG/CASC3/HNRNPD/HNRNPAB/RNASEH2A/RBM8A/E2F1/MYD88/GSPT1/DDX5/MAGOH/HPRT1/CARHSP1/POLR2G/LSM2/TYMP/APEX1/AHCY/ZFP36L1/DCTPP1/NT5E/YBX3/DNASE2/PKP3/BLVRA/TNKS1BP1/NPM1/ABCC1/ZFP36L2/HINT…	70
BP	GO:0000723	telomere maintenance	33/1406	154/18903	2.55217e-08	1.22334e-06	8.85872e-07	HNRNPU/PRKDC/SMG5/RPA1/HNRNPA2B1/HNRNPC/ACTL6A/TINF2/FEN1/PARP1/DKC1/PTGES3/PCNA/CCT5/CCT3/CTNNB1/TCP1/XRCC6/XRCC5/RPA2/HNRNPD/HSP90AA1/CCT6A/AURKB/CCT8/CCT4/USP7/CCT7/HSP90AB1/APEX1/TNKS1BP1/HNRNPA1/MYC	33
BP	GO:0052548	regulation of endopeptidase activity	65/1406	428/18903	2.64634e-08	1.258e-06	9.10967e-07	PAK2/PSME3/STAT3/USP14/UBE2Z/DDX3X/CSNK2A1/VCP/INTS1/HMGB1/APH1A/PMAIP1/PICALM/TMED10/IFI16/APP/ANP32B/HDAC1/NCSTN/BIRC5/MTCH1/RHOA/TNFSF10/PSMA3/PTTG1/PSMB8/HSPD1/PSMB9/BAK1/ARL6IP1/TP63/PRDX3/PSME1/PRNP/IFI6/AIM2/RAF1/MAGEA3/PDCD5/PERP/CAST/SERPING1/F3/PSME2/CD44/SPINK1/SERPINB1/DHCR24/FURIN/SOX2/BST2/ADRM1/MYC/CTSH/GPI/APLP2/ANXA2/COL7A1/SERPINH1/SERPINB5/THBS1/LAPTM5/EFNA1/GAPDH/CST3	65
BP	GO:0071346	cellular response to interferon-gamma	28/1406	118/18903	2.86141e-08	1.34908e-06	9.76927e-07	ACTR2/PARP9/PARP14/ACTR3/STAT1/SYNCRIP/JAK1/VAMP3/GBP1/CD47/IRF1/GBP4/KIF5B/CDC42/FLNB/ACTG1/TP53/CDC42EP4/IFNGR2/MYO1C/IFNGR1/HLA-DPA1/ZYX/GBP2/CLDN1/RPL13A/CCL20/GAPDH	28
BP	GO:0043516	regulation of DNA damage response, signal transduction by p53 class mediator	15/1406	38/18903	3.30149e-08	1.54392e-06	1.11802e-06	PSMD10/COPS3/PMAIP1/DDX5/TP53/KDM1A/SOX4/ZMPSTE24/NPM1/CD74/PTTG1IP/CD44/SNAI2/ZNF385A/RPL26	15
BP	GO:1901796	regulation of signal transduction by p53 class mediator	26/1406	105/18903	3.49572e-08	1.62157e-06	1.17424e-06	HNRNPK/PRMT5/AURKA/PSMD10/COPS3/PMAIP1/AURKB/USP7/RPS15/DDX5/TP53/KDM1A/RPS20/SOX4/ZMPSTE24/NPM1/CD74/PTTG1IP/CD44/EIF5A/MYC/SNAI2/RPL37/RPL11/ZNF385A/RPL26	26
BP	GO:1904851	positive regulation of establishment of protein localization to telomere	8/1406	10/18903	3.61214e-08	1.66216e-06	1.20364e-06	DKC1/CCT5/CCT3/TCP1/CCT6A/CCT8/CCT4/CCT7	8
BP	GO:0071103	DNA conformation change	26/1406	106/18903	4.3078e-08	1.9523e-06	1.41374e-06	DHX9/MCM6/TOP1/CHTF8/CHD4/RPA1/HNRNPA2B1/MCM2/MCM4/TOP2A/DDX3X/ABL1/HMGB1/MCM3/DDX1/RFC2/MCM7/RFC4/XRCC6/XRCC5/MCM5/HMGB2/HMGA1/HMGB3/ANXA1/TOP2B	26
BP	GO:0007229	integrin-mediated signaling pathway	27/1406	113/18903	4.31055e-08	1.9523e-06	1.41374e-06	ABL1/PTPRA/PTPN11/RCC2/ITGB1/CTNNA1/CD47/LAMC1/TLN1/ADAM15/MYH9/ITGAV/CDC42/ITGA6/ITGA2/FERMT1/LAMA3/ADAM9/ITGB4/ITGA3/ZYX/LAMB1/FN1/ITGB6/CD63/ITGB5/FLNA	27
BP	GO:0007160	cell-matrix adhesion	43/1406	238/18903	4.61147e-08	2.07228e-06	1.50062e-06	PIP5K1A/ABL1/PTPRA/MAP4K4/RCC2/ITGB1/CTNNB1/TLN1/ADAM15/CORO1C/RIN2/RHOA/ITGAV/CDKN2A/ACTG1/ITGA6/ITGA2/FERMT1/ACTN1/ADAM9/COL17A1/RAC1/JAG1/ITGB4/DAG1/ITGA3/POLDIP2/DDR1/ZYX/CCR7/FN1/ITGB6/CD44/MSLN/CD63/ITGB5/MMP14/PLAU/MMP12/THBS1/RHOD/JUP/CIB1	43
BP	GO:0031330	negative regulation of cellular catabolic process	44/1406	247/18903	4.96004e-08	2.21164e-06	1.60154e-06	THRAP3/DHX9/HNRNPU/EIF4G1/STAT3/LARP1/UBQLN4/USP14/HNRNPC/PAIP1/EIF4G2/NSUN2/SYNCRIP/CSNK2A1/CSDE1/DKC1/IGF2BP2/FUS/MAPKAPK2/SMARCC1/MCL1/BAG6/HNRNPD/SDCBP/RRAGA/HNRNPAB/E2F1/MYD88/USP7/HSP90AB1/TP53/SLC7A5/MET/YBX3/PKP3/MAGEA3/POLDIP2/TSPO/RNF5/FURIN/ANXA2/PKP1/RPL11/CST3	44
BP	GO:0002495	antigen processing and presentation of peptide antigen via MHC class II	14/1406	34/18903	5.02042e-08	2.22134e-06	1.60857e-06	B2M/CTSS/HLA-DRA/HLA-DPA1/CD74/HLA-DQA1/HLA-DQA2/HLA-DMA/HLA-DRB1/HLA-DPB1/CTSL/FCER1G/CTSE/HLA-DQB1	14
BP	GO:0071897	DNA biosynthetic process	38/1406	198/18903	5.37414e-08	2.3597e-06	1.70876e-06	HNRNPU/USP1/TFDP1/CHTF8/SMG5/RRM1/RPA1/HNRNPA2B1/HNRNPC/POLE3/TINF2/VCP/DKC1/PTGES3/PCNA/CCT5/CCT3/RFC2/TYMS/CTNNB1/TCP1/RFC4/XRCC5/HNRNPD/HSP90AA1/CCT6A/AURKB/POLD2/CCT8/CCT4/CCT7/HSP90AB1/TP53/TK1/TNKS1BP1/POLDIP2/HNRNPA1/MYC	38
BP	GO:0007265	Ras protein signal transduction	56/1406	353/18903	5.42263e-08	2.36295e-06	1.71111e-06	RACGAP1/DNMT1/KPNB1/NUP62/NRAS/FOXM1/CCNA2/G3BP2/MFN2/GNB1/ABL1/GNA13/GRB2/ARF6/MAP4K4/CDC42SE1/ITGB1/RALA/WASF2/RALB/TNFAIP1/RAP2B/LRRC59/CDK2/GNA12/SDCBP/RHOA/CDKN2A/GIT1/GDI1/CDC42/STMN1/TRIM28/TP53/CDC42EP4/MET/ARHGDIA/RAC1/CDC42EP5/RAF1/CADM4/ITGA3/NET1/PLK2/RAC2/CRKL/DHCR24/RHOG/JUN/CFL1/FLOT1/FBP1/SQSTM1/RHOD/CDC42EP1/BRK1	56
BP	GO:2000573	positive regulation of DNA biosynthetic process	21/1406	74/18903	5.69171e-08	2.45455e-06	1.77744e-06	USP1/CHTF8/DKC1/PTGES3/PCNA/CCT5/CCT3/RFC2/CTNNB1/TCP1/RFC4/XRCC5/HSP90AA1/CCT6A/AURKB/CCT8/CCT4/CCT7/HSP90AB1/HNRNPA1/MYC	21
BP	GO:0050686	negative regulation of mRNA processing	12/1406	25/18903	5.71819e-08	2.45455e-06	1.77744e-06	HNRNPK/PTBP1/HNRNPA2B1/HNRNPL/RBMX/SRSF7/U2AF2/SRSF4/SRSF9/NPM1/C1QBP/SRSF6	12
BP	GO:0045088	regulation of innate immune response	43/1406	240/18903	5.91819e-08	2.52159e-06	1.82599e-06	ADAR/DHX9/PAK2/PRKDC/OAS3/PARP9/PARP14/YTHDF2/PTPN1/PTPN11/PLSCR1/SFPQ/TRIM21/PARP1/SAMHD1/LSM14A/NONO/HMGB1/STAT2/IFI16/XRCC6/XRCC5/IRF1/HMGB2/HSP90AA1/LAMP1/NFE2L2/TRAFD1/HLA-E/RIOK3/HLA-B/TNFAIP3/IRF7/HLA-A/HLA-F/OAS1/AIM2/IFI35/SERPING1/RPS19/MMP12/VSIG4/GRN	43
BP	GO:0006278	RNA-templated DNA biosynthetic process	21/1406	75/18903	7.35562e-08	3.11099e-06	2.2528e-06	HNRNPU/SMG5/RPA1/HNRNPC/TINF2/DKC1/PTGES3/CCT5/CCT3/CTNNB1/TCP1/XRCC5/HSP90AA1/CCT6A/AURKB/CCT8/CCT4/CCT7/HSP90AB1/TNKS1BP1/HNRNPA1	21
BP	GO:0002183	cytoplasmic translational initiation	15/1406	40/18903	7.44649e-08	3.12644e-06	2.26399e-06	EIF4G1/EIF4H/DENR/YTHDF2/EIF2S3/EIF3A/EIF5/EIF2S2/EIF3B/EIF3L/EIF4A2/EIF4B/EIF3I/SLBP/RPL13A	15
BP	GO:0044089	positive regulation of cellular component biogenesis	71/1406	498/18903	8.19799e-08	3.40755e-06	2.46755e-06	CKAP5/DNMT1/NUP62/ACTR2/EIF4G1/DCTN1/ACTR3/CNOT1/ADNP/G3BP2/ANLN/DDX3X/TPR/ABL1/VCP/GRB2/DYNC1H1/ARF6/AKIRIN1/MAP4K4/MAPRE1/RALA/WASF2/RALB/RAB7A/CDKN1B/PIP4K2C/CD47/CLSTN1/CDK2/HSP90AA1/SDCBP/RHOA/SUMO1/LCP1/MYD88/NCK2/GIT1/MSN/CDC42/PFN2/DRG1/TRIM28/TP53/TFRC/BAK1/CDC42EP4/FERMT1/MET/RAC1/CDC42EP5/DAG1/POLDIP2/SOX9/ARPC2/CCR7/RAC2/FSCN1/CLDN1/CAV1/RHOC/FLOT1/PFN1/PLEK2/TGFB1/CDC42EP1/DPYSL3/CXC…	71
BP	GO:0051099	positive regulation of binding	35/1406	177/18903	8.27421e-08	3.40755e-06	2.46755e-06	DHX9/DTX3L/EIF4G1/PARP9/HNRNPL/PYGO2/ABL1/TRIM21/PARP1/MAPRE1/HMGB1/PPP2CA/RALB/RAN/CALM3/CTNNB1/APP/CALM2/HMGB2/B2M/STMN1/TRIM28/HSP90AB1/DAZAP2/KDM1A/ITGA2/MET/CALM1/POLDIP2/CAV1/ANXA2/FKBP1A/FLOT1/TGFB1/RPL11	35
BP	GO:0032481	positive regulation of type I interferon production	19/1406	63/18903	8.29375e-08	3.40755e-06	2.46755e-06	DHX9/OAS3/STAT1/DDX3X/PTPN11/IFIH1/OAS2/IRAK1/IRF1/HMGB2/HSP90AA1/MYD88/HSPD1/RIOK3/IRF7/OAS1/FLOT1/MMP12/GAPDH	19
BP	GO:0019439	aromatic compound catabolic process	70/1406	489/18903	8.61841e-08	3.51582e-06	2.54595e-06	THRAP3/DHX9/HNRNPU/XRN2/PPP1R8/PATL1/SMG5/LARP1/SERBP1/CNOT1/HNRNPM/HNRNPC/SAMD4B/PAIP1/YTHDF2/NSUN2/ETF1/SYNCRIP/KHSRP/VCP/CSDE1/CNP/ALKBH5/YTHDF1/FEN1/OAS2/WDR82/DKC1/SAMHD1/PUM2/SND1/IGF2BP2/EIF4A3/FUS/MAPKAPK2/UNG/CASC3/HNRNPD/HNRNPAB/RNASEH2A/RBM8A/E2F1/MYD88/GSPT1/DDX5/MAGOH/HPRT1/CARHSP1/POLR2G/LSM2/TYMP/APEX1/AHCY/ZFP36L1/DCTPP1/NT5E/YBX3/DNASE2/PKP3/BLVRA/COMT/TNKS1BP1/NPM1/ABCC1/ZFP36L2…	70
BP	GO:0050000	chromosome localization	23/1406	89/18903	9.13501e-08	3.70032e-06	2.67956e-06	HNRNPU/KPNB1/NUP62/ACTR2/DLGAP5/ACTR3/KIFC1/CDCA8/KIF2C/CDCA5/DYNC1H1/CHMP5/MAPRE1/CCNB1/FAM83D/BIRC5/CHMP1B/AURKB/CHMP2B/CHMP1A/KIF22/LMNA/CHMP2A	23
BP	GO:0034976	response to endoplasmic reticulum stress	45/1406	261/18903	9.51206e-08	3.82611e-06	2.77065e-06	UBQLN1/EIF4G1/USP14/PDIA6/CANX/DDX3X/PTPN1/ABL1/VCP/UBXN4/HSPA5/UBQLN2/ATP2A2/HYOU1/PMAIP1/PDIA4/BAG6/HSP90B1/TXNDC12/ATF6B/TMED2/NFE2L2/CALR/CCDC47/NCK2/CREB3/TP53/BAK1/STT3B/PDIA3/TMBIM6/SEC16A/OS9/MAGEA3/SERINC3/GRINA/RNF5/JUN/CAV1/MARCKS/P4HB/BCL2L1/FLOT1/THBS1/ERMP1	45
BP	GO:0048144	fibroblast proliferation	25/1406	103/18903	9.73273e-08	3.88768e-06	2.81523e-06	DHX9/CCNA2/ABL1/CKS1B/PTGES3/CDK1/CCNB1/CTNNB1/MORF4L1/E2F1/S100A6/FOSL2/TP53/CDK4/ZMPSTE24/SOD2/CD74/EGFR/FN1/CKS2/MYC/JUN/CAV1/BRK1/FTH1	25
BP	GO:0019883	antigen processing and presentation of endogenous antigen	12/1406	26/18903	9.90001e-08	3.92478e-06	2.8421e-06	TAP1/TAP2/B2M/TAPBP/HLA-E/HLA-C/HLA-B/HLA-A/HLA-F/HLA-DRA/CD74/HLA-DRB1	12
BP	GO:0009895	negative regulation of catabolic process	53/1406	332/18903	9.96207e-08	3.92478e-06	2.8421e-06	THRAP3/DHX9/HNRNPU/EIF4G1/STAT3/LARP1/UBQLN4/USP14/HNRNPC/PAIP1/EIF4G2/NSUN2/SYNCRIP/CSNK2A1/CSDE1/SF3B3/DKC1/SNX12/IGF2BP2/FUS/MAPKAPK2/SMARCC1/MCL1/BAG6/HNRNPD/SDCBP/RRAGA/HNRNPAB/LAPTM4B/E2F1/MYD88/USP7/GIT1/HSP90AB1/TP53/AZIN1/SLC7A5/MET/YBX3/PKP3/MAGEA3/POLDIP2/TSPO/RNF5/SNX3/EGFR/FURIN/FLNA/ANXA2/PKP1/FBP1/RPL11/CST3	53
BP	GO:0034340	response to type I interferon	22/1406	83/18903	1.06243e-07	4.1572e-06	3.0104e-06	ADAR/OAS3/STAT1/YTHDF2/PTPN1/PTPN11/JAK1/OAS2/IRAK1/SAMHD1/LSM14A/STAT2/MX1/MYD88/IRF7/OAS1/IFIT1/SHMT2/IFITM1/IFITM3/IFI27/MMP12	22
BP	GO:0002831	regulation of response to biotic stimulus	56/1406	361/18903	1.17903e-07	4.5823e-06	3.31823e-06	ADAR/DHX9/DTX3L/PAK2/PRKDC/OAS3/PARP9/PARP14/STAT1/YTHDF2/PTPN1/PTPN11/PLSCR1/SFPQ/TRIM21/PARP1/SAMHD1/RNF26/LSM14A/NONO/PUM2/HMGB1/STAT2/DDX60/IFI16/XRCC6/XRCC5/IRF1/HMGB2/HSP90AA1/LAMP1/NFE2L2/OPTN/PCBP2/TRAFD1/HLA-E/HSPD1/RIOK3/HLA-B/TNFAIP3/IRF7/HLA-A/HLA-F/OAS1/AIM2/IFIT1/ZMPSTE24/IFI35/AHR/SERPING1/C1QBP/RPS19/MMP12/HLA-DRB1/VSIG4/GRN	56
BP	GO:0045824	negative regulation of innate immune response	21/1406	77/18903	1.21006e-07	4.65232e-06	3.36894e-06	ADAR/OAS3/PARP14/YTHDF2/TRIM21/PARP1/SAMHD1/STAT2/IFI16/TRAFD1/HLA-E/HLA-B/TNFAIP3/HLA-A/HLA-F/OAS1/SERPING1/RPS19/MMP12/VSIG4/GRN	21
BP	GO:0006605	protein targeting	52/1406	325/18903	1.21917e-07	4.65232e-06	3.36894e-06	HUWE1/M6PR/SRP72/HAX1/YWHAG/MFN2/LAMP2/YWHAQ/HSPA8/LMAN1/HSPA5/SEC61A1/SSR3/SAE1/UBE2D3/ICMT/RAB7A/UBL4A/BAG6/NCOA4/SREBF2/HSP90AA1/SDCBP/HSPA4/YWHAE/PEX19/SRP9/GDI1/SCARB2/TOMM20/MICALL1/HSPD1/YWHAB/ARL6IP1/MYO1C/PRNP/BAG3/OS9/SSR2/TIMM23/TOMM22/TSPO/PDCD5/YWHAZ/RAC2/STOM/UBL5/ROMO1/RPL11/LAPTM5/TRAM1/CIB1	52
BP	GO:0070203	regulation of establishment of protein localization to telomere	8/1406	11/18903	1.23749e-07	4.65232e-06	3.36894e-06	DKC1/CCT5/CCT3/TCP1/CCT6A/CCT8/CCT4/CCT7	8
BP	GO:1904869	regulation of protein localization to Cajal body	8/1406	11/18903	1.23749e-07	4.65232e-06	3.36894e-06	DKC1/CCT5/CCT3/TCP1/CCT6A/CCT8/CCT4/CCT7	8
BP	GO:1904871	positive regulation of protein localization to Cajal body	8/1406	11/18903	1.23749e-07	4.65232e-06	3.36894e-06	DKC1/CCT5/CCT3/TCP1/CCT6A/CCT8/CCT4/CCT7	8
BP	GO:0045785	positive regulation of cell adhesion	69/1406	484/18903	1.25091e-07	4.67225e-06	3.38337e-06	YES1/ACTL6A/ARID1A/ABL1/PTPN11/JAK1/IRAK1/MAP4K4/HMGB1/SMARCC1/CD47/LAMC1/SLC7A1/RIN2/ZBTB7B/B2M/RHOA/EFNB2/CALR/ITGAV/HSPH1/NCK2/CDC42/CD276/HLA-E/HSPD1/ACTB/TFRC/ITGA2/FERMT1/ADAM9/HLA-A/RAC1/SMARCB1/HLA-DRA/SOX4/DAG1/ITGA3/POLDIP2/ST3GAL4/HLA-DPA1/CD74/ARPC2/LAMB1/CCR7/FN1/MDK/CD44/CRKL/HLA-DQA1/SOX2/C1QBP/FLNA/CAV1/HLA-DQA2/P4HB/IGF2/HLA-DMA/FLOT1/HLA-DRB1/FBLN2/RHOD/HLA-DPB1/ANXA1/CXCL13/JUP…	69
BP	GO:0045862	positive regulation of proteolysis	57/1406	372/18903	1.39619e-07	5.1812e-06	3.75192e-06	UBQLN1/PSME3/STAT3/PLK1/AURKA/DDX3X/PSMD10/NUB1/VCP/PSMC2/UBQLN2/HMGB1/APH1A/PMAIP1/RNF19B/PICALM/RAD23A/IFI16/USP5/BAG6/APP/ANP32B/NCSTN/CDC20/MTCH1/RHOA/SUMO1/SUMO2/NFE2L2/MYH9/PSMC3/MAGEF1/TNFSF10/ENO1/HSPD1/TNIP1/BAK1/ADAM9/PSME1/AIM2/CTSC/PDCD5/PERP/F3/FN1/PSMC4/PSME2/FURIN/MMP14/ADRM1/MYC/CTSH/CAV1/ANXA2/GRN/LAPTM5/EFNA1	57
BP	GO:0015931	nucleobase-containing compound transport	40/1406	223/18903	1.64501e-07	6.06545e-06	4.39224e-06	XPO1/DHX9/NUP205/NUP153/CKAP5/KPNB1/NUP62/SMG5/HNRNPA2B1/KHDRBS1/POLDIP3/G3BP2/NSUN2/KHSRP/SRSF1/TPR/XPOT/ALKBH5/SRSF3/SRSF7/SLC25A5/RAN/IGF2BP2/EIF4A3/CD47/CASC3/NUP210/RBM8A/SLC35B2/TOMM20/ALYREF/MAGOH/LRRC8A/ZFP36L1/MYO1C/NPM1/SLBP/HNRNPA1/TST/FLOT1	40
BP	GO:0032388	positive regulation of intracellular transport	37/1406	199/18903	1.86277e-07	6.82462e-06	4.94199e-06	DHX9/ECT2/HUWE1/NMT1/IPO5/KHDRBS1/TPR/SNAPIN/DYNC1H1/SAE1/CDK1/UBE2D3/RAN/ANP32B/SREBF2/HSP90AA1/YWHAE/MSN/TRIM28/TM9SF4/HSP90AB1/TMEM30A/MYO1C/PRNP/BAG3/PDCD5/EHD2/RAC2/STOM/UBL5/FLNA/ANXA2/CDH1/TGFB1/JUP/EZR/CIB1	37
BP	GO:0031334	positive regulation of protein-containing complex assembly	36/1406	192/18903	2.18889e-07	7.96866e-06	5.77044e-06	CKAP5/EIF4G1/DCTN1/DDX3X/VCP/GRB2/ARF6/MAPRE1/CDKN1B/HSP90AA1/RHOA/SUMO1/LCP1/MYD88/NCK2/GIT1/MSN/PFN2/DRG1/TP53/TFRC/BAK1/CDC42EP4/FERMT1/MET/RAC1/CDC42EP5/ARPC2/CCR7/FSCN1/RHOC/PFN1/TGFB1/CDC42EP1/CXCL13/BRK1	36
BP	GO:2000767	positive regulation of cytoplasmic translation	9/1406	15/18903	2.25454e-07	8.15604e-06	5.90613e-06	DHX9/HNRNPU/PAIP1/SYNCRIP/CSDE1/CNBP/HNRNPD/YBX3/PKM	9
BP	GO:1903320	regulation of protein modification by small protein conjugation or removal	43/1406	252/18903	2.45657e-07	8.83136e-06	6.39515e-06	DTX3L/HUWE1/UBQLN1/DAXX/PLK1/DNAJA1/DDX3X/ABL1/PSMD10/VCP/UBA2/TRIM21/HSPA5/COPS3/SAE1/U2AF2/CTNNB1/CDC20/HSP90AA1/HIF1A/IVNS1ABP/PEF1/RPS15/HSP90AB1/UBE2C/TNIP1/KDM1A/ARRDC3/TNFAIP3/RPS2/RPS20/SOX4/NPM1/TSPO/PTTG1IP/PPIA/CAV1/FKBP1A/EGR1/SQSTM1/RPL37/RPL11/LAPTM5	43
BP	GO:0030099	myeloid cell differentiation	60/1406	407/18903	2.60564e-07	9.1773e-06	6.64566e-06	ADAR/PRKDC/STAT3/STAT1/HAX1/PTPN11/KLF10/PTBP3/PARP1/EIF2AK1/SLC25A5/LBR/WASF2/GLO1/IFI16/SBNO2/CTNNB1/APP/HMGB2/B2M/MYH9/HIF1A/HSPA9/CDKN2B/CDC42/MAFB/TFRC/PAF1/ACTN1/IRF7/PRDX3/ZFP36L1/JAG1/DNASE2/TMEM14C/WDR1/DHRS2/BATF/CD74/CCR7/HMGB3/ITGB6/C1QC/CSF1R/MYC/FLNA/JUN/RPS14/RPS19/FASN/ANXA2/UBD/HLA-DRB1/TESC/EIF6/NFKBIA/TGFB1/ZNF385A/CIB1/RPS6	60
BP	GO:0051170	import into nucleus	33/1406	169/18903	2.6149e-07	9.1773e-06	6.64566e-06	ECT2/NUP153/KPNB1/NUP62/IPO5/TNPO3/STAT3/IPO7/KPNA2/TPR/CSE1L/CDK1/RAN/NOLC1/HSP90AA1/SUMO1/TRIM28/HSP90AB1/TP53/FERMT1/BAG3/PHB2/HNRNPA1/PTTG1IP/FLNA/CDH1/TXNIP/MMP12/SQSTM1/NFKBIA/TGFB1/JUP/LMNA	33
BP	GO:0042255	ribosome assembly	18/1406	61/18903	2.61661e-07	9.1773e-06	6.64566e-06	PRKDC/DDX3X/XRCC5/TRAF7/RPS28/SBDS/RPS15/ERAL1/RPL24/NPM1/RPL38/C1QBP/RPS14/RPS19/RPSA/RPL23A/EIF6/RPL11	18
BP	GO:1904356	regulation of telomere maintenance via telomere lengthening	18/1406	61/18903	2.61661e-07	9.1773e-06	6.64566e-06	HNRNPU/SMG5/HNRNPA2B1/HNRNPC/TINF2/PARP1/DKC1/CCT5/CCT3/CTNNB1/TCP1/XRCC5/CCT6A/AURKB/CCT8/CCT4/CCT7/HNRNPA1	18
BP	GO:0150115	cell-substrate junction organization	24/1406	101/18903	2.6741e-07	9.32209e-06	6.75051e-06	PIP5K1A/ABL1/PTPRA/ARF6/MAP4K4/RCC2/LAMC1/TLN1/CORO1C/RHOA/PLEC/ACTG1/ITGA6/ITGA2/ACTN1/LAMA3/COL17A1/RAC1/ITGB4/POLDIP2/FN1/MMP14/THBS1/RHOD	24
BP	GO:0034063	stress granule assembly	12/1406	28/18903	2.71051e-07	9.3921e-06	6.80121e-06	UBAP2L/G3BP2/YTHDF2/DDX3X/CSDE1/DYNC1H1/YTHDF1/LSM14A/ATXN2L/PUM2/PRRC2C/DAZAP2	12
BP	GO:0030330	DNA damage response, signal transduction by p53 class mediator	20/1406	74/18903	2.82961e-07	9.74606e-06	7.05753e-06	FOXM1/PSMD10/COPS3/PMAIP1/CDKN1B/DDX5/TP53/KDM1A/SOX4/ZMPSTE24/NPM1/BATF/CD74/PLK2/PTTG1IP/CD44/SNAI2/NDRG1/ZNF385A/RPL26	20
BP	GO:0002832	negative regulation of response to biotic stimulus	26/1406	116/18903	2.97572e-07	1.01883e-05	7.37777e-06	ADAR/OAS3/PARP14/YTHDF2/TRIM21/PARP1/SAMHD1/RNF26/STAT2/IFI16/PCBP2/TRAFD1/HLA-E/RIOK3/HLA-B/TNFAIP3/HLA-A/HLA-F/OAS1/AHR/SERPING1/C1QBP/RPS19/MMP12/VSIG4/GRN	26
BP	GO:0000380	alternative mRNA splicing, via spliceosome	21/1406	81/18903	3.09552e-07	1.05358e-05	7.62939e-06	THRAP3/DHX9/HNRNPU/PTBP1/KHDRBS1/HNRNPL/HNRNPM/RBMX/STRAP/SRSF1/SFPQ/SRSF2/SRSF9/RBM8A/DDX5/MAGOH/KDM1A/DDX17/PUF60/HNRNPA1/SRSF6	21
BP	GO:0021762	substantia nigra development	15/1406	44/18903	3.20381e-07	1.08402e-05	7.84982e-06	YWHAQ/CNP/HSPA5/CALM3/YWHAH/CALM2/RHOA/YWHAE/CDC42/ACTB/SEC16A/DYNLL1/CALM1/COX6B1/BASP1	15
BP	GO:0008630	intrinsic apoptotic signaling pathway in response to DNA damage	24/1406	102/18903	3.25309e-07	1.09426e-05	7.92397e-06	HNRNPK/SNW1/PRKDC/MSH2/ABL1/IFI16/MCL1/BAG6/E2F1/TMEM109/TP53/KDM1A/BAK1/TP63/SOD2/CD74/CD44/TPT1/SNAI2/BCL2L1/TNFRSF1A/PHLDA3/ZNF385A/RPL26	24
BP	GO:0007044	cell-substrate junction assembly	23/1406	95/18903	3.29484e-07	1.10186e-05	7.979e-06	PIP5K1A/ABL1/PTPRA/MAP4K4/RCC2/LAMC1/TLN1/CORO1C/RHOA/PLEC/ACTG1/ITGA6/ITGA2/ACTN1/LAMA3/COL17A1/RAC1/ITGB4/POLDIP2/FN1/MMP14/THBS1/RHOD	23
BP	GO:0070202	regulation of establishment of protein localization to chromosome	8/1406	12/18903	3.46893e-07	1.13371e-05	8.20967e-06	DKC1/CCT5/CCT3/TCP1/CCT6A/CCT8/CCT4/CCT7	8
BP	GO:1903405	protein localization to nuclear body	8/1406	12/18903	3.46893e-07	1.13371e-05	8.20967e-06	DKC1/CCT5/CCT3/TCP1/CCT6A/CCT8/CCT4/CCT7	8
BP	GO:1904816	positive regulation of protein localization to chromosome, telomeric region	8/1406	12/18903	3.46893e-07	1.13371e-05	8.20967e-06	DKC1/CCT5/CCT3/TCP1/CCT6A/CCT8/CCT4/CCT7	8
BP	GO:1904867	protein localization to Cajal body	8/1406	12/18903	3.46893e-07	1.13371e-05	8.20967e-06	DKC1/CCT5/CCT3/TCP1/CCT6A/CCT8/CCT4/CCT7	8
BP	GO:0051604	protein maturation	52/1406	336/18903	3.57033e-07	1.16026e-05	8.4019e-06	CIAO1/NAA50/YME1L1/SNAPIN/METAP2/PARP1/SNX12/APH1A/GALNT2/IFI16/ECE1/NCSTN/CAPN2/ATP6AP2/STOML2/CTSS/MYH9/CALR/PGK1/MAGEF1/MAFB/ENO1/HSPD1/LMF2/BAK1/PRNP/MAGEA3/SOX4/CTSZ/ZMPSTE24/PERP/PRDX4/CAST/CPE/F3/FN1/DHCR24/FURIN/MMP14/PLAU/FLNA/CTSH/ANXA2/SRGN/SERPINH1/FKBP1A/THBS1/TESC/C1R/CTSL/THBD/CTSE	52
BP	GO:2000765	regulation of cytoplasmic translation	12/1406	29/18903	4.31097e-07	1.39307e-05	1.00878e-05	DHX9/HNRNPU/PAIP1/YTHDF2/SYNCRIP/CSDE1/CNBP/HNRNPD/YBX3/RPL13A/PKM/ZNF385A	12
BP	GO:0043588	skin development	48/1406	302/18903	4.51621e-07	1.45051e-05	1.05038e-05	PIP5K1A/NSUN2/PTGES3/PUM2/CTNNB1/HDAC1/CLIC4/PLEC/MAFB/STMN1/FLNB/DSP/FOSL2/CDH3/ITGA6/ITGA2/FZD6/GJB3/FERMT1/ARRDC3/TRPC4AP/TP63/ZFP36L1/MET/ADAM9/JAG1/ITGB4/ITGA3/ZMPSTE24/SOX9/EGFR/KRT7/ITGB6/CLDN1/DHCR24/COL5A2/KRT6A/TXNIP/SRSF6/KRT5/EVPL/IRF6/ANXA1/ST14/ERRFI1/KRT8/JUP/KRT6C	48
BP	GO:0034446	substrate adhesion-dependent cell spreading	25/1406	111/18903	4.53915e-07	1.45051e-05	1.05038e-05	ABL1/RCC2/VAMP3/GBP1/LAMC1/RAB1A/CORO1C/RHOA/CALR/ITGAV/ACTN4/CDC42/RAC1/AXL/LAMB3/ARPC2/LAMB1/FN1/MDK/CRKL/C1QBP/FLNA/P4HB/EFNA1/CIB1	25
BP	GO:0006606	protein import into nucleus	32/1406	165/18903	4.63769e-07	1.47381e-05	1.06725e-05	ECT2/NUP153/KPNB1/NUP62/IPO5/TNPO3/STAT3/IPO7/KPNA2/TPR/CSE1L/CDK1/RAN/NOLC1/HSP90AA1/SUMO1/TRIM28/HSP90AB1/TP53/FERMT1/BAG3/PHB2/PTTG1IP/FLNA/CDH1/TXNIP/MMP12/SQSTM1/NFKBIA/TGFB1/JUP/LMNA	32
BP	GO:0007080	mitotic metaphase plate congression	17/1406	57/18903	4.73444e-07	1.49629e-05	1.08353e-05	HNRNPU/KPNB1/NUP62/KIFC1/CDCA8/KIF2C/CDCA5/CHMP5/MAPRE1/CCNB1/BIRC5/CHMP1B/AURKB/CHMP2B/CHMP1A/KIF22/CHMP2A	17
BP	GO:0002399	MHC class II protein complex assembly	9/1406	16/18903	4.81173e-07	1.50419e-05	1.08925e-05	B2M/HLA-DRA/HLA-DPA1/HLA-DQA1/HLA-DQA2/HLA-DMA/HLA-DRB1/HLA-DPB1/HLA-DQB1	9
BP	GO:0002503	peptide antigen assembly with MHC class II protein complex	9/1406	16/18903	4.81173e-07	1.50419e-05	1.08925e-05	B2M/HLA-DRA/HLA-DPA1/HLA-DQA1/HLA-DQA2/HLA-DMA/HLA-DRB1/HLA-DPB1/HLA-DQB1	9
BP	GO:1901987	regulation of cell cycle phase transition	64/1406	453/18903	4.93733e-07	1.53137e-05	1.10893e-05	PSME3/EIF4G1/DLGAP5/PRKDC/TFDP1/MSH2/RRM1/TIMELESS/RAD21/PLK1/CTDSP2/ACTL6A/ANLN/CDCA8/NSUN2/ARID1A/AURKA/DDB1/DDX3X/TPR/CDCA5/PTPN11/ZWINT/RCC2/PPP2CA/CDK1/CDKN1B/CCNB1/PRPF19/FAM83D/SMARCC1/CDK2/APP/RPA2/BIRC5/CDC20/CDC25B/AURKB/RRM2/PPP1R9B/E2F1/CDKN2A/CDKN2B/UBE2C/ACTB/TP53/PAF1/APEX1/ZFP36L1/PSME1/SMARCB1/CDK4/NPM1/PHB2/EGFR/PLK2/PSME2/ZFP36L2/ATF5/SOX2/TBX2/UBD/ANXA1/RPL26	64
BP	GO:0022604	regulation of cell morphogenesis	49/1406	312/18903	4.95192e-07	1.53137e-05	1.10893e-05	DIAPH1/ACTR2/PRKDC/CAPRIN1/ABL1/GNA13/RCC2/CDC42SE1/DVL3/GBP1/PLXNA1/GNA12/CORO1C/RHOA/MYH9/CALR/ACTN4/MSN/CDC42/MYL12A/CDC42EP4/RAC1/DBN1/CDC42EP5/DAG1/ZMPSTE24/WDR1/ARPC2/FN1/MDK/RAC2/CD44/CRKL/CSF1R/RHOG/C1QBP/FLNA/PLXNB2/RHOC/P4HB/CFL1/CAPZB/RHOD/MYL12B/ANXA1/CDC42EP1/SLC9A3R1/EZR/CIB1	49
BP	GO:0032970	regulation of actin filament-based process	59/1406	406/18903	5.34523e-07	1.64416e-05	1.1906e-05	ECT2/PAK2/MTPN/HAX1/IQGAP1/CAPZA1/ABL1/GRB2/SPTAN1/ARF6/ATP2A2/DSG2/WASF2/FLII/CD47/SPTBN1/RHOA/SUMO1/ARPC1A/MYH9/NCK2/TWF1/CDC42/STMN1/PFN2/SMIM22/LIMA1/DSP/ACTG1/ARF1/CDC42EP4/MET/ARHGDIA/RAC1/DBN1/CDC42EP5/WDR1/ARPC2/CCR7/MDK/SSH3/RAC2/FSCN1/CSF1R/BST2/ARPC1B/RHOG/FLNA/CAV1/RHOC/CNN2/CAPZB/PFN1/RHOD/CDC42EP1/COTL1/ID1/JUP/BRK1	59
BP	GO:0071357	cellular response to type I interferon	20/1406	77/18903	5.70278e-07	1.74481e-05	1.26349e-05	ADAR/OAS3/STAT1/YTHDF2/PTPN1/PTPN11/JAK1/OAS2/IRAK1/SAMHD1/LSM14A/STAT2/MYD88/IRF7/OAS1/IFIT1/IFITM1/IFITM3/IFI27/MMP12	20
BP	GO:0051310	metaphase plate congression	19/1406	71/18903	6.60621e-07	2.01053e-05	1.45591e-05	HNRNPU/KPNB1/NUP62/KIFC1/CDCA8/KIF2C/CDCA5/DYNC1H1/CHMP5/MAPRE1/CCNB1/FAM83D/BIRC5/CHMP1B/AURKB/CHMP2B/CHMP1A/KIF22/CHMP2A	19
BP	GO:0002474	antigen processing and presentation of peptide antigen via MHC class I	12/1406	30/18903	6.69904e-07	2.02805e-05	1.46859e-05	TAP1/TAP2/B2M/TAPBP/CALR/HLA-E/HLA-C/HLA-B/HLA-A/PDIA3/HLA-F/FCER1G	12
BP	GO:0006275	regulation of DNA replication	28/1406	136/18903	6.786e-07	2.04362e-05	1.47987e-05	DHX9/MCM6/CHTF8/SMC3/MCM2/TIMELESS/CCNA2/MCM4/ACTL6A/POLE3/CIZ1/NUCKS1/SMARCA5/MCM3/PCNA/PPP2CA/CDK1/RFC2/TNFAIP1/MCM7/RFC4/CDK2/MCM5/STOML2/TP53/PPP2R1A/ZMPSTE24/EGFR	28
BP	GO:2001252	positive regulation of chromosome organization	24/1406	106/18903	6.92059e-07	2.07329e-05	1.50136e-05	DNMT1/HNRNPA2B1/RAD21/ACTL6A/NCAPD2/TINF2/TPR/SFPQ/FEN1/DKC1/CCT5/CCT3/CTNNB1/TCP1/XRCC5/CDK2/HNRNPD/CCT6A/AURKB/CCT8/CCT4/CCT7/TRIM28/HNRNPA1	24
BP	GO:0032271	regulation of protein polymerization	36/1406	201/18903	6.98456e-07	2.08162e-05	1.50738e-05	CKAP5/DCTN1/MTPN/HAX1/CAPZA1/ABL1/GRB2/SPTAN1/ARF6/MAPRE1/FLII/CDKN1B/SPTBN1/HSP90AA1/RHOA/ARPC1A/NCK2/TWF1/GIT1/STMN1/PFN2/DRG1/CDC42EP4/FKBP4/MET/RAC1/DBN1/CDC42EP5/ARPC2/CCR7/SSH3/ARPC1B/CAPZB/PFN1/CDC42EP1/COTL1	36
BP	GO:0032392	DNA geometric change	23/1406	99/18903	7.24385e-07	2.14776e-05	1.55529e-05	DHX9/MCM6/CHTF8/CHD4/RPA1/HNRNPA2B1/MCM2/MCM4/TOP2A/DDX3X/HMGB1/MCM3/DDX1/RFC2/MCM7/RFC4/XRCC6/XRCC5/MCM5/HMGB2/HMGA1/HMGB3/ANXA1	23
BP	GO:1901990	regulation of mitotic cell cycle phase transition	53/1406	354/18903	7.94905e-07	2.34477e-05	1.69794e-05	PSME3/EIF4G1/DLGAP5/PRKDC/TFDP1/RRM1/RAD21/PLK1/CTDSP2/ACTL6A/ANLN/CDCA8/ARID1A/AURKA/DDB1/DDX3X/TPR/CDCA5/ZWINT/RCC2/PPP2CA/CDK1/CDKN1B/CCNB1/SMARCC1/CDK2/APP/RPA2/BIRC5/CDC20/CDC25B/AURKB/RRM2/PPP1R9B/E2F1/CDKN2A/CDKN2B/UBE2C/ACTB/TP53/APEX1/ZFP36L1/PSME1/SMARCB1/CDK4/PHB2/EGFR/PLK2/PSME2/ZFP36L2/UBD/ANXA1/RPL26	53
BP	GO:0070849	response to epidermal growth factor	15/1406	47/18903	8.46638e-07	2.48462e-05	1.79922e-05	IQGAP1/TPR/PTPN11/PTPN12/MCM7/NCL/PPP1R9B/ZFP36L1/SOX9/EGFR/ZFP36L2/SNAI2/ERRFI1/ID1/EEF1A1	15
BP	GO:0032210	regulation of telomere maintenance via telomerase	16/1406	53/18903	8.54989e-07	2.49639e-05	1.80774e-05	HNRNPU/SMG5/HNRNPC/TINF2/DKC1/CCT5/CCT3/CTNNB1/TCP1/XRCC5/CCT6A/AURKB/CCT8/CCT4/CCT7/HNRNPA1	16
BP	GO:0051028	mRNA transport	27/1406	130/18903	8.90906e-07	2.58786e-05	1.87398e-05	XPO1/DHX9/NUP205/NUP153/NUP62/SMG5/HNRNPA2B1/POLDIP3/G3BP2/NSUN2/KHSRP/SRSF1/TPR/ALKBH5/SRSF3/SRSF7/IGF2BP2/EIF4A3/CASC3/NUP210/RBM8A/ALYREF/MAGOH/ZFP36L1/MYO1C/SLBP/HNRNPA1	27
BP	GO:0043122	regulation of I-kappaB kinase/NF-kappaB signaling	42/1406	255/18903	8.95314e-07	2.58786e-05	1.87398e-05	ECT2/NUP62/ATP2C1/STAT1/MTDH/DDX21/ABL1/CANT1/TRIM21/IRAK1/DDX1/TRIM22/CTNNB1/TFG/HDAC1/RHOA/OPTN/MYD88/SLC35B2/TNFSF10/TNIP1/SECTM1/RIOK3/TFRC/LITAF/TNFAIP3/S100A4/HSPB1/CD74/CCR7/PLK2/BST2/FLNA/RHOC/UBD/FKBP1A/HLA-DRB1/SQSTM1/TNFRSF1A/CPNE1/GJA1/GAPDH	42
BP	GO:0045185	maintenance of protein location	22/1406	93/18903	9.04212e-07	2.58887e-05	1.87471e-05	HNRNPU/G3BP2/CIZ1/PSMD10/HSPA5/GOLPH3/TWF1/RANGAP1/YWHAB/KDELR2/DBN1/HK1/OS9/SUN2/GPAA1/TSPO/CHCHD10/FLNA/CAV1/SRGN/KDELR1/NFKBIA	22
BP	GO:0006302	double-strand break repair	47/1406	300/18903	9.04665e-07	2.58887e-05	1.87471e-05	DTX3L/MCM6/DEK/ACTR2/PRKDC/FOXM1/PARP9/MSH2/RPA1/UBQLN4/MCM2/TIMELESS/MCM4/RAD21/ACTL6A/ARID1A/VCP/CDCA5/SFPQ/FEN1/PARP1/NUCKS1/SAMHD1/HMGB1/MCM3/DDX1/FUS/PRPF19/SMARCC1/MCM7/XRCC6/XRCC5/RPA2/MCM5/MORF4L1/HMCES/HMGB2/MORF4L2/MAGEF1/ACTB/RMI2/TP53/KDM1A/SMARCB1/TNKS1BP1/PPP4C/CIB1	47
BP	GO:0019885	antigen processing and presentation of endogenous peptide antigen via MHC class I	9/1406	17/18903	9.54783e-07	2.71877e-05	1.96877e-05	TAP1/TAP2/B2M/TAPBP/HLA-E/HLA-C/HLA-B/HLA-A/HLA-F	9
BP	GO:0043487	regulation of RNA stability	34/1406	187/18903	9.87957e-07	2.79937e-05	2.02714e-05	THRAP3/DHX9/HNRNPU/PATL1/LARP1/SERBP1/CNOT1/HNRNPM/HNRNPC/SAMD4B/PAIP1/YTHDF2/NSUN2/SYNCRIP/KHSRP/CSDE1/ALKBH5/YTHDF1/DKC1/PUM2/IGF2BP2/FUS/MAPKAPK2/HNRNPD/E2F1/MYD88/CARHSP1/POLR2G/APEX1/ZFP36L1/YBX3/TNKS1BP1/NPM1/ZFP36L2	34
BP	GO:0010639	negative regulation of organelle organization	54/1406	366/18903	9.98556e-07	2.81554e-05	2.03885e-05	BAZ1B/HNRNPU/PAK2/HUWE1/MCM2/MTPN/RAD21/PLK1/HNRNPC/CDCA8/CKAP2/TPX2/TOP2A/TINF2/CAPZA1/TPR/PSMD10/SPTAN1/PARP1/ZWINT/MAPRE1/SLC25A5/SMARCA5/WASF2/FLII/RAB7A/CCNB1/BIRC5/SPTBN1/CDC20/GDI2/AURKB/TMEM14A/TWF1/STMN1/PTTG1/PFN2/GHITM/LIMA1/TP53/TFRC/BAK1/FKBP4/MET/NPM1/TSPO/HNRNPA1/SSH3/BCL2L1/VAT1/CAPZB/PFN1/LMNA/CIB1	54
BP	GO:0010810	regulation of cell-substrate adhesion	38/1406	222/18903	1.11523e-06	3.12917e-05	2.26596e-05	ABL1/PTPRA/MAP4K4/RCC2/GBP1/TLN1/ADAM15/CORO1C/RIN2/RHOA/CALR/ACTN4/CDKN2A/CDC42/ACTG1/FERMT1/RAC1/JAG1/DAG1/ITGA3/POLDIP2/DDR1/ARPC2/CCR7/FN1/MDK/RAC2/CRKL/MMP14/PLAU/C1QBP/FLNA/P4HB/MMP12/THBS1/FBLN2/JUP/CIB1	38
BP	GO:1904358	positive regulation of telomere maintenance via telomere lengthening	13/1406	37/18903	1.32454e-06	3.69842e-05	2.67818e-05	HNRNPA2B1/DKC1/CCT5/CCT3/CTNNB1/TCP1/XRCC5/CCT6A/AURKB/CCT8/CCT4/CCT7/HNRNPA1	13
BP	GO:0030865	cortical cytoskeleton organization	17/1406	61/18903	1.36835e-06	3.80229e-05	2.7534e-05	ECT2/RACGAP1/ANLN/ARF6/TLN1/RHOA/LCP1/CALR/PLEC/RAC1/WDR1/EHD2/RAC2/RHOG/RHOC/RHOD/EZR	17
BP	GO:0060236	regulation of mitotic spindle organization	14/1406	43/18903	1.49608e-06	4.11745e-05	2.98162e-05	HNRNPU/NUP62/DCTN1/PLK1/TPX2/TPR/DYNC1H1/CHMP5/CLTC/CHMP1B/DRG1/CHMP2B/CHMP1A/CHMP2A	14
BP	GO:0071364	cellular response to epidermal growth factor stimulus	14/1406	43/18903	1.49608e-06	4.11745e-05	2.98162e-05	IQGAP1/PTPN11/PTPN12/MCM7/NCL/PPP1R9B/ZFP36L1/SOX9/EGFR/ZFP36L2/SNAI2/ERRFI1/ID1/EEF1A1	14
BP	GO:0007163	establishment or maintenance of cell polarity	39/1406	234/18903	1.60905e-06	4.40726e-05	3.19148e-05	CKAP5/ACTR2/DCTN1/ACTR3/PLK1/CDC42BPB/KIF2C/ABL1/ARF6/MAPRE1/ITGB1/GOLPH3/CTNNA1/HSP90AA1/RHOA/ATN1/MYH9/RAB10/CLIC4/MSN/CDC42/HSP90AB1/ACTB/ARF4/FERMT1/PTK7/RAC1/WDR1/CAP1/CCR7/RAC2/FSCN1/CRKL/RHOG/RHOC/RHOD/SLC9A3R1/GJA1/LMNA	39
BP	GO:0060337	type I interferon signaling pathway	19/1406	75/18903	1.64158e-06	4.45394e-05	3.22528e-05	ADAR/OAS3/STAT1/YTHDF2/PTPN1/PTPN11/JAK1/OAS2/IRAK1/SAMHD1/LSM14A/STAT2/MYD88/IRF7/OAS1/IFITM1/IFITM3/IFI27/MMP12	19
BP	GO:0071479	cellular response to ionizing radiation	19/1406	75/18903	1.64158e-06	4.45394e-05	3.22528e-05	ECT2/GRB2/NUCKS1/HSPA5/IFI16/XRCC6/XRCC5/TMEM109/TP53/KDM1A/TNKS1BP1/ZMPSTE24/NET1/ITGB6/GADD45A/SNAI2/BCL2L1/EGR1/RPL26	19
BP	GO:1902369	negative regulation of RNA catabolic process	20/1406	82/18903	1.67961e-06	4.49354e-05	3.25396e-05	THRAP3/DHX9/HNRNPU/LARP1/HNRNPC/PAIP1/NSUN2/SYNCRIP/CSDE1/DKC1/IGF2BP2/FUS/MAPKAPK2/HNRNPD/HNRNPAB/E2F1/MYD88/YBX3/PKP3/PKP1	20
BP	GO:1905897	regulation of response to endoplasmic reticulum stress	20/1406	82/18903	1.67961e-06	4.49354e-05	3.25396e-05	UBQLN1/USP14/PTPN1/HSPA5/UBQLN2/HYOU1/PMAIP1/BAG6/TXNDC12/ATF6B/NFE2L2/NCK2/CREB3/BAK1/TMBIM6/MAGEA3/SERINC3/GRINA/CAV1/BCL2L1	20
BP	GO:2000736	regulation of stem cell differentiation	20/1406	82/18903	1.67961e-06	4.49354e-05	3.25396e-05	HNRNPU/PRKDC/STAT3/CHD4/NUDT21/YTHDF2/NSUN2/ABL1/RBBP7/RBBP4/MTCH2/NELFB/HDAC1/MTA2/NFE2L2/HSPA9/TEAD2/JAG1/SOX9/ZFP36L2	20
BP	GO:0046824	positive regulation of nucleocytoplasmic transport	17/1406	62/18903	1.75561e-06	4.67513e-05	3.38546e-05	DHX9/ECT2/IPO5/KHDRBS1/TPR/CDK1/RAN/ANP32B/HSP90AA1/YWHAE/TRIM28/HSP90AB1/BAG3/FLNA/CDH1/TGFB1/JUP	17
BP	GO:0051988	regulation of attachment of spindle microtubules to kinetochore	9/1406	18/18903	1.78321e-06	4.70872e-05	3.40978e-05	HNRNPU/ECT2/RACGAP1/CDCA8/RCC2/CCNB1/BIRC5/AURKB/CDC42	9
BP	GO:0048193	Golgi vesicle transport	46/1406	298/18903	1.79114e-06	4.70872e-05	3.40978e-05	COPB1/SEC23B/ATP2C1/COPB2/ARF3/RAB14/VCP/PITPNB/LMAN1/TEX261/TMED7/SNX12/ARCN1/HYOU1/GOLPH3/VAMP3/YKT6/COPA/TMED10/SCAMP3/TFG/NRBP1/MYO1B/RAB1A/SPTBN1/LAMP1/TMED2/TAPBP/KIF1C/RAB10/OPTN/RAB6A/PEF1/COPG1/RAB1B/KDELR2/ARF4/SEC16A/RAB31/SNX3/TRAPPC6A/KDELR1/ARF5/LAPTM5/LMAN2/TMED9	46
BP	GO:0043488	regulation of mRNA stability	32/1406	175/18903	1.79279e-06	4.70872e-05	3.40978e-05	THRAP3/DHX9/HNRNPU/PATL1/LARP1/SERBP1/CNOT1/HNRNPM/HNRNPC/SAMD4B/PAIP1/YTHDF2/SYNCRIP/KHSRP/CSDE1/ALKBH5/YTHDF1/PUM2/IGF2BP2/FUS/MAPKAPK2/HNRNPD/E2F1/MYD88/CARHSP1/POLR2G/APEX1/ZFP36L1/YBX3/TNKS1BP1/NPM1/ZFP36L2	32
BP	GO:1904814	regulation of protein localization to chromosome, telomeric region	8/1406	14/18903	1.83777e-06	4.76482e-05	3.4504e-05	DKC1/CCT5/CCT3/TCP1/CCT6A/CCT8/CCT4/CCT7	8
BP	GO:1990173	protein localization to nucleoplasm	8/1406	14/18903	1.83777e-06	4.76482e-05	3.4504e-05	DKC1/CCT5/CCT3/TCP1/CCT6A/CCT8/CCT4/CCT7	8
BP	GO:0044843	cell cycle G1/S phase transition	44/1406	280/18903	1.83899e-06	4.76482e-05	3.4504e-05	PSME3/EIF4G1/PRKDC/TFDP1/RRM1/KHDRBS1/CCNA2/CTDSP2/ACTL6A/ARID1A/DDX3X/CUL1/ITGB1/PPP2CA/NASP/CDKN1B/FAM83D/SMARCC1/CDK2/RPA2/E2F4/RRM2/E2F1/GSPT1/CDKN2A/CDKN2B/ACTB/TP53/PAF1/APEX1/PSME1/SMARCB1/RCC1/CDK4/PHB2/EGFR/PLK2/PSME2/SOX2/MYC/TBX2/ANXA1/RPL26/RPS6	44
BP	GO:0062197	cellular response to chemical stress	51/1406	345/18903	1.8707e-06	4.82523e-05	3.49415e-05	ECT2/UBQLN1/MELK/DNAJA1/NFE2L1/DDX3X/ABL1/STAU1/SFPQ/TRIM21/PARP1/CAB39/NONO/ATP2A2/PCNA/CDK1/CTNNB1/MCL1/XRCC5/NFE2L2/HIF1A/SIGMAR1/ZNF622/PLEC/TP53/TNFAIP3/APEX1/PRDX3/ZFP36L1/MET/CHCHD2/YBX3/AXL/TSPO/OSER1/SOD2/DHRS2/HSPB1/EGFR/NET1/ABCC1/PPIA/JUN/CAV1/P4HB/ROMO1/FBP1/GJB2/ERMP1/ANXA1/ERRFI1	51
BP	GO:2001235	positive regulation of apoptotic signaling pathway	27/1406	135/18903	1.92918e-06	4.95386e-05	3.58729e-05	PAK2/SFPQ/PMAIP1/CTNNA1/MCL1/TRAF7/NCK2/TNFSF10/PEA15/TP53/TP63/PDIA3/PPP2R1A/SERINC3/CTSC/MAGED1/PPP1CA/EIF5A/MYC/CTSH/CAV1/PLEKHF1/MAL/THBS1/RPL11/SLC9A3R1/RPL26	27
BP	GO:0010212	response to ionizing radiation	28/1406	143/18903	1.94882e-06	4.97087e-05	3.59961e-05	ECT2/PRKDC/MSH2/GRB2/PARP1/NUCKS1/HSPA5/IFI16/XRCC6/XRCC5/TMEM109/TP53/KDM1A/BAK1/CXCL10/TNKS1BP1/ZMPSTE24/SOD2/NET1/ITGB6/MYC/GADD45A/SNAI2/BCL2L1/EGR1/ANXA1/THBD/RPL26	28
BP	GO:1903050	regulation of proteolysis involved in protein catabolic process	38/1406	227/18903	1.95309e-06	4.97087e-05	3.59961e-05	XPO1/UBQLN1/PSME3/UBQLN4/USP14/PLK1/AURKA/CSNK2A1/PSMD10/NUB1/VCP/PSMC2/RAD23B/UBQLN2/RNF19B/RAD23A/USP5/SMARCC1/BAG6/CDK2/GNA12/CDC20/SDCBP/SUMO1/SUMO2/NFE2L2/USP7/PSMC3/MAGEF1/HSP90AB1/PSME1/CTSC/PSMC4/PSME2/CAV1/RPL11/LAPTM5/EFNA1	38
BP	GO:0051258	protein polymerization	44/1406	281/18903	2.02676e-06	5.12284e-05	3.70966e-05	CKAP5/DIAPH1/DCTN1/MTPN/HAX1/TPX2/CAPZA1/ABL1/GRB2/SPTAN1/ARF6/MAPRE1/RANBP9/FLII/CDKN1B/SPTBN1/HSP90AA1/TUBG1/RHOA/ARPC1A/NCK2/TWF1/GIT1/STMN1/PFN2/DRG1/UBE2C/CDC42EP4/FKBP4/MET/RAC1/DBN1/CDC42EP5/ARPC2/CCR7/SSH3/ARPC1B/CAPZB/PFN1/KRT5/CDC42EP1/COTL1/GPX4/CHMP2A	44
BP	GO:1902903	regulation of supramolecular fiber organization	55/1406	384/18903	2.03061e-06	5.12284e-05	3.70966e-05	PAK2/CKAP5/DCTN1/MTPN/HAX1/CKAP2/TPX2/CAPZA1/HSPA8/ABL1/GRB2/SPTAN1/ARF6/MAPRE1/WASF2/FLII/COLGALT1/CDKN1B/CD47/APP/VBP1/SPTBN1/RHOA/ARPC1A/NCK2/TWF1/GIT1/CDC42/STMN1/PFN2/DRG1/LIMA1/ACTG1/ARF1/CDC42EP4/FKBP4/MET/RAC1/DBN1/CDC42EP5/WDR1/ARPC2/CCR7/SSH3/ARPC1B/FLNA/PFDN5/RHOC/CAPZB/PFN1/CDC42EP1/COTL1/ID1/BRK1/CIB1	55
BP	GO:0042771	intrinsic apoptotic signaling pathway in response to DNA damage by p53 class mediator	14/1406	44/18903	2.04475e-06	5.13598e-05	3.71917e-05	HNRNPK/SNW1/MSH2/IFI16/BAG6/TMEM109/TP53/KDM1A/TP63/CD74/CD44/PHLDA3/ZNF385A/RPL26	14
BP	GO:1990778	protein localization to cell periphery	50/1406	337/18903	2.11386e-06	5.28648e-05	3.82816e-05	ATP2C1/PLK1/PIP5K1A/ZDHHC5/ARF6/ITGB1/CLTC/GOLPH3/VAMP3/PICALM/GBP1/RAB7A/CLSTN1/SPTBN1/KIF5B/TMED2/PPP1R9B/RAB10/OPTN/ACTB/MYL12A/AP2M1/PRNP/SEC16A/RAB31/ATP1B1/PKP3/ATP1B3/RAB38/DAG1/ITGA3/EGFR/EHD2/MMP14/RHOG/FLNA/CAV1/BCL2L1/CDH1/PLEKHF1/FLOT1/MAL/TESC/SQSTM1/TNFRSF1A/TGFB1/SLC9A3R1/JUP/EZR/CIB1	50
BP	GO:0032200	telomere organization	33/1406	185/18903	2.19906e-06	5.46902e-05	3.96034e-05	HNRNPU/PRKDC/SMG5/RPA1/HNRNPA2B1/HNRNPC/ACTL6A/TINF2/FEN1/PARP1/DKC1/PTGES3/PCNA/CCT5/CCT3/CTNNB1/TCP1/XRCC6/XRCC5/RPA2/HNRNPD/HSP90AA1/CCT6A/AURKB/CCT8/CCT4/USP7/CCT7/HSP90AB1/APEX1/TNKS1BP1/HNRNPA1/MYC	33
BP	GO:0007159	leukocyte cell-cell adhesion	58/1406	414/18903	2.20586e-06	5.46902e-05	3.96034e-05	YES1/WNK1/ACTL6A/ARID1A/ABL1/PTPN11/IRAK1/HMGB1/ITGB1/GOLPH3/PRKAR1A/SMARCC1/CD47/SLC7A1/IRF1/ZBTB7B/B2M/RHOA/EFNB2/HSPH1/NCK2/MSN/CD276/HLA-E/HSPD1/ACTB/TNIP1/TFRC/ICAM1/HLA-A/PRNP/NT5E/SMARCB1/PLA2G2F/HLA-DRA/SOX4/PODXL2/ST3GAL4/HLA-DPA1/CD74/CCR7/MDK/RAC2/CD44/HLA-DQA1/CAV1/HLA-DQA2/IGF2/HLA-DMA/HLA-DRB1/VSIG4/HLA-DPB1/ANXA1/LAPTM5/EZR/EFNB1/IDO1/HLA-DQB1	58
BP	GO:1902373	negative regulation of mRNA catabolic process	18/1406	70/18903	2.43077e-06	6.00076e-05	4.3454e-05	THRAP3/DHX9/HNRNPU/LARP1/HNRNPC/PAIP1/SYNCRIP/CSDE1/IGF2BP2/FUS/MAPKAPK2/HNRNPD/HNRNPAB/E2F1/MYD88/YBX3/PKP3/PKP1	18
BP	GO:0048525	negative regulation of viral process	21/1406	91/18903	2.44358e-06	6.00662e-05	4.34964e-05	OAS3/TRIM26/STAT1/SRPK1/PLSCR1/IFIH1/TRIM21/OAS2/IFI16/MX1/ILF3/TRIM28/TNIP1/OAS1/IFIT1/IFITM1/SNX3/IFITM3/PPIA/BST2/LY6E	21
BP	GO:0010332	response to gamma radiation	16/1406	57/18903	2.50977e-06	6.14307e-05	4.44845e-05	PRKDC/PARP1/HSPA5/XRCC6/XRCC5/TMEM109/TP53/KDM1A/BAK1/CXCL10/ZMPSTE24/SOD2/MYC/BCL2L1/EGR1/RPL26	16
BP	GO:0032728	positive regulation of interferon-beta production	13/1406	39/18903	2.62402e-06	6.39548e-05	4.63124e-05	DHX9/OAS3/DDX3X/PTPN11/IFIH1/OAS2/IRF1/HMGB2/HSP90AA1/RIOK3/IRF7/OAS1/FLOT1	13
BP	GO:0009185	ribonucleoside diphosphate metabolic process	24/1406	114/18903	2.75811e-06	6.69396e-05	4.84737e-05	STAT3/RRM1/OGDH/CMPK1/PGM1/APP/RRM2/HIF1A/PGK1/LDHA/GIT1/ENO1/TPI1/AK3/PFKP/PGAM1/NT5E/HK1/ENO2/GPI/PKM/FBP1/EIF6/GAPDH	24
BP	GO:0051222	positive regulation of protein transport	45/1406	294/18903	2.91424e-06	7.04315e-05	5.10024e-05	ECT2/HUWE1/NMT1/IPO5/ATP2C1/TPR/ARF6/GOLPH3/SAE1/OXCT1/CDK1/UBE2D3/RAN/TMED10/ANP32B/SREBF2/HSP90AA1/YWHAE/HIF1A/TRIM28/TM9SF4/HSP90AB1/TMEM30A/TM7SF3/LRRC8A/ADAM9/MYO1C/PRNP/BAG3/SOX4/PDCD5/RAC2/STOM/PPIA/GLUL/UBL5/KCNN4/FLNA/ANO1/CDH1/HLA-DRB1/TGFB1/JUP/EZR/CIB1	45
BP	GO:0046031	ADP metabolic process	21/1406	92/18903	2.94691e-06	7.09231e-05	5.13584e-05	STAT3/OGDH/PGM1/APP/HIF1A/PGK1/LDHA/GIT1/ENO1/TPI1/AK3/PFKP/PGAM1/NT5E/HK1/ENO2/GPI/PKM/FBP1/EIF6/GAPDH	21
BP	GO:0072659	protein localization to plasma membrane	44/1406	285/18903	2.9708e-06	7.12001e-05	5.1559e-05	ATP2C1/PIP5K1A/ZDHHC5/ARF6/ITGB1/CLTC/GOLPH3/VAMP3/PICALM/GBP1/RAB7A/SPTBN1/KIF5B/TMED2/PPP1R9B/RAB10/OPTN/ACTB/MYL12A/AP2M1/PRNP/SEC16A/RAB31/ATP1B1/PKP3/ATP1B3/ITGA3/EGFR/EHD2/MMP14/RHOG/FLNA/BCL2L1/CDH1/PLEKHF1/FLOT1/TESC/SQSTM1/TNFRSF1A/TGFB1/SLC9A3R1/JUP/EZR/CIB1	44
BP	GO:0009141	nucleoside triphosphate metabolic process	42/1406	267/18903	3.04786e-06	7.2744e-05	5.2677e-05	STAT3/HSPA8/VCP/ATP6V1A/PARP1/SAMHD1/OGDH/RAN/TYMS/CMPK1/PGM1/APP/RHOA/STOML2/CTPS1/HIF1A/PGK1/LDHA/GIT1/ENO1/TPI1/AK3/PFKP/PGAM1/DCTPP1/NT5E/ATP1B1/HK1/NME3/NDUFB10/TSPO/NDUFA1/IMPDH1/ENO2/GPI/PKM/NDUFB7/FBP1/EIF6/TGFB1/NDUFS2/GAPDH	42
BP	GO:0070934	CRD-mediated mRNA stabilization	7/1406	11/18903	3.13707e-06	7.45638e-05	5.39948e-05	DHX9/HNRNPU/PAIP1/SYNCRIP/CSDE1/IGF2BP2/HNRNPD	7
BP	GO:0000028	ribosomal small subunit assembly	9/1406	19/18903	3.16406e-06	7.48958e-05	5.42352e-05	PRKDC/XRCC5/RPS28/RPS15/ERAL1/RPL38/RPS14/RPS19/RPSA	9
BP	GO:0032212	positive regulation of telomere maintenance via telomerase	12/1406	34/18903	3.21065e-06	7.56872e-05	5.48083e-05	DKC1/CCT5/CCT3/CTNNB1/TCP1/XRCC5/CCT6A/AURKB/CCT8/CCT4/CCT7/HNRNPA1	12
BP	GO:0042326	negative regulation of phosphorylation	54/1406	381/18903	3.45408e-06	8.10934e-05	5.87231e-05	ADAR/HNRNPU/PAK2/NUP62/IPO5/SNX6/EIF4G1/PRKDC/STAT3/PARP14/PLK1/CTDSP2/IPO7/YWHAG/DNAJA1/PTPN1/ABL1/PRKAR1A/PPP2CA/CDKN1B/CALM3/PIP4K2C/CORO1C/CALM2/TAF7/TMED2/NCK2/CDKN2A/GIT1/CDKN2B/PLEC/BAK1/TNFAIP3/PRDX3/PRNP/PPP2R1A/DYNLL1/CALM1/CADM4/NPM1/HSPB1/CRKL/SPINK1/PPIA/JUN/CAV1/PMEPA1/GADD45A/FBP1/TGFB1/IGFBP3/ERRFI1/UCHL1/CIB1	54
BP	GO:0045787	positive regulation of cell cycle	52/1406	362/18903	3.51531e-06	8.21953e-05	5.95211e-05	HCFC1/HNRNPU/ECT2/RACGAP1/NUP62/EIF4G1/DLGAP5/TFDP1/RRM1/RAD21/CDCA8/AURKA/NUSAP1/DDX3X/TPR/ABL1/PSMD10/CDCA5/PTPN11/PLSCR1/SFPQ/DYNC1H1/CKS1B/TRIM21/FEN1/RCC2/CDK1/RAD23A/CDKN1B/CCNB1/FAM83D/APP/BIRC5/CDC25B/USP22/RHOA/AURKB/RRM2/CALR/CDC42/UBE2C/PAF1/APEX1/CDK4/POLDIP2/NPM1/PHB2/EGFR/CKS2/TBX2/IGF2/ANXA1	52
BP	GO:0043123	positive regulation of I-kappaB kinase/NF-kappaB signaling	33/1406	189/18903	3.56639e-06	8.30506e-05	6.01404e-05	ECT2/NUP62/ATP2C1/MTDH/DDX21/ABL1/CANT1/TRIM21/IRAK1/DDX1/TRIM22/CTNNB1/TFG/RHOA/MYD88/SLC35B2/TNFSF10/SECTM1/TFRC/LITAF/S100A4/CD74/CCR7/PLK2/BST2/FLNA/RHOC/UBD/FKBP1A/HLA-DRB1/TNFRSF1A/GJA1/GAPDH	33
BP	GO:0032507	maintenance of protein location in cell	17/1406	65/18903	3.58076e-06	8.30506e-05	6.01404e-05	HNRNPU/CIZ1/HSPA5/GOLPH3/TWF1/RANGAP1/KDELR2/DBN1/HK1/OS9/SUN2/GPAA1/TSPO/CHCHD10/CAV1/SRGN/KDELR1	17
BP	GO:0042307	positive regulation of protein import into nucleus	13/1406	40/18903	3.62382e-06	8.36748e-05	6.05924e-05	ECT2/IPO5/TPR/CDK1/RAN/HSP90AA1/TRIM28/HSP90AB1/BAG3/FLNA/CDH1/TGFB1/JUP	13
BP	GO:0010592	positive regulation of lamellipodium assembly	11/1406	29/18903	3.66209e-06	8.36748e-05	6.05924e-05	ACTR2/ACTR3/AKIRIN1/WASF2/HSP90AA1/CDC42/RAC1/ARPC2/RAC2/FSCN1/BRK1	11
BP	GO:1902175	regulation of oxidative stress-induced intrinsic apoptotic signaling pathway	11/1406	29/18903	3.66209e-06	8.36748e-05	6.05924e-05	UBQLN1/SFPQ/PARP1/NONO/MCL1/NFE2L2/HIF1A/SOD2/HSPB1/PPIA/P4HB	11
BP	GO:0030174	regulation of DNA-templated DNA replication initiation	8/1406	15/18903	3.68041e-06	8.36748e-05	6.05924e-05	MCM6/MCM2/MCM4/CIZ1/MCM3/MCM7/CDK2/MCM5	8
BP	GO:1904874	positive regulation of telomerase RNA localization to Cajal body	8/1406	15/18903	3.68041e-06	8.36748e-05	6.05924e-05	DKC1/CCT5/CCT3/TCP1/CCT6A/CCT8/CCT4/CCT7	8
BP	GO:0090068	positive regulation of cell cycle process	41/1406	260/18903	3.73597e-06	8.40664e-05	6.0876e-05	HNRNPU/ECT2/RACGAP1/NUP62/EIF4G1/DLGAP5/TFDP1/RRM1/RAD21/CDCA8/AURKA/NUSAP1/DDX3X/TPR/CDCA5/PLSCR1/SFPQ/DYNC1H1/FEN1/RCC2/CDK1/CCNB1/FAM83D/APP/BIRC5/CDC25B/RHOA/AURKB/RRM2/CDC42/UBE2C/PAF1/APEX1/CDK4/POLDIP2/NPM1/PHB2/EGFR/TBX2/IGF2/ANXA1	41
BP	GO:1902410	mitotic cytokinetic process	10/1406	24/18903	3.74148e-06	8.40664e-05	6.0876e-05	NUP62/CEP55/KIF20A/CHMP5/CHMP1B/RHOA/ARF1/CHMP2B/CHMP1A/CHMP2A	10
BP	GO:1903241	U2-type prespliceosome assembly	10/1406	24/18903	3.74148e-06	8.40664e-05	6.0876e-05	SF3A1/SF3B2/SF3A3/HTATSF1/SF3B3/PHF5A/SF3B4/SF3B1/SNRPB/SNRPD3	10
BP	GO:0042770	signal transduction in response to DNA damage	32/1406	181/18903	3.79341e-06	8.48195e-05	6.14214e-05	PRKDC/FOXM1/MSH2/PLK1/ABL1/PSMD10/GRB2/PTPN11/COPS3/PMAIP1/CDK1/CDKN1B/PRPF19/CDK2/RPA2/E2F1/DDX5/TP53/KDM1A/SOX4/ZMPSTE24/NPM1/BATF/CD74/PLK2/PTTG1IP/CD44/GADD45A/SNAI2/NDRG1/ZNF385A/RPL26	32
BP	GO:0051702	biological process involved in interaction with symbiont	24/1406	116/18903	3.80449e-06	8.48195e-05	6.14214e-05	SNW1/PAIP1/DDB1/HSPA8/NUCKS1/TAF11/HDAC1/MYD88/PSMC3/CDC42/HSPD1/CAV2/SMARCB1/FN1/STOM/IFI27/CSF1R/JUN/FASN/ROMO1/CFL1/KRT6A/GAPDH/EEF1A1	24
BP	GO:0048732	gland development	60/1406	441/18903	3.84886e-06	8.54775e-05	6.18978e-05	PRMT5/PYGO2/AURKA/ABL1/ARF6/OAS2/JARID2/PCNA/TYMS/PLXNA1/CDKN1B/CCNB2/CTNNB1/HNRNPD/ZBTB7B/HIF1A/MSN/CDKN2B/MAFB/SLC7A5/ITGA2/TNFAIP3/TP63/FKBP4/MET/SMARCB1/RAF1/PRKCSH/DAG1/RTN4/ZMPSTE24/TSPO/SOD2/PHB2/TNC/DDR1/SOX9/EGFR/MDK/CRKL/CLDN1/PSAP/CAPN1/CSF1R/SOX2/JUN/CAV1/SNAI2/FASN/TBX2/CDH1/IGF2/SERPINB5/TGFB1/IRF6/ANXA1/SLC9A3R1/PITX1/APRT/AREG	60
BP	GO:0007249	I-kappaB kinase/NF-kappaB signaling	44/1406	288/18903	3.93119e-06	8.68054e-05	6.28594e-05	ECT2/NUP62/ATP2C1/STAT1/MTDH/DDX21/ABL1/CANT1/TRIM21/IRAK1/DDX1/TRIM22/CTNNB1/TFG/HDAC1/RHOA/OPTN/MYD88/SLC35B2/TNFSF10/TNIP1/SECTM1/RIOK3/TFRC/LITAF/TNFAIP3/S100A4/HSPB1/CD74/PRDX4/CCR7/PLK2/BST2/FLNA/RHOC/UBD/FKBP1A/HLA-DRB1/SQSTM1/NFKBIA/TNFRSF1A/CPNE1/GJA1/GAPDH	44
BP	GO:0032204	regulation of telomere maintenance	22/1406	101/18903	3.93884e-06	8.68054e-05	6.28594e-05	HNRNPU/SMG5/HNRNPA2B1/HNRNPC/ACTL6A/TINF2/PARP1/DKC1/CCT5/CCT3/CTNNB1/TCP1/XRCC5/HNRNPD/CCT6A/AURKB/CCT8/CCT4/USP7/CCT7/HNRNPA1/MYC	22
BP	GO:1903313	positive regulation of mRNA metabolic process	27/1406	140/18903	3.9908e-06	8.76148e-05	6.34456e-05	THRAP3/DHX9/HNRNPU/SNW1/PATL1/CNOT1/PRMT5/SAMD4B/NUDT21/PAIP1/RBMX/YTHDF2/SYNCRIP/KHSRP/HSPA8/CSDE1/YTHDF1/PRPF19/SF3B4/HNRNPD/NCL/PAF1/POLR2G/PRDX6/ZFP36L1/TNKS1BP1/ZFP36L2	27
BP	GO:0006611	protein export from nucleus	16/1406	59/18903	4.12599e-06	8.98966e-05	6.50979e-05	XPO1/XPO6/TPR/PTPN11/CSE1L/RAN/AHCYL1/ANP32B/UHMK1/CALR/YWHAE/HSPA9/RANGAP1/BAG3/IFI27/TGFB1	16
BP	GO:0042306	regulation of protein import into nucleus	16/1406	59/18903	4.12599e-06	8.98966e-05	6.50979e-05	ECT2/IPO5/TPR/CDK1/RAN/NOLC1/HSP90AA1/SUMO1/TRIM28/HSP90AB1/FERMT1/BAG3/FLNA/CDH1/TGFB1/JUP	16
BP	GO:0090316	positive regulation of intracellular protein transport	29/1406	157/18903	4.37406e-06	9.49419e-05	6.87514e-05	ECT2/HUWE1/NMT1/IPO5/TPR/SAE1/CDK1/UBE2D3/RAN/ANP32B/SREBF2/HSP90AA1/YWHAE/TRIM28/TM9SF4/HSP90AB1/TMEM30A/MYO1C/PRNP/BAG3/PDCD5/RAC2/STOM/UBL5/FLNA/CDH1/TGFB1/JUP/CIB1	29
BP	GO:0048145	regulation of fibroblast proliferation	20/1406	87/18903	4.49039e-06	9.71005e-05	7.03145e-05	DHX9/CCNA2/ABL1/CCNB1/CTNNB1/E2F1/S100A6/FOSL2/TP53/CDK4/ZMPSTE24/SOD2/CD74/EGFR/FN1/MYC/JUN/CAV1/BRK1/FTH1	20
BP	GO:0000956	nuclear-transcribed mRNA catabolic process	25/1406	125/18903	4.57578e-06	9.77087e-05	7.0755e-05	THRAP3/DHX9/HNRNPU/XRN2/PATL1/SMG5/CNOT1/SAMD4B/PAIP1/ETF1/SYNCRIP/CSDE1/EIF4A3/CASC3/HNRNPD/HNRNPAB/RBM8A/GSPT1/DDX5/MAGOH/POLR2G/ZFP36L1/TNKS1BP1/ZFP36L2/LSM7	25
BP	GO:1904375	regulation of protein localization to cell periphery	25/1406	125/18903	4.57578e-06	9.77087e-05	7.0755e-05	ATP2C1/PLK1/ZDHHC5/ARF6/ITGB1/CLTC/PICALM/GBP1/SPTBN1/KIF5B/PPP1R9B/ACTB/AP2M1/PRNP/RAB38/DAG1/ITGA3/EGFR/MMP14/RHOG/BCL2L1/SQSTM1/TGFB1/EZR/CIB1	25
BP	GO:0032434	regulation of proteasomal ubiquitin-dependent protein catabolic process	27/1406	141/18903	4.59152e-06	9.77087e-05	7.0755e-05	XPO1/UBQLN1/UBQLN4/USP14/PLK1/AURKA/PSMD10/NUB1/VCP/RAD23B/UBQLN2/RNF19B/RAD23A/USP5/SMARCC1/BAG6/CDK2/GNA12/CDC20/SDCBP/SUMO1/SUMO2/NFE2L2/USP7/HSP90AB1/CAV1/RPL11	27
BP	GO:0006890	retrograde vesicle-mediated transport, Golgi to endoplasmic reticulum	15/1406	53/18903	4.60345e-06	9.77087e-05	7.0755e-05	COPB2/ARF3/PITPNB/ARCN1/GOLPH3/COPA/TMED10/TAPBP/KIF1C/RAB6A/KDELR2/ARF4/KDELR1/ARF5/LMAN2	15
BP	GO:0052372	modulation by symbiont of entry into host	15/1406	53/18903	4.60345e-06	9.77087e-05	7.0755e-05	TRIM26/TRIM21/HMGB1/TRIM22/ITGAV/IFITM1/SNX3/CD74/IFITM3/FURIN/CAV1/P4HB/KRT6A/HLA-DRB1/LY6E	15
BP	GO:0090224	regulation of spindle organization	14/1406	47/18903	4.91824e-06	0.000104006	7.53153e-05	HNRNPU/NUP62/DCTN1/PLK1/TPX2/TPR/DYNC1H1/CHMP5/CLTC/CHMP1B/DRG1/CHMP2B/CHMP1A/CHMP2A	14
BP	GO:0010821	regulation of mitochondrion organization	28/1406	150/18903	5.15365e-06	0.000108585	7.86312e-05	HUWE1/NMT1/HAX1/AURKA/PSMD10/STAT2/SLC25A5/GOLPH3/PMAIP1/RALA/PGAM5/MTCH2/SREBF2/STOML2/TMEM14A/HIF1A/TNFSF10/GHITM/TP53/TFRC/BAK1/TSPO/PDCD5/CHCHD10/BCL2L1/VAT1/SQSTM1/LMNA	28
BP	GO:0032535	regulation of cellular component size	52/1406	367/18903	5.25775e-06	0.000110374	7.99267e-05	MTPN/ADNP/WDTC1/HAX1/CAPZA1/ABL1/GRB2/HP1BP3/SNAPIN/SPTAN1/ARF6/PICALM/FLII/SPTBN1/HSP90AA1/RHOA/E2F4/ARPC1A/NCK2/TWF1/GDI1/MSN/PFN2/LIMA1/HSP90AB1/KDM1A/LRRC8A/CDC42EP4/AP2M1/RAC1/LAMTOR4/DBN1/CDC42EP5/RTN4/WDR1/NPM1/SLC12A7/ARPC2/CCR7/FN1/SSH3/PPP1CA/ARPC1B/KCNN4/CDH1/CAPZB/PFN1/CDC42EP1/COTL1/SLC9A3R1/BRK1/EZR	52
BP	GO:0006888	endoplasmic reticulum to Golgi vesicle-mediated transport	26/1406	134/18903	5.33076e-06	0.0001115	8.07418e-05	COPB1/SEC23B/COPB2/VCP/LMAN1/TEX261/TMED7/ARCN1/HYOU1/YKT6/COPA/TMED10/TFG/NRBP1/RAB1A/TMED2/PEF1/COPG1/RAB1B/KDELR2/ARF4/SEC16A/TRAPPC6A/KDELR1/LMAN2/TMED9	26
BP	GO:0070198	protein localization to chromosome, telomeric region	11/1406	30/18903	5.39441e-06	0.000112327	8.13408e-05	TINF2/DKC1/CCT5/CCT3/TCP1/XRCC5/TPP1/CCT6A/CCT8/CCT4/CCT7	11
BP	GO:0033627	cell adhesion mediated by integrin	20/1406	88/18903	5.40936e-06	0.000112327	8.13408e-05	WNK1/PTPN11/ITGB1/ITGAV/ITGA6/ICAM1/ITGA2/FERMT1/ADAM9/ITGB4/ITGA3/ITGB6/CRKL/ITGB5/PLAU/SNAI2/TESC/CXCL13/EFNA1/CIB1	20
BP	GO:1903076	regulation of protein localization to plasma membrane	22/1406	103/18903	5.53082e-06	0.000114436	8.2868e-05	ATP2C1/ZDHHC5/ARF6/ITGB1/CLTC/PICALM/GBP1/SPTBN1/KIF5B/PPP1R9B/ACTB/AP2M1/PRNP/ITGA3/EGFR/MMP14/RHOG/BCL2L1/SQSTM1/TGFB1/EZR/CIB1	22
BP	GO:1902743	regulation of lamellipodium organization	15/1406	54/18903	5.93878e-06	0.000122437	8.86616e-05	ACTR2/ACTR3/AKIRIN1/WASF2/CORO1C/HSP90AA1/TWF1/CDC42/RAC1/ARPC2/RAC2/CD44/FSCN1/CAPZB/BRK1	15
BP	GO:0061136	regulation of proteasomal protein catabolic process	33/1406	194/18903	6.36723e-06	0.000130801	9.47185e-05	XPO1/UBQLN1/PSME3/UBQLN4/USP14/PLK1/AURKA/PSMD10/NUB1/VCP/PSMC2/RAD23B/UBQLN2/RNF19B/RAD23A/USP5/SMARCC1/BAG6/CDK2/GNA12/CDC20/SDCBP/SUMO1/SUMO2/NFE2L2/USP7/PSMC3/HSP90AB1/PSME1/PSMC4/PSME2/CAV1/RPL11	33
BP	GO:0051017	actin filament bundle assembly	29/1406	160/18903	6.43941e-06	0.000131813	9.54514e-05	PAK2/ABL1/WASF2/TNFAIP1/CD47/HSP90B1/MYO1B/RHOA/LCP1/CDC42/STMN1/PFN2/LIMA1/ACTG1/ACTN1/MET/RAC1/ZYX/PLS3/FSCN1/ITGB5/FLNA/MARCKS/RHOC/PFN1/RHOD/DPYSL3/ID1/EZR	29
BP	GO:0010591	regulation of lamellipodium assembly	13/1406	42/18903	6.67869e-06	0.000136226	9.86472e-05	ACTR2/ACTR3/AKIRIN1/WASF2/HSP90AA1/TWF1/CDC42/RAC1/ARPC2/RAC2/FSCN1/CAPZB/BRK1	13
BP	GO:0048863	stem cell differentiation	39/1406	248/18903	6.83016e-06	0.000138472	0.000100274	HNRNPU/PRKDC/STAT3/CHD4/NUDT21/YTHDF2/NSUN2/ABL1/RBBP7/JARID2/ITGB1/RBBP4/PHF5A/MTCH2/NELFB/CTNNB1/XRCC5/NOLC1/HDAC1/CORO1C/MTA2/PSMD11/NFE2L2/HIF1A/HSPA9/PEF1/CDC42/TEAD2/TP53/TP63/JAG1/SOX9/BATF/FN1/ZFP36L2/SNAI2/TBX2/EPCAM/EFNB1	39
BP	GO:0051303	establishment of chromosome localization	19/1406	82/18903	6.83695e-06	0.000138472	0.000100274	HNRNPU/KPNB1/NUP62/KIFC1/CDCA8/KIF2C/CDCA5/DYNC1H1/CHMP5/MAPRE1/CCNB1/FAM83D/BIRC5/CHMP1B/AURKB/CHMP2B/CHMP1A/KIF22/CHMP2A	19
BP	GO:0001731	formation of translation preinitiation complex	7/1406	12/18903	7.04332e-06	0.000142152	0.000102938	EIF4H/DENR/EIF2S3/EIF5/EIF2S2/EIF4B/RPL13A	7
BP	GO:0070585	protein localization to mitochondrion	25/1406	128/18903	7.11325e-06	0.000143061	0.000103596	HUWE1/NMT1/HAX1/MFN2/DNAJA1/LMAN1/SAE1/RALA/UBE2D3/CALM3/MTCH2/SREBF2/HSP90AA1/HSPA4/TOMM20/HSPD1/HK1/BAG3/TIMM23/TOMM22/TSPO/PDCD5/RAC2/UBL5/ROMO1	25
BP	GO:0006405	RNA export from nucleus	20/1406	90/18903	7.77372e-06	0.000155799	0.000112821	DHX9/NUP153/NUP62/SMG5/HNRNPA2B1/KHDRBS1/POLDIP3/NSUN2/TPR/XPOT/ALKBH5/SRSF3/RAN/EIF4A3/CASC3/RBM8A/ALYREF/MAGOH/NPM1/HNRNPA1	20
BP	GO:2000058	regulation of ubiquitin-dependent protein catabolic process	30/1406	170/18903	7.82507e-06	0.000156284	0.000113172	XPO1/UBQLN1/UBQLN4/USP14/PLK1/AURKA/CSNK2A1/PSMD10/NUB1/VCP/RAD23B/UBQLN2/RNF19B/RAD23A/USP5/SMARCC1/BAG6/CDK2/GNA12/CDC20/SDCBP/SUMO1/SUMO2/NFE2L2/USP7/MAGEF1/HSP90AB1/CAV1/RPL11/LAPTM5	30
BP	GO:0006096	glycolytic process	19/1406	83/18903	8.2552e-06	0.000164304	0.000118979	STAT3/OGDH/PGM1/APP/HIF1A/PGK1/LDHA/GIT1/ENO1/TPI1/PFKP/PGAM1/HK1/ENO2/GPI/PKM/FBP1/EIF6/GAPDH	19
BP	GO:1901653	cellular response to peptide	52/1406	373/18903	8.39891e-06	0.000166588	0.000120633	SNX6/PRKDC/STAT3/TIMELESS/CCNA2/WDTC1/STAT1/YWHAG/PTPN1/GRB2/PTPRA/PTPN11/JAK1/PARP1/NUCKS1/CHMP5/PIP4K2C/SMARCC1/AHCYL1/APP/ADIPOR1/NCL/ZBTB7B/EIF4EBP2/PPP1R9B/NFE2L2/RAB10/SHC1/RANGAP1/TP53/ICAM1/APEX1/CAV2/ZFP36L1/MYO1C/PRNP/RAB31/CDK4/AGTRAP/GNAI2/ABCC1/SPINK1/CAV1/ANO1/PKM/IGF2/FBP1/GJB2/ERRFI1/ID1/GJA1/APRT	52
BP	GO:0035987	endodermal cell differentiation	14/1406	49/18903	8.44332e-06	0.000166893	0.000120855	GRB2/CTNNB1/ITGAV/PAF1/LAMA3/LAMB3/LAMB1/FN1/ITGB5/MMP14/SOX2/COL12A1/COL7A1/COL5A2	14
BP	GO:0006734	NADH metabolic process	12/1406	37/18903	8.79676e-06	0.000172693	0.000125054	VCP/OGDH/MDH1/PGK1/ENO1/TPI1/TP53/PFKP/HK1/MDH2/ENO2/PKM	12
BP	GO:1902745	positive regulation of lamellipodium organization	12/1406	37/18903	8.79676e-06	0.000172693	0.000125054	ACTR2/ACTR3/AKIRIN1/WASF2/CORO1C/HSP90AA1/CDC42/RAC1/ARPC2/RAC2/FSCN1/BRK1	12
BP	GO:0032956	regulation of actin cytoskeleton organization	51/1406	365/18903	9.59277e-06	0.000187361	0.000135676	ECT2/PAK2/MTPN/HAX1/IQGAP1/CAPZA1/ABL1/GRB2/SPTAN1/ARF6/WASF2/FLII/CD47/SPTBN1/RHOA/ARPC1A/NCK2/TWF1/CDC42/STMN1/PFN2/SMIM22/LIMA1/ACTG1/ARF1/CDC42EP4/MET/ARHGDIA/RAC1/DBN1/CDC42EP5/WDR1/ARPC2/CCR7/MDK/SSH3/RAC2/FSCN1/CSF1R/BST2/ARPC1B/RHOG/FLNA/RHOC/CAPZB/PFN1/RHOD/CDC42EP1/COTL1/ID1/BRK1	51
BP	GO:0006979	response to oxidative stress	58/1406	434/18903	9.63219e-06	0.000187361	0.000135676	ECT2/UBQLN1/MELK/HNRNPM/STAT1/NFE2L1/ABL1/STAU1/SFPQ/PSIP1/PARP1/NONO/ATP2A2/PCNA/CDK1/CTNNB1/MCL1/APP/CAPN2/NFE2L2/HIF1A/SIGMAR1/ZNF622/PSMB5/TP53/BAK1/PRDX6/TNFAIP3/APEX1/PRDX3/MET/ADAM9/CHCHD2/PRNP/AXL/OSER1/SOD2/DHRS2/HSPB1/PRDX4/EGFR/NET1/GSS/ABCC1/GPX2/PPIA/DHCR24/MMP14/JUN/P4HB/ROMO1/TXNIP/GJB2/ERMP1/NDUFS2/ANXA1/AREG/GPX4	58
BP	GO:0090150	establishment of protein localization to membrane	41/1406	270/18903	9.64168e-06	0.000187361	0.000135676	NMT1/SRP72/ATP2C1/HSPA5/SEC61A1/GOLPH3/SSR3/VAMP3/ICMT/RAB7A/CALM3/UBL4A/BAG6/CLSTN1/SPTBN1/HSP90AA1/SDCBP/HSPA4/CCDC47/RAB10/OPTN/PEX19/SRP9/GDI1/TOMM20/MICALL1/ARL6IP1/MYO1C/PRNP/SEC16A/RAB31/ATP1B1/SSR2/TOMM22/PDCD5/EGFR/STOM/ROMO1/MAL/TRAM1/CIB1	41
BP	GO:0006470	protein dephosphorylation	40/1406	261/18903	9.8611e-06	0.00019098	0.000138297	PPP1R8/PTBP1/CTDSP2/PTPN1/PTPRA/PTPN11/PTPN12/PPP2R5D/PPP2CA/PGAM5/ARPP19/PPP4R1/PPP1CB/CALM3/PPP1R11/PPM1G/HSP90B1/GNA12/CALM2/PPP1CC/PPP6R1/PTPRF/CDC25B/PTP4A1/PPP1R9B/YWHAE/CTDNEP1/HSP90AB1/YWHAB/PTP4A2/PPP2R1A/CALM1/ENSA/GNAI2/SSH3/PPP1CA/PPIA/FKBP1A/TGFB1/PPP4C	40
BP	GO:0006757	ATP generation from ADP	19/1406	84/18903	9.93273e-06	0.00019129	0.000138521	STAT3/OGDH/PGM1/APP/HIF1A/PGK1/LDHA/GIT1/ENO1/TPI1/PFKP/PGAM1/HK1/ENO2/GPI/PKM/FBP1/EIF6/GAPDH	19
BP	GO:1905475	regulation of protein localization to membrane	30/1406	172/18903	9.94364e-06	0.00019129	0.000138521	NMT1/ATP2C1/ZDHHC5/ARF6/ITGB1/CLTC/PICALM/GBP1/SPTBN1/KIF5B/PPP1R9B/GDI1/ACTB/AP2M1/MYO1C/PRNP/DAG1/ITGA3/PDCD5/EGFR/CRKL/STOM/MMP14/RHOG/BCL2L1/SQSTM1/TGFB1/GPC1/EZR/CIB1	30
BP	GO:0007062	sister chromatid cohesion	16/1406	63/18903	1.03754e-05	0.000198931	0.000144054	SMC1A/CTCF/CHTF8/SMC3/STAG2/RAD21/PLK1/NAA50/CDCA5/SFPQ/FEN1/CTNNB1/CDC20/PPP2R1A/KIF22/PHB2	16
BP	GO:0061572	actin filament bundle organization	29/1406	164/18903	1.05811e-05	0.000201548	0.00014595	PAK2/ABL1/WASF2/TNFAIP1/CD47/HSP90B1/MYO1B/RHOA/LCP1/CDC42/STMN1/PFN2/LIMA1/ACTG1/ACTN1/MET/RAC1/ZYX/PLS3/FSCN1/ITGB5/FLNA/MARCKS/RHOC/PFN1/RHOD/DPYSL3/ID1/EZR	29
BP	GO:0043489	RNA stabilization	17/1406	70/18903	1.0582e-05	0.000201548	0.00014595	THRAP3/DHX9/HNRNPU/LARP1/HNRNPC/PAIP1/NSUN2/SYNCRIP/CSDE1/DKC1/IGF2BP2/FUS/MAPKAPK2/HNRNPD/E2F1/MYD88/YBX3	17
BP	GO:0001819	positive regulation of cytokine production	63/1406	486/18903	1.0812e-05	0.000205249	0.00014863	DHX9/OAS3/STAT3/STAT1/DDX21/DDX3X/ABL1/PTPN11/IFIH1/OAS2/IRAK1/HMGB1/DDX1/TMED10/IFI16/MAPKAPK2/APP/RAB1A/IRF1/SPTBN1/ZBTB7B/HMGB2/B2M/HSP90AA1/ATP6AP2/STOML2/HIF1A/MYD88/CD276/HLA-E/HSPD1/RIOK3/SLC7A5/FERMT1/IRF7/HLA-A/HLA-F/OAS1/IFNGR1/AIM2/HK1/CYBB/HLA-DPA1/HSPB1/BATF/CD74/CCR7/FCGR3A/F3/MDK/FURIN/CSF1R/FLOT1/MMP12/THBS1/EGR1/TGFB1/HLA-DPB1/ANXA1/LAPTM5/GAPDH/FCER1G/IDO1	63
BP	GO:0034502	protein localization to chromosome	23/1406	115/18903	1.0871e-05	0.000205691	0.00014895	CTCF/MSH2/RPA1/RAD21/PLK1/TINF2/VCP/CDCA5/DKC1/RCC2/JARID2/CCT5/CCT3/CDK1/TCP1/XRCC5/RPA2/TPP1/CCT6A/AURKB/CCT8/CCT4/CCT7	23
BP	GO:0072655	establishment of protein localization to mitochondrion	24/1406	123/18903	1.09604e-05	0.000206702	0.000149681	HUWE1/NMT1/HAX1/MFN2/DNAJA1/LMAN1/SAE1/RALA/UBE2D3/CALM3/SREBF2/HSP90AA1/HSPA4/TOMM20/HSPD1/HK1/BAG3/TIMM23/TOMM22/TSPO/PDCD5/RAC2/UBL5/ROMO1	24
BP	GO:0032273	positive regulation of protein polymerization	20/1406	92/18903	1.1033e-05	0.00020712	0.000149984	CKAP5/DCTN1/GRB2/ARF6/MAPRE1/CDKN1B/HSP90AA1/RHOA/NCK2/GIT1/PFN2/DRG1/CDC42EP4/MET/RAC1/CDC42EP5/ARPC2/CCR7/PFN1/CDC42EP1	20
BP	GO:0045070	positive regulation of viral genome replication	11/1406	32/18903	1.10906e-05	0.00020712	0.000149984	ADAR/LARP1/SRPK1/TOP2A/DDB1/DDX3X/STAU1/RAD23A/IFIT1/PPIA/TOP2B	11
BP	GO:1902235	regulation of endoplasmic reticulum stress-induced intrinsic apoptotic signaling pathway	11/1406	32/18903	1.10906e-05	0.00020712	0.000149984	PTPN1/HYOU1/PMAIP1/TXNDC12/NCK2/CREB3/TMBIM6/MAGEA3/SERINC3/GRINA/BCL2L1	11
BP	GO:0006165	nucleoside diphosphate phosphorylation	21/1406	100/18903	1.184e-05	0.000219689	0.000159086	STAT3/OGDH/CMPK1/PGM1/APP/HIF1A/PGK1/LDHA/GIT1/ENO1/TPI1/PFKP/PGAM1/HK1/NME3/ENO2/GPI/PKM/FBP1/EIF6/GAPDH	21
BP	GO:0019080	viral gene expression	21/1406	100/18903	1.184e-05	0.000219689	0.000159086	DHX9/SNW1/PARP9/PTBP1/DENR/CANX/CSDE1/TRIM21/EIF3A/NUCKS1/TAF11/HDAC1/EIF3B/PCBP2/PSMC3/EIF3L/SMARCB1/ST3GAL4/IFITM3/FURIN/JUN	21
BP	GO:0042254	ribosome biogenesis	45/1406	310/18903	1.19233e-05	0.000220523	0.00015969	XPO1/XRN2/PRKDC/WBP11/YTHDF2/DDX21/DDX3X/DKC1/RAN/EIF4A3/XRCC5/NOLC1/TRAF7/ABCE1/NOP56/ZNF622/RPS28/SBDS/RPS15/RIOK3/RPL14/PES1/TSR2/ERAL1/DDX17/RPL24/RSL1D1/RPS24/NPM1/RPL38/GLUL/RPS8/RPS25/C1QBP/RPS14/RPS19/RPSA/RPL23A/EIF6/RPL11/RPS21/RPL26/RPL27/RPL35/RPS6	45
BP	GO:0070200	establishment of protein localization to telomere	8/1406	17/18903	1.21462e-05	0.000223926	0.000162154	DKC1/CCT5/CCT3/TCP1/CCT6A/CCT8/CCT4/CCT7	8
BP	GO:0045071	negative regulation of viral genome replication	15/1406	57/18903	1.22448e-05	0.000224306	0.000162429	OAS3/SRPK1/PLSCR1/IFIH1/OAS2/IFI16/MX1/ILF3/TRIM28/TNIP1/OAS1/IFIT1/IFITM1/IFITM3/BST2	15
BP	GO:0090329	regulation of DNA-templated DNA replication	15/1406	57/18903	1.22448e-05	0.000224306	0.000162429	MCM6/CHTF8/MCM2/TIMELESS/MCM4/CIZ1/MCM3/PCNA/RFC2/MCM7/RFC4/CDK2/MCM5/STOML2/ZMPSTE24	15
BP	GO:0009132	nucleoside diphosphate metabolic process	25/1406	132/18903	1.24808e-05	0.000227183	0.000164512	STAT3/RRM1/OGDH/CMPK1/PGM1/APP/RRM2/HIF1A/PGK1/LDHA/GIT1/ENO1/TPI1/AK3/PFKP/PGAM1/NT5E/HK1/NME3/ENO2/GPI/PKM/FBP1/EIF6/GAPDH	25
BP	GO:0051983	regulation of chromosome segregation	25/1406	132/18903	1.24808e-05	0.000227183	0.000164512	HNRNPU/DLGAP5/MKI67/RAD21/PLK1/ACTL6A/CDCA8/ARID1A/KIF2C/TPR/CSNK2A1/PLSCR1/ZWINT/RCC2/PUM2/CCNB1/SMARCC1/BIRC5/CDC20/AURKB/PTTG1/UBE2C/ACTB/RMI2/SMARCB1	25
BP	GO:0098586	cellular response to virus	23/1406	116/18903	1.26187e-05	0.000228967	0.000165805	ADAR/OAS3/DDX3X/JAK1/IFIH1/LSM14A/PUM2/DDX60/HSP90AA1/CALR/HIF1A/RIOK3/ARF1/IFNGR2/IRF7/IFI6/OAS1/IFNGR1/CXCL10/PHB2/EIF5A/C1QBP/MMP12	23
BP	GO:0010038	response to metal ion	50/1406	360/18903	1.3793e-05	0.000249488	0.000180665	ECT2/ITPR3/DAXX/IQGAP1/PLSCR1/PARP1/HSPA5/PCNA/PPP2CA/CDK1/CDKN1B/CALM3/AHCYL1/APP/HNRNPD/CALM2/NCSTN/B2M/SUMO1/NFE2L2/CALR/HIF1A/CLIC4/GDI1/PEF1/ACTG1/TFRC/ADAM9/PRNP/CALM1/TSPO/SOD2/S100A16/CYBB/EGFR/GSS/PPP1CA/CLDN1/JUN/CAV1/GPI/CDH1/TXNIP/THBS1/FBP1/JUND/NDRG1/SLC40A1/CPNE1/SYT8	50
BP	GO:0031396	regulation of protein ubiquitination	34/1406	210/18903	1.38745e-05	0.000249503	0.000180676	DTX3L/HUWE1/UBQLN1/DAXX/PLK1/DNAJA1/DDX3X/ABL1/PSMD10/HSPA5/U2AF2/CDC20/HSP90AA1/IVNS1ABP/PEF1/RPS15/HSP90AB1/UBE2C/KDM1A/ARRDC3/TNFAIP3/RPS2/RPS20/SOX4/NPM1/TSPO/PTTG1IP/PPIA/CAV1/FKBP1A/SQSTM1/RPL37/RPL11/LAPTM5	34
BP	GO:0032069	regulation of nuclease activity	9/1406	22/18903	1.38806e-05	0.000249503	0.000180676	OAS3/OAS2/HMGB1/PCNA/HMGB2/ABCE1/TMBIM6/OAS1/NPM1	9
BP	GO:0001952	regulation of cell-matrix adhesion	24/1406	125/18903	1.45643e-05	0.000260978	0.000188985	ABL1/PTPRA/MAP4K4/RCC2/TLN1/ADAM15/CORO1C/RIN2/RHOA/CDKN2A/ACTG1/FERMT1/RAC1/JAG1/DAG1/POLDIP2/DDR1/CCR7/MMP14/PLAU/MMP12/THBS1/JUP/CIB1	24
BP	GO:0009144	purine nucleoside triphosphate metabolic process	38/1406	247/18903	1.49037e-05	0.00026623	0.000192788	STAT3/HSPA8/VCP/ATP6V1A/PARP1/SAMHD1/OGDH/RAN/PGM1/APP/RHOA/STOML2/HIF1A/PGK1/LDHA/GIT1/ENO1/TPI1/AK3/PFKP/PGAM1/NT5E/ATP1B1/HK1/NME3/NDUFB10/TSPO/NDUFA1/IMPDH1/ENO2/GPI/PKM/NDUFB7/FBP1/EIF6/TGFB1/NDUFS2/GAPDH	38
BP	GO:0006310	DNA recombination	47/1406	332/18903	1.50261e-05	0.000267585	0.000193769	MCM6/ACTR2/TSN/PRKDC/MSH2/RPA1/UBQLN4/MCM2/TIMELESS/MCM4/RAD21/ACTL6A/TOP2A/KPNA2/SFPQ/FEN1/PARP1/NUCKS1/SAMHD1/NONO/HMGB1/MCM3/FUS/UNG/MCM7/XRCC6/XRCC5/RPA2/MCM5/MORF4L1/HMCES/HMGB2/MORF4L2/MAGEF1/HSPD1/ALYREF/ACTB/RMI2/TFRC/KDM1A/APEX1/KLHDC3/BATF/HMGB3/TGFB1/PPP4C/TOP2B	47
BP	GO:1903039	positive regulation of leukocyte cell-cell adhesion	41/1406	275/18903	1.51076e-05	0.000267588	0.000193772	YES1/ACTL6A/ARID1A/ABL1/PTPN11/IRAK1/HMGB1/SMARCC1/CD47/SLC7A1/ZBTB7B/B2M/RHOA/EFNB2/HSPH1/NCK2/CD276/HLA-E/HSPD1/ACTB/TFRC/HLA-A/SMARCB1/HLA-DRA/SOX4/ST3GAL4/HLA-DPA1/CD74/CCR7/MDK/CD44/HLA-DQA1/CAV1/HLA-DQA2/IGF2/HLA-DMA/HLA-DRB1/HLA-DPB1/ANXA1/EFNB1/HLA-DQB1	41
BP	GO:0050673	epithelial cell proliferation	62/1406	481/18903	1.51193e-05	0.000267588	0.000193772	NRAS/PRKDC/STAT3/STAT1/PYGO2/TINF2/HMGB1/CDKN1B/CTNNB1/LAMC1/NCSTN/HMGB2/B2M/EFNB2/HMGN1/HIF1A/CDKN2B/CDC42/EHF/B4GALT1/CDH3/BAK1/FERMT1/TNFAIP3/TP63/CAV2/ZFP36L1/JAG1/CDK4/RTN4/PHB2/SOX9/EGFR/LAMB1/F3/MAGED1/MDK/CLDN1/SPINK1/GLUL/SERPINB1/MMP14/SOX2/MYC/JUN/CAV1/SNAI2/TBX2/BCL2L1/IGF2/MMP12/IGFBP4/SERPINB5/SRSF6/THBS1/GRN/TGFB1/IRF6/IGFBP3/ERRFI1/ID1/AREG	62
BP	GO:0035304	regulation of protein dephosphorylation	20/1406	94/18903	1.54742e-05	0.000272201	0.000197112	PPP1R8/PTBP1/PPP2R5D/ARPP19/CALM3/PPP1R11/HSP90B1/GNA12/CALM2/PPP6R1/PPP1R9B/YWHAE/HSP90AB1/YWHAB/CALM1/ENSA/GNAI2/PPIA/FKBP1A/TGFB1	20
BP	GO:0008631	intrinsic apoptotic signaling pathway in response to oxidative stress	13/1406	45/18903	1.54835e-05	0.000272201	0.000197112	UBQLN1/MELK/SFPQ/PARP1/NONO/MCL1/NFE2L2/HIF1A/ZNF622/SOD2/HSPB1/PPIA/P4HB	13
BP	GO:1902253	regulation of intrinsic apoptotic signaling pathway by p53 class mediator	11/1406	33/18903	1.55219e-05	0.000272201	0.000197112	HNRNPK/TP53/KDM1A/CD74/PTTG1IP/CD44/EIF5A/MYC/RPL11/ZNF385A/RPL26	11
BP	GO:0001667	ameboidal-type cell migration	63/1406	492/18903	1.59221e-05	0.00027837	0.00020158	PIP5K1A/RIC8A/ANLN/IQGAP1/ABL1/GNA13/PTPN11/ARF6/MAP4K4/RCC2/HMGB1/ITGB1/WASF2/GNA12/CORO1C/RIN2/ADIPOR1/RHOA/MTA2/EFNB2/NFE2L2/MYH9/CALR/HIF1A/CDC42/PLEC/PFN2/ITGA2/AAMP/FERMT1/MET/ADAM9/RAC1/ITGB4/RTN4/ITGA3/SOX9/HSPB1/CAP1/S100P/PLK2/FN1/GLUL/C1QBP/CTSH/JUN/GPI/GADD45A/SNAI2/FSTL1/THBS1/PFN1/GRN/TGFB1/ANXA1/CXCL13/ID1/SLC9A3R1/GJA1/EFNA1/JUP/EFNB1/CIB1	63
BP	GO:0046939	nucleotide phosphorylation	21/1406	102/18903	1.63097e-05	0.000284282	0.000205861	STAT3/OGDH/CMPK1/PGM1/APP/HIF1A/PGK1/LDHA/GIT1/ENO1/TPI1/PFKP/PGAM1/HK1/NME3/ENO2/GPI/PKM/FBP1/EIF6/GAPDH	21
BP	GO:0006338	chromatin remodeling	51/1406	373/18903	1.75359e-05	0.000304732	0.000220669	HCFC1/BAZ1B/DEK/SUPT16H/DNMT1/TOP1/CTCF/CHD4/MCM2/DAXX/SSRP1/HNRNPC/ACTL6A/POLE3/KDM5C/ARID1A/BRD2/LMNB1/DDX21/SET/TPR/LMNB2/HP1BP3/CBX3/ANP32E/RBBP7/JARID2/HMGB1/SMARCA5/RBBP4/NASP/SMARCC1/SF3B1/NAP1L4/CDK2/ANP32B/ASF1B/HDAC1/HMGB2/MTA2/TRIM28/ACTB/KDM1A/TP63/HMGA1/SMARCB1/CENPW/NPM1/SOX9/MYC/LMNA	51
BP	GO:0009199	ribonucleoside triphosphate metabolic process	38/1406	249/18903	1.79558e-05	0.000311089	0.000225273	STAT3/HSPA8/VCP/ATP6V1A/PARP1/OGDH/RAN/PGM1/APP/RHOA/STOML2/CTPS1/HIF1A/PGK1/LDHA/GIT1/ENO1/TPI1/AK3/PFKP/PGAM1/NT5E/ATP1B1/HK1/NME3/NDUFB10/TSPO/NDUFA1/IMPDH1/ENO2/GPI/PKM/NDUFB7/FBP1/EIF6/TGFB1/NDUFS2/GAPDH	38
BP	GO:0001666	response to hypoxia	43/1406	296/18903	1.8138e-05	0.000313303	0.000226876	UBQLN1/CCNA2/HP1BP3/ALKBH5/IRAK1/HYOU1/PMAIP1/CDKN1B/HSP90B1/ADAM15/RHOA/CAPN2/E2F1/NFE2L2/ACTN4/HIF1A/PGK1/ENO1/TM9SF4/TP53/TFRC/PLOD2/ITGA2/AHCY/ZFP36L1/TMBIM6/CHCHD2/ATP1B1/SOD2/PHB2/CYBB/AGTRAP/PLOD1/MMP14/PLAU/MYC/CAV1/P4HB/THBS1/EGR1/JUND/NDRG1/LMNA	43
BP	GO:0032465	regulation of cytokinesis	20/1406	95/18903	1.82478e-05	0.000314255	0.000227565	ECT2/RACGAP1/NUP62/PRC1/PLK1/CDCA8/AURKA/KIF20A/CALM3/CALM2/BIRC5/CDC25B/RHOA/AURKB/GIT1/CDC42/CALM1/POLDIP2/PLK2/BCL2L1	20
BP	GO:0032103	positive regulation of response to external stimulus	60/1406	464/18903	1.87604e-05	0.000322118	0.000233259	DHX9/PAK2/PRKDC/PARP9/WNK1/PLSCR1/SFPQ/AKIRIN1/LSM14A/NONO/PUM2/HMGB1/DDX60/IFI16/CD47/XRCC6/XRCC5/APP/HMGB2/HSP90AA1/LAMP1/OSMR/CALR/OPTN/HLA-E/CREB3/TNIP1/RIOK3/ITGA2/MGST2/IRF7/MET/HLA-F/RAC1/AIM2/CXCL10/CTSC/HSPB1/CD74/IFI35/CCR7/F3/MDK/ABCC1/RAC2/NKG7/CSF1R/PLAU/C1QBP/FLNA/RPS19/MMP12/THBS1/NFKBIA/GRN/TNFRSF1A/TGFB1/CXCL13/THBD/IDO1	60
BP	GO:0030032	lamellipodium assembly	17/1406	73/18903	1.91853e-05	0.000327253	0.000236977	ACTR2/ACTR3/AKIRIN1/ITGB1/GOLPH3/WASF2/HSP90AA1/NCK2/TWF1/CDC42/RAC1/ARPC2/RAC2/FSCN1/CAPZB/RHOD/BRK1	17
BP	GO:0001704	formation of primary germ layer	24/1406	127/18903	1.9209e-05	0.000327253	0.000236977	GRB2/EXT2/ITGB1/PRKAR1A/CTNNB1/ITGAV/ITGA2/PAF1/LAMA3/ETS2/ITGB4/ITGA3/LAMB3/LAMB1/FN1/ITGB5/MMP14/SOX2/GPI/TXNRD1/COL12A1/COL7A1/COL5A2/GJA1	24
BP	GO:0043903	regulation of biological process involved in symbiotic interaction	15/1406	59/18903	1.92301e-05	0.000327253	0.000236977	TRIM26/TRIM21/HMGB1/TRIM22/ITGAV/IFITM1/SNX3/CD74/IFITM3/FURIN/CAV1/P4HB/KRT6A/HLA-DRB1/LY6E	15
BP	GO:0000082	G1/S transition of mitotic cell cycle	38/1406	250/18903	1.96876e-05	0.000334051	0.0002419	PSME3/EIF4G1/PRKDC/TFDP1/RRM1/KHDRBS1/CTDSP2/ACTL6A/ARID1A/DDX3X/CUL1/ITGB1/PPP2CA/NASP/CDKN1B/SMARCC1/CDK2/RPA2/E2F4/RRM2/E2F1/GSPT1/CDKN2A/CDKN2B/ACTB/TP53/APEX1/PSME1/SMARCB1/RCC1/CDK4/EGFR/PLK2/PSME2/MYC/ANXA1/RPL26/RPS6	38
BP	GO:0019081	viral translation	8/1406	18/18903	2.04366e-05	0.000344725	0.00024963	DHX9/PTBP1/DENR/CSDE1/EIF3A/EIF3B/PCBP2/EIF3L	8
BP	GO:1904872	regulation of telomerase RNA localization to Cajal body	8/1406	18/18903	2.04366e-05	0.000344725	0.00024963	DKC1/CCT5/CCT3/TCP1/CCT6A/CCT8/CCT4/CCT7	8
BP	GO:1901673	regulation of mitotic spindle assembly	9/1406	23/18903	2.13006e-05	0.000358248	0.000259422	HNRNPU/PLK1/TPR/CHMP5/CHMP1B/DRG1/CHMP2B/CHMP1A/CHMP2A	9
BP	GO:0009112	nucleobase metabolic process	11/1406	34/18903	2.14099e-05	0.000359037	0.000259994	PRPS1/TYMS/CMPK1/PAICS/CTPS1/HPRT1/KDM1A/TYMP/SHMT2/CDA/APRT	11
BP	GO:0033120	positive regulation of RNA splicing	12/1406	40/18903	2.15235e-05	0.000359645	0.000260434	THRAP3/SNW1/PRMT5/RBMX/HSPA8/U2AF2/POLR2A/PRPF19/SF3B4/NCL/PRDX6/SLC38A2	12
BP	GO:0050870	positive regulation of T cell activation	38/1406	251/18903	2.15712e-05	0.000359645	0.000260434	YES1/ACTL6A/ARID1A/ABL1/PTPN11/HMGB1/SMARCC1/CD47/SLC7A1/ZBTB7B/B2M/RHOA/EFNB2/HSPH1/NCK2/CD276/HLA-E/HSPD1/ACTB/TFRC/HLA-A/SMARCB1/HLA-DRA/SOX4/HLA-DPA1/CD74/CCR7/MDK/HLA-DQA1/CAV1/HLA-DQA2/IGF2/HLA-DMA/HLA-DRB1/HLA-DPB1/ANXA1/EFNB1/HLA-DQB1	38
BP	GO:0009205	purine ribonucleoside triphosphate metabolic process	37/1406	242/18903	2.20874e-05	0.000366601	0.000265471	STAT3/HSPA8/VCP/ATP6V1A/PARP1/OGDH/RAN/PGM1/APP/RHOA/STOML2/HIF1A/PGK1/LDHA/GIT1/ENO1/TPI1/AK3/PFKP/PGAM1/NT5E/ATP1B1/HK1/NME3/NDUFB10/TSPO/NDUFA1/IMPDH1/ENO2/GPI/PKM/NDUFB7/FBP1/EIF6/TGFB1/NDUFS2/GAPDH	37
BP	GO:0070482	response to oxygen levels	47/1406	337/18903	2.22077e-05	0.000366601	0.000265471	UBQLN1/CCNA2/HP1BP3/ALKBH5/ATP6V1A/IRAK1/HYOU1/PMAIP1/CDKN1B/HSP90B1/ADAM15/RHOA/CAPN2/E2F1/NFE2L2/ACTN4/HIF1A/PGK1/ENO1/TM9SF4/TP53/TFRC/SLC7A5/PLOD2/ITGA2/AHCY/ZFP36L1/TMBIM6/CHCHD2/ATP1B1/SOD2/PHB2/CYBB/AGTRAP/PLOD1/MMP14/PLAU/MYC/CAV1/ATP6V1G1/P4HB/THBS1/EGR1/JUND/NDUFS2/NDRG1/LMNA	47
BP	GO:0009135	purine nucleoside diphosphate metabolic process	21/1406	104/18903	2.22433e-05	0.000366601	0.000265471	STAT3/OGDH/PGM1/APP/HIF1A/PGK1/LDHA/GIT1/ENO1/TPI1/AK3/PFKP/PGAM1/NT5E/HK1/ENO2/GPI/PKM/FBP1/EIF6/GAPDH	21
BP	GO:0009179	purine ribonucleoside diphosphate metabolic process	21/1406	104/18903	2.22433e-05	0.000366601	0.000265471	STAT3/OGDH/PGM1/APP/HIF1A/PGK1/LDHA/GIT1/ENO1/TPI1/AK3/PFKP/PGAM1/NT5E/HK1/ENO2/GPI/PKM/FBP1/EIF6/GAPDH	21
BP	GO:0045445	myoblast differentiation	22/1406	112/18903	2.2547e-05	0.000370544	0.000268327	NRAS/ACTL6A/ARID1A/AKIRIN1/ITGB1/SMARCC1/PLEC/DDX5/ACTB/LRRC8A/DDX17/CXCL9/ZFP36L1/SMARCB1/JAG1/SOX4/CXCL10/SOX9/TBX2/TGFB1/IGFBP3/PITX1	22
BP	GO:0048146	positive regulation of fibroblast proliferation	14/1406	53/18903	2.2686e-05	0.000371766	0.000269212	DHX9/CCNA2/ABL1/CCNB1/E2F1/S100A6/FOSL2/CDK4/CD74/EGFR/FN1/MYC/JUN/BRK1	14
BP	GO:0006998	nuclear envelope organization	15/1406	60/18903	2.38931e-05	0.000388508	0.000281335	DCTN1/PLK1/LMNB1/LMNB2/CHMP5/CHMP1B/CTDNEP1/CHMP2B/TMEM43/CHMP1A/RCC1/SUN2/ZMPSTE24/LMNA/CHMP2A	15
BP	GO:0031638	zymogen activation	16/1406	67/18903	2.39713e-05	0.000388508	0.000281335	IFI16/PGK1/ENO1/BAK1/CTSZ/PERP/DHCR24/FURIN/MMP14/PLAU/CTSH/ANXA2/THBS1/C1R/CTSL/THBD	16
BP	GO:0032206	positive regulation of telomere maintenance	16/1406	67/18903	2.39713e-05	0.000388508	0.000281335	HNRNPA2B1/ACTL6A/TINF2/DKC1/CCT5/CCT3/CTNNB1/TCP1/XRCC5/HNRNPD/CCT6A/AURKB/CCT8/CCT4/CCT7/HNRNPA1	16
BP	GO:0001933	negative regulation of protein phosphorylation	47/1406	338/18903	2.39778e-05	0.000388508	0.000281335	ADAR/PAK2/NUP62/IPO5/SNX6/EIF4G1/PRKDC/PARP14/PLK1/CTDSP2/IPO7/YWHAG/DNAJA1/PTPN1/ABL1/PRKAR1A/PPP2CA/CDKN1B/CALM3/CORO1C/CALM2/TAF7/TMED2/NCK2/CDKN2A/CDKN2B/PLEC/BAK1/TNFAIP3/PRNP/PPP2R1A/CALM1/CADM4/NPM1/HSPB1/CRKL/SPINK1/PPIA/JUN/CAV1/PMEPA1/GADD45A/TGFB1/IGFBP3/ERRFI1/UCHL1/CIB1	47
BP	GO:0008360	regulation of cell shape	27/1406	154/18903	2.46615e-05	0.000398463	0.000288543	DIAPH1/GNA13/CDC42SE1/PLXNA1/GNA12/RHOA/MYH9/MSN/MYL12A/CDC42EP4/RAC1/CDC42EP5/DAG1/ZMPSTE24/WDR1/FN1/RAC2/CSF1R/RHOG/PLXNB2/RHOC/RHOD/MYL12B/ANXA1/CDC42EP1/SLC9A3R1/EZR	27
BP	GO:0032479	regulation of type I interferon production	21/1406	105/18903	2.58827e-05	0.00041557	0.000300932	DHX9/OAS3/STAT1/DDX3X/PTPN11/IFIH1/TRIM21/OAS2/IRAK1/RNF26/IRF1/HMGB2/HSP90AA1/MYD88/HSPD1/RIOK3/IRF7/OAS1/FLOT1/MMP12/GAPDH	21
BP	GO:0032606	type I interferon production	21/1406	105/18903	2.58827e-05	0.00041557	0.000300932	DHX9/OAS3/STAT1/DDX3X/PTPN11/IFIH1/TRIM21/OAS2/IRAK1/RNF26/IRF1/HMGB2/HSP90AA1/MYD88/HSPD1/RIOK3/IRF7/OAS1/FLOT1/MMP12/GAPDH	21
BP	GO:0051972	regulation of telomerase activity	13/1406	47/18903	2.5937e-05	0.00041557	0.000300932	HNRNPA2B1/DKC1/PTGES3/CTNNB1/TCP1/XRCC5/HNRNPD/HSP90AA1/AURKB/CCT4/HSP90AB1/TP53/MYC	13
BP	GO:0042063	gliogenesis	44/1406	310/18903	2.60587e-05	0.00041636	0.000301504	STAT3/PRMT5/ABL1/PTPN11/CNP/CERS2/CDK1/PRPF19/CTNNB1/APP/HDAC1/NCSTN/PPP1CC/RHOA/B4GALT5/E2F1/CDKN2B/PLEC/TP53/SLC7A5/IFNGR1/SOX4/ITGB4/DAG1/RTN4/WDR1/TSPO/SOX9/LAMB1/MDK/CRKL/MMP14/CSF1R/SOX2/ANO1/MAL/GRN/TGFB1/NDUFS2/ANXA1/NDRG1/GPC1/AREG/CD9	44
BP	GO:0051231	spindle elongation	7/1406	14/18903	2.67168e-05	0.000425692	0.000308261	RACGAP1/PRC1/KIF11/CDCA8/BIRC5/AURKB/PPP2R1A	7
BP	GO:0019076	viral release from host cell	10/1406	29/18903	2.70832e-05	0.000428125	0.000310023	DDB1/CHMP5/RAB7A/CHMP1B/ARL8B/CHMP2B/CAV2/CHMP1A/PPIA/CHMP2A	10
BP	GO:0035891	exit from host cell	10/1406	29/18903	2.70832e-05	0.000428125	0.000310023	DDB1/CHMP5/RAB7A/CHMP1B/ARL8B/CHMP2B/CAV2/CHMP1A/PPIA/CHMP2A	10
BP	GO:0002934	desmosome organization	6/1406	10/18903	2.70971e-05	0.000428125	0.000310023	DSG2/DSP/PKP3/PERP/SNAI2/JUP	6
BP	GO:2000116	regulation of cysteine-type endopeptidase activity	36/1406	235/18903	2.71672e-05	0.000428125	0.000310023	PAK2/DDX3X/CSNK2A1/VCP/INTS1/HMGB1/PMAIP1/IFI16/ANP32B/BIRC5/MTCH1/RHOA/TNFSF10/HSPD1/PSMB9/BAK1/ARL6IP1/TP63/PRDX3/IFI6/AIM2/RAF1/MAGEA3/PDCD5/PERP/CAST/F3/CD44/DHCR24/SOX2/MYC/CTSH/GPI/THBS1/LAPTM5/CST3	36
BP	GO:0016052	carbohydrate catabolic process	27/1406	155/18903	2.77835e-05	0.000436641	0.00031619	STAT3/OGDH/PGM1/APP/HIF1A/PGK1/LDHA/GIT1/SCARB2/PGM2/ENO1/TPI1/TP53/PFKP/PGAM1/HK1/GUSB/PYGB/PPP1CA/ENO2/GPI/PKM/GM2A/FBP1/PYGL/EIF6/GAPDH	27
BP	GO:0072595	maintenance of protein localization in organelle	12/1406	41/18903	2.83829e-05	0.000444846	0.000322132	HNRNPU/CIZ1/HSPA5/RANGAP1/KDELR2/HK1/OS9/SUN2/GPAA1/TSPO/CHCHD10/KDELR1	12
BP	GO:0050685	positive regulation of mRNA processing	11/1406	35/18903	2.91345e-05	0.000455386	0.000329764	THRAP3/SNW1/PRMT5/NUDT21/RBMX/HSPA8/PRPF19/SF3B4/NCL/PAF1/PRDX6	11
BP	GO:0048255	mRNA stabilization	15/1406	61/18903	2.95264e-05	0.000459015	0.000332392	THRAP3/DHX9/HNRNPU/LARP1/HNRNPC/PAIP1/SYNCRIP/CSDE1/IGF2BP2/FUS/MAPKAPK2/HNRNPD/E2F1/MYD88/YBX3	15
BP	GO:1900024	regulation of substrate adhesion-dependent cell spreading	15/1406	61/18903	2.95264e-05	0.000459015	0.000332392	ABL1/RCC2/GBP1/CORO1C/CALR/ACTN4/CDC42/RAC1/ARPC2/MDK/CRKL/C1QBP/FLNA/P4HB/CIB1	15
BP	GO:0008154	actin polymerization or depolymerization	32/1406	200/18903	3.12439e-05	0.00048244	0.000349355	DIAPH1/MTPN/HAX1/CAPZA1/ABL1/GRB2/SPTAN1/ARF6/FLII/SPTBN1/RHOA/PPP1R9B/ARPC1A/NCK2/TWF1/PFN2/LIMA1/CDC42EP4/RAC1/DBN1/CDC42EP5/WDR1/ARPC2/CCR7/SSH3/ARPC1B/CFL1/CAPZB/PFN1/CDC42EP1/COTL1/BRK1	32
BP	GO:0043393	regulation of protein binding	32/1406	200/18903	3.12439e-05	0.00048244	0.000349355	DTX3L/PLK1/ADNP/AURKA/ABL1/SNAPIN/TRIM21/MAPRE1/ATP2A2/PPP2CA/RALB/RAN/APP/ADAM15/PTPRF/B2M/AURKB/CDC42/HSP90AB1/ACTB/KDM1A/TMBIM6/IFIT1/CTSZ/POLDIP2/PPP1CA/CAV1/ANXA2/FKBP1A/FLOT1/RPL11/ID1	32
BP	GO:0022409	positive regulation of cell-cell adhesion	45/1406	322/18903	3.12848e-05	0.00048244	0.000349355	YES1/ACTL6A/ARID1A/ABL1/PTPN11/JAK1/IRAK1/HMGB1/SMARCC1/CD47/SLC7A1/ZBTB7B/B2M/RHOA/EFNB2/HSPH1/NCK2/CD276/HLA-E/HSPD1/ACTB/TFRC/HLA-A/SMARCB1/HLA-DRA/SOX4/ST3GAL4/HLA-DPA1/CD74/CCR7/MDK/CD44/HLA-DQA1/SOX2/CAV1/HLA-DQA2/IGF2/HLA-DMA/FLOT1/HLA-DRB1/HLA-DPB1/ANXA1/CXCL13/EFNB1/HLA-DQB1	45
BP	GO:0018279	protein N-linked glycosylation via asparagine	9/1406	24/18903	3.1836e-05	0.000489627	0.00035456	MAGT1/RPN1/RPN2/DDOST/DPM1/STT3B/OSTC/DAD1/OST4	9
BP	GO:0051235	maintenance of location	47/1406	342/18903	3.24337e-05	0.00049749	0.000360253	HNRNPU/DIAPH1/ITPR3/G3BP2/CIZ1/ABL1/PSMD10/LMAN1/HSPA5/GOLPH3/CALM3/RNF213/HSP90B1/SREBF2/CALM2/CALR/PLIN3/ITGAV/TWF1/RANGAP1/SMIM22/YWHAB/KDELR2/CXCL9/DBN1/HK1/OS9/SUN2/ALKBH7/CALM1/CXCL10/GPAA1/TSPO/CCR7/CHCHD10/SQLE/FLNA/CAV1/CXCL11/SRGN/FKBP1A/GM2A/KDELR1/NFKBIA/PLIN2/ANXA1/FTH1	47
BP	GO:0045861	negative regulation of proteolysis	48/1406	352/18903	3.28441e-05	0.000499492	0.000361703	PAK2/USP14/UBE2Z/DDX3X/CSNK2A1/INTS1/TRIM21/SNX12/PICALM/TMED10/IFI16/SMARCC1/BAG6/APP/BIRC5/SDCBP/USP7/PTTG1/HSP90AB1/TP53/ARL6IP1/PRDX3/PRNP/IFI6/RAF1/MAGEA3/CTSZ/CAST/SERPING1/CD44/SPINK1/SERPINB1/DHCR24/FURIN/BST2/PLAU/GPI/APLP2/ANXA2/COL7A1/SERPINH1/SERPINB5/THBS1/RPL11/CTSB/EFNA1/GAPDH/CST3	48
BP	GO:0090670	RNA localization to Cajal body	8/1406	19/18903	3.29984e-05	0.000499492	0.000361703	DKC1/CCT5/CCT3/TCP1/CCT6A/CCT8/CCT4/CCT7	8
BP	GO:0090671	telomerase RNA localization to Cajal body	8/1406	19/18903	3.29984e-05	0.000499492	0.000361703	DKC1/CCT5/CCT3/TCP1/CCT6A/CCT8/CCT4/CCT7	8
BP	GO:0090672	telomerase RNA localization	8/1406	19/18903	3.29984e-05	0.000499492	0.000361703	DKC1/CCT5/CCT3/TCP1/CCT6A/CCT8/CCT4/CCT7	8
BP	GO:0090685	RNA localization to nucleus	8/1406	19/18903	3.29984e-05	0.000499492	0.000361703	DKC1/CCT5/CCT3/TCP1/CCT6A/CCT8/CCT4/CCT7	8
BP	GO:0031099	regeneration	31/1406	192/18903	3.45011e-05	0.000520868	0.000377182	MTPN/PRMT5/CCNA2/AURKA/AKIRIN1/CERS2/PTPN12/PCNA/CDK1/TYMS/CDKN1B/PRPS2/CTNNA1/PTGFRN/ADAM15/PTPRF/LCP1/SLC7A5/BAK1/AXL/DAG1/TSPO/TNC/MDK/CLDN1/SOX2/FLNA/JUN/GRN/ANXA1/CD9	31
BP	GO:0006261	DNA-templated DNA replication	28/1406	166/18903	3.6449e-05	0.000548834	0.000397434	MCM6/DDX23/CHTF8/RRM1/RPA1/MCM2/TIMELESS/MCM4/POLE3/CIZ1/DDX21/FEN1/PARP1/NUCKS1/SAMHD1/MCM3/PCNA/RFC2/MCM7/RFC4/CDK2/MCM5/POLD2/STOML2/ALYREF/CDK2AP1/HMGA1/ZMPSTE24	28
BP	GO:0006898	receptor-mediated endocytosis	38/1406	257/18903	3.67838e-05	0.000552429	0.000400037	HNRNPK/M6PR/CANX/GRB2/AP2B1/ARF6/UBQLN2/ITGB1/CLTC/PICALM/RALA/RALB/PI4KB/B2M/SDCBP/EFNB2/ITGAV/SCARB2/MICALL1/SNX17/ARF1/TFRC/AP2M1/PPT1/CAV2/RAC1/RAB31/CXCL16/CAP1/CD63/CAV1/ANXA2/CLTA/FLOT1/CTSL/FCER1G/EZR/CD9	38
BP	GO:0010506	regulation of autophagy	47/1406	344/18903	3.76171e-05	0.000563473	0.000408034	DCAF12/UBQLN1/SNX6/EIF4G1/STAT3/LARP1/UBQLN4/HAX1/EIF4G2/SPTLC1/MTDH/ABL1/ATP6V1A/TRIM21/UBQLN2/HMGB1/VPS26A/SLC25A5/RALB/IFI16/SUPT5H/TRIM22/PIP4K2C/MCL1/SREBF2/RRAGA/OPTN/HIF1A/TP53/SLC7A5/MET/BAG3/MAGEA3/ZMPSTE24/POLDIP2/TSPO/RNF5/HSPB1/PLK2/PSAP/CAPN1/ATP6V1G1/PLEKHF1/UCHL1/GAPDH/EEF1A1/HSPB8	47
BP	GO:0001778	plasma membrane repair	10/1406	30/18903	3.79275e-05	0.000563719	0.000408212	CHMP5/CHMP1B/MYH9/ARL8B/CHMP2B/CHMP1A/AHNAK/MYOF/ANXA2/CHMP2A	10
BP	GO:0071480	cellular response to gamma radiation	10/1406	30/18903	3.79275e-05	0.000563719	0.000408212	HSPA5/XRCC6/XRCC5/TMEM109/TP53/KDM1A/ZMPSTE24/BCL2L1/EGR1/RPL26	10
BP	GO:1901798	positive regulation of signal transduction by p53 class mediator	10/1406	30/18903	3.79275e-05	0.000563719	0.000408212	PMAIP1/RPS15/DDX5/RPS20/EIF5A/MYC/RPL37/RPL11/ZNF385A/RPL26	10
BP	GO:0097581	lamellipodium organization	19/1406	92/18903	3.88649e-05	0.000576162	0.000417223	ACTR2/ACTR3/AKIRIN1/ITGB1/GOLPH3/WASF2/CORO1C/HSP90AA1/NCK2/TWF1/CDC42/RAC1/ARPC2/RAC2/CD44/FSCN1/CAPZB/RHOD/BRK1	19
BP	GO:0034620	cellular response to unfolded protein	20/1406	100/18903	3.99772e-05	0.000588317	0.000426025	DAXX/HSPA8/PTPN1/VCP/HSPA5/ATF6B/TMED2/NFE2L2/OPTN/NCK2/HSPA9/CREB3/HSPD1/TM7SF3/BAK1/TMBIM6/BAG3/OS9/ERMP1/HSPB8	20
BP	GO:0071214	cellular response to abiotic stimulus	46/1406	335/18903	3.99916e-05	0.000588317	0.000426025	ECT2/NMT1/MTPN/DDB1/DDX3X/GRB2/PARP1/NUCKS1/CAB39/HSPA5/PCNA/IFI16/XRCC6/XRCC5/IRF1/AURKB/CALR/MYD88/PLEC/TMEM109/TP53/KDM1A/BAK1/ITGA2/ZFP36L1/YBX3/BAG3/TNKS1BP1/DAG1/ZMPSTE24/NPM1/TSPO/SOX9/NET1/ITGB6/MYC/GADD45A/SNAI2/BCL2L1/CNN2/FBP1/EGR1/SLC38A2/TNFRSF1A/ERRFI1/RPL26	46
BP	GO:0104004	cellular response to environmental stimulus	46/1406	335/18903	3.99916e-05	0.000588317	0.000426025	ECT2/NMT1/MTPN/DDB1/DDX3X/GRB2/PARP1/NUCKS1/CAB39/HSPA5/PCNA/IFI16/XRCC6/XRCC5/IRF1/AURKB/CALR/MYD88/PLEC/TMEM109/TP53/KDM1A/BAK1/ITGA2/ZFP36L1/YBX3/BAG3/TNKS1BP1/DAG1/ZMPSTE24/NPM1/TSPO/SOX9/NET1/ITGB6/MYC/GADD45A/SNAI2/BCL2L1/CNN2/FBP1/EGR1/SLC38A2/TNFRSF1A/ERRFI1/RPL26	46
BP	GO:1902905	positive regulation of supramolecular fiber organization	29/1406	176/18903	4.16449e-05	0.000611075	0.000442505	CKAP5/DCTN1/ABL1/GRB2/ARF6/MAPRE1/WASF2/COLGALT1/CDKN1B/CD47/APP/RHOA/NCK2/GIT1/CDC42/PFN2/DRG1/CDC42EP4/MET/RAC1/CDC42EP5/WDR1/ARPC2/CCR7/RHOC/PFN1/CDC42EP1/ID1/BRK1	29
BP	GO:0035303	regulation of dephosphorylation	24/1406	133/18903	4.22434e-05	0.000617882	0.000447434	PPP1R8/PTBP1/SMG5/IQGAP1/PPP2R5D/ARPP19/CALM3/PPP1R11/HSP90B1/GNA12/CALM2/PPP6R1/PPP1R9B/YWHAE/HSP90AB1/URI1/YWHAB/ITGA2/CALM1/ENSA/GNAI2/PPIA/FKBP1A/TGFB1	24
BP	GO:0010952	positive regulation of peptidase activity	31/1406	194/18903	4.23236e-05	0.000617882	0.000447434	PSME3/STAT3/DDX3X/VCP/HMGB1/APH1A/PMAIP1/PICALM/IFI16/APP/ANP32B/NCSTN/MTCH1/RHOA/TNFSF10/HSPD1/BAK1/PSME1/AIM2/PDCD5/PERP/F3/FN1/PSME2/ADRM1/MYC/CTSH/CAV1/GRN/LAPTM5/EFNA1	31
BP	GO:0110053	regulation of actin filament organization	40/1406	278/18903	4.36823e-05	0.000636103	0.000460629	PAK2/MTPN/HAX1/CAPZA1/ABL1/GRB2/SPTAN1/ARF6/WASF2/FLII/CD47/SPTBN1/RHOA/ARPC1A/NCK2/TWF1/CDC42/STMN1/PFN2/LIMA1/ACTG1/ARF1/CDC42EP4/MET/RAC1/DBN1/CDC42EP5/WDR1/ARPC2/CCR7/SSH3/ARPC1B/FLNA/RHOC/CAPZB/PFN1/CDC42EP1/COTL1/ID1/BRK1	40
BP	GO:0008064	regulation of actin polymerization or depolymerization	27/1406	159/18903	4.41695e-05	0.000641572	0.000464589	MTPN/HAX1/CAPZA1/GRB2/SPTAN1/ARF6/FLII/SPTBN1/RHOA/ARPC1A/NCK2/TWF1/PFN2/LIMA1/CDC42EP4/DBN1/CDC42EP5/WDR1/ARPC2/CCR7/SSH3/ARPC1B/CAPZB/PFN1/CDC42EP1/COTL1/BRK1	27
BP	GO:0016236	macroautophagy	44/1406	317/18903	4.49981e-05	0.000651962	0.000472113	HUWE1/UBQLN1/SNX6/LARP1/UBQLN4/SPTLC1/MFN2/LAMP2/VCP/SNAPIN/ATP6V1A/CHMP5/UBQLN2/ATP2A2/VPS26A/SLC25A5/PGAM5/RALB/RAB7A/SUPT5H/PIP4K2C/RNF213/RAB1A/CHMP1B/OPTN/HIF1A/RAB1B/TP53/ARL8B/WDR45B/CHMP2B/CHMP1A/BAG3/CALM1/POLDIP2/PHB2/RNF5/CAPN1/ATP6V1G1/SQSTM1/UCHL1/GAPDH/HSPB8/CHMP2A	44
BP	GO:0016485	protein processing	37/1406	250/18903	4.53521e-05	0.000655441	0.000474632	YME1L1/METAP2/PARP1/SNX12/APH1A/IFI16/ECE1/NCSTN/CAPN2/ATP6AP2/STOML2/CTSS/MYH9/PGK1/MAFB/ENO1/BAK1/PRNP/MAGEA3/CTSZ/ZMPSTE24/PERP/CAST/CPE/F3/DHCR24/FURIN/MMP14/PLAU/CTSH/ANXA2/SRGN/THBS1/C1R/CTSL/THBD/CTSE	37
BP	GO:0032508	DNA duplex unwinding	19/1406	93/18903	4.54841e-05	0.0006557	0.00047482	DHX9/MCM6/CHTF8/CHD4/RPA1/MCM2/MCM4/TOP2A/DDX3X/MCM3/DDX1/RFC2/MCM7/RFC4/XRCC6/XRCC5/MCM5/HMGA1/ANXA1	19
BP	GO:1902806	regulation of cell cycle G1/S phase transition	33/1406	213/18903	4.5947e-05	0.000660718	0.000478453	PSME3/EIF4G1/PRKDC/TFDP1/RRM1/CTDSP2/ACTL6A/ARID1A/DDX3X/PPP2CA/CDKN1B/FAM83D/SMARCC1/CDK2/RPA2/RRM2/E2F1/CDKN2A/CDKN2B/ACTB/TP53/PAF1/APEX1/PSME1/SMARCB1/PHB2/EGFR/PLK2/PSME2/SOX2/TBX2/ANXA1/RPL26	33
BP	GO:0018196	peptidyl-asparagine modification	9/1406	25/18903	4.64698e-05	0.000666569	0.00048269	MAGT1/RPN1/RPN2/DDOST/DPM1/STT3B/OSTC/DAD1/OST4	9
BP	GO:0006271	DNA strand elongation involved in DNA replication	7/1406	15/18903	4.68736e-05	0.000669024	0.000484468	MCM4/POLE3/MCM3/PCNA/MCM7/RFC4/POLD2	7
BP	GO:0097212	lysosomal membrane organization	7/1406	15/18903	4.68736e-05	0.000669024	0.000484468	CHMP5/CHMP1B/LAPTM4B/CHMP2B/CHMP1A/LAPTM5/CHMP2A	7
BP	GO:0042274	ribosomal small subunit biogenesis	17/1406	78/18903	4.77468e-05	0.000679801	0.000492272	PRKDC/XRCC5/RPS28/RPS15/RIOK3/TSR2/ERAL1/RPS24/NPM1/RPL38/RPS8/RPS25/RPS14/RPS19/RPSA/RPS21/RPS6	17
BP	GO:0002683	negative regulation of immune system process	57/1406	449/18903	5.07636e-05	0.000720968	0.000522083	ADAR/OAS3/PARP14/YES1/YTHDF2/TRIM21/PARP1/SAMHD1/HMGB1/STAT2/PRKAR1A/GBP1/IFI16/CTNNB1/CD47/IRF1/ZBTB7B/HSPA9/TRAFD1/HLA-E/MAFB/HLA-B/TNFAIP3/HLA-A/HLA-F/TMBIM6/PRNP/PSMB4/OAS1/PLA2G2F/AXL/SOX9/CD74/HMGB3/AHR/SERPING1/PLK2/MDK/C1QC/FURIN/BST2/MYC/RPS19/SNAI2/CD59/CNN2/MMP12/THBS1/HLA-DRB1/VSIG4/GRN/TGFB1/ANXA1/LAPTM5/EZR/TMEM176B/IDO1	57
BP	GO:1901654	response to ketone	32/1406	205/18903	5.12751e-05	0.000723183	0.000523687	LARP1/GNB1/PARP1/GOLPH3/PCNA/TYMS/NASP/CALM3/NCOA4/ADAM15/HNRNPD/PPP1R9B/CALR/MSN/CDK4/TSPO/CYBB/CCR7/AHR/CLDN1/CDA/CAV1/GPI/BCL2L1/TXNIP/THBS1/FBP1/AKR1C2/GJB2/TGFB1/ERRFI1/RPL27	32
BP	GO:0044794	positive regulation by host of viral process	8/1406	20/18903	5.14156e-05	0.000723183	0.000523687	PAIP1/HSPA8/NUCKS1/CAV2/STOM/CSF1R/CFL1/EEF1A1	8
BP	GO:1902236	negative regulation of endoplasmic reticulum stress-induced intrinsic apoptotic signaling pathway	8/1406	20/18903	5.14156e-05	0.000723183	0.000523687	PTPN1/HYOU1/TXNDC12/CREB3/TMBIM6/MAGEA3/GRINA/BCL2L1	8
BP	GO:0036293	response to decreased oxygen levels	43/1406	309/18903	5.14225e-05	0.000723183	0.000523687	UBQLN1/CCNA2/HP1BP3/ALKBH5/IRAK1/HYOU1/PMAIP1/CDKN1B/HSP90B1/ADAM15/RHOA/CAPN2/E2F1/NFE2L2/ACTN4/HIF1A/PGK1/ENO1/TM9SF4/TP53/TFRC/PLOD2/ITGA2/AHCY/ZFP36L1/TMBIM6/CHCHD2/ATP1B1/SOD2/PHB2/CYBB/AGTRAP/PLOD1/MMP14/PLAU/MYC/CAV1/P4HB/THBS1/EGR1/JUND/NDRG1/LMNA	43
BP	GO:0007173	epidermal growth factor receptor signaling pathway	21/1406	110/18903	5.33626e-05	0.000748638	0.00054212	NUP62/SNX6/IQGAP1/ABL1/GRB2/PTPN11/PTPN12/RALA/RALB/RAB7A/NCK2/SHC1/SHKBP1/IFI6/SOX9/EGFR/EFEMP1/TGFB1/ERRFI1/FAM83A/AREG	21
BP	GO:0048545	response to steroid hormone	46/1406	339/18903	5.36722e-05	0.00075115	0.000543939	HNRNPU/CNOT1/DAXX/ARID1A/DNAJA1/HSPA8/RBBP7/PARP1/PTGES3/PCNA/ATP1A1/TYMS/CALM3/YWHAH/NCOA4/HDAC1/HMGB2/TAF7/RHOA/PPP1R9B/CALR/DDX5/URI1/KDM1A/DDX17/TP63/FKBP4/ZFP36L1/ADAM9/TSPO/PHB2/CYBB/MDK/CLDN1/ZFP36L2/CAV1/PMEPA1/GPI/TXNIP/THBS1/GJB2/TGFB1/ANXA1/ERRFI1/AREG/RPL27	46
BP	GO:0034329	cell junction assembly	55/1406	430/18903	5.56734e-05	0.000772222	0.000559198	ECT2/PAK2/EIF4G1/ADNP/PIP5K1A/CAPZA1/ABL1/PTPRA/ARF6/MAP4K4/RCC2/CTNNA1/CTNND1/CTNNB1/CLSTN1/LAMC1/TLN1/APP/CORO1C/SDCBP/RHOA/EFNB2/CDC42/PLEC/ACTB/ACTG1/ITGA6/ITGA2/ACTN1/LAMA3/COL17A1/MYO1C/RAC1/PKP3/ITGB4/POLDIP2/WDR1/FN1/FSCN1/CRKL/CLDN1/MMP14/CAV1/SNAI2/PLXNB2/RHOC/CDH1/PKP1/FLOT1/THBS1/GJB2/RHOD/GJA1/JUP/CD9	55
BP	GO:0034975	protein folding in endoplasmic reticulum	6/1406	11/18903	5.58491e-05	0.000772222	0.000559198	CANX/HSPA5/HSP90B1/CALR/PDIA3/P4HB	6
BP	GO:0039530	MDA-5 signaling pathway	6/1406	11/18903	5.58491e-05	0.000772222	0.000559198	OAS3/IFIH1/DDX60/RIOK3/IRF7/C1QBP	6
BP	GO:0051987	positive regulation of attachment of spindle microtubules to kinetochore	6/1406	11/18903	5.58491e-05	0.000772222	0.000559198	HNRNPU/CDCA8/RCC2/CCNB1/BIRC5/AURKB	6
BP	GO:0075522	IRES-dependent viral translational initiation	6/1406	11/18903	5.58491e-05	0.000772222	0.000559198	PTBP1/DENR/CSDE1/EIF3A/EIF3B/PCBP2	6
BP	GO:0050878	regulation of body fluid levels	51/1406	390/18903	5.78759e-05	0.000798326	0.000578101	WNK1/GNA13/PLSCR1/OAS2/EXT2/LMAN1/COPA/RAP2B/TLN1/GNA12/ZBTB7B/NFE2L2/MYH9/HIF1A/ANXA5/PLEC/STMN1/ACTB/AK3/ACTG1/MYL12A/ITGA2/FZD6/TP63/MET/AXL/CLIC1/DDR1/ST3GAL4/HSPB1/SERPING1/GNAI2/F3/FN1/CLDN1/SPINK1/PPIA/PLAU/KCNN4/FLNA/CAV1/ANO1/GPI/ANXA2/CD59/THBS1/APRT/ZNF385A/THBD/FCER1G/CD9	51
BP	GO:0097305	response to alcohol	37/1406	253/18903	5.87198e-05	0.00080803	0.000585128	ACTR2/EIF4G1/LARP1/GNB1/PARP1/GOLPH3/OXCT1/CDK1/TYMS/CALM3/CTNNA1/CTNNB1/ADAM15/HNRNPD/RHOA/PPP1R9B/MYD88/BAK1/CDK4/DAG1/TSPO/SOD2/CYBB/CCR7/AHR/CLDN1/SPINK1/CDA/BCL2L1/CDH1/TUFM/FBP1/AKR1C2/TGFB1/JUP/RPL15/RPL27	37
BP	GO:0031532	actin cytoskeleton reorganization	21/1406	111/18903	6.12718e-05	0.000841135	0.000609101	ATP2C1/CDC42BPB/PIP5K1A/HAX1/PTPN1/ABL1/GRB2/RALA/RHOA/MYH9/SHC1/CDC42/PLEC/PTK7/ARHGDIA/MDK/CSF1R/FLNA/PLEK2/ANXA1/EZR	21
BP	GO:1903573	negative regulation of response to endoplasmic reticulum stress	12/1406	44/18903	6.15131e-05	0.000842436	0.000610043	USP14/PTPN1/HSPA5/HYOU1/TXNDC12/ATF6B/NCK2/CREB3/TMBIM6/MAGEA3/GRINA/BCL2L1	12
BP	GO:0030832	regulation of actin filament length	27/1406	162/18903	6.17053e-05	0.000843061	0.000610496	MTPN/HAX1/CAPZA1/GRB2/SPTAN1/ARF6/FLII/SPTBN1/RHOA/ARPC1A/NCK2/TWF1/PFN2/LIMA1/CDC42EP4/DBN1/CDC42EP5/WDR1/ARPC2/CCR7/SSH3/ARPC1B/CAPZB/PFN1/CDC42EP1/COTL1/BRK1	27
BP	GO:0001906	cell killing	30/1406	189/18903	6.34076e-05	0.000860622	0.000623212	PLEKHM2/RNF19B/TUBB/HMGN2/TAP2/B2M/LAMP1/KIF5B/ATN1/MYD88/HLA-E/HSP90AB1/HLA-B/HPRT1/ARL8B/ICAM1/HLA-A/HLA-F/HLA-DRA/CTSC/FCGR3A/NKG7/CTSH/RPS19/BCL2L1/TUBB4B/CD59/ROMO1/HLA-DRB1/GAPDH	30
BP	GO:0006839	mitochondrial transport	30/1406	189/18903	6.34076e-05	0.000860622	0.000623212	HUWE1/NMT1/HAX1/MFN2/CNP/LMAN1/SLC25A5/SAE1/PMAIP1/UBE2D3/SREBF2/HSP90AA1/HSPA4/TMEM14A/TOMM20/HSPD1/TP53/BAK1/BAG3/TIMM23/ALKBH7/TMEM14C/TOMM22/TSPO/PDCD5/CHCHD10/RAC2/UBL5/BCL2L1/ROMO1	30
BP	GO:0048511	rhythmic process	42/1406	302/18903	6.34394e-05	0.000860622	0.000623212	THRAP3/DHX9/HNRNPU/HUWE1/TOP1/PRKDC/TIMELESS/PRMT5/HNRNPL/ADNP/KDM5C/TOP2A/DDB1/CSNK2A1/SFPQ/CBX3/KLF10/PARP1/HSPA5/NONO/PCNA/CDK1/TYMS/PPP1CB/HDAC1/HNRNPD/PPP1CC/USP7/DDX5/TP53/AHCY/AXL/AHR/BHLHE40/MAGED1/MDK/PPP1CA/NAMPT/ATF5/EGR1/JUND/ID1	42
BP	GO:0048857	neural nucleus development	15/1406	65/18903	6.54805e-05	0.000886221	0.000641749	YWHAQ/CNP/HSPA5/CALM3/YWHAH/CALM2/RHOA/YWHAE/CDC42/ACTB/SEC16A/DYNLL1/CALM1/COX6B1/BASP1	15
BP	GO:0048026	positive regulation of mRNA splicing, via spliceosome	9/1406	26/18903	6.63975e-05	0.000894422	0.000647688	THRAP3/SNW1/PRMT5/RBMX/HSPA8/PRPF19/SF3B4/NCL/PRDX6	9
BP	GO:1900151	regulation of nuclear-transcribed mRNA catabolic process, deadenylation-dependent decay	9/1406	26/18903	6.63975e-05	0.000894422	0.000647688	DHX9/HNRNPU/CNOT1/PAIP1/SYNCRIP/CSDE1/HNRNPD/ZFP36L1/ZFP36L2	9
BP	GO:0001706	endoderm formation	14/1406	58/18903	6.73766e-05	0.000905491	0.000655703	GRB2/CTNNB1/ITGAV/PAF1/LAMA3/LAMB3/LAMB1/FN1/ITGB5/MMP14/SOX2/COL12A1/COL7A1/COL5A2	14
BP	GO:0035967	cellular response to topologically incorrect protein	22/1406	120/18903	6.78515e-05	0.000909748	0.000658786	DAXX/HSPA8/PTPN1/VCP/HSPA5/BAG6/ATF6B/TMED2/NFE2L2/OPTN/NCK2/HSPA9/CREB3/HSPD1/TM7SF3/BAK1/TMBIM6/BAG3/OS9/RNF5/ERMP1/HSPB8	22
BP	GO:0045216	cell-cell junction organization	32/1406	208/18903	6.82852e-05	0.000913434	0.000661456	ECT2/PAK2/DSG2/CTNNA1/CTNND1/CTNNB1/TLN1/RHOA/EFNB2/CDC42/PLEC/DSP/ACTB/ACTG1/MYO1C/PKP3/WDR1/PERP/FSCN1/CLDN1/CSF1R/FLNA/CAV1/SNAI2/RHOC/CDH1/PKP1/GJB2/TGFB1/GJA1/JUP/CD9	32
BP	GO:0050777	negative regulation of immune response	30/1406	190/18903	7.0044e-05	0.000934787	0.000676918	ADAR/OAS3/PARP14/YES1/YTHDF2/TRIM21/PARP1/SAMHD1/STAT2/IFI16/ZBTB7B/TRAFD1/HLA-E/HLA-B/TNFAIP3/HLA-A/HLA-F/PSMB4/OAS1/AHR/SERPING1/PLK2/FURIN/RPS19/CD59/MMP12/HLA-DRB1/VSIG4/GRN/ANXA1	30
BP	GO:0001701	in utero embryonic development	51/1406	393/18903	7.06169e-05	0.000940251	0.000680875	NMT1/MSH2/SLC39A1/CNOT1/WDTC1/C1orf43/ACTL6A/RIC8A/MFN2/NSUN2/GNA13/GRB2/INTS1/COPS3/ITGB1/NASP/CCNB1/CCNB2/CTNNB1/GNA12/ASF1B/TMED2/CAPN2/RRM2/EIF2S2/MYH9/HIF1A/TBL1XR1/SBDS/TRIM28/TP53/RTCB/GJB3/RPL13/ZFP36L1/SMARCB1/YBX3/DBN1/RTN4/EGFR/PSMC4/FURIN/GPI/DAD1/BCL2L1/IGF2/DSC3/ST14/BRK1/KRT19/FKBP10	51
BP	GO:0035456	response to interferon-beta	10/1406	32/18903	7.09931e-05	0.0009427	0.000682649	STAT1/PLSCR1/IFI16/IRF1/CAPN2/OAS1/AIM2/IFITM1/IFITM3/BST2	10
BP	GO:0019221	cytokine-mediated signaling pathway	61/1406	496/18903	7.11287e-05	0.0009427	0.000682649	ADAR/OAS3/PARP9/STAT3/PARP14/WNK1/STAT1/YTHDF2/PTPN1/PTPN11/ADIPOR2/JAK1/OAS2/IRAK1/SAMHD1/LSM14A/STAT2/RPS6KA4/MX1/IL13RA1/IRF1/ADIPOR1/RRAGA/OSMR/ACTN4/HIF1A/MYD88/PLP2/TP53/TNFAIP3/IFNGR2/IRF7/CXCL9/OAS1/IFNGR1/AIM2/AXL/CXCL10/IFITM1/CD74/CCR7/F3/IFITM3/CD44/EIF5A/IFI27/CSF1R/CAV1/CXCL11/P4HB/MMP12/EGR1/NFKBIA/TNFRSF1A/LAPTM5/CXCL13/CPNE1/CXCL1/CCL20/FCER1G/CIB1	61
BP	GO:0070507	regulation of microtubule cytoskeleton organization	26/1406	155/18903	7.4998e-05	0.000991698	0.00071813	HNRNPU/CKAP5/NUP62/DCTN1/PLK1/CKAP2/TPX2/TPR/ABL1/DYNC1H1/CHMP5/MAPRE1/CLTC/CDKN1B/CHMP1B/RHOA/GIT1/STMN1/DRG1/CHMP2B/FKBP4/MET/CHMP1A/RAC1/CIB1/CHMP2A	26
BP	GO:0000725	recombinational repair	28/1406	173/18903	7.75205e-05	0.00101941	0.000738197	MCM6/ACTR2/RPA1/UBQLN4/MCM2/TIMELESS/MCM4/RAD21/ACTL6A/SFPQ/FEN1/PARP1/NUCKS1/SAMHD1/MCM3/FUS/MCM7/XRCC6/XRCC5/RPA2/MCM5/MORF4L1/MORF4L2/MAGEF1/ACTB/RMI2/KDM1A/PPP4C	28
BP	GO:0032986	protein-DNA complex disassembly	8/1406	21/18903	7.76519e-05	0.00101941	0.000738197	SUPT16H/SSRP1/ARID1A/SET/SMARCC1/HMGA1/SMARCB1/MYC	8
BP	GO:0006735	NADH regeneration	7/1406	16/18903	7.79799e-05	0.00101941	0.000738197	PGK1/ENO1/TPI1/PFKP/HK1/ENO2/PKM	7
BP	GO:0061621	canonical glycolysis	7/1406	16/18903	7.79799e-05	0.00101941	0.000738197	PGK1/ENO1/TPI1/PFKP/HK1/ENO2/PKM	7
BP	GO:0061718	glucose catabolic process to pyruvate	7/1406	16/18903	7.79799e-05	0.00101941	0.000738197	PGK1/ENO1/TPI1/PFKP/HK1/ENO2/PKM	7
BP	GO:0034605	cellular response to heat	15/1406	66/18903	7.8979e-05	0.00103013	0.00074596	DAXX/TPR/VCP/IRAK1/RBBP7/MAPKAPK2/HSP90AA1/SUMO1/YWHAE/HSP90AB1/DNAJB1/BAG3/CXCL10/ANO1/THBS1	15
BP	GO:0007623	circadian rhythm	32/1406	210/18903	8.22997e-05	0.00106932	0.000774339	THRAP3/HNRNPU/HUWE1/TOP1/PRKDC/TIMELESS/PRMT5/HNRNPL/TOP2A/DDB1/SFPQ/KLF10/PARP1/NONO/CDK1/TYMS/PPP1CB/HDAC1/HNRNPD/PPP1CC/USP7/TP53/AHCY/AHR/BHLHE40/MAGED1/PPP1CA/NAMPT/ATF5/EGR1/JUND/ID1	32
BP	GO:1903078	positive regulation of protein localization to plasma membrane	14/1406	59/18903	8.23555e-05	0.00106932	0.000774339	ATP2C1/ZDHHC5/ARF6/ITGB1/SPTBN1/KIF5B/PPP1R9B/PRNP/ITGA3/EGFR/RHOG/SQSTM1/EZR/CIB1	14
BP	GO:2001251	negative regulation of chromosome organization	19/1406	97/18903	8.30963e-05	0.00107651	0.000779545	BAZ1B/HNRNPU/MCM2/RAD21/PLK1/HNRNPC/CDCA8/TOP2A/TINF2/TPR/PARP1/ZWINT/SMARCA5/CCNB1/BIRC5/CDC20/AURKB/PTTG1/HNRNPA1	19
BP	GO:0050863	regulation of T cell activation	49/1406	376/18903	8.74201e-05	0.00112807	0.000816881	YES1/ACTL6A/ARID1A/ABL1/PTPN11/HMGB1/PRKAR1A/SMARCC1/CTNNB1/CD47/SLC7A1/IRF1/ZBTB7B/B2M/RHOA/EFNB2/HSPH1/NCK2/CLPTM1/CD276/HLA-E/HSPD1/ACTB/TFRC/HLA-A/PRNP/SMARCB1/PLA2G2F/HLA-DRA/SOX4/HLA-DPA1/BATF/CD74/CCR7/MDK/RAC2/HLA-DQA1/CAV1/HLA-DQA2/IGF2/HLA-DMA/HLA-DRB1/VSIG4/HLA-DPB1/ANXA1/LAPTM5/EFNB1/IDO1/HLA-DQB1	49
BP	GO:0002381	immunoglobulin production involved in immunoglobulin-mediated immune response	16/1406	74/18903	8.74684e-05	0.00112807	0.000816881	MSH2/UNG/HMCES/B2M/HSPD1/TFRC/HLA-DRA/HLA-DPA1/BATF/HLA-DQA1/HLA-DQA2/HLA-DMA/HLA-DRB1/TGFB1/HLA-DPB1/HLA-DQB1	16
BP	GO:1901989	positive regulation of cell cycle phase transition	22/1406	122/18903	8.76762e-05	0.00112822	0.00081699	EIF4G1/DLGAP5/TFDP1/RRM1/DDX3X/CDCA5/RCC2/CDK1/CCNB1/FAM83D/APP/CDC25B/RRM2/UBE2C/PAF1/APEX1/CDK4/NPM1/PHB2/EGFR/TBX2/ANXA1	22
BP	GO:0071634	regulation of transforming growth factor beta production	11/1406	39/18903	8.87686e-05	0.00113973	0.000825323	ATP6AP2/LAPTM4B/ITGAV/HIF1A/HSP90AB1/CDH3/FERMT1/FN1/ITGB6/FURIN/THBS1	11
BP	GO:0042026	protein refolding	9/1406	27/18903	9.30518e-05	0.00119206	0.000863218	DNAJA1/HSPA8/HSPA5/B2M/HSP90AA1/HSPA9/HSPD1/HSPB1/FKBP1A	9
BP	GO:1903037	regulation of leukocyte cell-cell adhesion	49/1406	377/18903	9.34064e-05	0.00119394	0.000864583	YES1/WNK1/ACTL6A/ARID1A/ABL1/PTPN11/IRAK1/HMGB1/PRKAR1A/SMARCC1/CD47/SLC7A1/IRF1/ZBTB7B/B2M/RHOA/EFNB2/HSPH1/NCK2/CD276/HLA-E/HSPD1/ACTB/TFRC/HLA-A/PRNP/SMARCB1/PLA2G2F/HLA-DRA/SOX4/ST3GAL4/HLA-DPA1/CD74/CCR7/MDK/CD44/HLA-DQA1/CAV1/HLA-DQA2/IGF2/HLA-DMA/HLA-DRB1/VSIG4/HLA-DPB1/ANXA1/LAPTM5/EFNB1/IDO1/HLA-DQB1	49
BP	GO:1904377	positive regulation of protein localization to cell periphery	15/1406	67/18903	9.48466e-05	0.0012089	0.000875412	ATP2C1/ZDHHC5/ARF6/ITGB1/SPTBN1/KIF5B/PPP1R9B/PRNP/RAB38/ITGA3/EGFR/RHOG/SQSTM1/EZR/CIB1	15
BP	GO:0090169	regulation of spindle assembly	10/1406	33/18903	9.5111e-05	0.0012089	0.000875412	HNRNPU/PLK1/TPR/DYNC1H1/CHMP5/CHMP1B/DRG1/CHMP2B/CHMP1A/CHMP2A	10
BP	GO:0071453	cellular response to oxygen levels	28/1406	175/18903	9.52068e-05	0.0012089	0.000875412	UBQLN1/CCNA2/HP1BP3/ATP6V1A/IRAK1/HYOU1/PMAIP1/CDKN1B/E2F1/NFE2L2/HIF1A/PGK1/ENO1/TP53/ZFP36L1/TMBIM6/CHCHD2/PHB2/CYBB/MYC/CAV1/ATP6V1G1/P4HB/EGR1/JUND/NDUFS2/NDRG1/LMNA	28
BP	GO:0030833	regulation of actin filament polymerization	24/1406	140/18903	9.84062e-05	0.00124585	0.00090217	MTPN/HAX1/CAPZA1/GRB2/SPTAN1/ARF6/FLII/SPTBN1/RHOA/ARPC1A/NCK2/TWF1/PFN2/CDC42EP4/DBN1/CDC42EP5/ARPC2/CCR7/SSH3/ARPC1B/CAPZB/PFN1/CDC42EP1/COTL1	24
BP	GO:0044788	modulation by host of viral process	12/1406	46/18903	9.87668e-05	0.00124585	0.00090217	PAIP1/HSPA8/NUCKS1/PSMC3/CDC42/CAV2/STOM/IFI27/CSF1R/FASN/CFL1/EEF1A1	12
BP	GO:0046596	regulation of viral entry into host cell	12/1406	46/18903	9.87668e-05	0.00124585	0.00090217	TRIM26/TRIM21/HMGB1/TRIM22/IFITM1/SNX3/CD74/IFITM3/FURIN/P4HB/HLA-DRB1/LY6E	12
BP	GO:0031331	positive regulation of cellular catabolic process	54/1406	429/18903	9.92032e-05	0.00124861	0.000904174	DHX9/HNRNPU/DTX3L/UBQLN1/PATL1/LARP1/CNOT1/PLK1/SAMD4B/PAIP1/SPTLC1/YTHDF2/MTDH/AURKA/SYNCRIP/KHSRP/PTPN1/PSMD10/NUB1/VCP/CSDE1/YTHDF1/TRIM21/UBQLN2/HMGB1/SLC25A5/RNF19B/RALB/RAD23A/USP5/SUPT5H/TRIM22/PIP4K2C/APP/HNRNPD/CDC20/SUMO1/SUMO2/NFE2L2/OPTN/HIF1A/MAGEF1/POLR2G/ZFP36L1/ADAM9/BAG3/TNKS1BP1/PLK2/ZFP36L2/FURIN/CAV1/PLEKHF1/LAPTM5/HSPB8	54
BP	GO:0007599	hemostasis	34/1406	231/18903	0.000101209	0.00127108	0.000920444	GNA13/PLSCR1/LMAN1/RAP2B/TLN1/GNA12/NFE2L2/MYH9/ANXA5/ACTB/AK3/ACTG1/MYL12A/ITGA2/FZD6/AXL/CLIC1/ST3GAL4/HSPB1/SERPING1/F3/FN1/PPIA/PLAU/FLNA/CAV1/GPI/ANXA2/CD59/THBS1/ZNF385A/THBD/FCER1G/CD9	34
BP	GO:0009060	aerobic respiration	30/1406	194/18903	0.000103305	0.00129458	0.000937456	MSH2/VCP/CS/DLST/OGDH/CDK1/CCNB1/MDH1/RHOA/STOML2/HIF1A/GHITM/UQCRFS1/FH/UQCRC2/CHCHD2/NDUFB10/COX4I1/SHMT2/NDUFA1/COX6B1/UQCRQ/CHCHD10/MDH2/COX7C/UQCR10/IDH2/NDUFB7/NDUFS2/COX5B	30
BP	GO:0000727	double-strand break repair via break-induced replication	6/1406	12/18903	0.000104655	0.0013058	0.000945587	MCM6/MCM2/MCM4/MCM3/MCM7/MCM5	6
BP	GO:1900152	negative regulation of nuclear-transcribed mRNA catabolic process, deadenylation-dependent decay	6/1406	12/18903	0.000104655	0.0013058	0.000945587	DHX9/HNRNPU/PAIP1/SYNCRIP/CSDE1/HNRNPD	6
BP	GO:0007492	endoderm development	17/1406	83/18903	0.000108854	0.00135525	0.000981396	GRB2/CTNNB1/LAMC1/HDAC1/ITGAV/PAF1/LAMA3/ZFP36L1/LAMB3/LAMB1/FN1/ITGB5/MMP14/SOX2/COL12A1/COL7A1/COL5A2	17
BP	GO:0030901	midbrain development	18/1406	91/18903	0.00011102	0.00137924	0.000998764	YWHAQ/CNP/HSPA5/CALM3/YWHAH/CTNNB1/CALM2/RHOA/YWHAE/CDC42/ACTB/FZD6/SEC16A/DYNLL1/CALM1/COX6B1/UQCRQ/BASP1	18
BP	GO:0051495	positive regulation of cytoskeleton organization	30/1406	195/18903	0.000113577	0.00140796	0.00101957	CKAP5/NUP62/DCTN1/HAX1/ABL1/GRB2/DYNC1H1/ARF6/MAPRE1/WASF2/CDKN1B/CD47/RHOA/NCK2/GIT1/CDC42/PFN2/DRG1/CDC42EP4/MET/RAC1/CDC42EP5/WDR1/ARPC2/CCR7/RHOC/PFN1/CDC42EP1/ID1/BRK1	30
BP	GO:0006268	DNA unwinding involved in DNA replication	8/1406	22/18903	0.000114093	0.00140982	0.00102091	MCM6/RPA1/MCM2/MCM4/MCM3/MCM7/MCM5/HMGA1	8
BP	GO:0043434	response to peptide hormone	53/1406	421/18903	0.000114217	0.00140982	0.00102091	PRKDC/STAT3/CCNA2/WDTC1/STAT1/YWHAG/PTPN1/GRB2/PTPRA/PTPN11/JAK1/PARP1/NUCKS1/STAT2/CDKN1B/PIP4K2C/SMARCC1/AHCYL1/SRSF4/ADIPOR1/NCL/ZBTB7B/EIF4EBP2/NFE2L2/RAB10/SHC1/TNFSF10/RANGAP1/HADHA/APEX1/CAV2/ZFP36L1/MYO1C/RAB31/CDK4/DAG1/CYBB/AGTRAP/GNAI2/SPINK1/CAV1/PKM/IGF2/SRSF6/FBP1/EGR1/JUND/EIF6/GJB2/ANXA1/ERRFI1/APRT/AREG	53
BP	GO:0051973	positive regulation of telomerase activity	10/1406	34/18903	0.00012582	0.00154971	0.00112221	DKC1/PTGES3/CTNNB1/TCP1/XRCC5/HSP90AA1/AURKB/CCT4/HSP90AB1/MYC	10
BP	GO:0051851	modulation by host of symbiont process	17/1406	84/18903	0.00012715	0.00156026	0.00112985	SNW1/PAIP1/HSPA8/NUCKS1/TAF11/HDAC1/PSMC3/CDC42/CAV2/SMARCB1/STOM/IFI27/CSF1R/JUN/FASN/CFL1/EEF1A1	17
BP	GO:0010769	regulation of cell morphogenesis involved in differentiation	19/1406	100/18903	0.000127219	0.00156026	0.00112985	ACTR2/PRKDC/CAPRIN1/ABL1/RCC2/GBP1/CORO1C/CALR/ACTN4/CDC42/RAC1/DBN1/ARPC2/MDK/CRKL/C1QBP/FLNA/P4HB/CIB1	19
BP	GO:0033674	positive regulation of kinase activity	60/1406	496/18903	0.000128958	0.00157823	0.00114286	ECT2/PAK2/ZFP91/MOB1A/DAXX/ADNP/WNK1/IQGAP1/TPX2/DDX3X/PTPN1/ABL1/PSMD10/CKS1B/IRAK1/CAB39/PPP2CA/DVL3/RALB/CDKN1B/CCNB1/CALM3/XRCC6/XRCC5/CALM2/CDC25B/HSP90AA1/RHOA/ZNF622/CDC42/HSP90AB1/RPLP1/DAZAP2/MET/ADAM9/PRNP/AXL/CALM1/DAG1/NPM1/PHB2/DDR1/CD74/EGFR/CCR7/MAGED1/CKS2/JTB/PPIA/CSF1R/IGF2/THBS1/HLA-DRB1/EGR1/TGFB1/FGFR3/EPHB6/EFNA1/AREG/CIB1	60
BP	GO:0051346	negative regulation of hydrolase activity	48/1406	373/18903	0.00013954	0.00170368	0.0012337	PAK2/USP14/WNK1/UBE2Z/DDX3X/ABL1/CSNK2A1/INTS1/RCC2/PICALM/TMED10/IFI16/PPP1R11/APP/BIRC5/TMED2/ABCE1/PPP1R9B/PTTG1/URI1/ARL6IP1/PRDX3/TMBIM6/PRNP/IFI6/RAF1/MAGEA3/CAST/SERPING1/GNAI2/CD44/SPINK1/SERPINB1/DHCR24/FURIN/BST2/GPI/APLP2/ANXA2/COL7A1/SERPINH1/FKBP1A/SERPINB5/THBS1/ANXA1/CTSB/GAPDH/CST3	48
BP	GO:0050678	regulation of epithelial cell proliferation	52/1406	414/18903	0.000139801	0.00170368	0.0012337	NRAS/PRKDC/STAT3/STAT1/PYGO2/TINF2/HMGB1/CDKN1B/CTNNB1/LAMC1/HMGB2/B2M/EFNB2/HMGN1/HIF1A/CDKN2B/CDC42/B4GALT1/CDH3/TNFAIP3/TP63/CAV2/ZFP36L1/JAG1/CDK4/RTN4/PHB2/SOX9/EGFR/LAMB1/F3/MAGED1/MDK/CLDN1/SPINK1/GLUL/SOX2/MYC/JUN/CAV1/SNAI2/IGF2/MMP12/SERPINB5/SRSF6/THBS1/GRN/TGFB1/IRF6/ERRFI1/ID1/AREG	52
BP	GO:0030041	actin filament polymerization	27/1406	170/18903	0.000142833	0.00173694	0.00125779	DIAPH1/MTPN/HAX1/CAPZA1/ABL1/GRB2/SPTAN1/ARF6/FLII/SPTBN1/RHOA/ARPC1A/NCK2/TWF1/PFN2/CDC42EP4/RAC1/DBN1/CDC42EP5/ARPC2/CCR7/SSH3/ARPC1B/CAPZB/PFN1/CDC42EP1/COTL1	27
BP	GO:0038127	ERBB signaling pathway	22/1406	126/18903	0.000143354	0.00173961	0.00125972	NUP62/SNX6/IQGAP1/ABL1/GRB2/PTPN11/PTPN12/RALA/RALB/RAB7A/NCK2/SHC1/SHKBP1/IFI6/RTN4/SOX9/EGFR/EFEMP1/TGFB1/ERRFI1/FAM83A/AREG	22
BP	GO:0060338	regulation of type I interferon-mediated signaling pathway	11/1406	41/18903	0.000145769	0.00176358	0.00127708	ADAR/OAS3/YTHDF2/PTPN1/PTPN11/SAMHD1/LSM14A/STAT2/IRF7/OAS1/MMP12	11
BP	GO:0000381	regulation of alternative mRNA splicing, via spliceosome	14/1406	62/18903	0.000145943	0.00176358	0.00127708	THRAP3/HNRNPU/PTBP1/KHDRBS1/HNRNPL/RBMX/SRSF2/RBM8A/DDX5/MAGOH/DDX17/PUF60/HNRNPA1/SRSF6	14
BP	GO:0051651	maintenance of location in cell	33/1406	226/18903	0.000148262	0.00178712	0.00129413	HNRNPU/DIAPH1/ITPR3/CIZ1/ABL1/HSPA5/GOLPH3/CALM3/HSP90B1/CALM2/CALR/TWF1/RANGAP1/KDELR2/CXCL9/DBN1/HK1/OS9/SUN2/CALM1/CXCL10/GPAA1/TSPO/CCR7/CHCHD10/FLNA/CAV1/CXCL11/SRGN/FKBP1A/GM2A/KDELR1/FTH1	33
BP	GO:0007029	endoplasmic reticulum organization	18/1406	93/18903	0.000148512	0.00178712	0.00129413	ATL2/LMAN1/SEC61A1/UBL4A/BAG6/ESYT2/ESYT1/TMED2/CCDC47/RAB10/RTN3/ARL6IP1/CAV2/SEC16A/RTN4/REEP6/LMAN2/TRAM1	18
BP	GO:0051402	neuron apoptotic process	36/1406	255/18903	0.000151878	0.0018238	0.00132069	SNX6/MSH2/ADNP/HDGF/SET/ABL1/DNAJC5/PARP1/HSPA5/NONO/HYOU1/CTNNB1/MCL1/APP/NCSTN/RHOA/MYBL2/ATN1/HIF1A/SIGMAR1/PIGT/HSP90AB1/TP53/TP63/PPT1/TMBIM6/PRNP/AXL/SOD2/MDK/JUN/GPI/BCL2L1/UBE2M/GRN/GAPDH	36
BP	GO:0010761	fibroblast migration	13/1406	55/18903	0.000153028	0.00183378	0.00132792	PIP5K1A/IQGAP1/GNA13/RCC2/ITGB1/GNA12/CORO1C/MTA2/PLEC/RAC1/THBS1/TGFB1/SLC9A3R1	13
BP	GO:0046034	ATP metabolic process	32/1406	217/18903	0.000154107	0.00184288	0.0013345	STAT3/HSPA8/VCP/ATP6V1A/PARP1/OGDH/PGM1/APP/STOML2/HIF1A/PGK1/LDHA/GIT1/ENO1/TPI1/PFKP/PGAM1/NT5E/ATP1B1/HK1/NDUFB10/TSPO/NDUFA1/ENO2/GPI/PKM/NDUFB7/FBP1/EIF6/TGFB1/NDUFS2/GAPDH	32
BP	GO:0071359	cellular response to dsRNA	8/1406	23/18903	0.000163582	0.00195212	0.00141361	DHX9/IFIH1/RALB/RIOK3/IFIT1/NPM1/CAV1/FLOT1	8
BP	GO:0120032	regulation of plasma membrane bounded cell projection assembly	30/1406	199/18903	0.000164449	0.0019549	0.00141562	ACTR2/ACTR3/ANLN/ARF6/AKIRIN1/RCC2/RALA/WASF2/CORO1C/HSP90AA1/GDI2/TWF1/CDC42/PFN2/ICAM1/CDC42EP4/RAC1/CDC42EP5/ARPC2/CCR7/RAC2/FSCN1/RHOG/CAV1/CAPZB/PFN1/PLEK2/CDC42EP1/DPYSL3/BRK1	30
BP	GO:1905898	positive regulation of response to endoplasmic reticulum stress	10/1406	35/18903	0.000164494	0.0019549	0.00141562	UBQLN1/PTPN1/UBQLN2/PMAIP1/BAG6/NFE2L2/NCK2/BAK1/SERINC3/CAV1	10
BP	GO:0022407	regulation of cell-cell adhesion	59/1406	490/18903	0.000165801	0.00196636	0.00142392	YES1/WNK1/ACTL6A/YTHDF2/ARID1A/ABL1/PTPN11/JAK1/IRAK1/HMGB1/PRKAR1A/SMARCC1/CD47/SLC7A1/IRF1/ZBTB7B/B2M/RHOA/EFNB2/HSPH1/NCK2/CD276/HLA-E/HSPD1/ACTB/TFRC/HLA-A/PRNP/SMARCB1/PLA2G2F/JAG1/HLA-DRA/SOX4/ST3GAL4/HLA-DPA1/CD74/CCR7/MDK/CD44/HLA-DQA1/SOX2/CAV1/HLA-DQA2/CDH1/IGF2/HLA-DMA/FLOT1/HLA-DRB1/VSIG4/TGFB1/HLA-DPB1/EPCAM/ANXA1/LAPTM5/CXCL13/EFNB1/IDO1/CD9/HLA-DQB1	59
BP	GO:0031058	positive regulation of histone modification	19/1406	102/18903	0.000167045	0.00197705	0.00143166	HCFC1/BAZ1B/DEK/DNMT1/SNW1/DDX21/JARID2/WDR5/SMARCA5/CTNNB1/SF3B1/ZBTB7B/TP53/KDM1A/PAF1/SMARCB1/NELFE/SNAI2/LMNA	19
BP	GO:0045732	positive regulation of protein catabolic process	31/1406	209/18903	0.000174274	0.00205797	0.00149026	UBQLN1/PLK1/AURKA/DDB1/CSNK2A1/PSMD10/NUB1/VCP/PSMC2/UBQLN2/RNF19B/RAD23A/RAB7A/CDKN1B/USP5/BAG6/CDC20/HSP90AA1/SUMO1/SUMO2/NFE2L2/PSMC3/MSN/TNFAIP3/ADAM9/SOX9/PLK2/PSMC4/FURIN/CAV1/EZR	31
BP	GO:0044091	membrane biogenesis	14/1406	63/18903	0.000174956	0.00205797	0.00149026	CHMP5/PICALM/SERINC1/SPTBN1/CHMP1B/MAFB/CHMP2B/CAV2/CHMP1A/RCC1/CAV1/ANXA2/FLOT1/CHMP2A	14
BP	GO:0070059	intrinsic apoptotic signaling pathway in response to endoplasmic reticulum stress	14/1406	63/18903	0.000174956	0.00205797	0.00149026	PTPN1/HYOU1/PMAIP1/BAG6/TXNDC12/NCK2/CREB3/TP53/BAK1/TMBIM6/MAGEA3/SERINC3/GRINA/BCL2L1	14
BP	GO:0120034	positive regulation of plasma membrane bounded cell projection assembly	20/1406	111/18903	0.000182437	0.00213926	0.00154913	ACTR2/ACTR3/ANLN/AKIRIN1/RALA/WASF2/HSP90AA1/CDC42/CDC42EP4/RAC1/CDC42EP5/ARPC2/CCR7/RAC2/FSCN1/PFN1/PLEK2/CDC42EP1/DPYSL3/BRK1	20
BP	GO:0002449	lymphocyte mediated immunity	47/1406	367/18903	0.000182611	0.00213926	0.00154913	MSH2/PLEKHM2/HMGB1/RNF19B/TUBB/TAP2/UNG/HMCES/B2M/LAMP1/KIF5B/MYD88/HLA-E/HSPD1/HLA-B/HPRT1/TFRC/ARL8B/ICAM1/IRF7/HLA-A/HLA-F/JAG1/HLA-DRA/CTSC/HLA-DPA1/BATF/CD74/FCGR3A/AHR/SERPING1/C1QC/HLA-DQA1/NKG7/C1QBP/CTSH/HLA-DQA2/C1QB/TUBB4B/HLA-DMA/HLA-DRB1/TGFB1/HLA-DPB1/C1R/C1S/FCER1G/HLA-DQB1	47
BP	GO:0071604	transforming growth factor beta production	11/1406	42/18903	0.000184342	0.00215207	0.00155841	ATP6AP2/LAPTM4B/ITGAV/HIF1A/HSP90AB1/CDH3/FERMT1/FN1/ITGB6/FURIN/THBS1	11
BP	GO:0071559	response to transforming growth factor beta	38/1406	277/18903	0.000184453	0.00215207	0.00155841	PAK2/SNW1/SNX6/STAT3/YES1/STRAP/ABL1/RBBP7/PARP1/HSPA5/RBBP4/HDAC1/SDCBP/CDKN2B/HSP90AB1/TP53/FERMT1/CAV2/ZFP36L1/ADAM9/ITGA3/SOX9/PDCD5/ZYX/MXRA5/ITGB6/CRKL/CLDN1/ZFP36L2/ITGB5/FURIN/JUN/CAV1/PMEPA1/FKBP1A/THBS1/TGFB1/ID1	38
BP	GO:0050900	leukocyte migration	50/1406	398/18903	0.000185345	0.0021581	0.00156277	YES1/WNK1/ABL1/AKIRIN1/HMGB1/ITGB1/GOLPH3/CD47/APP/RHOA/MYH9/CALR/MYD88/MSN/CDC42/PLEC/SBDS/CREB3/B4GALT1/ITGA6/ICAM1/ITGA2/CXCL9/RAC1/CXCL16/CXCL10/PODXL2/ITGA3/WDR1/ST3GAL4/CD74/CCR7/MDK/RAC2/CRKL/PPIA/MMP14/CSF1R/RHOG/C1QBP/CXCL11/RPS19/CNN2/THBS1/ANXA1/CXCL13/CXCL1/CCL20/FCER1G/CD9	50
BP	GO:0043331	response to dsRNA	13/1406	56/18903	0.000185878	0.00215994	0.0015641	DHX9/DDX21/IFIH1/PMAIP1/DDX1/RALB/RIOK3/IFIT1/NPM1/CAV1/FLOT1/SLC3A2/NFKBIA	13
BP	GO:0046112	nucleobase biosynthetic process	7/1406	18/18903	0.000190008	0.00219463	0.00158922	PRPS1/CMPK1/PAICS/CTPS1/HPRT1/SHMT2/APRT	7
BP	GO:0061620	glycolytic process through glucose-6-phosphate	7/1406	18/18903	0.000190008	0.00219463	0.00158922	PGK1/ENO1/TPI1/PFKP/HK1/ENO2/PKM	7
BP	GO:0061952	midbody abscission	7/1406	18/18903	0.000190008	0.00219463	0.00158922	CEP55/KIF20A/CHMP5/CHMP1B/CHMP2B/CHMP1A/CHMP2A	7
BP	GO:0007006	mitochondrial membrane organization	21/1406	120/18903	0.000194621	0.00223902	0.00162137	NMT1/IMMT/MFN2/CNP/SLC25A5/PMAIP1/CALM3/HSP90AA1/HSPA4/TMEM14A/HSPA9/TOMM20/GHITM/TP53/BAK1/ALKBH7/TOMM22/PDCD5/CHCHD10/BCL2L1/ROMO1	21
BP	GO:0070997	neuron death	47/1406	368/18903	0.00019463	0.00223902	0.00162137	SNX6/EIF4G1/MSH2/DAXX/ADNP/HDGF/SET/ABL1/DNAJC5/PARP1/HSPA5/NONO/HYOU1/PICALM/CTNNB1/MCL1/APP/NCSTN/RHOA/SNCG/CAPN2/MYBL2/ATN1/EFNB2/HIF1A/SIGMAR1/PIGT/HSP90AB1/TP53/TP63/PPT1/HLA-F/TMBIM6/PRNP/AXL/CTSZ/SOD2/MDK/DHCR24/ENO2/JUN/GPI/BCL2L1/UBE2M/EGR1/GRN/GAPDH	47
BP	GO:0060491	regulation of cell projection assembly	30/1406	201/18903	0.000196835	0.00225987	0.00163647	ACTR2/ACTR3/ANLN/ARF6/AKIRIN1/RCC2/RALA/WASF2/CORO1C/HSP90AA1/GDI2/TWF1/CDC42/PFN2/ICAM1/CDC42EP4/RAC1/CDC42EP5/ARPC2/CCR7/RAC2/FSCN1/RHOG/CAV1/CAPZB/PFN1/PLEK2/CDC42EP1/DPYSL3/BRK1	30
BP	GO:0034599	cellular response to oxidative stress	39/1406	288/18903	0.000200743	0.00230015	0.00166563	ECT2/UBQLN1/MELK/NFE2L1/ABL1/STAU1/SFPQ/PARP1/NONO/ATP2A2/PCNA/CDK1/CTNNB1/MCL1/NFE2L2/HIF1A/SIGMAR1/ZNF622/TP53/TNFAIP3/APEX1/PRDX3/MET/CHCHD2/AXL/OSER1/SOD2/DHRS2/HSPB1/EGFR/NET1/ABCC1/PPIA/JUN/P4HB/ROMO1/GJB2/ERMP1/ANXA1	39
BP	GO:0045931	positive regulation of mitotic cell cycle	22/1406	129/18903	0.000203704	0.00232944	0.00168684	EIF4G1/DLGAP5/TFDP1/RRM1/DDX3X/ABL1/CDCA5/PTPN11/RCC2/CDK1/CCNB1/APP/CDC25B/USP22/RRM2/UBE2C/APEX1/CDK4/POLDIP2/PHB2/EGFR/ANXA1	22
BP	GO:0009612	response to mechanical stimulus	31/1406	211/18903	0.000207419	0.00236721	0.0017142	MTPN/STAT1/CTNNB1/IRF1/RHOA/CAPN2/MYD88/PLEC/ACTG1/BAK1/ITGA2/RAF1/BAG3/CXCL10/DAG1/SOX9/MDK/MMP14/JUN/GPI/GADD45A/TXNIP/CNN2/THBS1/SLC38A2/JUND/NFKBIA/KRT5/ABHD12/TNFRSF1A/JUP	31
BP	GO:1903131	mononuclear cell differentiation	57/1406	473/18903	0.000207857	0.00236751	0.00171441	PRKDC/STAT3/MSH2/ACTL6A/ARID1A/ABL1/HMGB1/ITGB1/SLC25A5/IFI16/IRF2BP2/SMARCC1/CTNNB1/XRCC6/IRF1/ZBTB7B/B2M/RHOA/MYH9/CLPTM1/MAFB/KLF6/ACTB/TP53/HLA-B/LRRC8A/BAK1/IRF7/ZFP36L1/SMARCB1/HLA-DRA/SOX4/AXL/DHRS2/BATF/CD74/CCR7/HMGB3/ITGB6/MDK/ZFP36L2/MMP14/CSF1R/MYC/JUN/FASN/UBD/HLA-DRB1/EGR1/KDELR1/ANXA1/CTSL/SLC39A7/FCER1G/TMEM176B/RPS6/TOP2B	57
BP	GO:0010950	positive regulation of endopeptidase activity	27/1406	174/18903	0.000211594	0.00240531	0.00174178	PSME3/STAT3/DDX3X/VCP/HMGB1/APH1A/PMAIP1/PICALM/IFI16/ANP32B/NCSTN/MTCH1/RHOA/TNFSF10/HSPD1/BAK1/PSME1/AIM2/PDCD5/PERP/F3/PSME2/ADRM1/MYC/CTSH/LAPTM5/EFNA1	27
BP	GO:0030224	monocyte differentiation	10/1406	36/18903	0.000212703	0.00240841	0.00174403	IFI16/MYH9/IRF7/ZFP36L1/CD74/CSF1R/MYC/JUN/FASN/HLA-DRB1	10
BP	GO:0071711	basement membrane organization	10/1406	36/18903	0.000212703	0.00240841	0.00174403	RIC8A/ITGB1/LAMC1/CTSS/FERMT1/CAV2/DAG1/LAMB3/LAMB1/CAV1	10
BP	GO:0006626	protein targeting to mitochondrion	19/1406	104/18903	0.000217419	0.00245697	0.00177919	HUWE1/HAX1/MFN2/LMAN1/SAE1/UBE2D3/SREBF2/HSP90AA1/HSPA4/TOMM20/HSPD1/BAG3/TIMM23/TOMM22/TSPO/PDCD5/RAC2/UBL5/ROMO1	19
BP	GO:0031623	receptor internalization	21/1406	121/18903	0.00021928	0.00246829	0.00178739	GRB2/AP2B1/UBQLN2/ITGB1/CLTC/PICALM/RALA/RALB/SDCBP/EFNB2/ARF1/TFRC/AP2M1/RAB31/CD63/CAV1/ANXA2/FLOT1/FCER1G/EZR/CD9	21
BP	GO:0051101	regulation of DNA binding	21/1406	121/18903	0.00021928	0.00246829	0.00178739	PARP1/HMGB1/SUMO3/IFI16/CALM3/CTNNB1/CALM2/HMGB2/SUMO1/E2F1/TRIM28/DAZAP2/KDM1A/ITGA2/CALM1/ZMPSTE24/JUN/NFKBIA/TGFB1/CPNE1/ID1	21
BP	GO:0032608	interferon-beta production	13/1406	57/18903	0.000224597	0.00251829	0.0018236	DHX9/OAS3/DDX3X/PTPN11/IFIH1/OAS2/IRF1/HMGB2/HSP90AA1/RIOK3/IRF7/OAS1/FLOT1	13
BP	GO:0032648	regulation of interferon-beta production	13/1406	57/18903	0.000224597	0.00251829	0.0018236	DHX9/OAS3/DDX3X/PTPN11/IFIH1/OAS2/IRF1/HMGB2/HSP90AA1/RIOK3/IRF7/OAS1/FLOT1	13
BP	GO:1903321	negative regulation of protein modification by small protein conjugation or removal	18/1406	96/18903	0.000225495	0.00252344	0.00182733	DTX3L/DNAJA1/ABL1/TRIM21/U2AF2/CTNNB1/CDC20/IVNS1ABP/RPS15/TNFAIP3/RPS20/SOX4/TSPO/PPIA/CAV1/SQSTM1/RPL37/RPL11	18
BP	GO:0006282	regulation of DNA repair	31/1406	212/18903	0.000226013	0.00252432	0.00182797	DHX9/USP1/DTX3L/DEK/ACTR2/PRKDC/FOXM1/PARP9/UBQLN4/TIMELESS/ACTL6A/ARID1A/SF3B3/PARP1/HMGB1/PCNA/FUS/SMARCC1/RPA2/MORF4L1/USP22/TAF7/MORF4L2/MAGEF1/TRIM28/ACTB/RMI2/KDM1A/SMARCB1/EGFR/PPP4C	31
BP	GO:0007097	nuclear migration	8/1406	24/18903	0.000229455	0.00255285	0.00184863	DCTN1/LMNB1/LMNB2/DYNC1H1/CDC42/SUN2/SLC9A3R1/LMNA	8
BP	GO:1903902	positive regulation of viral life cycle	8/1406	24/18903	0.000229455	0.00255285	0.00184863	KPNA2/TRIM21/HMGB1/AXL/CD74/FURIN/P4HB/HLA-DRB1	8
BP	GO:0008608	attachment of spindle microtubules to kinetochore	11/1406	43/18903	0.000231224	0.00256757	0.00185928	HNRNPU/ECT2/RACGAP1/CDCA8/KIF2C/RCC2/MAPRE1/CCNB1/BIRC5/AURKB/CDC42	11
BP	GO:1903747	regulation of establishment of protein localization to mitochondrion	12/1406	50/18903	0.000233507	0.00258793	0.00187403	HUWE1/NMT1/HAX1/DNAJA1/LMAN1/SAE1/UBE2D3/SREBF2/BAG3/PDCD5/RAC2/UBL5	12
BP	GO:0007009	plasma membrane organization	26/1406	166/18903	0.000236171	0.00260741	0.00188813	PLSCR1/CHMP5/PLEKHM2/ATP2A2/SPTBN1/CHMP1B/MYH9/PLEC/MAFB/MICALL1/CLPTM1L/ARL8B/CHMP2B/CAV2/CHMP1A/AHNAK/EHD2/DEGS1/MYOF/CAV1/ANXA2/FLOT1/NDRG1/SLC9A3R1/CD9/CHMP2A	26
BP	GO:2001022	positive regulation of response to DNA damage stimulus	26/1406	166/18903	0.000236171	0.00260741	0.00188813	DHX9/USP1/DTX3L/ACTR2/PRKDC/FOXM1/PARP9/TIMELESS/ACTL6A/ARID1A/PARP1/HMGB1/PMAIP1/PCNA/FUS/SMARCC1/MORF4L1/MORF4L2/TRIM28/DDX5/ACTB/SMARCB1/EGFR/MYC/ZNF385A/RPL26	26
BP	GO:0044839	cell cycle G2/M phase transition	25/1406	157/18903	0.000237733	0.00261962	0.00189698	FOXM1/RRM1/KHDRBS1/MELK/CCNA2/RAD21/PLK1/AURKA/RCC2/ARPP19/CDK1/CCNB1/CALM3/CCNB2/CDK2/APP/CALM2/CDC25B/AURKB/TP53/CDK4/CALM1/NPM1/ENSA/ATF5	25
BP	GO:0071216	cellular response to biotic stimulus	36/1406	261/18903	0.000241727	0.00265853	0.00192515	SMC1A/MTDH/ABL1/PRPF8/IRAK1/CHMP5/HSPA5/HMGB1/SBNO2/HMGB2/RHOA/CAPN2/EFNB2/CCDC47/MYD88/GIT1/TNIP1/TP53/SLC7A5/PAF1/LITAF/TNFAIP3/CXCL9/ADAM9/CDK4/AXL/CXCL10/ZMPSTE24/TSPO/CDA/CXCL11/TXNIP/NFKBIA/TGFB1/CXCL13/CXCL1	36
BP	GO:0071560	cellular response to transforming growth factor beta stimulus	37/1406	271/18903	0.000245137	0.00269089	0.00194858	PAK2/SNW1/SNX6/STAT3/YES1/STRAP/ABL1/RBBP7/PARP1/HSPA5/RBBP4/HDAC1/SDCBP/CDKN2B/HSP90AB1/TP53/FERMT1/CAV2/ZFP36L1/ADAM9/ITGA3/SOX9/PDCD5/ZYX/ITGB6/CRKL/CLDN1/ZFP36L2/ITGB5/FURIN/JUN/CAV1/PMEPA1/FKBP1A/THBS1/TGFB1/ID1	37
BP	GO:2000045	regulation of G1/S transition of mitotic cell cycle	28/1406	185/18903	0.000250005	0.0027391	0.0019835	PSME3/EIF4G1/PRKDC/TFDP1/RRM1/CTDSP2/ACTL6A/ARID1A/DDX3X/PPP2CA/CDKN1B/SMARCC1/CDK2/RPA2/RRM2/E2F1/CDKN2A/CDKN2B/ACTB/TP53/APEX1/PSME1/SMARCB1/EGFR/PLK2/PSME2/ANXA1/RPL26	28
BP	GO:0008544	epidermis development	46/1406	362/18903	0.000254243	0.00278024	0.00201329	TFDP1/ATP2C1/PIP5K1A/NSUN2/PUM2/ATP2A2/CTNNB1/HDAC1/CLIC4/PLEC/MAFB/FLNB/DSP/FOSL2/CDH3/FZD6/FERMT1/ESRP1/LAMA3/TRPC4AP/TP63/ZFP36L1/ADAM9/COL17A1/JAG1/LAMB3/ZMPSTE24/SOX9/LAMC2/EGFR/KRT7/PLOD1/COL7A1/KRT6A/TXNIP/SRSF6/HLA-DRB1/KRT5/EVPL/IRF6/ANXA1/ST14/ERRFI1/KRT8/SLC9A3R1/KRT6C	46
BP	GO:0010634	positive regulation of epithelial cell migration	27/1406	176/18903	0.000255928	0.00279157	0.00202149	ABL1/ARF6/MAP4K4/HMGB1/RIN2/NFE2L2/CALR/HIF1A/ITGA2/AAMP/MET/ADAM9/RAC1/RTN4/ITGA3/SOX9/HSPB1/PLK2/CTSH/JUN/GPI/THBS1/PFN1/GRN/TGFB1/ANXA1/CIB1	27
BP	GO:0010951	negative regulation of endopeptidase activity	35/1406	252/18903	0.00025625	0.00279157	0.00202149	PAK2/USP14/UBE2Z/DDX3X/CSNK2A1/INTS1/PICALM/TMED10/IFI16/APP/BIRC5/PTTG1/ARL6IP1/PRDX3/PRNP/IFI6/RAF1/MAGEA3/CAST/SERPING1/CD44/SPINK1/SERPINB1/DHCR24/FURIN/BST2/GPI/APLP2/ANXA2/COL7A1/SERPINH1/SERPINB5/THBS1/GAPDH/CST3	35
BP	GO:0031346	positive regulation of cell projection organization	45/1406	352/18903	0.000257883	0.00280405	0.00203053	ACTR2/ACTR3/ADNP/ANLN/CAPRIN1/ABL1/AKIRIN1/HSPA5/RALA/DVL3/WASF2/PLXNA1/CORO1C/HSP90AA1/NFE2L2/TWF1/GDI1/SCARB2/CDC42/TMEM30A/KDM1A/ITGA6/CDC42EP4/ITGA2/PTK7/RAC1/DBN1/CDC42EP5/ITGA3/SNX3/ARPC2/TUBB2B/CCR7/FN1/MDK/RAC2/FSCN1/FLNA/PLXNB2/PFN1/PLEK2/GRN/CDC42EP1/DPYSL3/BRK1	45
BP	GO:0007266	Rho protein signal transduction	23/1406	140/18903	0.00026083	0.00283075	0.00204986	RACGAP1/ABL1/GNA13/CDC42SE1/ITGB1/TNFAIP1/GNA12/RHOA/CDC42/STMN1/CDC42EP4/MET/ARHGDIA/RAC1/CDC42EP5/RAF1/ITGA3/NET1/RHOG/CFL1/FLOT1/RHOD/CDC42EP1	23
BP	GO:0031529	ruffle organization	13/1406	58/18903	0.000270017	0.00292492	0.00211806	PIP5K1A/ARF6/RCC2/CORO1C/PFN2/LIMA1/ICAM1/RAC1/CCR7/CSF1R/RHOG/CAV1/PFN1	13
BP	GO:0097191	extrinsic apoptotic signaling pathway	32/1406	224/18903	0.000277696	0.00300246	0.00217421	PAK2/PSME3/DAXX/DDX3X/PMAIP1/CTNNA1/MCL1/HMGB2/ITGAV/TNFSF10/PEA15/ITGA6/ICAM1/BAK1/TNFAIP3/PDIA3/PPP2R1A/IFI6/RAF1/BAG3/PPP1CA/IFI27/CAV1/SNAI2/BCL2L1/MAL/THBS1/TNFRSF1A/TGFB1/FGFR3/LMNA/CIB1	32
BP	GO:0043281	regulation of cysteine-type endopeptidase activity involved in apoptotic process	30/1406	205/18903	0.000279132	0.00301068	0.00218016	PAK2/DDX3X/CSNK2A1/VCP/INTS1/HMGB1/PMAIP1/ANP32B/BIRC5/MTCH1/RHOA/TNFSF10/HSPD1/BAK1/ARL6IP1/TP63/PRDX3/IFI6/RAF1/MAGEA3/PDCD5/F3/CD44/DHCR24/SOX2/MYC/CTSH/GPI/THBS1/LAPTM5	30
BP	GO:0010466	negative regulation of peptidase activity	36/1406	263/18903	0.000280858	0.00301068	0.00218016	PAK2/USP14/UBE2Z/DDX3X/CSNK2A1/INTS1/PICALM/TMED10/IFI16/APP/BIRC5/PTTG1/ARL6IP1/PRDX3/PRNP/IFI6/RAF1/MAGEA3/CAST/SERPING1/CD44/SPINK1/SERPINB1/DHCR24/FURIN/BST2/GPI/APLP2/ANXA2/COL7A1/SERPINH1/SERPINB5/THBS1/CTSB/GAPDH/CST3	36
BP	GO:0015980	energy derivation by oxidation of organic compounds	43/1406	333/18903	0.000281502	0.00301068	0.00218016	MSH2/VCP/PTGES3/CS/DLST/PUM2/OGDH/CDK1/PPP1CB/CCNB1/MDH1/PPP1CC/RHOA/STOML2/HIF1A/PGM2/PLEC/GHITM/UQCRFS1/FH/TP53/UQCRC2/CHCHD2/NDUFB10/COX4I1/SHMT2/SOD2/NDUFA1/COX6B1/PYGB/UQCRQ/CHCHD10/MDH2/PPP1CA/MYC/COX7C/UQCR10/IDH2/NDUFB7/IGF2/PYGL/NDUFS2/COX5B	43
BP	GO:0006337	nucleosome disassembly	7/1406	19/18903	0.000281597	0.00301068	0.00218016	SUPT16H/SSRP1/ARID1A/SET/SMARCC1/HMGA1/SMARCB1	7
BP	GO:0007076	mitotic chromosome condensation	7/1406	19/18903	0.000281597	0.00301068	0.00218016	BAZ1B/PLK1/NCAPD2/NUSAP1/CDCA5/SMARCA5/CHMP1A	7
BP	GO:0061615	glycolytic process through fructose-6-phosphate	7/1406	19/18903	0.000281597	0.00301068	0.00218016	PGK1/ENO1/TPI1/PFKP/HK1/ENO2/PKM	7
BP	GO:1900026	positive regulation of substrate adhesion-dependent cell spreading	11/1406	44/18903	0.000287794	0.00307123	0.00222401	ABL1/CALR/CDC42/RAC1/ARPC2/MDK/CRKL/C1QBP/FLNA/P4HB/CIB1	11
BP	GO:0007369	gastrulation	29/1406	196/18903	0.000289889	0.00308786	0.00223605	WNK1/RIC8A/GRB2/EXT2/ITGB1/PRKAR1A/CTNNB1/ITGAV/TP53/ITGA2/PAF1/LAMA3/ETS2/ITGB4/DAG1/ITGA3/LAMB3/LAMB1/FN1/ITGB5/MMP14/SOX2/GPI/TXNRD1/COL12A1/COL7A1/COL5A2/GJA1/RPS6	29
BP	GO:0007040	lysosome organization	18/1406	98/18903	0.000294376	0.00312408	0.00226228	RAB14/SNAPIN/ATP6V1A/CHMP5/RAB7A/PI4KB/TPP1/CHMP1B/ATP6AP2/LAPTM4B/SCARB2/ARL8B/CHMP2B/PPT1/CHMP1A/GRN/LAPTM5/CHMP2A	18
BP	GO:0080171	lytic vacuole organization	18/1406	98/18903	0.000294376	0.00312408	0.00226228	RAB14/SNAPIN/ATP6V1A/CHMP5/RAB7A/PI4KB/TPP1/CHMP1B/ATP6AP2/LAPTM4B/SCARB2/ARL8B/CHMP2B/PPT1/CHMP1A/GRN/LAPTM5/CHMP2A	18
BP	GO:0046598	positive regulation of viral entry into host cell	6/1406	14/18903	0.000298675	0.00314648	0.0022785	TRIM21/HMGB1/CD74/FURIN/P4HB/HLA-DRB1	6
BP	GO:0075294	positive regulation by symbiont of entry into host	6/1406	14/18903	0.000298675	0.00314648	0.0022785	TRIM21/HMGB1/CD74/FURIN/P4HB/HLA-DRB1	6
BP	GO:0098760	response to interleukin-7	6/1406	14/18903	0.000298675	0.00314648	0.0022785	HDGF/RAD23B/STIP1/PDIA3/CRKL/P4HB	6
BP	GO:0098761	cellular response to interleukin-7	6/1406	14/18903	0.000298675	0.00314648	0.0022785	HDGF/RAD23B/STIP1/PDIA3/CRKL/P4HB	6
BP	GO:0002221	pattern recognition receptor signaling pathway	28/1406	187/18903	0.000299717	0.00315169	0.00228227	UBQLN1/OAS3/DDX3X/ZDHHC5/IFIH1/IRAK1/LSM14A/PUM2/HMGB1/DDX60/MAPKAPK2/IRF1/CTSS/MYD88/HSPD1/TNIP1/RIOK3/TNFAIP3/IRF7/OAS1/AIM2/RTN4/PHB2/IFI35/C1QBP/CAV1/FLOT1/NFKBIA	28
BP	GO:0007596	blood coagulation	32/1406	225/18903	0.00030117	0.00316118	0.00228914	GNA13/PLSCR1/LMAN1/RAP2B/TLN1/GNA12/NFE2L2/MYH9/ANXA5/ACTB/AK3/ACTG1/MYL12A/ITGA2/FZD6/AXL/CLIC1/ST3GAL4/HSPB1/SERPING1/F3/FN1/PPIA/PLAU/FLNA/CAV1/ANXA2/CD59/THBS1/THBD/FCER1G/CD9	32
BP	GO:0000724	double-strand break repair via homologous recombination	26/1406	169/18903	0.000315288	0.00328828	0.00238118	MCM6/ACTR2/RPA1/UBQLN4/MCM2/TIMELESS/MCM4/RAD21/ACTL6A/SFPQ/FEN1/PARP1/NUCKS1/SAMHD1/MCM3/FUS/MCM7/RPA2/MCM5/MORF4L1/MORF4L2/MAGEF1/ACTB/RMI2/KDM1A/PPP4C	26
BP	GO:0007568	aging	26/1406	169/18903	0.000315288	0.00328828	0.00238118	CANX/GNA13/GRB2/CNP/IRAK1/RPN2/TYMS/CTNNA1/GNA12/AURKB/PPP1R9B/NFE2L2/CDKN2B/TFRC/BAK1/TP63/APEX1/DAG1/CTSC/TSPO/SOD2/SERPING1/CLDN1/JUND/GJB2/GPX4	26
BP	GO:0006007	glucose catabolic process	8/1406	25/18903	0.000315565	0.00328828	0.00238118	PGK1/ENO1/TPI1/TP53/PFKP/HK1/ENO2/PKM	8
BP	GO:0006658	phosphatidylserine metabolic process	8/1406	25/18903	0.000315565	0.00328828	0.00238118	PLSCR1/SERINC1/PTDSS1/MBOAT1/PLA2G2F/SERINC3/SERINC2/ABHD12	8
BP	GO:0033045	regulation of sister chromatid segregation	19/1406	107/18903	0.000317824	0.00330583	0.00239389	HNRNPU/DLGAP5/RAD21/PLK1/ACTL6A/CDCA8/ARID1A/TPR/ZWINT/CCNB1/SMARCC1/BIRC5/CDC20/AURKB/PTTG1/UBE2C/ACTB/RMI2/SMARCB1	19
BP	GO:0071456	cellular response to hypoxia	24/1406	151/18903	0.000322781	0.00334809	0.00242449	UBQLN1/CCNA2/HP1BP3/IRAK1/HYOU1/PMAIP1/CDKN1B/E2F1/NFE2L2/HIF1A/PGK1/ENO1/TP53/ZFP36L1/TMBIM6/CHCHD2/PHB2/CYBB/MYC/P4HB/EGR1/JUND/NDRG1/LMNA	24
BP	GO:0071709	membrane assembly	13/1406	59/18903	0.000323051	0.00334809	0.00242449	CHMP5/PICALM/SPTBN1/CHMP1B/MAFB/CHMP2B/CAV2/CHMP1A/RCC1/CAV1/ANXA2/FLOT1/CHMP2A	13
BP	GO:0010631	epithelial cell migration	46/1406	366/18903	0.000325894	0.00337148	0.00244143	ANLN/ABL1/PTPN11/ARF6/MAP4K4/HMGB1/ITGB1/CORO1C/RIN2/ADIPOR1/RHOA/EFNB2/NFE2L2/MYH9/CALR/HIF1A/PFN2/ITGA2/AAMP/FERMT1/MET/ADAM9/RAC1/RTN4/ITGA3/SOX9/HSPB1/S100P/PLK2/GLUL/CTSH/JUN/GPI/GADD45A/SNAI2/FSTL1/THBS1/PFN1/GRN/TGFB1/ANXA1/CXCL13/ID1/EFNA1/JUP/CIB1	46
BP	GO:0002833	positive regulation of response to biotic stimulus	28/1406	188/18903	0.00032771	0.00338418	0.00245062	DHX9/PAK2/PRKDC/PARP9/PLSCR1/SFPQ/LSM14A/NONO/PUM2/HMGB1/DDX60/IFI16/XRCC6/XRCC5/HMGB2/HSP90AA1/LAMP1/HLA-E/HSPD1/RIOK3/IRF7/HLA-F/AIM2/IFI35/RPS19/MMP12/HLA-DRB1/GRN	28
BP	GO:0034249	negative regulation of cellular amide metabolic process	38/1406	285/18903	0.000329298	0.00339448	0.00245809	DHX9/HNRNPU/EIF4G1/PATL1/LARP1/CNOT1/SAMD4B/PAIP1/YTHDF2/CAPRIN1/SYNCRIP/KHSRP/DDX3X/TPR/CSDE1/YTHDF1/LSM14A/EIF2AK1/IGF2BP2/EIF4A3/TYMS/HNRNPD/NCL/EIF4EBP2/ILF3/CALR/RTN3/SRP9/POLR2G/ZFP36L1/PRNP/TNKS1BP1/RTN4/SHMT2/ZFP36L2/RPL13A/EIF6/GAPDH	38
BP	GO:0010823	negative regulation of mitochondrion organization	12/1406	52/18903	0.000345643	0.00355631	0.00257527	HUWE1/PSMD10/SLC25A5/TMEM14A/GHITM/TP53/TFRC/BAK1/TSPO/BCL2L1/VAT1/LMNA	12
BP	GO:0051205	protein insertion into membrane	14/1406	67/18903	0.000346233	0.00355631	0.00257527	NMT1/SEC61A1/UBL4A/BAG6/HSP90AA1/HSPA4/CCDC47/TOMM20/TOMM22/PDCD5/EGFR/ROMO1/MAL/TRAM1	14
BP	GO:0010811	positive regulation of cell-substrate adhesion	21/1406	125/18903	0.000347521	0.00356317	0.00258024	ABL1/MAP4K4/RIN2/CALR/CDC42/FERMT1/RAC1/DAG1/ITGA3/POLDIP2/ARPC2/CCR7/FN1/MDK/CRKL/C1QBP/FLNA/P4HB/FBLN2/JUP/CIB1	21
BP	GO:2000117	negative regulation of cysteine-type endopeptidase activity	17/1406	91/18903	0.000348726	0.00356917	0.00258459	PAK2/DDX3X/CSNK2A1/INTS1/IFI16/BIRC5/ARL6IP1/PRDX3/IFI6/RAF1/MAGEA3/CAST/CD44/DHCR24/GPI/THBS1/CST3	17
BP	GO:0071375	cellular response to peptide hormone stimulus	40/1406	306/18903	0.00035142	0.00359036	0.00259993	PRKDC/STAT3/CCNA2/WDTC1/STAT1/YWHAG/PTPN1/GRB2/PTPRA/PTPN11/JAK1/PARP1/NUCKS1/PIP4K2C/SMARCC1/AHCYL1/ADIPOR1/NCL/ZBTB7B/EIF4EBP2/NFE2L2/RAB10/SHC1/RANGAP1/APEX1/CAV2/ZFP36L1/MYO1C/RAB31/CDK4/AGTRAP/GNAI2/SPINK1/CAV1/PKM/IGF2/FBP1/GJB2/ERRFI1/APRT	40
BP	GO:0051348	negative regulation of transferase activity	37/1406	276/18903	0.000352336	0.00359288	0.00260175	ADAR/HNRNPU/DTX3L/PAK2/NUP62/IPO5/SNX6/PLK1/IPO7/YWHAG/DNAJA1/PTPN1/ABL1/PRKAR1A/CDKN1B/PIP4K2C/CORO1C/CDC20/TAF7/CDKN2A/CDKN2B/PLEC/RPS15/TP53/EIF4A2/TNFAIP3/PRDX3/RPS20/NPM1/HSPB1/PPIA/CAV1/GADD45A/RPL37/RPL11/ERRFI1/UCHL1	37
BP	GO:0016311	dephosphorylation	45/1406	357/18903	0.000352917	0.00359288	0.00260175	PPP1R8/PTBP1/SMG5/CTDSP2/IQGAP1/PTPN1/PTPRA/PTPN11/PTPN12/PPP2R5D/PPP2CA/PGAM5/ARPP19/PPP4R1/PPP1CB/CALM3/PPP1R11/PPM1G/HSP90B1/GNA12/CALM2/PPP1CC/PPP6R1/PTPRF/CDC25B/PTP4A1/PPP1R9B/YWHAE/CTDNEP1/HSP90AB1/URI1/YWHAB/ITGA2/PTP4A2/PPP2R1A/CALM1/ENSA/GNAI2/SSH3/PPP1CA/PPIA/FKBP1A/FBP1/TGFB1/PPP4C	45
BP	GO:0001909	leukocyte mediated cytotoxicity	22/1406	134/18903	0.000354725	0.00360491	0.00261047	PLEKHM2/RNF19B/TUBB/TAP2/B2M/LAMP1/KIF5B/MYD88/HLA-E/HLA-B/HPRT1/ARL8B/ICAM1/HLA-A/HLA-F/HLA-DRA/CTSC/FCGR3A/NKG7/CTSH/TUBB4B/HLA-DRB1	22
BP	GO:0006900	vesicle budding from membrane	16/1406	83/18903	0.000356571	0.00361728	0.00261942	SEC23B/CHMP5/GOLPH3/PICALM/RAB7A/TMED10/TFG/RAB1A/TMED2/PEF1/AP2M1/SEC16A/SNX3/ANXA2/TRAPPC6A/TMED9	16
BP	GO:0006090	pyruvate metabolic process	19/1406	108/18903	0.000359261	0.00363815	0.00263453	STAT3/OGDH/PGM1/APP/HIF1A/PGK1/LDHA/GIT1/ENO1/TPI1/PFKP/PGAM1/HK1/ENO2/GPI/PKM/FBP1/EIF6/GAPDH	19
BP	GO:0045860	positive regulation of protein kinase activity	51/1406	420/18903	0.000366023	0.00370011	0.00267941	ECT2/PAK2/ZFP91/MOB1A/DAXX/ADNP/WNK1/IQGAP1/TPX2/DDX3X/PTPN1/ABL1/PSMD10/CKS1B/IRAK1/CAB39/PPP2CA/DVL3/RALB/CDKN1B/CCNB1/CALM3/XRCC6/XRCC5/CALM2/CDC25B/HSP90AA1/RHOA/HSP90AB1/RPLP1/DAZAP2/ADAM9/PRNP/CALM1/DAG1/NPM1/PHB2/EGFR/CCR7/MAGED1/CKS2/JTB/PPIA/CSF1R/IGF2/THBS1/EGR1/TGFB1/EFNA1/AREG/CIB1	51
BP	GO:0002573	myeloid leukocyte differentiation	31/1406	218/18903	0.000372159	0.00375555	0.00271955	HAX1/KLF10/PARP1/EIF2AK1/LBR/GLO1/IFI16/SBNO2/CTNNB1/APP/MYH9/CDC42/MAFB/TFRC/IRF7/ZFP36L1/DHRS2/BATF/CD74/CCR7/ITGB6/C1QC/CSF1R/MYC/JUN/FASN/ANXA2/UBD/HLA-DRB1/TESC/TGFB1	31
BP	GO:1901992	positive regulation of mitotic cell cycle phase transition	18/1406	100/18903	0.000380862	0.00383663	0.00277827	EIF4G1/DLGAP5/TFDP1/RRM1/DDX3X/CDCA5/RCC2/CDK1/CCNB1/APP/CDC25B/RRM2/UBE2C/APEX1/CDK4/PHB2/EGFR/ANXA1	18
BP	GO:0051251	positive regulation of lymphocyte activation	49/1406	400/18903	0.000386407	0.00388569	0.00281379	PRKDC/MSH2/YES1/ACTL6A/ARID1A/ABL1/PTPN11/HMGB1/SMARCC1/CD47/XRCC6/SLC7A1/ZBTB7B/HMCES/B2M/LAMP1/RHOA/EFNB2/HSPH1/MYD88/NCK2/CD276/HLA-E/HSPD1/ACTB/TFRC/HLA-A/HLA-F/SMARCB1/HLA-DRA/SOX4/AXL/HLA-DPA1/CD74/CCR7/FCGR3A/MDK/HLA-DQA1/MMP14/CAV1/HLA-DQA2/IGF2/HLA-DMA/HLA-DRB1/TGFB1/HLA-DPB1/ANXA1/EFNB1/HLA-DQB1	49
BP	GO:0051302	regulation of cell division	28/1406	190/18903	0.000390716	0.00391823	0.00283735	ECT2/RACGAP1/NUP62/PRC1/PLK1/CDCA8/AURKA/KIF20A/WDR5/CALM3/CALM2/BIRC5/CDC25B/RHOA/AURKB/GIT1/CDC42/TP63/CALM1/POLDIP2/PLK2/MDK/MYC/BCL2L1/IGF2/TXNIP/TGFB1/CIB1	28
BP	GO:0090132	epithelium migration	46/1406	369/18903	0.000391006	0.00391823	0.00283735	ANLN/ABL1/PTPN11/ARF6/MAP4K4/HMGB1/ITGB1/CORO1C/RIN2/ADIPOR1/RHOA/EFNB2/NFE2L2/MYH9/CALR/HIF1A/PFN2/ITGA2/AAMP/FERMT1/MET/ADAM9/RAC1/RTN4/ITGA3/SOX9/HSPB1/S100P/PLK2/GLUL/CTSH/JUN/GPI/GADD45A/SNAI2/FSTL1/THBS1/PFN1/GRN/TGFB1/ANXA1/CXCL13/ID1/EFNA1/JUP/CIB1	46
BP	GO:0071496	cellular response to external stimulus	42/1406	328/18903	0.000393427	0.0039337	0.00284855	SNW1/EIF4G1/MTPN/HNRNPL/ADNP/LAMP2/HSPA8/KLF10/HSPA5/PMAIP1/RALB/IFI16/IRF1/SREBF2/RRAGA/PPP1R9B/NFE2L2/PLIN3/MYD88/CDKN2B/PLEC/TP53/SLC7A5/BAK1/ITGA2/WDR45B/DCTPP1/RNF167/BAG3/AXL/COMT/DAG1/SOX9/HNRNPA1/GLUL/CDA/GADD45A/SNAI2/CNN2/SLC38A2/PLIN2/TNFRSF1A	42
BP	GO:0051304	chromosome separation	22/1406	135/18903	0.000394601	0.0039337	0.00284855	DLGAP5/RAD21/PLK1/ACTL6A/CDCA8/TOP2A/ARID1A/TPR/CSNK2A1/PLSCR1/ZWINT/CCNB1/SMARCC1/BIRC5/CDC20/AURKB/PTTG1/UBE2C/ACTB/PPP2R1A/SMARCB1/TOP2B	22
BP	GO:2000779	regulation of double-strand break repair	22/1406	135/18903	0.000394601	0.0039337	0.00284855	DTX3L/DEK/ACTR2/PRKDC/FOXM1/PARP9/UBQLN4/TIMELESS/ACTL6A/ARID1A/PARP1/FUS/SMARCC1/RPA2/MORF4L1/MORF4L2/MAGEF1/ACTB/RMI2/KDM1A/SMARCB1/PPP4C	22
BP	GO:0010644	cell communication by electrical coupling	9/1406	32/18903	0.000396784	0.00394076	0.00285367	ATP1A1/CALM3/CALM2/DBN1/ATP1B1/CALM1/CAV1/GJB2/GJA1	9
BP	GO:0046825	regulation of protein export from nucleus	9/1406	32/18903	0.000396784	0.00394076	0.00285367	XPO1/TPR/PTPN11/ANP32B/UHMK1/YWHAE/RANGAP1/BAG3/IFI27	9
BP	GO:0009410	response to xenobiotic stimulus	52/1406	432/18903	0.000397365	0.00394076	0.00285367	TOP1/STAT1/ABL1/HSPA5/PCNA/OXCT1/CDK1/RPN2/ATP1A1/TYMS/CDKN1B/CTNNB1/MCM7/XRCC5/GNA12/HSP90AA1/RHOA/PPP1R9B/E2F1/NFE2L2/CALR/CTPS1/HSP90AB1/CDH3/TP53/HADHA/TFRC/BAK1/ITGA2/APEX1/PRNP/AIM2/CDK4/ITGA3/TSPO/SOD2/CYBB/AHR/MDK/ABCC1/CRKL/ENO2/MYC/JUN/DAD1/CDH1/TXNIP/THBS1/FBP1/PLIN2/UCHL1/CBR1	52
BP	GO:0017148	negative regulation of translation	35/1406	258/18903	0.000401684	0.00397674	0.00287972	DHX9/HNRNPU/EIF4G1/PATL1/LARP1/CNOT1/SAMD4B/PAIP1/YTHDF2/CAPRIN1/SYNCRIP/KHSRP/DDX3X/TPR/CSDE1/YTHDF1/LSM14A/EIF2AK1/IGF2BP2/EIF4A3/TYMS/HNRNPD/NCL/EIF4EBP2/ILF3/CALR/SRP9/POLR2G/ZFP36L1/TNKS1BP1/SHMT2/ZFP36L2/RPL13A/EIF6/GAPDH	35
BP	GO:0030220	platelet formation	7/1406	20/18903	0.000405541	0.0039943	0.00289244	PRKDC/PTPN11/MYH9/ACTN1/WDR1/ZNF385A/CIB1	7
BP	GO:0035455	response to interferon-alpha	7/1406	20/18903	0.000405541	0.0039943	0.00289244	ADAR/TPR/IFIT3/AXL/IFITM1/IFITM3/BST2	7
BP	GO:0060339	negative regulation of type I interferon-mediated signaling pathway	7/1406	20/18903	0.000405541	0.0039943	0.00289244	ADAR/OAS3/YTHDF2/SAMHD1/STAT2/OAS1/MMP12	7
BP	GO:0031397	negative regulation of protein ubiquitination	16/1406	84/18903	0.000410552	0.00403675	0.00292318	DTX3L/DNAJA1/ABL1/U2AF2/CDC20/IVNS1ABP/RPS15/TNFAIP3/RPS20/SOX4/TSPO/PPIA/CAV1/SQSTM1/RPL37/RPL11	16
BP	GO:0009113	purine nucleobase biosynthetic process	5/1406	10/18903	0.000414829	0.0040511	0.00293357	PRPS1/PAICS/HPRT1/SHMT2/APRT	5
BP	GO:1902412	regulation of mitotic cytokinesis	5/1406	10/18903	0.000414829	0.0040511	0.00293357	NUP62/CDCA8/BIRC5/AURKB/POLDIP2	5
BP	GO:1904896	ESCRT complex disassembly	5/1406	10/18903	0.000414829	0.0040511	0.00293357	CHMP5/CHMP1B/CHMP2B/CHMP1A/CHMP2A	5
BP	GO:1904903	ESCRT III complex disassembly	5/1406	10/18903	0.000414829	0.0040511	0.00293357	CHMP5/CHMP1B/CHMP2B/CHMP1A/CHMP2A	5
BP	GO:0007088	regulation of mitotic nuclear division	20/1406	118/18903	0.000422567	0.00411967	0.00298323	NUP62/DLGAP5/MKI67/PRMT5/RAD21/PLK1/CDCA8/AURKA/NUSAP1/TPR/ZWINT/CCNB1/BIRC5/CDC20/AURKB/CDC42/CAV2/RCC1/FBXW5/IGF2	20
BP	GO:0060333	interferon-gamma-mediated signaling pathway	8/1406	26/18903	0.000426306	0.00414909	0.00300453	PARP9/PARP14/STAT1/JAK1/IRF1/TP53/IFNGR2/IFNGR1	8
BP	GO:0051306	mitotic sister chromatid separation	18/1406	101/18903	0.000431808	0.00418847	0.00303304	DLGAP5/RAD21/PLK1/ACTL6A/CDCA8/ARID1A/TPR/ZWINT/CCNB1/SMARCC1/BIRC5/CDC20/AURKB/PTTG1/UBE2C/ACTB/PPP2R1A/SMARCB1	18
BP	GO:1905477	positive regulation of protein localization to membrane	18/1406	101/18903	0.000431808	0.00418847	0.00303304	NMT1/ATP2C1/ZDHHC5/ARF6/ITGB1/SPTBN1/KIF5B/PPP1R9B/MYO1C/PRNP/ITGA3/PDCD5/EGFR/STOM/RHOG/SQSTM1/EZR/CIB1	18
BP	GO:0043618	regulation of transcription from RNA polymerase II promoter in response to stress	10/1406	39/18903	0.000433439	0.00419721	0.00303937	HSPA5/ATF6B/NFE2L2/HIF1A/NCK2/TP53/TMBIM6/BAG3/JUN/EGR1	10
BP	GO:1903052	positive regulation of proteolysis involved in protein catabolic process	22/1406	136/18903	0.000438339	0.0042316	0.00306428	UBQLN1/PLK1/AURKA/PSMD10/NUB1/VCP/PSMC2/UBQLN2/RNF19B/RAD23A/USP5/BAG6/CDC20/SUMO1/SUMO2/NFE2L2/PSMC3/MAGEF1/CTSC/PSMC4/CAV1/LAPTM5	22
BP	GO:0045089	positive regulation of innate immune response	23/1406	145/18903	0.000438462	0.0042316	0.00306428	DHX9/PAK2/PRKDC/PARP9/PLSCR1/SFPQ/LSM14A/NONO/HMGB1/IFI16/XRCC6/XRCC5/HMGB2/HSP90AA1/LAMP1/HLA-E/RIOK3/IRF7/HLA-F/AIM2/IFI35/RPS19/MMP12	23
BP	GO:0050817	coagulation	32/1406	230/18903	0.000447066	0.00430741	0.00311917	GNA13/PLSCR1/LMAN1/RAP2B/TLN1/GNA12/NFE2L2/MYH9/ANXA5/ACTB/AK3/ACTG1/MYL12A/ITGA2/FZD6/AXL/CLIC1/ST3GAL4/HSPB1/SERPING1/F3/FN1/PPIA/PLAU/FLNA/CAV1/ANXA2/CD59/THBS1/THBD/FCER1G/CD9	32
BP	GO:0045333	cellular respiration	33/1406	240/18903	0.000454968	0.00437621	0.003169	MSH2/VCP/CS/DLST/PUM2/OGDH/CDK1/CCNB1/MDH1/RHOA/STOML2/HIF1A/PLEC/GHITM/UQCRFS1/FH/UQCRC2/CHCHD2/NDUFB10/COX4I1/SHMT2/SOD2/NDUFA1/COX6B1/UQCRQ/CHCHD10/MDH2/COX7C/UQCR10/IDH2/NDUFB7/NDUFS2/COX5B	33
BP	GO:0000054	ribosomal subunit export from nucleus	6/1406	15/18903	0.000466543	0.00445773	0.00322803	XPO1/RAN/ABCE1/RPS15/NPM1/EIF6	6
BP	GO:0033750	ribosome localization	6/1406	15/18903	0.000466543	0.00445773	0.00322803	XPO1/RAN/ABCE1/RPS15/NPM1/EIF6	6
BP	GO:0043518	negative regulation of DNA damage response, signal transduction by p53 class mediator	6/1406	15/18903	0.000466543	0.00445773	0.00322803	PSMD10/KDM1A/CD74/PTTG1IP/CD44/SNAI2	6
BP	GO:0046753	non-lytic viral release	6/1406	15/18903	0.000466543	0.00445773	0.00322803	CHMP5/CHMP1B/ARL8B/CHMP2B/CHMP1A/CHMP2A	6
BP	GO:0051100	negative regulation of binding	25/1406	164/18903	0.000469032	0.00447408	0.00323987	ADNP/AURKA/ATP2A2/SUMO3/RALB/EIF4A3/IFI16/ADAM15/PTPRF/B2M/AURKB/SUMO1/E2F1/PEX19/ACTB/KDM1A/TMBIM6/IFIT1/CTSZ/PPP1CA/JUN/CAV1/NFKBIA/CPNE1/ID1	25
BP	GO:0048041	focal adhesion assembly	16/1406	85/18903	0.000471415	0.00448937	0.00325094	PIP5K1A/ABL1/PTPRA/MAP4K4/RCC2/TLN1/CORO1C/RHOA/ACTG1/ITGA2/ACTN1/RAC1/POLDIP2/MMP14/THBS1/RHOD	16
BP	GO:2001236	regulation of extrinsic apoptotic signaling pathway	24/1406	155/18903	0.00047856	0.00454988	0.00329476	PAK2/PSME3/DDX3X/PMAIP1/CTNNA1/MCL1/HMGB2/ITGAV/TNFSF10/PEA15/ITGA6/ICAM1/TNFAIP3/PDIA3/PPP2R1A/IFI6/RAF1/PPP1CA/CAV1/SNAI2/BCL2L1/MAL/THBS1/LMNA	24
BP	GO:0045739	positive regulation of DNA repair	21/1406	128/18903	0.000482736	0.00458201	0.00331802	DHX9/USP1/DTX3L/ACTR2/PRKDC/FOXM1/PARP9/TIMELESS/ACTL6A/ARID1A/PARP1/HMGB1/PCNA/FUS/SMARCC1/MORF4L1/MORF4L2/TRIM28/ACTB/SMARCB1/EGFR	21
BP	GO:0046605	regulation of centrosome cycle	12/1406	54/18903	0.000500282	0.00474073	0.00343296	XPO1/NUP62/AURKA/CHMP5/CHMP1B/CHMP2B/CHMP1A/FBXW5/NPM1/PLK2/ATF5/CHMP2A	12
BP	GO:1905818	regulation of chromosome separation	19/1406	111/18903	0.00051299	0.00485315	0.00351437	DLGAP5/RAD21/PLK1/ACTL6A/CDCA8/ARID1A/TPR/CSNK2A1/PLSCR1/ZWINT/CCNB1/SMARCC1/BIRC5/CDC20/AURKB/PTTG1/UBE2C/ACTB/SMARCB1	19
BP	GO:0090130	tissue migration	46/1406	374/18903	0.000525713	0.00496536	0.00359562	ANLN/ABL1/PTPN11/ARF6/MAP4K4/HMGB1/ITGB1/CORO1C/RIN2/ADIPOR1/RHOA/EFNB2/NFE2L2/MYH9/CALR/HIF1A/PFN2/ITGA2/AAMP/FERMT1/MET/ADAM9/RAC1/RTN4/ITGA3/SOX9/HSPB1/S100P/PLK2/GLUL/CTSH/JUN/GPI/GADD45A/SNAI2/FSTL1/THBS1/PFN1/GRN/TGFB1/ANXA1/CXCL13/ID1/EFNA1/JUP/CIB1	46
BP	GO:0006984	ER-nucleus signaling pathway	11/1406	47/18903	0.000531809	0.0050147	0.00363135	PTPN1/HSPA5/ATP2A2/SREBF2/ATF6B/ZBTB7B/TMED2/NFE2L2/CCDC47/NCK2/TP53	11
BP	GO:0032886	regulation of microtubule-based process	34/1406	252/18903	0.000533034	0.00501802	0.00363376	XPO1/HNRNPU/CKAP5/DIAPH1/NUP62/DCTN1/PLK1/CKAP2/TPX2/AURKA/TPR/ABL1/DYNC1H1/CHMP5/MAPRE1/CLTC/CDKN1B/CHMP1B/LAMP1/RHOA/GIT1/STMN1/DRG1/CHMP2B/FKBP4/MET/CHMP1A/RAC1/FBXW5/NPM1/PLK2/ATF5/CIB1/CHMP2A	34
BP	GO:0051592	response to calcium ion	23/1406	147/18903	0.000534849	0.00502688	0.00364018	ECT2/ITPR3/IQGAP1/HSPA5/CALM3/AHCYL1/HNRNPD/CALM2/NCSTN/CLIC4/GDI1/PEF1/ACTG1/ADAM9/CALM1/S100A16/JUN/CAV1/TXNIP/THBS1/JUND/CPNE1/SYT8	23
BP	GO:0010762	regulation of fibroblast migration	10/1406	40/18903	0.000539827	0.0050338	0.00364519	GNA13/RCC2/ITGB1/GNA12/CORO1C/MTA2/RAC1/THBS1/TGFB1/SLC9A3R1	10
BP	GO:0030866	cortical actin cytoskeleton organization	10/1406	40/18903	0.000539827	0.0050338	0.00364519	ECT2/RACGAP1/ANLN/ARF6/TLN1/LCP1/CALR/PLEC/EHD2/EZR	10
BP	GO:0140467	integrated stress response signaling	10/1406	40/18903	0.000539827	0.0050338	0.00364519	PTPN1/HSPA5/EIF2AK1/TMED2/NFE2L2/NCK2/MAFB/CREB3/BATF/JUN	10
BP	GO:0032092	positive regulation of protein binding	16/1406	86/18903	0.000539861	0.0050338	0.00364519	DTX3L/ABL1/TRIM21/MAPRE1/PPP2CA/RALB/RAN/APP/B2M/HSP90AB1/POLDIP2/CAV1/ANXA2/FKBP1A/FLOT1/RPL11	16
BP	GO:0007033	vacuole organization	30/1406	213/18903	0.000539961	0.0050338	0.00364519	UBQLN1/MFN2/RAB14/SNAPIN/ATP6V1A/CHMP5/UBQLN2/ATP2A2/RALB/RAB7A/PI4KB/PIP4K2C/RAB1A/TPP1/CHMP1B/ATP6AP2/LAPTM4B/SCARB2/RAB1B/ARL8B/WDR45B/CHMP2B/PPT1/CHMP1A/BAG3/RNF5/ANXA2/GRN/LAPTM5/CHMP2A	30
BP	GO:0070972	protein localization to endoplasmic reticulum	15/1406	78/18903	0.000553589	0.00514417	0.00372511	SRP72/HSPA5/SEC61A1/SSR3/UBL4A/BAG6/RAB10/SRP9/KDELR2/SEC16A/OS9/RTN4/GPAA1/KDELR1/TRAM1	15
BP	GO:1903533	regulation of protein targeting	15/1406	78/18903	0.000553589	0.00514417	0.00372511	HUWE1/HAX1/LMAN1/SAE1/UBE2D3/SREBF2/GDI1/MYO1C/PRNP/BAG3/PDCD5/RAC2/STOM/UBL5/CIB1	15
BP	GO:0070199	establishment of protein localization to chromosome	8/1406	27/18903	0.000566624	0.00524835	0.00380055	DKC1/CCT5/CCT3/TCP1/CCT6A/CCT8/CCT4/CCT7	8
BP	GO:2000737	negative regulation of stem cell differentiation	8/1406	27/18903	0.000566624	0.00524835	0.00380055	HNRNPU/STAT3/YTHDF2/NELFB/NFE2L2/HSPA9/JAG1/ZFP36L2	8
BP	GO:0031032	actomyosin structure organization	29/1406	204/18903	0.000568735	0.00525791	0.00380747	ECT2/PAK2/RACGAP1/CDC42BPB/ANLN/ABL1/ITGB1/PRKAR1A/WASF2/TNFAIP1/FLII/CD47/RHOA/MYH9/CDC42/PLEC/STMN1/PFN2/ACTG1/CNN3/MET/RAC1/WDR1/ZYX/ITGB5/RHOC/CNN2/PFN1/KRT19	29
BP	GO:0043555	regulation of translation in response to stress	7/1406	21/18903	0.000569485	0.00525791	0.00380747	EIF4G1/DDX3X/EIF2AK1/TMED2/NCK2/NPM1/PPP1CA	7
BP	GO:0002687	positive regulation of leukocyte migration	23/1406	148/18903	0.000589621	0.0054351	0.00393578	WNK1/ABL1/AKIRIN1/HMGB1/CD47/APP/RHOA/CALR/CREB3/ICAM1/ITGA2/RAC1/CXCL10/CD74/CCR7/MDK/RAC2/MMP14/CSF1R/C1QBP/THBS1/CXCL13/CCL20	23
BP	GO:0042542	response to hydrogen peroxide	21/1406	130/18903	0.000596467	0.0054894	0.00397511	ECT2/STAT1/ABL1/PCNA/CDK1/CAPN2/NFE2L2/SIGMAR1/BAK1/TNFAIP3/APEX1/PRDX3/MET/ADAM9/AXL/OSER1/SOD2/NET1/TXNIP/ANXA1/AREG	21
BP	GO:0001503	ossification	51/1406	429/18903	0.000600045	0.00551351	0.00399256	ADAR/SNRNP200/DHX9/HNRNPU/HNRNPC/RBMX/SYNCRIP/DDX21/PTPN11/PSMC2/EXT2/KLF10/CLTC/SND1/SBNO2/CTNNB1/RHOA/CCDC47/HIF1A/RRBP1/GIT1/SBDS/RPS15/ALYREF/DDX5/TUFT1/TP63/OSTF1/JAG1/TPM4/RSL1D1/CLIC1/ZMPSTE24/IFITM1/TNC/SOX9/RPL38/EGFR/MDK/MMP14/SOX2/SNAI2/FASN/SRGN/IGF2/COL5A2/JUND/TGFB1/IGFBP3/FGFR3/AREG	51
BP	GO:0030433	ubiquitin-dependent ERAD pathway	16/1406	87/18903	0.000616643	0.00565698	0.00409646	UBQLN1/USP14/CANX/VCP/UBXN4/HSPA5/UBQLN2/BAG6/HSP90B1/NFE2L2/CALR/CCDC47/STT3B/OS9/RNF5/CAV1	16
BP	GO:2001244	positive regulation of intrinsic apoptotic signaling pathway	13/1406	63/18903	0.000632839	0.00579632	0.00419736	SFPQ/PMAIP1/MCL1/NCK2/TP53/SERINC3/EIF5A/MYC/CAV1/PLEKHF1/RPL11/SLC9A3R1/RPL26	13
BP	GO:0035305	negative regulation of dephosphorylation	11/1406	48/18903	0.000644153	0.00588206	0.00425945	PPP1R8/IQGAP1/ARPP19/PPP1R11/PPP1R9B/YWHAE/URI1/YWHAB/ENSA/GNAI2/FKBP1A	11
BP	GO:0032922	circadian regulation of gene expression	14/1406	71/18903	0.000644246	0.00588206	0.00425945	HNRNPU/HUWE1/TOP1/PRMT5/PPP1CB/HDAC1/PPP1CC/AHR/BHLHE40/MAGED1/PPP1CA/NAMPT/EGR1/ID1	14
BP	GO:0035308	negative regulation of protein dephosphorylation	9/1406	34/18903	0.000648184	0.00589929	0.00427192	PPP1R8/ARPP19/PPP1R11/PPP1R9B/YWHAE/YWHAB/ENSA/GNAI2/FKBP1A	9
BP	GO:0039528	cytoplasmic pattern recognition receptor signaling pathway in response to virus	9/1406	34/18903	0.000648184	0.00589929	0.00427192	OAS3/IFIH1/LSM14A/PUM2/DDX60/RIOK3/IRF7/PHB2/C1QBP	9
BP	GO:0006458	'de novo' protein folding	10/1406	41/18903	0.000666942	0.00606043	0.00438861	HSPA8/PTGES3/HSPA5/HSPH1/HSPA9/HSPD1/DNAJB1/ST13/CD74/FKBP1A	10
BP	GO:0036294	cellular response to decreased oxygen levels	24/1406	159/18903	0.000696507	0.0063191	0.00457592	UBQLN1/CCNA2/HP1BP3/IRAK1/HYOU1/PMAIP1/CDKN1B/E2F1/NFE2L2/HIF1A/PGK1/ENO1/TP53/ZFP36L1/TMBIM6/CHCHD2/PHB2/CYBB/MYC/P4HB/EGR1/JUND/NDRG1/LMNA	24
BP	GO:0001732	formation of cytoplasmic translation initiation complex	6/1406	16/18903	0.000699681	0.00632793	0.00458232	EIF3A/EIF5/EIF2S2/EIF3B/EIF3L/EIF3I	6
BP	GO:0034085	establishment of sister chromatid cohesion	6/1406	16/18903	0.000699681	0.00632793	0.00458232	SMC1A/SMC3/STAG2/RAD21/NAA50/CDCA5	6
BP	GO:0030522	intracellular receptor signaling pathway	35/1406	266/18903	0.000707543	0.00638694	0.00462505	SNW1/OAS3/STAT3/CNOT1/DAXX/ARID1A/DNAJA1/IFIH1/PARP1/PTGES3/LSM14A/PUM2/DDX60/YWHAH/NCOA4/HDAC1/TAF7/RHOA/CALR/ACTN4/DDX5/RIOK3/KDM1A/DDX17/TNFAIP3/TP63/IRF7/FKBP4/PHB2/AHR/CRKL/C1QBP/PMEPA1/SNAI2/NFKBIA	35
BP	GO:0031503	protein-containing complex localization	26/1406	178/18903	0.000709646	0.00638694	0.00462505	XPO1/HNRNPU/LMNB1/LMNB2/STAU1/SFPQ/SNAPIN/AP2B1/RCC2/RALB/RAN/CLSTN1/BIRC5/KIF5B/ABCE1/EFNB2/RPS15/AP2M1/FKBP4/DBN1/DYNLL1/DAG1/NPM1/EIF6/LMNA/EZR	26
BP	GO:0051256	mitotic spindle midzone assembly	5/1406	11/18903	0.000713979	0.00638694	0.00462505	RACGAP1/PRC1/CDCA8/BIRC5/AURKB	5
BP	GO:0051469	vesicle fusion with vacuole	5/1406	11/18903	0.000713979	0.00638694	0.00462505	CHMP5/CHMP1B/CHMP2B/CHMP1A/CHMP2A	5
BP	GO:0061763	multivesicular body-lysosome fusion	5/1406	11/18903	0.000713979	0.00638694	0.00462505	CHMP5/CHMP1B/CHMP2B/CHMP1A/CHMP2A	5
BP	GO:2000622	regulation of nuclear-transcribed mRNA catabolic process, nonsense-mediated decay	5/1406	11/18903	0.000713979	0.00638694	0.00462505	EIF4A3/CASC3/HNRNPAB/RBM8A/MAGOH	5
BP	GO:2000644	regulation of receptor catabolic process	5/1406	11/18903	0.000713979	0.00638694	0.00462505	DTX3L/PTPN1/FURIN/ANXA2/LAPTM5	5
BP	GO:0031349	positive regulation of defense response	39/1406	307/18903	0.000727267	0.00649572	0.00470382	DHX9/PAK2/PRKDC/PARP9/PLSCR1/SFPQ/LSM14A/NONO/HMGB1/IFI16/CD47/XRCC6/XRCC5/APP/HMGB2/HSP90AA1/LAMP1/OSMR/OPTN/HLA-E/TNIP1/RIOK3/ITGA2/MGST2/IRF7/HLA-F/AIM2/CTSC/IFI35/CCR7/MDK/ABCC1/NKG7/RPS19/MMP12/NFKBIA/GRN/TNFRSF1A/IDO1	39
BP	GO:0022612	gland morphogenesis	20/1406	123/18903	0.000731302	0.00652163	0.00472258	PLXNA1/MSN/TNFAIP3/TP63/DAG1/PHB2/TNC/DDR1/SOX9/EGFR/MDK/CAPN1/CSF1R/CAV1/SNAI2/TBX2/SERPINB5/TGFB1/SLC9A3R1/AREG	20
BP	GO:0000768	syncytium formation by plasma membrane fusion	13/1406	64/18903	0.000740924	0.00658661	0.00476964	ITGB1/SBNO2/PTGFRN/CAPN2/MYH9/CXCL9/ADAM9/CXCL10/EHD2/MYOF/CD53/FLOT1/CD9	13
BP	GO:0140253	cell-cell fusion	13/1406	64/18903	0.000740924	0.00658661	0.00476964	ITGB1/SBNO2/PTGFRN/CAPN2/MYH9/CXCL9/ADAM9/CXCL10/EHD2/MYOF/CD53/FLOT1/CD9	13
BP	GO:0051647	nucleus localization	8/1406	28/18903	0.000742024	0.00658661	0.00476964	DCTN1/LMNB1/LMNB2/DYNC1H1/CDC42/SUN2/SLC9A3R1/LMNA	8
BP	GO:0010569	regulation of double-strand break repair via homologous recombination	14/1406	72/18903	0.000745919	0.00661098	0.00478728	ACTR2/UBQLN4/TIMELESS/ACTL6A/PARP1/FUS/RPA2/MORF4L1/MORF4L2/MAGEF1/ACTB/RMI2/KDM1A/PPP4C	14
BP	GO:0033002	muscle cell proliferation	33/1406	247/18903	0.000758933	0.00671598	0.00486332	DNMT1/SF1/PRKDC/STAT1/MFN2/ABL1/GNA13/IRAK1/AKIRIN1/JARID2/PRKAR1A/CDK1/CDKN1B/CTNNB1/XRCC6/XRCC5/GNA12/HDAC1/RHOA/MYD88/ITGA2/TNFAIP3/CAV2/POLDIP2/SOD2/NOTCH3/GNAI2/JUN/TBX2/THBS1/TGFB1/IGFBP3/GJA1	33
BP	GO:0048659	smooth muscle cell proliferation	26/1406	179/18903	0.000772821	0.00682837	0.00494471	DNMT1/SF1/PRKDC/STAT1/MFN2/GNA13/IRAK1/CDKN1B/CTNNB1/XRCC6/XRCC5/GNA12/HDAC1/RHOA/MYD88/ITGA2/TNFAIP3/POLDIP2/SOD2/NOTCH3/GNAI2/JUN/THBS1/TGFB1/IGFBP3/GJA1	26
BP	GO:0007162	negative regulation of cell adhesion	39/1406	308/18903	0.000774482	0.00683159	0.00494704	WNK1/YTHDF2/ABL1/PTPN11/MAP4K4/RCC2/HMGB1/PRKAR1A/GBP1/PLXNA1/ADAM15/IRF1/CORO1C/ZBTB7B/RHOA/ACTN4/CDKN2A/ARHGDIA/PRNP/PLA2G2F/JAG1/CD74/MDK/MMP14/TGFBI/CD164/SNAI2/PLXNB2/CDH1/MMP12/THBS1/HLA-DRB1/VSIG4/TGFB1/EPCAM/ANXA1/LAPTM5/IDO1/CD9	39
BP	GO:0033628	regulation of cell adhesion mediated by integrin	11/1406	49/18903	0.000775561	0.00683159	0.00494704	WNK1/PTPN11/FERMT1/ADAM9/CRKL/PLAU/SNAI2/TESC/CXCL13/EFNA1/CIB1	11
BP	GO:0030705	cytoskeleton-dependent intracellular transport	29/1406	208/18903	0.000781336	0.00683597	0.00495021	HNRNPU/TUBA1B/HSPA8/TUBA1C/STAU1/SFPQ/SNAPIN/DYNC1H1/TUBB/APP/MYO1B/RAB1A/LAMP1/MYO1D/KIF5B/KIF1C/ACTN4/RAB6A/HIF1A/CDC42/COPG1/ARL8B/MYO1C/BAG3/SUN2/DYNLL1/HSPB1/TUBA1A/UCHL1	29
BP	GO:0032869	cellular response to insulin stimulus	29/1406	208/18903	0.000781336	0.00683597	0.00495021	PRKDC/WDTC1/STAT1/YWHAG/PTPN1/GRB2/PTPRA/PTPN11/PARP1/NUCKS1/PIP4K2C/SMARCC1/ADIPOR1/NCL/ZBTB7B/EIF4EBP2/RAB10/SHC1/CAV2/ZFP36L1/MYO1C/RAB31/CDK4/GNAI2/PKM/IGF2/FBP1/ERRFI1/APRT	29
BP	GO:0036344	platelet morphogenesis	7/1406	22/18903	0.000782001	0.00683597	0.00495021	PRKDC/PTPN11/MYH9/ACTN1/WDR1/ZNF385A/CIB1	7
BP	GO:0051444	negative regulation of ubiquitin-protein transferase activity	7/1406	22/18903	0.000782001	0.00683597	0.00495021	DTX3L/ABL1/CDC20/RPS15/RPS20/RPL37/RPL11	7
BP	GO:1902774	late endosome to lysosome transport	7/1406	22/18903	0.000782001	0.00683597	0.00495021	SNAPIN/CHMP5/CHMP1B/ARL8B/CHMP2B/CHMP1A/CHMP2A	7
BP	GO:0071478	cellular response to radiation	27/1406	189/18903	0.000802099	0.00700102	0.00506973	ECT2/NMT1/DDB1/GRB2/PARP1/NUCKS1/HSPA5/PCNA/IFI16/XRCC6/XRCC5/AURKB/TMEM109/TP53/KDM1A/BAK1/TNKS1BP1/ZMPSTE24/NPM1/NET1/ITGB6/MYC/GADD45A/SNAI2/BCL2L1/EGR1/RPL26	27
BP	GO:0016072	rRNA metabolic process	35/1406	268/18903	0.00081051	0.00706372	0.00511513	XRN2/PRKDC/WBP11/SPIN1/YTHDF2/DDX21/DKC1/EIF4A3/NOLC1/NCL/NOP56/RPS28/SBDS/RPS15/TP53/RIOK3/RPL14/GTF3C5/PES1/TSR2/DDX17/SMARCB1/RSL1D1/RPS24/RPS8/RPS25/RPS14/RPS19/EIF6/RPL11/RPS21/RPL26/RPL27/RPL35/RPS6	35
BP	GO:0010965	regulation of mitotic sister chromatid separation	17/1406	98/18903	0.000847149	0.00737187	0.00533828	DLGAP5/RAD21/PLK1/ACTL6A/CDCA8/ARID1A/TPR/ZWINT/CCNB1/SMARCC1/BIRC5/CDC20/AURKB/PTTG1/UBE2C/ACTB/SMARCB1	17
BP	GO:0032868	response to insulin	35/1406	269/18903	0.000866769	0.0075312	0.00545366	PRKDC/WDTC1/STAT1/YWHAG/PTPN1/GRB2/PTPRA/PTPN11/PARP1/NUCKS1/PIP4K2C/SMARCC1/SRSF4/ADIPOR1/NCL/ZBTB7B/EIF4EBP2/RAB10/SHC1/TNFSF10/HADHA/CAV2/ZFP36L1/MYO1C/RAB31/CDK4/GNAI2/PKM/IGF2/SRSF6/FBP1/EGR1/EIF6/ERRFI1/APRT	35
BP	GO:0030518	intracellular steroid hormone receptor signaling pathway	19/1406	116/18903	0.000896073	0.00777407	0.00562953	CNOT1/DAXX/ARID1A/DNAJA1/PARP1/PTGES3/YWHAH/NCOA4/HDAC1/TAF7/RHOA/CALR/DDX5/KDM1A/DDX17/TP63/FKBP4/PHB2/PMEPA1	19
BP	GO:0051262	protein tetramerization	16/1406	90/18903	0.000905343	0.00784267	0.00567921	CPSF7/RRM1/NUDT21/SAMHD1/FARSA/B2M/RRM2/ALDH9A1/TP53/HPRT1/TK1/TP63/SHMT2/SOD2/HLA-DRB1/HSD17B10	16
BP	GO:0007520	myoblast fusion	11/1406	50/18903	0.000928448	0.00801867	0.00580665	ITGB1/PTGFRN/CAPN2/MYH9/CXCL9/CXCL10/EHD2/MYOF/CD53/FLOT1/CD9	11
BP	GO:2001238	positive regulation of extrinsic apoptotic signaling pathway	11/1406	50/18903	0.000928448	0.00801867	0.00580665	PAK2/PMAIP1/CTNNA1/TNFSF10/PEA15/PDIA3/PPP2R1A/PPP1CA/CAV1/MAL/THBS1	11
BP	GO:0010770	positive regulation of cell morphogenesis involved in differentiation	15/1406	82/18903	0.000954939	0.00823509	0.00596338	ACTR2/PRKDC/CAPRIN1/ABL1/CALR/CDC42/RAC1/DBN1/ARPC2/MDK/CRKL/C1QBP/FLNA/P4HB/CIB1	15
BP	GO:0010458	exit from mitosis	8/1406	29/18903	0.000958568	0.00824168	0.00596814	ANLN/CDCA5/CDKN1B/PPP1R9B/UBE2C/RPL24/PHB2/CHMP2A	8
BP	GO:0010800	positive regulation of peptidyl-threonine phosphorylation	8/1406	29/18903	0.000958568	0.00824168	0.00596814	PLK1/CAB39/CALM3/APP/CALM2/CALM1/TNKS1BP1/TGFB1	8
BP	GO:0007098	centrosome cycle	21/1406	135/18903	0.0009873	0.00847604	0.00613786	XPO1/CKAP5/NUP62/DCTN1/KIF11/PLK1/AURKA/CHMP5/CDK1/CTNNB1/CDK2/CHMP1B/SLC16A1/CHMP2B/CHMP1A/FBXW5/NPM1/PLK2/ATF5/GADD45A/CHMP2A	21
BP	GO:0050688	regulation of defense response to virus	14/1406	74/18903	0.000990288	0.00848902	0.00614726	DHX9/DTX3L/PARP9/STAT1/RNF26/HSP90AA1/PCBP2/RIOK3/TNFAIP3/AIM2/IFIT1/ZMPSTE24/C1QBP/MMP12	14
BP	GO:0006356	regulation of transcription by RNA polymerase I	10/1406	43/18903	0.000995491	0.00850827	0.00616119	BAZ1B/DEK/DDX21/SMARCA5/SF3B1/NCL/SMARCB1/ZMPSTE24/MAF1/FLNA	10
BP	GO:0009124	nucleoside monophosphate biosynthetic process	10/1406	43/18903	0.000995491	0.00850827	0.00616119	PRPS1/TYMS/CMPK1/PRPS2/PAICS/HPRT1/TK1/IMPDH1/CDA/APRT	10
BP	GO:0002685	regulation of leukocyte migration	31/1406	231/18903	0.00100216	0.00855257	0.00619327	WNK1/ABL1/AKIRIN1/HMGB1/CD47/APP/RHOA/CALR/MYD88/MSN/CREB3/ICAM1/ITGA2/RAC1/CXCL10/ST3GAL4/CD74/CCR7/MDK/RAC2/CRKL/MMP14/CSF1R/RHOG/C1QBP/CNN2/THBS1/ANXA1/CXCL13/CCL20/CD9	31
BP	GO:0016049	cell growth	56/1406	493/18903	0.00100386	0.00855436	0.00619457	EIF4G1/MTPN/ADNP/EIF4G2/IQGAP1/AURKA/DDX3X/ABL1/CSNK2A1/PSMD10/RBBP7/ITGB1/PPP2CA/PLXNA1/CDKN1B/CTNNB1/CLSTN1/APP/ADAM15/ADIPOR1/HSP90AA1/SDCBP/RHOA/PPP1R9B/CDKN2A/GDI1/CDC42/ENO1/HSP90AB1/URI1/TP53/PPT1/PPP2R1A/DBN1/CXCL16/RTN4/NPM1/TNC/DDR1/ALCAM/SOX9/EGFR/NET1/FN1/CRKL/MMP14/BST2/CDA/CDH1/IGFBP4/FBP1/TGFB1/IGFBP3/CPNE1/GJA1/CIB1	56
BP	GO:0007096	regulation of exit from mitosis	6/1406	17/18903	0.00101365	0.00859961	0.00622734	ANLN/CDCA5/CDKN1B/PPP1R9B/UBE2C/PHB2	6
BP	GO:0032510	endosome to lysosome transport via multivesicular body sorting pathway	6/1406	17/18903	0.00101365	0.00859961	0.00622734	VCP/CHMP5/CHMP1B/CHMP2B/CHMP1A/CHMP2A	6
BP	GO:1902165	regulation of intrinsic apoptotic signaling pathway in response to DNA damage by p53 class mediator	6/1406	17/18903	0.00101365	0.00859961	0.00622734	HNRNPK/KDM1A/CD74/CD44/ZNF385A/RPL26	6
BP	GO:0002696	positive regulation of leukocyte activation	52/1406	450/18903	0.00102097	0.00864896	0.00626308	PRKDC/MSH2/YES1/ACTL6A/ARID1A/ABL1/PTPN11/HMGB1/SMARCC1/CD47/XRCC6/SLC7A1/ZBTB7B/HMCES/B2M/LAMP1/RHOA/EFNB2/HSPH1/MYD88/NCK2/CD276/HLA-E/HSPD1/ACTB/TFRC/HLA-A/HLA-F/SMARCB1/HLA-DRA/SOX4/AXL/CTSC/HLA-DPA1/CD74/CCR7/FCGR3A/MDK/HLA-DQA1/MMP14/CAV1/HLA-DQA2/IGF2/HLA-DMA/THBS1/HLA-DRB1/JUND/TGFB1/HLA-DPB1/ANXA1/EFNB1/HLA-DQB1	52
BP	GO:0006353	DNA-templated transcription termination	7/1406	23/18903	0.00105256	0.00889034	0.00643787	DHX9/XRN2/PRMT5/MAZ/WDR82/POLR2A/ZMPSTE24	7
BP	GO:0032727	positive regulation of interferon-alpha production	7/1406	23/18903	0.00105256	0.00889034	0.00643787	DHX9/STAT1/DDX3X/IFIH1/HSPD1/IRF7/MMP12	7
BP	GO:0036473	cell death in response to oxidative stress	17/1406	100/18903	0.00107053	0.00901562	0.00652859	UBQLN1/MELK/ABL1/SFPQ/PARP1/NONO/CTNNB1/MCL1/NFE2L2/HIF1A/SIGMAR1/ZNF622/MET/SOD2/HSPB1/PPIA/P4HB	17
BP	GO:1990830	cellular response to leukemia inhibitory factor	17/1406	100/18903	0.00107053	0.00901562	0.00652859	HNRNPU/SRSF3/SRSF7/JARID2/SMARCA5/MAT2A/SBNO2/XRCC5/NCL/MYBL2/CACYBP/PFKP/EIF4A2/TFRC/ICAM1/BCAT2/MRPL15	17
BP	GO:0001913	T cell mediated cytotoxicity	11/1406	51/18903	0.00110542	0.00929511	0.00673098	TAP2/B2M/HLA-E/HLA-B/HPRT1/HLA-A/HLA-F/HLA-DRA/CTSC/CTSH/HLA-DRB1	11
BP	GO:1901800	positive regulation of proteasomal protein catabolic process	19/1406	118/18903	0.00110695	0.00929511	0.00673098	UBQLN1/PLK1/AURKA/PSMD10/NUB1/VCP/PSMC2/UBQLN2/RNF19B/RAD23A/USP5/BAG6/CDC20/SUMO1/SUMO2/NFE2L2/PSMC3/PSMC4/CAV1	19
BP	GO:0045661	regulation of myoblast differentiation	14/1406	75/18903	0.00113573	0.00952294	0.00689596	ACTL6A/ARID1A/AKIRIN1/SMARCC1/ACTB/LRRC8A/CXCL9/ZFP36L1/SMARCB1/SOX4/CXCL10/SOX9/TGFB1/IGFBP3	14
BP	GO:0000022	mitotic spindle elongation	5/1406	12/18903	0.00114921	0.00953861	0.0069073	RACGAP1/PRC1/CDCA8/BIRC5/AURKB	5
BP	GO:0002424	T cell mediated immune response to tumor cell	5/1406	12/18903	0.00114921	0.00953861	0.0069073	HMGB1/HSPD1/HLA-A/AHR/HLA-DRB1	5
BP	GO:0008298	intracellular mRNA localization	5/1406	12/18903	0.00114921	0.00953861	0.0069073	STAU1/CASC3/HNRNPAB/ZFP36L1/ZNF385A	5
BP	GO:0043589	skin morphogenesis	5/1406	12/18903	0.00114921	0.00953861	0.0069073	ITGA6/ITGA2/TP63/ITGB4/ERRFI1	5
BP	GO:0071635	negative regulation of transforming growth factor beta production	5/1406	12/18903	0.00114921	0.00953861	0.0069073	LAPTM4B/HSP90AB1/CDH3/FN1/FURIN	5
BP	GO:0090435	protein localization to nuclear envelope	5/1406	12/18903	0.00114921	0.00953861	0.0069073	PLK1/LMNB1/LMNB2/SUMO1/LMNA	5
BP	GO:0097576	vacuole fusion	5/1406	12/18903	0.00114921	0.00953861	0.0069073	CHMP5/CHMP1B/CHMP2B/CHMP1A/CHMP2A	5
BP	GO:0030071	regulation of mitotic metaphase/anaphase transition	16/1406	92/18903	0.00115576	0.00955762	0.00692107	DLGAP5/RAD21/PLK1/ACTL6A/CDCA8/ARID1A/TPR/ZWINT/CCNB1/SMARCC1/BIRC5/CDC20/AURKB/UBE2C/ACTB/SMARCB1	16
BP	GO:0051653	spindle localization	12/1406	59/18903	0.00115649	0.00955762	0.00692107	KPNB1/ACTR2/DCTN1/ACTR3/PLK1/NUSAP1/DYNC1H1/MAPRE1/ITGB1/MYH9/CFL1/GJA1	12
BP	GO:0097352	autophagosome maturation	12/1406	59/18903	0.00115649	0.00955762	0.00692107	UBQLN1/UBQLN4/LAMP2/VCP/SNAPIN/CHMP5/ATP2A2/CHMP1B/CHMP2B/CHMP1A/CALM1/CHMP2A	12
BP	GO:0031333	negative regulation of protein-containing complex assembly	22/1406	146/18903	0.00116603	0.00962269	0.00696819	MTPN/CAPZA1/DDX3X/SPTAN1/HSPA5/MAPRE1/HMGB1/FLII/SPTBN1/TWF1/CDC42/STMN1/PFN2/RIOK3/FKBP4/RAF1/SOX9/SSH3/RPL13A/PMEPA1/CAPZB/PFN1	22
BP	GO:1903322	positive regulation of protein modification by small protein conjugation or removal	21/1406	137/18903	0.0011964	0.00985916	0.00713943	HUWE1/UBQLN1/PLK1/DDX3X/PSMD10/VCP/UBA2/HSPA5/SAE1/CDC20/PEF1/UBE2C/TNIP1/KDM1A/ARRDC3/RPS2/NPM1/PTTG1IP/CAV1/FKBP1A/LAPTM5	21
BP	GO:1990823	response to leukemia inhibitory factor	17/1406	101/18903	0.00119979	0.00986228	0.00714169	HNRNPU/SRSF3/SRSF7/JARID2/SMARCA5/MAT2A/SBNO2/XRCC5/NCL/MYBL2/CACYBP/PFKP/EIF4A2/TFRC/ICAM1/BCAT2/MRPL15	17
BP	GO:0045663	positive regulation of myoblast differentiation	10/1406	44/18903	0.00120364	0.00986228	0.00714169	ACTL6A/ARID1A/AKIRIN1/SMARCC1/ACTB/LRRC8A/CXCL9/SMARCB1/SOX4/IGFBP3	10
BP	GO:0071763	nuclear membrane organization	10/1406	44/18903	0.00120364	0.00986228	0.00714169	DCTN1/PLK1/CHMP5/CHMP1B/CTDNEP1/CHMP2B/TMEM43/CHMP1A/RCC1/CHMP2A	10
BP	GO:1903214	regulation of protein targeting to mitochondrion	10/1406	44/18903	0.00120364	0.00986228	0.00714169	HUWE1/HAX1/LMAN1/SAE1/UBE2D3/SREBF2/BAG3/PDCD5/RAC2/UBL5	10
BP	GO:0031056	regulation of histone modification	25/1406	175/18903	0.00122897	0.0100413	0.00727131	HCFC1/BAZ1B/DEK/DNMT1/SNW1/CTCF/PYGO2/DDX21/SET/JARID2/WDR5/SMARCA5/CTNNB1/SF3B1/ZBTB7B/TAF7/TP53/KDM1A/PAF1/SMARCB1/NELFE/ZMPSTE24/SNAI2/IGF2/LMNA	25
BP	GO:0048660	regulation of smooth muscle cell proliferation	25/1406	175/18903	0.00122897	0.0100413	0.00727131	DNMT1/SF1/PRKDC/STAT1/MFN2/GNA13/IRAK1/CDKN1B/CTNNB1/XRCC6/XRCC5/GNA12/HDAC1/RHOA/MYD88/ITGA2/TNFAIP3/SOD2/NOTCH3/GNAI2/JUN/THBS1/TGFB1/IGFBP3/GJA1	25
BP	GO:0050679	positive regulation of epithelial cell proliferation	30/1406	224/18903	0.00123737	0.0100956	0.00731062	NRAS/STAT3/HMGB1/CTNNB1/LAMC1/HMGB2/HIF1A/CDC42/B4GALT1/CDH3/TNFAIP3/TP63/CAV2/RTN4/SOX9/EGFR/LAMB1/F3/MDK/CLDN1/SPINK1/GLUL/MYC/JUN/IGF2/MMP12/SRSF6/GRN/ID1/AREG	30
BP	GO:0022616	DNA strand elongation	9/1406	37/18903	0.00125584	0.0102317	0.00740923	MCM4/ACTL6A/POLE3/NUCKS1/MCM3/PCNA/MCM7/RFC4/POLD2	9
BP	GO:0006119	oxidative phosphorylation	22/1406	147/18903	0.00127712	0.0103904	0.0075241	MSH2/VCP/CDK1/CCNB1/RHOA/STOML2/GHITM/UQCRFS1/UQCRC2/CHCHD2/NDUFB10/COX4I1/SHMT2/NDUFA1/COX6B1/UQCRQ/CHCHD10/COX7C/UQCR10/NDUFB7/NDUFS2/COX5B	22
BP	GO:0048872	homeostasis of number of cells	37/1406	296/18903	0.00131729	0.010702	0.00774978	ADAR/UBAP2L/PRKDC/STAT3/STAT1/ABL1/PTPN11/PTBP3/HMGB1/SLC25A5/PMAIP1/CCNB2/NCSTN/HMGB2/B2M/HIF1A/HSPA9/MAFB/FH/BAK1/TNFAIP3/ZFP36L1/DNASE2/SOX4/AXL/TMEM14C/RPS24/SOX9/CD74/CCR7/GPI/RPS14/RPS19/FSTL1/ANXA1/SLC40A1/RPS6	37
BP	GO:0000288	nuclear-transcribed mRNA catabolic process, deadenylation-dependent decay	13/1406	68/18903	0.00134103	0.0108617	0.00786538	DHX9/HNRNPU/PATL1/CNOT1/SAMD4B/PAIP1/SYNCRIP/CSDE1/HNRNPD/POLR2G/ZFP36L1/TNKS1BP1/ZFP36L2	13
BP	GO:0006949	syncytium formation	13/1406	68/18903	0.00134103	0.0108617	0.00786538	ITGB1/SBNO2/PTGFRN/CAPN2/MYH9/CXCL9/ADAM9/CXCL10/EHD2/MYOF/CD53/FLOT1/CD9	13
BP	GO:0007041	lysosomal transport	20/1406	129/18903	0.0013426	0.0108617	0.00786538	DTX3L/M6PR/LAMP2/HSPA8/VCP/SNAPIN/CHMP5/RAB7A/NCOA4/CHMP1B/LAMP1/SCARB2/ARL8B/CHMP2B/CHMP1A/PSAP/PLEKHF1/GRN/LAPTM5/CHMP2A	20
BP	GO:0046686	response to cadmium ion	12/1406	60/18903	0.00134943	0.0109016	0.00789429	DAXX/PCNA/CDK1/CDKN1B/SUMO1/PRNP/SOD2/CYBB/EGFR/GSS/JUN/GPI	12
BP	GO:0050867	positive regulation of cell activation	53/1406	467/18903	0.00137761	0.0111136	0.00804783	PRKDC/MSH2/YES1/ACTL6A/ARID1A/ABL1/PTPN11/HMGB1/SMARCC1/CD47/XRCC6/SLC7A1/ZBTB7B/HMCES/B2M/LAMP1/RHOA/EFNB2/HSPH1/MYD88/NCK2/CD276/HLA-E/HSPD1/ACTB/TFRC/HLA-A/HLA-F/SMARCB1/HLA-DRA/SOX4/AXL/CTSC/HLA-DPA1/CD74/CCR7/FCGR3A/MDK/HLA-DQA1/MMP14/FLNA/CAV1/HLA-DQA2/IGF2/HLA-DMA/THBS1/HLA-DRB1/JUND/TGFB1/HLA-DPB1/ANXA1/EFNB1/HLA-DQB1	53
BP	GO:1903706	regulation of hemopoiesis	48/1406	413/18903	0.00138497	0.0111573	0.00807948	PRKDC/STAT3/ACTL6A/STAT1/HAX1/ARID1A/ABL1/KLF10/HMGB1/SMARCC1/CTNNB1/XRCC6/IRF1/ZBTB7B/HMGB2/B2M/RHOA/HIF1A/HSPA9/CLPTM1/MAFB/ACTB/HLA-B/PAF1/IRF7/ZFP36L1/SMARCB1/JAG1/HLA-DRA/SOX4/AXL/BATF/CD74/HMGB3/MDK/C1QC/ZFP36L2/MMP14/MYC/SNAI2/HLA-DRB1/TESC/EIF6/NFKBIA/TGFB1/ANXA1/TMEM176B/CIB1	48
BP	GO:0030859	polarized epithelial cell differentiation	7/1406	24/18903	0.00139149	0.0111629	0.00808355	RHOA/RAB10/MSN/CDC42/PTK7/TP63/SLC9A3R1	7
BP	GO:1904666	regulation of ubiquitin protein ligase activity	7/1406	24/18903	0.00139149	0.0111629	0.00808355	PLK1/CDC20/RPS15/UBE2C/RPS20/RPL37/RPL11	7
BP	GO:2000637	positive regulation of miRNA-mediated gene silencing	7/1406	24/18903	0.00139149	0.0111629	0.00808355	DHX9/STAT3/PUM2/DDX5/TP53/EGFR/TGFB1	7
BP	GO:0001649	osteoblast differentiation	32/1406	246/18903	0.00141519	0.0113373	0.00820982	ADAR/SNRNP200/DHX9/HNRNPU/HNRNPC/RBMX/SYNCRIP/DDX21/PSMC2/CLTC/SND1/CTNNB1/CCDC47/RRBP1/RPS15/ALYREF/DDX5/TP63/JAG1/TPM4/RSL1D1/CLIC1/IFITM1/TNC/SOX9/SOX2/SNAI2/FASN/IGF2/JUND/IGFBP3/AREG	32
BP	GO:0071360	cellular response to exogenous dsRNA	6/1406	18/18903	0.00142548	0.0114038	0.00825798	DHX9/IFIH1/RALB/IFIT1/CAV1/FLOT1	6
BP	GO:0010799	regulation of peptidyl-threonine phosphorylation	10/1406	45/18903	0.00144594	0.0115194	0.0083417	EIF4G1/PLK1/CAB39/CALM3/APP/CALM2/CALM1/TNKS1BP1/CADM4/TGFB1	10
BP	GO:0032781	positive regulation of ATP-dependent activity	10/1406	45/18903	0.00144594	0.0115194	0.0083417	DHX9/HNRNPU/MSH2/PLSCR1/SUMO1/PFN2/DNAJB1/ATP1B1/ATP1B3/PFN1	10
BP	GO:0043620	regulation of DNA-templated transcription in response to stress	10/1406	45/18903	0.00144594	0.0115194	0.0083417	HSPA5/ATF6B/NFE2L2/HIF1A/NCK2/TP53/TMBIM6/BAG3/JUN/EGR1	10
BP	GO:1903036	positive regulation of response to wounding	14/1406	77/18903	0.00148069	0.01178	0.00853037	ITGB1/NFE2L2/ACTG1/FERMT1/ST3GAL4/F3/MDK/CLDN1/PLAU/FLNA/THBS1/GRN/ANXA1/THBD	14
BP	GO:0032355	response to estradiol	19/1406	121/18903	0.00150198	0.0119185	0.00863066	STAT3/CCNA2/PCNA/CDKN1B/CTNNB1/HNRNPD/PPP1R9B/CALR/ITGA2/EGFR/ENO2/ARPC1B/GPI/TXNIP/GJB2/TGFB1/ANXA1/AREG/GPX4	19
BP	GO:0070371	ERK1 and ERK2 cascade	41/1406	340/18903	0.00150224	0.0119185	0.00863066	PRMT5/PTPN1/ABL1/PTPN11/HMGB1/CDK1/RANBP9/GBP1/FAM83D/APP/TRAF7/ITGAV/SHC1/TNIP1/ICAM1/ZFP36L1/PSCA/NELFE/PHB2/SOX9/CD74/EGFR/CCR7/YWHAZ/GNAI2/FN1/CD44/CRKL/ZFP36L2/CSF1R/MYC/CTSH/JUN/HLA-DRB1/TGFB1/ERRFI1/SLC9A3R1/CCL20/FGFR3/EZR/CIB1	41
BP	GO:0016197	endosomal transport	32/1406	247/18903	0.00151287	0.0119698	0.00866781	SNX6/DCTN1/UBAP1/RAB14/VCP/ARF6/CHMP5/SNX12/VPS26A/CLTC/VAMP3/PICALM/YKT6/RAB7A/CORO1C/CHMP1B/TMEM50A/LAPTM4B/RAB10/RAB6A/USP7/MICALL1/SNX17/ARL8B/CHMP2B/CHMP1A/ARL4C/SNX3/EHD2/CMTM6/SQSTM1/CHMP2A	32
BP	GO:0051259	protein complex oligomerization	32/1406	247/18903	0.00151287	0.0119698	0.00866781	ECT2/CPSF7/RRM1/G3BP2/NUDT21/RBMX/YME1L1/ATL2/SAMHD1/MAT2A/TNFAIP1/FUS/FARSA/B2M/RRM2/STOML2/SIGMAR1/ALDH9A1/TP53/HPRT1/TK1/LRRC8A/TP63/SHKBP1/PRNP/SHMT2/SOD2/CD74/CLDN1/HLA-DRB1/HSD17B10/CHMP2A	32
BP	GO:1902229	regulation of intrinsic apoptotic signaling pathway in response to DNA damage	9/1406	38/18903	0.0015385	0.0121079	0.00876783	HNRNPK/KDM1A/CD74/CD44/TPT1/SNAI2/BCL2L1/ZNF385A/RPL26	9
BP	GO:0150116	regulation of cell-substrate junction organization	13/1406	69/18903	0.00154191	0.0121079	0.00876783	ABL1/PTPRA/ARF6/MAP4K4/RCC2/TLN1/CORO1C/RHOA/ACTG1/RAC1/POLDIP2/MMP14/THBS1	13
BP	GO:0001916	positive regulation of T cell mediated cytotoxicity	8/1406	31/18903	0.00154208	0.0121079	0.00876783	TAP2/B2M/HLA-E/HLA-B/HLA-A/HLA-F/HLA-DRA/HLA-DRB1	8
BP	GO:0045948	positive regulation of translational initiation	8/1406	31/18903	0.00154208	0.0121079	0.00876783	LARP1/KHDRBS1/YTHDF2/DDX3X/YTHDF1/UHMK1/CDC123/POLR2G	8
BP	GO:1902751	positive regulation of cell cycle G2/M phase transition	8/1406	31/18903	0.00154208	0.0121079	0.00876783	RRM1/RCC2/CDK1/CCNB1/APP/CDC25B/CDK4/NPM1	8
BP	GO:0030838	positive regulation of actin filament polymerization	11/1406	53/18903	0.00154296	0.0121079	0.00876783	GRB2/ARF6/RHOA/NCK2/PFN2/CDC42EP4/CDC42EP5/ARPC2/CCR7/PFN1/CDC42EP1	11
BP	GO:0070918	small regulatory ncRNA processing	12/1406	61/18903	0.00156821	0.0122893	0.0088992	ADAR/TSN/STAT3/HNRNPA2B1/DDX3X/SRSF3/PUM2/DDX5/TP53/ZMPSTE24/EGFR/TGFB1	12
BP	GO:0006970	response to osmotic stress	15/1406	86/18903	0.00157854	0.0123534	0.00894563	DDX3X/CAB39/XRCC5/NOLC1/HSP90AA1/HSP90AB1/TP53/LRRC8A/ITGA2/ZFP36L1/YBX3/TSPO/CLDN1/FBP1/ERRFI1	15
BP	GO:0006006	glucose metabolic process	26/1406	188/18903	0.00159906	0.012497	0.00904959	WDTC1/DDB1/WDR5/PMAIP1/ARPP19/PGM1/ADIPOR1/USP7/PGK1/PGM2/ENO1/TPI1/TP53/PFKP/OAS1/HK1/ZMPSTE24/MDH2/ENO2/GPI/PKM/IGF2/IGFBP4/FBP1/IGFBP3/GAPDH	26
BP	GO:0007091	metaphase/anaphase transition of mitotic cell cycle	16/1406	95/18903	0.00163963	0.0127621	0.00924155	DLGAP5/RAD21/PLK1/ACTL6A/CDCA8/ARID1A/TPR/ZWINT/CCNB1/SMARCC1/BIRC5/CDC20/AURKB/UBE2C/ACTB/SMARCB1	16
BP	GO:0034109	homotypic cell-cell adhesion	16/1406	95/18903	0.00163963	0.0127621	0.00924155	JAK1/DSG2/RAP2B/TLN1/MYH9/DSP/ACTB/ACTG1/MYL12A/CLIC1/HSPB1/FN1/PPIA/FLNA/JUP/CD9	16
BP	GO:1902099	regulation of metaphase/anaphase transition of cell cycle	16/1406	95/18903	0.00163963	0.0127621	0.00924155	DLGAP5/RAD21/PLK1/ACTL6A/CDCA8/ARID1A/TPR/ZWINT/CCNB1/SMARCC1/BIRC5/CDC20/AURKB/UBE2C/ACTB/SMARCB1	16
BP	GO:0002262	myeloid cell homeostasis	24/1406	169/18903	0.00165214	0.0128421	0.00929948	ADAR/PRKDC/STAT3/STAT1/PTBP3/HMGB1/SLC25A5/NCSTN/HMGB2/B2M/HIF1A/HSPA9/MAFB/BAK1/ZFP36L1/DNASE2/AXL/TMEM14C/RPS24/GPI/RPS14/RPS19/ANXA1/RPS6	24
BP	GO:0022904	respiratory electron transport chain	19/1406	122/18903	0.00165778	0.0128685	0.00931859	PUM2/CDK1/CCNB1/PLEC/GHITM/UQCRFS1/UQCRC2/CHCHD2/NDUFB10/COX4I1/SOD2/NDUFA1/COX6B1/UQCRQ/COX7C/UQCR10/NDUFB7/NDUFS2/COX5B	19
BP	GO:0031023	microtubule organizing center organization	22/1406	150/18903	0.00166642	0.0129181	0.00935454	XPO1/CKAP5/NUP62/DCTN1/KIF11/PLK1/AURKA/CHMP5/CDK1/CTNNB1/CDK2/CHMP1B/E2F4/SLC16A1/CHMP2B/CHMP1A/FBXW5/NPM1/PLK2/ATF5/GADD45A/CHMP2A	22
BP	GO:0043154	negative regulation of cysteine-type endopeptidase activity involved in apoptotic process	14/1406	78/18903	0.00168349	0.0130329	0.00943767	PAK2/DDX3X/CSNK2A1/INTS1/BIRC5/ARL6IP1/PRDX3/IFI6/RAF1/MAGEA3/CD44/DHCR24/GPI/THBS1	14
BP	GO:0032467	positive regulation of cytokinesis	10/1406	46/18903	0.00172639	0.0133291	0.00965218	ECT2/RACGAP1/NUP62/CDCA8/BIRC5/CDC25B/RHOA/AURKB/CDC42/POLDIP2	10
BP	GO:0097178	ruffle assembly	10/1406	46/18903	0.00172639	0.0133291	0.00965218	PIP5K1A/ARF6/RCC2/CORO1C/PFN2/ICAM1/RAC1/RHOG/CAV1/PFN1	10
BP	GO:0001889	liver development	21/1406	141/18903	0.00173016	0.0133403	0.00966026	PRMT5/AURKA/ARF6/JARID2/PCNA/TYMS/HNRNPD/CDKN2B/SLC7A5/ITGA2/TNFAIP3/MET/SMARCB1/PRKCSH/ZMPSTE24/SOD2/SOX9/MDK/CLDN1/JUN/ANXA1	21
BP	GO:0007008	outer mitochondrial membrane organization	5/1406	13/18903	0.00175364	0.0133699	0.0096817	HSP90AA1/HSPA4/TOMM20/TOMM22/PDCD5	5
BP	GO:0031272	regulation of pseudopodium assembly	5/1406	13/18903	0.00175364	0.0133699	0.0096817	CDC42/CDC42EP4/CDC42EP5/CCR7/CDC42EP1	5
BP	GO:0031274	positive regulation of pseudopodium assembly	5/1406	13/18903	0.00175364	0.0133699	0.0096817	CDC42/CDC42EP4/CDC42EP5/CCR7/CDC42EP1	5
BP	GO:0035437	maintenance of protein localization in endoplasmic reticulum	5/1406	13/18903	0.00175364	0.0133699	0.0096817	HSPA5/KDELR2/OS9/GPAA1/KDELR1	5
BP	GO:0045040	protein insertion into mitochondrial outer membrane	5/1406	13/18903	0.00175364	0.0133699	0.0096817	HSP90AA1/HSPA4/TOMM20/TOMM22/PDCD5	5
BP	GO:0046831	regulation of RNA export from nucleus	5/1406	13/18903	0.00175364	0.0133699	0.0096817	DHX9/NUP153/KHDRBS1/NSUN2/TPR	5
BP	GO:0090235	regulation of metaphase plate congression	5/1406	13/18903	0.00175364	0.0133699	0.0096817	HNRNPU/CDCA8/DYNC1H1/BIRC5/AURKB	5
BP	GO:0006364	rRNA processing	30/1406	229/18903	0.00175491	0.0133699	0.0096817	XRN2/PRKDC/WBP11/YTHDF2/DDX21/DKC1/EIF4A3/NOLC1/NOP56/RPS28/SBDS/RPS15/RIOK3/RPL14/PES1/TSR2/DDX17/RSL1D1/RPS24/RPS8/RPS25/RPS14/RPS19/EIF6/RPL11/RPS21/RPL26/RPL27/RPL35/RPS6	30
BP	GO:0071241	cellular response to inorganic substance	30/1406	229/18903	0.00175491	0.0133699	0.0096817	ECT2/TIMELESS/DAXX/CCNA2/IQGAP1/PARP1/HSPA5/EIF4A3/CDKN1B/CDK2/APP/HNRNPD/NCSTN/B2M/SUMO1/NFE2L2/CALR/CLIC4/PRNP/TSPO/CYBB/EGFR/CLDN1/JUN/CDH1/FBP1/JUND/SLC40A1/CPNE1/SYT8	30
BP	GO:0071383	cellular response to steroid hormone stimulus	28/1406	209/18903	0.00175758	0.0133725	0.00968358	HNRNPU/CNOT1/DAXX/ARID1A/DNAJA1/HSPA8/PARP1/PTGES3/ATP1A1/YWHAH/NCOA4/HDAC1/TAF7/RHOA/CALR/DDX5/URI1/KDM1A/DDX17/TP63/FKBP4/ZFP36L1/PHB2/ZFP36L2/PMEPA1/GJB2/ANXA1/ERRFI1	28
BP	GO:0002460	adaptive immune response based on somatic recombination of immune receptors built from immunoglobulin superfamily domains	44/1406	375/18903	0.00178031	0.0135276	0.00979587	STAT3/MSH2/HMGB1/TAP2/UNG/ZBTB7B/HMCES/B2M/MYD88/HLA-E/HSPD1/HLA-B/HPRT1/TFRC/ICAM1/TNFAIP3/IRF7/HLA-A/HLA-F/JAG1/HLA-DRA/CTSC/HLA-DPA1/BATF/CD74/FCGR3A/AHR/SERPING1/C1QC/HLA-DQA1/C1QBP/CTSH/HLA-DQA2/C1QB/HLA-DMA/HLA-DRB1/TGFB1/HLA-DPB1/C1R/C1S/ANXA1/CXCL13/FCER1G/HLA-DQB1	44
BP	GO:0030216	keratinocyte differentiation	24/1406	170/18903	0.00179138	0.0135937	0.00984374	PIP5K1A/CLIC4/PLEC/MAFB/FLNB/DSP/FOSL2/CDH3/TP63/ZFP36L1/ADAM9/JAG1/KRT7/KRT6A/TXNIP/SRSF6/KRT5/EVPL/IRF6/ANXA1/ST14/ERRFI1/KRT8/KRT6C	24
BP	GO:0031113	regulation of microtubule polymerization	11/1406	54/18903	0.00180969	0.0136264	0.00986742	CKAP5/DCTN1/ABL1/MAPRE1/CDKN1B/GIT1/STMN1/DRG1/FKBP4/MET/RAC1	11
BP	GO:0045980	negative regulation of nucleotide metabolic process	7/1406	25/18903	0.0018099	0.0136264	0.00986742	STAT3/PARP1/GIT1/TP53/TSPO/CDA/FBP1	7
BP	GO:0060148	positive regulation of post-transcriptional gene silencing	7/1406	25/18903	0.0018099	0.0136264	0.00986742	DHX9/STAT3/PUM2/DDX5/TP53/EGFR/TGFB1	7
BP	GO:0086064	cell communication by electrical coupling involved in cardiac conduction	7/1406	25/18903	0.0018099	0.0136264	0.00986742	ATP1A1/CALM3/CALM2/ATP1B1/CALM1/CAV1/GJA1	7
BP	GO:1900078	positive regulation of cellular response to insulin stimulus	7/1406	25/18903	0.0018099	0.0136264	0.00986742	PTPN11/NUCKS1/ADIPOR1/ZBTB7B/MYO1C/GNAI2/IGF2	7
BP	GO:1900370	positive regulation of post-transcriptional gene silencing by RNA	7/1406	25/18903	0.0018099	0.0136264	0.00986742	DHX9/STAT3/PUM2/DDX5/TP53/EGFR/TGFB1	7
BP	GO:0022617	extracellular matrix disassembly	12/1406	62/18903	0.00181538	0.0136497	0.00988434	LAMC1/ADAM15/CTSS/LCP1/DDR1/FSCN1/FURIN/MMP14/FLOT1/MMP12/TGFB1/CST3	12
BP	GO:0071675	regulation of mononuclear cell migration	19/1406	123/18903	0.00182704	0.0137195	0.00993484	WNK1/ABL1/AKIRIN1/HMGB1/CD47/APP/RHOA/CALR/MSN/CREB3/CXCL10/CCR7/MDK/CRKL/CSF1R/C1QBP/THBS1/CXCL13/CCL20	19
BP	GO:0001738	morphogenesis of a polarized epithelium	16/1406	96/18903	0.0018346	0.0137225	0.00993705	ABL1/DVL3/RHOA/VANGL2/RAB10/MSN/CDC42/ACTB/ACTG1/FZD6/PTK7/LAMA3/TP63/RAC1/WDR1/SLC9A3R1	16
BP	GO:0007032	endosome organization	16/1406	96/18903	0.0018346	0.0137225	0.00993705	UBAP1/ATP6V1A/CHMP5/RNF26/RAB7A/CORO1C/CHMP1B/ATP6AP2/LAPTM4B/SCARB2/CHMP2B/CHMP1A/SNX3/PLEKHF1/SQSTM1/CHMP2A	16
BP	GO:0032091	negative regulation of protein binding	16/1406	96/18903	0.0018346	0.0137225	0.00993705	ADNP/AURKA/ATP2A2/RALB/ADAM15/PTPRF/B2M/AURKB/ACTB/KDM1A/TMBIM6/IFIT1/CTSZ/PPP1CA/CAV1/ID1	16
BP	GO:0009408	response to heat	18/1406	114/18903	0.00185274	0.0138402	0.0100223	DAXX/DNAJA1/TPR/VCP/PSIP1/IRAK1/RBBP7/MAPKAPK2/HSP90AA1/SUMO1/YWHAE/HSP90AB1/DNAJB1/BAG3/CXCL10/HSPB1/ANO1/THBS1	18
BP	GO:0032760	positive regulation of tumor necrosis factor production	17/1406	105/18903	0.00185712	0.0138549	0.0100329	DHX9/OAS3/STAT3/PTPN11/IFIH1/OAS2/HMGB1/MAPKAPK2/APP/MYD88/HLA-E/OAS1/IFNGR1/CYBB/HSPB1/FCGR3A/THBS1	17
BP	GO:0000086	G2/M transition of mitotic cell cycle	21/1406	142/18903	0.00189149	0.0140931	0.0102054	FOXM1/RRM1/KHDRBS1/MELK/CCNA2/RAD21/PLK1/AURKA/RCC2/ARPP19/CDK1/CCNB1/CALM3/CDK2/APP/CALM2/CDC25B/AURKB/CDK4/CALM1/ENSA	21
BP	GO:0002443	leukocyte mediated immunity	52/1406	463/18903	0.00190504	0.0141756	0.0102652	MSH2/DDX21/PLEKHM2/HMGB1/RNF19B/TUBB/DDX1/TAP2/UNG/HMCES/B2M/LAMP1/KIF5B/MYD88/HLA-E/HSPD1/HLA-B/HPRT1/TFRC/ARL8B/ICAM1/IRF7/HLA-A/HLA-F/JAG1/HLA-DRA/CTSC/WDR1/HLA-DPA1/BATF/CD74/FCGR3A/AHR/SERPING1/RAC2/C1QC/HLA-DQA1/NKG7/BST2/C1QBP/CTSH/HLA-DQA2/C1QB/TUBB4B/HLA-DMA/HLA-DRB1/TGFB1/HLA-DPB1/C1R/C1S/FCER1G/HLA-DQB1	52
BP	GO:0031116	positive regulation of microtubule polymerization	8/1406	32/18903	0.00192384	0.0142786	0.0103397	CKAP5/DCTN1/MAPRE1/CDKN1B/GIT1/DRG1/MET/RAC1	8
BP	GO:0051085	chaperone cofactor-dependent protein refolding	8/1406	32/18903	0.00192384	0.0142786	0.0103397	HSPA8/PTGES3/HSPA5/HSPH1/HSPA9/DNAJB1/ST13/CD74	8
BP	GO:0010632	regulation of epithelial cell migration	36/1406	292/18903	0.00193134	0.0143158	0.0103667	ABL1/ARF6/MAP4K4/HMGB1/CORO1C/RIN2/ADIPOR1/RHOA/NFE2L2/CALR/HIF1A/PFN2/ITGA2/AAMP/MET/ADAM9/RAC1/RTN4/ITGA3/SOX9/HSPB1/PLK2/GLUL/CTSH/JUN/GPI/GADD45A/THBS1/PFN1/GRN/TGFB1/ANXA1/CXCL13/EFNA1/JUP/CIB1	36
BP	GO:0099563	modification of synaptic structure	6/1406	19/18903	0.00195342	0.0144423	0.0104582	ABL1/STAU1/RHOA/CDC42/PFN2/PFN1	6
BP	GO:1902176	negative regulation of oxidative stress-induced intrinsic apoptotic signaling pathway	6/1406	19/18903	0.00195342	0.0144423	0.0104582	NONO/NFE2L2/HIF1A/SOD2/HSPB1/PPIA	6
BP	GO:0000018	regulation of DNA recombination	20/1406	133/18903	0.00195728	0.0144522	0.0104655	ACTR2/MSH2/UBQLN4/TIMELESS/ACTL6A/KPNA2/PARP1/FUS/RPA2/MORF4L1/HMCES/MORF4L2/MAGEF1/ALYREF/ACTB/RMI2/TFRC/KDM1A/TGFB1/PPP4C	20
BP	GO:0007043	cell-cell junction assembly	22/1406	152/18903	0.00197871	0.0145917	0.0105665	ECT2/PAK2/CTNNA1/CTNND1/CTNNB1/TLN1/RHOA/ACTB/ACTG1/MYO1C/PKP3/WDR1/FSCN1/CLDN1/CAV1/SNAI2/RHOC/PKP1/GJB2/GJA1/JUP/CD9	22
BP	GO:0019693	ribose phosphate metabolic process	53/1406	475/18903	0.00199707	0.0147082	0.0106509	STAT3/ACLY/HSPA8/VCP/ATP6V1A/PARP1/DLST/PRPS1/OGDH/RAN/CMPK1/PRPS2/PGM1/APP/PAICS/ELOVL5/RHOA/STOML2/CTPS1/HIF1A/PGK1/LDHA/GIT1/SLC35B2/ENO1/TPI1/AK3/HPRT1/PFKP/PPT1/PGAM1/NT5E/ATP1B1/HK1/NME3/HMGCS1/NDUFB10/TSPO/NDUFA1/IMPDH1/HINT1/ENO2/CDA/GPI/PKM/NDUFB7/FBP1/PYGL/EIF6/TGFB1/NDUFS2/GAPDH/APRT	53
BP	GO:2000781	positive regulation of double-strand break repair	15/1406	88/18903	0.00200011	0.0147118	0.0106534	DTX3L/ACTR2/PRKDC/FOXM1/PARP9/TIMELESS/ACTL6A/ARID1A/PARP1/FUS/SMARCC1/MORF4L1/MORF4L2/ACTB/SMARCB1	15
BP	GO:0031348	negative regulation of defense response	34/1406	272/18903	0.0020197	0.014837	0.0107441	ADAR/OAS3/PARP14/YES1/YTHDF2/TRIM21/PARP1/SAMHD1/RNF26/STAT2/IFI16/PCBP2/GIT1/TRAFD1/HLA-E/RIOK3/HLA-B/TNFAIP3/HLA-A/HLA-F/NT5E/PSMB4/OAS1/SERPING1/PLK2/MDK/FURIN/C1QBP/RPS19/MMP12/HLA-DRB1/VSIG4/GRN/TNFRSF1A	34
BP	GO:0010824	regulation of centrosome duplication	10/1406	47/18903	0.00204925	0.0149965	0.0108596	XPO1/NUP62/CHMP5/CHMP1B/CHMP2B/CHMP1A/FBXW5/NPM1/PLK2/CHMP2A	10
BP	GO:0030521	androgen receptor signaling pathway	10/1406	47/18903	0.00204925	0.0149965	0.0108596	DAXX/ARID1A/DNAJA1/HDAC1/RHOA/DDX5/KDM1A/DDX17/FKBP4/PMEPA1	10
BP	GO:1900368	regulation of post-transcriptional gene silencing by RNA	10/1406	47/18903	0.00204925	0.0149965	0.0108596	ADAR/DHX9/EIF4G1/STAT3/PUM2/DDX5/TP53/ZMPSTE24/EGFR/TGFB1	10
BP	GO:2000113	negative regulation of cellular macromolecule biosynthetic process	35/1406	283/18903	0.00209898	0.0153298	0.0111009	DHX9/HNRNPU/EIF4G1/PATL1/LARP1/CNOT1/SAMD4B/PAIP1/YTHDF2/CAPRIN1/SYNCRIP/KHSRP/DDX3X/TPR/CSDE1/YTHDF1/LSM14A/EIF2AK1/IGF2BP2/EIF4A3/TYMS/HNRNPD/NCL/EIF4EBP2/ILF3/CALR/SRP9/POLR2G/ZFP36L1/TNKS1BP1/SHMT2/ZFP36L2/RPL13A/EIF6/GAPDH	35
BP	GO:1903034	regulation of response to wounding	24/1406	172/18903	0.00210012	0.0153298	0.0111009	CERS2/ITGB1/PTPRF/NFE2L2/GIT1/ACTG1/FERMT1/TNFAIP3/CADM4/ST3GAL4/SERPING1/F3/MDK/CLDN1/PLAU/FLNA/CAV1/ANXA2/SRSF6/THBS1/GRN/ANXA1/THBD/CD9	24
BP	GO:1901214	regulation of neuron death	39/1406	325/18903	0.00210837	0.0153705	0.0111304	SNX6/EIF4G1/MSH2/DAXX/ADNP/HDGF/SET/ABL1/DNAJC5/PARP1/NONO/HYOU1/PICALM/CTNNB1/MCL1/RHOA/SNCG/CAPN2/MYBL2/EFNB2/HIF1A/SIGMAR1/HSP90AB1/TP53/PPT1/HLA-F/PRNP/AXL/CTSZ/SOD2/MDK/DHCR24/ENO2/JUN/GPI/BCL2L1/UBE2M/EGR1/GRN	39
BP	GO:1903201	regulation of oxidative stress-induced cell death	14/1406	80/18903	0.00215867	0.0157173	0.0113816	UBQLN1/ABL1/SFPQ/PARP1/NONO/CTNNB1/MCL1/NFE2L2/HIF1A/MET/SOD2/HSPB1/PPIA/P4HB	14
BP	GO:0071222	cellular response to lipopolysaccharide	29/1406	222/18903	0.00216437	0.0157389	0.0113972	MTDH/ABL1/PRPF8/IRAK1/CHMP5/HMGB1/SBNO2/HMGB2/RHOA/CAPN2/EFNB2/MYD88/GIT1/TNIP1/SLC7A5/PAF1/LITAF/TNFAIP3/CXCL9/ADAM9/CDK4/AXL/CXCL10/TSPO/CXCL11/NFKBIA/TGFB1/CXCL13/CXCL1	29
BP	GO:0042098	T cell proliferation	28/1406	212/18903	0.00217302	0.0157819	0.0114283	ABL1/HMGB1/PRKAR1A/CTNNB1/SLC7A1/IRF1/NCSTN/ZBTB7B/CTPS1/NCK2/MSN/CD276/HLA-E/TP53/TFRC/HLA-A/PRNP/PLA2G2F/HLA-DPA1/RAC2/IGF2/HLA-DRB1/VSIG4/HLA-DPB1/ANXA1/EFNB1/IDO1/RPS6	28
BP	GO:0061008	hepaticobiliary system development	21/1406	144/18903	0.00225268	0.0163036	0.0118061	PRMT5/AURKA/ARF6/JARID2/PCNA/TYMS/HNRNPD/CDKN2B/SLC7A5/ITGA2/TNFAIP3/MET/SMARCB1/PRKCSH/ZMPSTE24/SOD2/SOX9/MDK/CLDN1/JUN/ANXA1	21
BP	GO:0001953	negative regulation of cell-matrix adhesion	9/1406	40/18903	0.0022562	0.0163036	0.0118061	MAP4K4/RCC2/ADAM15/CORO1C/CDKN2A/JAG1/MMP14/MMP12/THBS1	9
BP	GO:0045740	positive regulation of DNA replication	9/1406	40/18903	0.0022562	0.0163036	0.0118061	DHX9/CIZ1/SMARCA5/PCNA/CDK1/TNFAIP1/CDK2/STOML2/EGFR	9
BP	GO:1901998	toxin transport	9/1406	40/18903	0.0022562	0.0163036	0.0118061	COPB2/DNAJA1/HSPA5/CCT5/CCT3/TCP1/CCT8/CCT4/CCT7	9
BP	GO:0044784	metaphase/anaphase transition of cell cycle	16/1406	98/18903	0.00228302	0.0164767	0.0119315	DLGAP5/RAD21/PLK1/ACTL6A/CDCA8/ARID1A/TPR/ZWINT/CCNB1/SMARCC1/BIRC5/CDC20/AURKB/UBE2C/ACTB/SMARCB1	16
BP	GO:1903901	negative regulation of viral life cycle	7/1406	26/18903	0.00231964	0.01672	0.0121077	TRIM26/IFITM1/SNX3/IFITM3/PPIA/BST2/LY6E	7
BP	GO:0071353	cellular response to interleukin-4	8/1406	33/18903	0.0023763	0.017107	0.0123879	PARP14/TUBA1B/MCM2/HSPA5/HSP90AB1/CDK4/RPL3/FASN	8
BP	GO:0061564	axon development	54/1406	490/18903	0.00238434	0.0171434	0.0124143	PAK2/ADNP/ABL1/PTPN11/CNP/YTHDF1/CERS2/ITGB1/PICALM/PLXNA1/CTNNA1/APP/ECE1/PTPRF/HSP90AA1/KIF5B/B4GALT5/EFNB2/RAB10/GDI1/STMN1/S100A6/HSP90AB1/ACTB/LAMA3/RPL24/RAC1/DBN1/DAG1/RTN4/TSPO/TNC/DDR1/ALCAM/LAMC2/TUBB2B/NOTCH3/FN1/RAC2/CSF1R/RHOG/FLNA/JUN/APLP2/PLXNB2/CDH1/FLOT1/GRN/CRTAC1/UCHL1/EPHB6/EFNA1/EFNB1/TOP2B	54
BP	GO:0051893	regulation of focal adhesion assembly	12/1406	64/18903	0.00240578	0.0172544	0.0124947	ABL1/PTPRA/MAP4K4/RCC2/TLN1/CORO1C/RHOA/ACTG1/RAC1/POLDIP2/MMP14/THBS1	12
BP	GO:0090109	regulation of cell-substrate junction assembly	12/1406	64/18903	0.00240578	0.0172544	0.0124947	ABL1/PTPRA/MAP4K4/RCC2/TLN1/CORO1C/RHOA/ACTG1/RAC1/POLDIP2/MMP14/THBS1	12
BP	GO:0060147	regulation of post-transcriptional gene silencing	10/1406	48/18903	0.00241901	0.0173277	0.0125477	ADAR/DHX9/EIF4G1/STAT3/PUM2/DDX5/TP53/ZMPSTE24/EGFR/TGFB1	10
BP	GO:0031060	regulation of histone methylation	14/1406	81/18903	0.0024349	0.0174198	0.0126144	HCFC1/DNMT1/SNW1/CTCF/PYGO2/JARID2/WDR5/SMARCA5/CTNNB1/KDM1A/PAF1/SMARCB1/NELFE/LMNA	14
BP	GO:0051783	regulation of nuclear division	21/1406	145/18903	0.0024541	0.0174829	0.0126601	NUP62/DLGAP5/MKI67/PRMT5/RAD21/PLK1/CDCA8/AURKA/NUSAP1/TPR/ZWINT/CCNB1/BIRC5/CDC20/AURKB/CALR/CDC42/CAV2/RCC1/FBXW5/IGF2	21
BP	GO:0001836	release of cytochrome c from mitochondria	11/1406	56/18903	0.00245588	0.0174829	0.0126601	PSMD10/PMAIP1/TNFSF10/GHITM/TP53/BAK1/IFI6/SOD2/PDCD5/BCL2L1/LMNA	11
BP	GO:0033047	regulation of mitotic sister chromatid segregation	11/1406	56/18903	0.00245588	0.0174829	0.0126601	HNRNPU/RAD21/PLK1/CDCA8/TPR/ZWINT/CCNB1/BIRC5/CDC20/AURKB/PTTG1	11
BP	GO:0051438	regulation of ubiquitin-protein transferase activity	11/1406	56/18903	0.00245588	0.0174829	0.0126601	DTX3L/PLK1/ABL1/CDC20/RPS15/UBE2C/ARRDC3/RPS2/RPS20/RPL37/RPL11	11
BP	GO:0071887	leukocyte apoptotic process	18/1406	117/18903	0.00248821	0.0176912	0.012811	TCP1/AURKB/HIF1A/CDKN2A/TP53/BAK1/IRF7/AXL/CD74/CCR7/CRKL/BCL2L1/KDELR1/ANXA1/CTSL/EFNA1/IDO1/RPS6	18
BP	GO:0008637	apoptotic mitochondrial changes	17/1406	108/18903	0.00252879	0.0179354	0.0129877	NMT1/PSMD10/SLC25A5/PMAIP1/TMEM14A/TNFSF10/GHITM/HSPD1/TP53/BAK1/IFI6/SOD2/PDCD5/CHCHD10/JTB/BCL2L1/LMNA	17
BP	GO:0090398	cellular senescence	17/1406	108/18903	0.00252879	0.0179354	0.0129877	NUP62/ABL1/CDKN1B/CDK2/B2M/CALR/CDKN2A/CDKN2B/TP53/TP63/HMGA1/RSL1D1/ZMPSTE24/NPM1/PLK2/TBX2/LMNA	17
BP	GO:2001237	negative regulation of extrinsic apoptotic signaling pathway	16/1406	99/18903	0.00253936	0.0179881	0.013026	PSME3/DDX3X/CTNNA1/MCL1/HMGB2/ITGAV/PEA15/ITGA6/ICAM1/TNFAIP3/IFI6/RAF1/SNAI2/BCL2L1/THBS1/LMNA	16
BP	GO:0043558	regulation of translational initiation in response to stress	5/1406	14/18903	0.00256195	0.0180151	0.0130455	EIF2AK1/TMED2/NCK2/NPM1/PPP1CA	5
BP	GO:0046761	viral budding from plasma membrane	5/1406	14/18903	0.00256195	0.0180151	0.0130455	CHMP5/CHMP1B/CHMP2B/CHMP1A/CHMP2A	5
BP	GO:0051255	spindle midzone assembly	5/1406	14/18903	0.00256195	0.0180151	0.0130455	RACGAP1/PRC1/CDCA8/BIRC5/AURKB	5
BP	GO:0051645	Golgi localization	5/1406	14/18903	0.00256195	0.0180151	0.0130455	ARCN1/CDC42/COPG1/YWHAZ/SLC9A3R1	5
BP	GO:1902969	mitotic DNA replication	5/1406	14/18903	0.00256195	0.0180151	0.0130455	MCM6/MCM2/MCM4/MCM3/ZMPSTE24	5
BP	GO:1904294	positive regulation of ERAD pathway	5/1406	14/18903	0.00256195	0.0180151	0.0130455	UBQLN1/UBQLN2/BAG6/NFE2L2/CAV1	5
BP	GO:0043462	regulation of ATP-dependent activity	13/1406	73/18903	0.00261088	0.0182668	0.0132277	DHX9/HNRNPU/MSH2/MCM2/PLSCR1/SUMO1/PFN2/TP53/DNAJB1/IFIT1/ATP1B1/ATP1B3/PFN1	13
BP	GO:0071260	cellular response to mechanical stimulus	13/1406	73/18903	0.00261088	0.0182668	0.0132277	MTPN/IRF1/MYD88/PLEC/BAK1/ITGA2/BAG3/DAG1/SOX9/GADD45A/CNN2/SLC38A2/TNFRSF1A	13
BP	GO:0071677	positive regulation of mononuclear cell migration	13/1406	73/18903	0.00261088	0.0182668	0.0132277	WNK1/ABL1/HMGB1/CD47/APP/RHOA/CALR/CREB3/CXCL10/CCR7/C1QBP/CXCL13/CCL20	13
BP	GO:0072678	T cell migration	13/1406	73/18903	0.00261088	0.0182668	0.0132277	WNK1/ABL1/APP/RHOA/MSN/PLEC/ICAM1/CXCL16/CXCL10/CRKL/CXCL11/CXCL13/CCL20	13
BP	GO:0006144	purine nucleobase metabolic process	6/1406	20/18903	0.0026168	0.0182668	0.0132277	PRPS1/PAICS/HPRT1/KDM1A/SHMT2/APRT	6
BP	GO:1904292	regulation of ERAD pathway	6/1406	20/18903	0.0026168	0.0182668	0.0132277	UBQLN1/USP14/UBQLN2/BAG6/NFE2L2/CAV1	6
BP	GO:0050730	regulation of peptidyl-tyrosine phosphorylation	33/1406	266/18903	0.00263088	0.0183428	0.0132828	PAK2/SNX6/PARP9/PARP14/YES1/ADNP/HAX1/PTPN1/ABL1/PTPN11/PPP2CA/RAP2B/APP/NCL/NCK2/SHC1/TP53/PRNP/PPP2R1A/CADM4/CD74/EGFR/CD44/SPINK1/CSF1R/CAV1/IGF2/TNFRSF1A/TGFB1/ERRFI1/FGFR3/EFNA1/AREG	33
BP	GO:0016064	immunoglobulin mediated immune response	28/1406	215/18903	0.00266984	0.0185919	0.0134632	MSH2/UNG/HMCES/B2M/MYD88/HLA-E/HSPD1/TFRC/IRF7/HLA-DRA/HLA-DPA1/BATF/CD74/FCGR3A/SERPING1/C1QC/HLA-DQA1/C1QBP/HLA-DQA2/C1QB/HLA-DMA/HLA-DRB1/TGFB1/HLA-DPB1/C1R/C1S/FCER1G/HLA-DQB1	28
BP	GO:0032509	endosome transport via multivesicular body sorting pathway	9/1406	41/18903	0.00270318	0.0188013	0.0136148	UBAP1/VCP/CHMP5/CHMP1B/TMEM50A/LAPTM4B/CHMP2B/CHMP1A/CHMP2A	9
BP	GO:0051261	protein depolymerization	18/1406	118/18903	0.00273684	0.0190125	0.0137677	CKAP5/MTPN/CKAP2/TPX2/KIF2C/CAPZA1/HSPA8/SPTAN1/FLII/SPTBN1/PPP1R9B/TWF1/STMN1/LIMA1/WDR1/CFL1/CAPZB/CIB1	18
BP	GO:0034728	nucleosome organization	22/1406	156/18903	0.00275415	0.0190455	0.0137916	SUPT16H/MCM2/DAXX/SSRP1/ACTL6A/POLE3/ARID1A/BRD2/SET/HP1BP3/ANP32E/SMARCA5/NASP/SMARCC1/NAP1L4/ANP32B/ASF1B/HMGB2/HMGA1/SMARCB1/NPM1/SOX9	22
BP	GO:0031100	animal organ regeneration	12/1406	65/18903	0.00275484	0.0190455	0.0137916	PRMT5/CCNA2/AURKA/PCNA/CDK1/TYMS/PRPS2/LCP1/SLC7A5/BAK1/AXL/CLDN1	12
BP	GO:0035065	regulation of histone acetylation	12/1406	65/18903	0.00275484	0.0190455	0.0137916	BAZ1B/DEK/CTCF/PYGO2/DDX21/SET/SMARCA5/SF3B1/TAF7/SMARCB1/ZMPSTE24/SNAI2	12
BP	GO:0060760	positive regulation of response to cytokine stimulus	12/1406	65/18903	0.00275484	0.0190455	0.0137916	DHX9/PARP9/PARP14/IFIH1/LSM14A/HIF1A/IRF7/AXL/CD74/MMP12/LAPTM5/CPNE1	12
BP	GO:1903557	positive regulation of tumor necrosis factor superfamily cytokine production	17/1406	109/18903	0.00279333	0.0192756	0.0139583	DHX9/OAS3/STAT3/PTPN11/IFIH1/OAS2/HMGB1/MAPKAPK2/APP/MYD88/HLA-E/OAS1/IFNGR1/CYBB/HSPB1/FCGR3A/THBS1	17
BP	GO:0034101	erythrocyte homeostasis	20/1406	137/18903	0.00279483	0.0192756	0.0139583	ADAR/PRKDC/STAT3/STAT1/PTBP3/SLC25A5/HMGB2/B2M/HIF1A/HSPA9/MAFB/ZFP36L1/DNASE2/AXL/TMEM14C/RPS24/GPI/RPS14/RPS19/RPS6	20
BP	GO:0070828	heterochromatin organization	15/1406	91/18903	0.00280488	0.0192987	0.013975	DNMT1/CTCF/POLE3/LMNB1/TPR/LMNB2/HP1BP3/CBX3/HMGB1/SMARCA5/CDK2/HDAC1/TRIM28/KDM1A/LMNA	15
BP	GO:1901216	positive regulation of neuron death	15/1406	91/18903	0.00280488	0.0192987	0.013975	DAXX/ABL1/PARP1/PICALM/CTNNB1/MCL1/RHOA/CAPN2/MYBL2/EFNB2/TP53/PRNP/UBE2M/EGR1/GRN	15
BP	GO:0018208	peptidyl-proline modification	10/1406	49/18903	0.00284041	0.0194419	0.0140787	PPIL1/FKBP2/FKBP4/PPIC/PRDX4/PPIA/P4HA1/P4HB/FKBP1A/FKBP10	10
BP	GO:0043330	response to exogenous dsRNA	10/1406	49/18903	0.00284041	0.0194419	0.0140787	DHX9/DDX21/IFIH1/DDX1/RALB/IFIT1/CAV1/FLOT1/SLC3A2/NFKBIA	10
BP	GO:0035196	miRNA processing	11/1406	57/18903	0.00284261	0.0194419	0.0140787	ADAR/STAT3/HNRNPA2B1/DDX3X/SRSF3/PUM2/DDX5/TP53/ZMPSTE24/EGFR/TGFB1	11
BP	GO:0043388	positive regulation of DNA binding	11/1406	57/18903	0.00284261	0.0194419	0.0140787	PARP1/HMGB1/CALM3/CTNNB1/CALM2/HMGB2/TRIM28/DAZAP2/ITGA2/CALM1/TGFB1	11
BP	GO:1903053	regulation of extracellular matrix organization	11/1406	57/18903	0.00284261	0.0194419	0.0140787	ABL1/COLGALT1/LAMC1/DAG1/DDR1/SOX9/LAMB1/FSCN1/TNFRSF1A/TGFB1/CST3	11
BP	GO:0022900	electron transport chain	24/1406	176/18903	0.00285507	0.0194846	0.0141096	PUM2/CDK1/CCNB1/PLEC/GHITM/UQCRFS1/UQCRC2/CHCHD2/NDUFB10/COX4I1/SOD2/DHRS2/NDUFA1/CYBB/COX6B1/UQCRQ/GPX2/DEGS1/COX7C/UQCR10/NDUFB7/NDUFS2/COX5B/IDO1	24
BP	GO:0007179	transforming growth factor beta receptor signaling pathway	28/1406	216/18903	0.00285562	0.0194846	0.0141096	SNW1/SNX6/STAT3/STRAP/RBBP7/PARP1/HSPA5/RBBP4/HDAC1/SDCBP/CDKN2B/HSP90AB1/TP53/FERMT1/CAV2/ADAM9/ITGA3/ZYX/ITGB6/ITGB5/FURIN/JUN/CAV1/PMEPA1/FKBP1A/THBS1/TGFB1/ID1	28
BP	GO:0009156	ribonucleoside monophosphate biosynthetic process	8/1406	34/18903	0.00290802	0.0197952	0.0143345	PRPS1/CMPK1/PRPS2/PAICS/HPRT1/IMPDH1/CDA/APRT	8
BP	GO:0090162	establishment of epithelial cell polarity	8/1406	34/18903	0.00290802	0.0197952	0.0143345	ARF6/GOLPH3/RHOA/MSN/CDC42/FERMT1/PTK7/SLC9A3R1	8
BP	GO:0002418	immune response to tumor cell	7/1406	27/18903	0.0029332	0.0199194	0.0144245	HMGB1/ADAM15/HSPD1/HLA-A/AHR/NKG7/HLA-DRB1	7
BP	GO:0031639	plasminogen activation	7/1406	27/18903	0.0029332	0.0199194	0.0144245	PGK1/ENO1/CTSZ/DHCR24/PLAU/ANXA2/THBS1	7
BP	GO:0042267	natural killer cell mediated cytotoxicity	13/1406	74/18903	0.00295625	0.0200287	0.0145036	PLEKHM2/RNF19B/TUBB/LAMP1/KIF5B/HLA-E/HLA-B/ARL8B/HLA-A/HLA-F/FCGR3A/NKG7/TUBB4B	13
BP	GO:2000756	regulation of peptidyl-lysine acetylation	13/1406	74/18903	0.00295625	0.0200287	0.0145036	BAZ1B/DEK/CTCF/PYGO2/DDX21/SET/SMARCA5/SF3B1/TAF7/SMARCB1/SOX4/ZMPSTE24/SNAI2	13
BP	GO:0016050	vesicle organization	41/1406	353/18903	0.00300555	0.0203387	0.0147281	SEC23B/UBAP1/RAB14/SNAPIN/ATP6V1A/CHMP5/RNF26/GOLPH3/VAMP3/PICALM/RAB7A/TMED10/TFG/RAB1A/CORO1C/SDCBP/CHMP1B/TMED2/ATP6AP2/LAPTM4B/SAMD9/SCARB2/PEF1/ARL8B/AP2M1/CHMP2B/CAV2/CHMP1A/SEC16A/RAB38/SNX3/CAV1/ANXA2/SRGN/TRAPPC6A/PLEKHF1/SQSTM1/ANXA1/ZNF385A/TMED9/CHMP2A	41
BP	GO:0031507	heterochromatin formation	14/1406	83/18903	0.00307492	0.0207481	0.0150246	DNMT1/CTCF/POLE3/LMNB1/TPR/LMNB2/CBX3/HMGB1/SMARCA5/CDK2/HDAC1/TRIM28/KDM1A/LMNA	14
BP	GO:0019827	stem cell population maintenance	24/1406	177/18903	0.00307611	0.0207481	0.0150246	SMC1A/STAT3/SMC3/CNOT1/ACTL6A/ARID1A/KLF10/RBBP7/RBBP4/SMARCC1/CTNNB1/HDAC1/ACTB/PAF1/TP63/SMARCB1/JAG1/RAF1/SOX4/SOX9/ZFP36L2/SOX2/TPT1/MYC	24
BP	GO:1902115	regulation of organelle assembly	27/1406	207/18903	0.00307868	0.0207481	0.0150246	HNRNPU/NUP62/CNOT1/PLK1/G3BP2/TPR/DYNC1H1/CHMP5/UBQLN2/RALB/PIP4K2C/SDCBP/CHMP1B/RHOA/GDI2/LCP1/MSN/DRG1/RAB1B/CHMP2B/CHMP1A/NPM1/RNF5/PLK2/FSCN1/EZR/CHMP2A	27
BP	GO:2000060	positive regulation of ubiquitin-dependent protein catabolic process	17/1406	110/18903	0.00308047	0.0207481	0.0150246	UBQLN1/PLK1/AURKA/PSMD10/NUB1/VCP/UBQLN2/RNF19B/RAD23A/USP5/CDC20/SUMO1/SUMO2/NFE2L2/MAGEF1/CAV1/LAPTM5	17
BP	GO:0042773	ATP synthesis coupled electron transport	16/1406	101/18903	0.00312395	0.0209918	0.015201	CDK1/CCNB1/GHITM/UQCRFS1/UQCRC2/CHCHD2/NDUFB10/COX4I1/NDUFA1/COX6B1/UQCRQ/COX7C/UQCR10/NDUFB7/NDUFS2/COX5B	16
BP	GO:0042775	mitochondrial ATP synthesis coupled electron transport	16/1406	101/18903	0.00312395	0.0209918	0.015201	CDK1/CCNB1/GHITM/UQCRFS1/UQCRC2/CHCHD2/NDUFB10/COX4I1/NDUFA1/COX6B1/UQCRQ/COX7C/UQCR10/NDUFB7/NDUFS2/COX5B	16
BP	GO:0010812	negative regulation of cell-substrate adhesion	12/1406	66/18903	0.00314391	0.0211012	0.0152803	MAP4K4/RCC2/GBP1/ADAM15/CORO1C/RHOA/ACTN4/CDKN2A/JAG1/MMP14/MMP12/THBS1	12
BP	GO:0019724	B cell mediated immunity	28/1406	218/18903	0.00326033	0.0218317	0.0158092	MSH2/UNG/HMCES/B2M/MYD88/HLA-E/HSPD1/TFRC/IRF7/HLA-DRA/HLA-DPA1/BATF/CD74/FCGR3A/SERPING1/C1QC/HLA-DQA1/C1QBP/HLA-DQA2/C1QB/HLA-DMA/HLA-DRB1/TGFB1/HLA-DPB1/C1R/C1S/FCER1G/HLA-DQB1	28
BP	GO:0043523	regulation of neuron apoptotic process	28/1406	218/18903	0.00326033	0.0218317	0.0158092	SNX6/MSH2/ADNP/HDGF/SET/ABL1/DNAJC5/PARP1/NONO/HYOU1/CTNNB1/MCL1/RHOA/MYBL2/HIF1A/SIGMAR1/HSP90AB1/TP53/PPT1/PRNP/AXL/SOD2/MDK/JUN/GPI/BCL2L1/UBE2M/GRN	28
BP	GO:0042752	regulation of circadian rhythm	18/1406	120/18903	0.00329651	0.0219971	0.0159291	THRAP3/PRKDC/TIMELESS/TOP2A/DDB1/SFPQ/KLF10/PARP1/NONO/CDK1/PPP1CB/HNRNPD/PPP1CC/USP7/TP53/BHLHE40/MAGED1/PPP1CA	18
BP	GO:0051897	positive regulation of protein kinase B signaling	18/1406	120/18903	0.00329651	0.0219971	0.0159291	HAX1/MTDH/MAZ/ITGB1/HSP90AA1/HSP90AB1/MET/AXL/RTN4/EGFR/CCR7/F3/C1QBP/IGF2/THBS1/AKR1C2/TGFB1/CPNE1	18
BP	GO:1904029	regulation of cyclin-dependent protein kinase activity	18/1406	120/18903	0.00329651	0.0219971	0.0159291	IPO5/CCNA2/PLK1/IPO7/PSMD10/CKS1B/CDKN1B/CCNB1/CCNB2/CCNI/CDKN2A/CDKN2B/HSP90AB1/ACTB/TNFAIP3/EGFR/CKS2/GADD45A	18
BP	GO:0006376	mRNA splice site selection	10/1406	50/18903	0.0033184	0.0220635	0.0159771	SF1/SF3A1/RBMX/SF3A3/SRSF1/PSIP1/SRSF9/SNRPC/PUF60/SRSF6	10
BP	GO:0060966	regulation of gene silencing by RNA	10/1406	50/18903	0.0033184	0.0220635	0.0159771	ADAR/DHX9/EIF4G1/STAT3/PUM2/DDX5/TP53/ZMPSTE24/EGFR/TGFB1	10
BP	GO:1902041	regulation of extrinsic apoptotic signaling pathway via death domain receptors	10/1406	50/18903	0.0033184	0.0220635	0.0159771	DDX3X/PMAIP1/HMGB2/PEA15/ICAM1/TNFAIP3/RAF1/BCL2L1/MAL/THBS1	10
BP	GO:0061138	morphogenesis of a branching epithelium	25/1406	188/18903	0.00332179	0.0220635	0.0159771	TIMELESS/ABL1/GNA13/GRB2/PLXNA1/CTNNB1/TMED2/CLIC4/TP63/MET/CTSZ/DAG1/PHB2/DDR1/SOX9/MAGED1/MDK/PPP1CA/MMP14/MYC/CTSH/SNAI2/TBX2/ST14/AREG	25
BP	GO:0042177	negative regulation of protein catabolic process	17/1406	111/18903	0.00339165	0.0225015	0.0162943	USP14/SF3B3/SNX12/SMARCC1/BAG6/SDCBP/LAPTM4B/USP7/HSP90AB1/AZIN1/SNX3/EGFR/FURIN/FLNA/ANXA2/RPL11/CST3	17
BP	GO:0050808	synapse organization	48/1406	432/18903	0.00343547	0.0226892	0.0164302	ACTR2/EIF4G1/DCTN1/CHD4/ADNP/CAPRIN1/HSPA8/ABL1/VCP/STAU1/SNAPIN/ARF6/TUBB/WASF2/CTNNB1/CLSTN1/APP/CDC20/PTPRF/SDCBP/RHOA/SNCG/EFNB2/CDC42/PFN2/ACTB/ACTG1/ARF1/ARF4/ACTN1/PRNP/DBN1/DAG1/ITGA3/TNC/YWHAZ/CHCHD10/CAST/C1QC/CRKL/FLNA/C1QB/PLXNB2/CDH1/CFL1/PFN1/TUBA1A/EFNA1	48
BP	GO:0007063	regulation of sister chromatid cohesion	6/1406	21/18903	0.00343572	0.0226892	0.0164302	CTCF/RAD21/CDCA5/SFPQ/FEN1/CTNNB1	6
BP	GO:0051315	attachment of mitotic spindle microtubules to kinetochore	6/1406	21/18903	0.00343572	0.0226892	0.0164302	HNRNPU/CDCA8/KIF2C/MAPRE1/BIRC5/AURKB	6
BP	GO:1901739	regulation of myoblast fusion	6/1406	21/18903	0.00343572	0.0226892	0.0164302	CAPN2/CXCL9/CXCL10/EHD2/CD53/FLOT1	6
BP	GO:0022406	membrane docking	15/1406	93/18903	0.00347704	0.0229357	0.0166087	ATP2A2/VAMP3/YKT6/RALB/RAB7A/AHCYL1/ESYT2/ESYT1/RAB10/MSN/ICAM1/CAV2/CALM1/SNX3/EZR	15
BP	GO:0060218	hematopoietic stem cell differentiation	8/1406	35/18903	0.003528	0.0232452	0.0168328	PRKDC/YTHDF2/ABL1/XRCC5/NFE2L2/HSPA9/TP53/BATF	8
BP	GO:0001837	epithelial to mesenchymal transition	23/1406	169/18903	0.00353817	0.0232589	0.0168428	PPP2CA/FAM83D/CTNNB1/NOLC1/ADAM15/ADIPOR1/SDCBP/HNRNPAB/HIF1A/PEF1/TRIM28/DDX5/DDX17/JAG1/DAG1/RTN4/S100A4/SOX9/MDK/FLNA/SNAI2/TGFB1/EFNA1	23
BP	GO:1902904	negative regulation of supramolecular fiber organization	23/1406	169/18903	0.00353817	0.0232589	0.0168428	PAK2/MTPN/CKAP2/TPX2/CAPZA1/HSPA8/SPTAN1/MAPRE1/WASF2/FLII/VBP1/SPTBN1/TWF1/STMN1/PFN2/LIMA1/FKBP4/MET/SSH3/PFDN5/CAPZB/PFN1/CIB1	23
BP	GO:0060759	regulation of response to cytokine stimulus	24/1406	179/18903	0.00356169	0.0233717	0.0169244	ADAR/DHX9/OAS3/PARP9/PARP14/YTHDF2/PTPN1/PTPN11/IFIH1/IRAK1/SAMHD1/LSM14A/STAT2/HIF1A/TNFAIP3/IRF7/OAS1/AXL/CD74/CAV1/MMP12/TNFRSF1A/LAPTM5/CPNE1	24
BP	GO:0009259	ribonucleotide metabolic process	51/1406	466/18903	0.00356345	0.0233717	0.0169244	STAT3/ACLY/HSPA8/VCP/ATP6V1A/PARP1/DLST/OGDH/RAN/CMPK1/PRPS2/PGM1/APP/PAICS/ELOVL5/RHOA/STOML2/CTPS1/HIF1A/PGK1/LDHA/GIT1/SLC35B2/ENO1/TPI1/AK3/HPRT1/PFKP/PPT1/PGAM1/NT5E/ATP1B1/HK1/NME3/HMGCS1/NDUFB10/TSPO/NDUFA1/IMPDH1/HINT1/ENO2/CDA/GPI/PKM/NDUFB7/FBP1/EIF6/TGFB1/NDUFS2/GAPDH/APRT	51
BP	GO:0006406	mRNA export from nucleus	12/1406	67/18903	0.00357624	0.0234288	0.0169658	SMG5/HNRNPA2B1/POLDIP3/NSUN2/TPR/ALKBH5/SRSF3/EIF4A3/CASC3/RBM8A/ALYREF/MAGOH	12
BP	GO:0000212	meiotic spindle organization	5/1406	15/18903	0.00360966	0.0235139	0.0170274	AURKA/CCNB2/TUBG1/MYH9/PPP2R1A	5
BP	GO:0002468	dendritic cell antigen processing and presentation	5/1406	15/18903	0.00360966	0.0235139	0.0170274	HLA-DRA/CD74/CCR7/THBS1/HLA-DRB1	5
BP	GO:0006206	pyrimidine nucleobase metabolic process	5/1406	15/18903	0.00360966	0.0235139	0.0170274	TYMS/CMPK1/CTPS1/TYMP/CDA	5
BP	GO:0048820	hair follicle maturation	5/1406	15/18903	0.00360966	0.0235139	0.0170274	NSUN2/CTNNB1/CDH3/FERMT1/TRPC4AP	5
BP	GO:0051290	protein heterotetramerization	5/1406	15/18903	0.00360966	0.0235139	0.0170274	CPSF7/RRM1/NUDT21/FARSA/RRM2	5
BP	GO:0010971	positive regulation of G2/M transition of mitotic cell cycle	7/1406	28/18903	0.00366359	0.0238113	0.0172427	RRM1/RCC2/CDK1/CCNB1/APP/CDC25B/CDK4	7
BP	GO:0032801	receptor catabolic process	7/1406	28/18903	0.00366359	0.0238113	0.0172427	DTX3L/PTPN1/CAPN1/FURIN/ANXA2/TGFB1/LAPTM5	7
BP	GO:0030010	establishment of cell polarity	21/1406	150/18903	0.00370345	0.0240432	0.0174107	DCTN1/PLK1/ABL1/ARF6/MAPRE1/ITGB1/GOLPH3/HSP90AA1/RHOA/MYH9/RAB10/MSN/CDC42/HSP90AB1/FERMT1/PTK7/CCR7/FSCN1/CRKL/SLC9A3R1/GJA1	21
BP	GO:0002697	regulation of immune effector process	43/1406	379/18903	0.00372711	0.0241695	0.0175021	MSH2/DDX21/HMGB1/DDX60/DDX1/TAP2/MAPKAPK2/CD47/ZBTB7B/HMCES/B2M/LAMP1/MYD88/HLA-E/HSPD1/HLA-B/TFRC/SLC7A5/ICAM1/LITAF/HLA-A/HLA-F/TMBIM6/HLA-DRA/HK1/AXL/PHB2/BATF/CD74/AHR/SERPING1/RAC2/BST2/C1QBP/GPI/RPS19/CD59/HLA-DRB1/VSIG4/GRN/TGFB1/ANXA1/LAPTM5	43
BP	GO:0010822	positive regulation of mitochondrion organization	13/1406	76/18903	0.00375878	0.0242916	0.0175906	NMT1/AURKA/SLC25A5/PMAIP1/RALA/PGAM5/STOML2/HIF1A/TNFSF10/TP53/BAK1/PDCD5/CHCHD10	13
BP	GO:0042273	ribosomal large subunit biogenesis	13/1406	76/18903	0.00375878	0.0242916	0.0175906	TRAF7/ZNF622/RPL14/PES1/RPL24/RSL1D1/NPM1/RPL38/RPL23A/EIF6/RPL11/RPL26/RPL35	13
BP	GO:0030042	actin filament depolymerization	11/1406	59/18903	0.00376283	0.0242916	0.0175906	MTPN/CAPZA1/SPTAN1/FLII/SPTBN1/PPP1R9B/TWF1/LIMA1/WDR1/CFL1/CAPZB	11
BP	GO:0043666	regulation of phosphoprotein phosphatase activity	11/1406	59/18903	0.00376283	0.0242916	0.0175906	CALM3/PPP1R11/HSP90B1/GNA12/CALM2/PPP6R1/PPP1R9B/HSP90AB1/CALM1/GNAI2/FKBP1A	11
BP	GO:0016241	regulation of macroautophagy	22/1406	160/18903	0.00377125	0.0243187	0.0176102	UBQLN1/SNX6/LARP1/UBQLN4/SPTLC1/ATP6V1A/UBQLN2/VPS26A/SLC25A5/RALB/SUPT5H/PIP4K2C/OPTN/HIF1A/TP53/BAG3/POLDIP2/CAPN1/ATP6V1G1/UCHL1/GAPDH/HSPB8	22
BP	GO:0002347	response to tumor cell	9/1406	43/18903	0.00380554	0.0244848	0.0177305	HMGB1/ADAM15/HSPD1/HLA-A/AHR/NKG7/TXNIP/HLA-DRB1/LAPTM5	9
BP	GO:0031952	regulation of protein autophosphorylation	9/1406	43/18903	0.00380554	0.0244848	0.0177305	DDX3X/CALM3/RAP2B/CALM2/CALM1/TNKS1BP1/JUN/CAV1/ERRFI1	9
BP	GO:0061157	mRNA destabilization	16/1406	103/18903	0.00381541	0.0245209	0.0177566	DHX9/HNRNPU/PATL1/CNOT1/SAMD4B/PAIP1/YTHDF2/SYNCRIP/KHSRP/CSDE1/YTHDF1/HNRNPD/POLR2G/ZFP36L1/TNKS1BP1/ZFP36L2	16
BP	GO:0046785	microtubule polymerization	14/1406	85/18903	0.00384649	0.024585	0.017803	CKAP5/DCTN1/TPX2/ABL1/MAPRE1/RANBP9/CDKN1B/TUBG1/GIT1/STMN1/DRG1/FKBP4/MET/RAC1	14
BP	GO:0000387	spliceosomal snRNP assembly	10/1406	51/18903	0.00385815	0.024585	0.017803	PRMT5/AAR2/STRAP/PRPF8/PRPF19/SNRPC/LSM2/PRPF6/SNRPB/SNRPD3	10
BP	GO:0019083	viral transcription	10/1406	51/18903	0.00385815	0.024585	0.017803	DHX9/SNW1/TRIM21/NUCKS1/TAF11/HDAC1/PSMC3/SMARCB1/IFITM3/JUN	10
BP	GO:0031062	positive regulation of histone methylation	10/1406	51/18903	0.00385815	0.024585	0.017803	HCFC1/DNMT1/SNW1/JARID2/WDR5/SMARCA5/CTNNB1/PAF1/NELFE/LMNA	10
BP	GO:0033046	negative regulation of sister chromatid segregation	10/1406	51/18903	0.00385815	0.024585	0.017803	RAD21/PLK1/CDCA8/TPR/ZWINT/CCNB1/BIRC5/CDC20/AURKB/PTTG1	10
BP	GO:0033048	negative regulation of mitotic sister chromatid segregation	10/1406	51/18903	0.00385815	0.024585	0.017803	RAD21/PLK1/CDCA8/TPR/ZWINT/CCNB1/BIRC5/CDC20/AURKB/PTTG1	10
BP	GO:2000816	negative regulation of mitotic sister chromatid separation	10/1406	51/18903	0.00385815	0.024585	0.017803	RAD21/PLK1/CDCA8/TPR/ZWINT/CCNB1/BIRC5/CDC20/AURKB/PTTG1	10
BP	GO:0032436	positive regulation of proteasomal ubiquitin-dependent protein catabolic process	15/1406	94/18903	0.00385957	0.024585	0.017803	UBQLN1/PLK1/AURKA/PSMD10/NUB1/VCP/UBQLN2/RNF19B/RAD23A/USP5/CDC20/SUMO1/SUMO2/NFE2L2/CAV1	15
BP	GO:0042987	amyloid precursor protein catabolic process	12/1406	68/18903	0.00405521	0.0257457	0.0186435	APH1A/PICALM/RANBP9/TMED10/NCSTN/RTN3/PRNP/IFNGR1/RTN4/DHCR24/FKBP1A/EFNA1	12
BP	GO:0070936	protein K48-linked ubiquitination	12/1406	68/18903	0.00405521	0.0257457	0.0186435	DTX3L/UBE2R2/CUL1/UBE2D3/UBE2H/UBE2T/UBE2C/TNFAIP3/RNF187/RNF5/PPIA/IFI27	12
BP	GO:1902808	positive regulation of cell cycle G1/S phase transition	12/1406	68/18903	0.00405521	0.0257457	0.0186435	EIF4G1/TFDP1/RRM1/DDX3X/FAM83D/RRM2/PAF1/APEX1/PHB2/EGFR/TBX2/ANXA1	12
BP	GO:0098727	maintenance of cell number	24/1406	181/18903	0.00411011	0.0260654	0.0188751	SMC1A/STAT3/SMC3/CNOT1/ACTL6A/ARID1A/KLF10/RBBP7/RBBP4/SMARCC1/CTNNB1/HDAC1/ACTB/PAF1/TP63/SMARCB1/JAG1/RAF1/SOX4/SOX9/ZFP36L2/SOX2/TPT1/MYC	24
BP	GO:0002228	natural killer cell mediated immunity	13/1406	77/18903	0.00422152	0.0266837	0.0193228	PLEKHM2/RNF19B/TUBB/LAMP1/KIF5B/HLA-E/HLA-B/ARL8B/HLA-A/HLA-F/FCGR3A/NKG7/TUBB4B	13
BP	GO:0008088	axo-dendritic transport	13/1406	77/18903	0.00422152	0.0266837	0.0193228	HNRNPU/HSPA8/STAU1/SFPQ/SNAPIN/DYNC1H1/APP/KIF5B/KIF1C/HIF1A/ARL8B/HSPB1/UCHL1	13
BP	GO:0009123	nucleoside monophosphate metabolic process	13/1406	77/18903	0.00422152	0.0266837	0.0193228	PRPS1/TYMS/CMPK1/PRPS2/PAICS/AK3/HPRT1/TK1/TYMP/NT5E/IMPDH1/CDA/APRT	13
BP	GO:0031112	positive regulation of microtubule polymerization or depolymerization	8/1406	36/18903	0.00424554	0.0267474	0.0193689	CKAP5/DCTN1/MAPRE1/CDKN1B/GIT1/DRG1/MET/RAC1	8
BP	GO:0070670	response to interleukin-4	8/1406	36/18903	0.00424554	0.0267474	0.0193689	PARP14/TUBA1B/MCM2/HSPA5/HSP90AB1/CDK4/RPL3/FASN	8
BP	GO:1903749	positive regulation of establishment of protein localization to mitochondrion	8/1406	36/18903	0.00424554	0.0267474	0.0193689	HUWE1/NMT1/SAE1/UBE2D3/SREBF2/PDCD5/RAC2/UBL5	8
BP	GO:0002237	response to molecule of bacterial origin	41/1406	360/18903	0.00425563	0.0267816	0.0193937	MTDH/ABL1/PRPF8/CNP/IRAK1/CHMP5/HMGB1/TAP2/MAPKAPK2/SBNO2/HMGB2/B2M/RHOA/CAPN2/EFNB2/MYD88/GIT1/TNIP1/SLC7A5/PAF1/LITAF/TNFAIP3/PRDX3/CXCL9/ADAM9/CDK4/AXL/CXCL10/TSPO/SOD2/CCR7/CLDN1/CXCL11/JUND/NFKBIA/GJB2/TGFB1/CXCL13/CXCL1/THBD/IDO1	41
BP	GO:0002753	cytoplasmic pattern recognition receptor signaling pathway	11/1406	60/18903	0.00430462	0.0270603	0.0195955	OAS3/IFIH1/LSM14A/PUM2/DDX60/RIOK3/TNFAIP3/IRF7/PHB2/C1QBP/NFKBIA	11
BP	GO:0002224	toll-like receptor signaling pathway	18/1406	123/18903	0.00431162	0.0270747	0.0196059	UBQLN1/DDX3X/IRAK1/HMGB1/MAPKAPK2/IRF1/CTSS/MYD88/HSPD1/TNIP1/TNFAIP3/IRF7/OAS1/RTN4/IFI35/CAV1/FLOT1/NFKBIA	18
BP	GO:0007034	vacuolar transport	22/1406	162/18903	0.00438726	0.0274399	0.0198703	DTX3L/M6PR/UBAP1/LAMP2/HSPA8/VCP/SNAPIN/CHMP5/RAB7A/NCOA4/CHMP1B/LAMP1/TMEM50A/SCARB2/ARL8B/CHMP2B/CHMP1A/PSAP/PLEKHF1/GRN/LAPTM5/CHMP2A	22
BP	GO:0032496	response to lipopolysaccharide	39/1406	339/18903	0.00439878	0.0274399	0.0198703	MTDH/ABL1/PRPF8/CNP/IRAK1/CHMP5/HMGB1/MAPKAPK2/SBNO2/HMGB2/RHOA/CAPN2/EFNB2/MYD88/GIT1/TNIP1/SLC7A5/PAF1/LITAF/TNFAIP3/PRDX3/CXCL9/ADAM9/CDK4/AXL/CXCL10/TSPO/SOD2/CCR7/CLDN1/CXCL11/JUND/NFKBIA/GJB2/TGFB1/CXCL13/CXCL1/THBD/IDO1	39
BP	GO:0010042	response to manganese ion	6/1406	22/18903	0.00443087	0.0274399	0.0198703	HSPA5/APP/TFRC/ADAM9/TSPO/SOD2	6
BP	GO:0035089	establishment of apical/basal cell polarity	6/1406	22/18903	0.00443087	0.0274399	0.0198703	RHOA/MSN/CDC42/PTK7/FSCN1/SLC9A3R1	6
BP	GO:0046128	purine ribonucleoside metabolic process	6/1406	22/18903	0.00443087	0.0274399	0.0198703	ICMT/PGM2/HPRT1/AHCY/NT5E/APRT	6
BP	GO:0046628	positive regulation of insulin receptor signaling pathway	6/1406	22/18903	0.00443087	0.0274399	0.0198703	PTPN11/NUCKS1/ADIPOR1/ZBTB7B/GNAI2/IGF2	6
BP	GO:0051220	cytoplasmic sequestering of protein	6/1406	22/18903	0.00443087	0.0274399	0.0198703	G3BP2/PSMD10/YWHAB/DBN1/FLNA/NFKBIA	6
BP	GO:0001765	membrane raft assembly	4/1406	10/18903	0.0044461	0.0274399	0.0198703	CAV2/CAV1/ANXA2/FLOT1	4
BP	GO:0010998	regulation of translational initiation by eIF2 alpha phosphorylation	4/1406	10/18903	0.0044461	0.0274399	0.0198703	EIF2AK1/TMED2/NCK2/NPM1	4
BP	GO:0033483	gas homeostasis	4/1406	10/18903	0.0044461	0.0274399	0.0198703	ADNP/HIF1A/SOD2/CAV1	4
BP	GO:0036093	germ cell proliferation	4/1406	10/18903	0.0044461	0.0274399	0.0198703	EIF2S2/PRDX4/UCHL1/CIB1	4
BP	GO:0042939	tripeptide transport	4/1406	10/18903	0.0044461	0.0274399	0.0198703	ABCC1/SLC25A39/SLC9A3R1/GJA1	4
BP	GO:0048194	Golgi vesicle budding	4/1406	10/18903	0.0044461	0.0274399	0.0198703	GOLPH3/TMED10/TMED2/TMED9	4
BP	GO:0097201	negative regulation of transcription from RNA polymerase II promoter in response to stress	4/1406	10/18903	0.0044461	0.0274399	0.0198703	NCK2/TMBIM6/BAG3/JUN	4
BP	GO:0098974	postsynaptic actin cytoskeleton organization	4/1406	10/18903	0.0044461	0.0274399	0.0198703	WASF2/ACTB/ACTG1/DBN1	4
BP	GO:1990034	calcium ion export across plasma membrane	4/1406	10/18903	0.0044461	0.0274399	0.0198703	CALM3/CALM2/YWHAE/CALM1	4
BP	GO:0010720	positive regulation of cell development	36/1406	307/18903	0.00445742	0.0274683	0.019891	SNW1/ACTR2/PRKDC/PRMT5/ADNP/CAPRIN1/AURKA/ABL1/ITGB1/PLXNA1/PRPF19/CTNNB1/XRCC5/HDAC1/PPP1CC/E2F1/CALR/HIF1A/GDI1/CDC42/KDM1A/SLC7A5/RAC1/DBN1/DAG1/TSPO/ARPC2/FN1/MDK/CRKL/C1QBP/FLNA/PLXNB2/P4HB/TGFB1/CIB1	36
BP	GO:0006220	pyrimidine nucleotide metabolic process	10/1406	52/18903	0.00446503	0.0274683	0.019891	PRPS1/TYMS/CMPK1/UNG/CTPS1/AK3/TYMP/DCTPP1/NME3/CDA	10
BP	GO:0061462	protein localization to lysosome	10/1406	52/18903	0.00446503	0.0274683	0.019891	M6PR/LAMP2/HSPA8/RAB7A/NCOA4/GLMP/SCARB2/LAMTOR4/RTN4/LAPTM5	10
BP	GO:0044275	cellular carbohydrate catabolic process	9/1406	44/18903	0.0044746	0.0274977	0.0199123	SCARB2/PGM2/TPI1/TP53/PGAM1/GUSB/PYGB/PPP1CA/PYGL	9
BP	GO:0030198	extracellular matrix organization	37/1406	318/18903	0.00452287	0.0275674	0.0199627	RIC8A/ABL1/ITGB1/COLGALT1/LAMC1/APP/ADAM15/CTSS/LCP1/B4GALT1/FERMT1/CAV2/COL17A1/DAG1/LAMB3/DDR1/SOX9/PRDX4/LAMB1/FSCN1/FURIN/MMP14/TGFBI/P4HA1/CAV1/COL12A1/ANXA2/COL5A2/SERPINH1/FLOT1/MMP12/SERPINB5/FBLN2/TNFRSF1A/TGFB1/CST3/FKBP10	37
BP	GO:0006622	protein targeting to lysosome	7/1406	29/18903	0.00452428	0.0275674	0.0199627	M6PR/LAMP2/HSPA8/RAB7A/NCOA4/SCARB2/LAPTM5	7
BP	GO:0008053	mitochondrial fusion	7/1406	29/18903	0.00452428	0.0275674	0.0199627	HUWE1/MFN2/MTCH2/STOML2/TFRC/BAK1/VAT1	7
BP	GO:0010955	negative regulation of protein processing	7/1406	29/18903	0.00452428	0.0275674	0.0199627	SNX12/PRNP/MAGEA3/CTSZ/CAST/PLAU/THBS1	7
BP	GO:0031571	mitotic G1 DNA damage checkpoint signaling	7/1406	29/18903	0.00452428	0.0275674	0.0199627	PRKDC/CDKN1B/CDK2/RPA2/TP53/PLK2/RPL26	7
BP	GO:0032607	interferon-alpha production	7/1406	29/18903	0.00452428	0.0275674	0.0199627	DHX9/STAT1/DDX3X/IFIH1/HSPD1/IRF7/MMP12	7
BP	GO:0032647	regulation of interferon-alpha production	7/1406	29/18903	0.00452428	0.0275674	0.0199627	DHX9/STAT1/DDX3X/IFIH1/HSPD1/IRF7/MMP12	7
BP	GO:1903318	negative regulation of protein maturation	7/1406	29/18903	0.00452428	0.0275674	0.0199627	SNX12/PRNP/MAGEA3/CTSZ/CAST/PLAU/THBS1	7
BP	GO:0001763	morphogenesis of a branching structure	26/1406	203/18903	0.00464013	0.0282434	0.0204522	TIMELESS/ABL1/GNA13/GRB2/PLXNA1/CTNNB1/TMED2/CLIC4/TP63/MET/CTSZ/DAG1/RTN4/PHB2/DDR1/SOX9/MAGED1/MDK/PPP1CA/MMP14/MYC/CTSH/SNAI2/TBX2/ST14/AREG	26
BP	GO:0071219	cellular response to molecule of bacterial origin	29/1406	234/18903	0.00467329	0.028399	0.0205649	MTDH/ABL1/PRPF8/IRAK1/CHMP5/HMGB1/SBNO2/HMGB2/RHOA/CAPN2/EFNB2/MYD88/GIT1/TNIP1/SLC7A5/PAF1/LITAF/TNFAIP3/CXCL9/ADAM9/CDK4/AXL/CXCL10/TSPO/CXCL11/NFKBIA/TGFB1/CXCL13/CXCL1	29
BP	GO:0034470	ncRNA processing	48/1406	439/18903	0.00467736	0.028399	0.0205649	ADAR/XRN2/TSN/PRKDC/WBP11/STAT3/HNRNPA2B1/YTHDF2/NSUN2/DDX21/DDX3X/INTS1/SRSF3/DKC1/PUM2/DDX1/EIF4A3/FTSJ1/NOLC1/NOP56/RPS28/SBDS/RPS15/DDX5/TP53/RTCB/RIOK3/RPL14/PES1/TSR2/DDX17/RSL1D1/RPS24/ZMPSTE24/EGFR/RPS8/RPS25/RPS14/RPS19/EIF6/TGFB1/HSD17B10/RPL11/RPS21/RPL26/RPL27/RPL35/RPS6	48
BP	GO:0048284	organelle fusion	21/1406	153/18903	0.00468051	0.028399	0.0205649	HUWE1/MFN2/SNAPIN/CHMP5/VAMP3/CDK1/RAB7A/MTCH2/CHMP1B/SAMD9/STOML2/TFRC/ARL8B/BAK1/CHMP2B/CAV2/CHMP1A/ANXA2/VAT1/ANXA1/CHMP2A	21
BP	GO:0071900	regulation of protein serine/threonine kinase activity	44/1406	395/18903	0.00472012	0.0286092	0.0207171	NUP62/IPO5/CCNA2/PLK1/IPO7/IQGAP1/DNAJA1/DDX3X/PTPN1/ABL1/PSMD10/CKS1B/IRAK1/CAB39/PRKAR1A/PPP2CA/DVL3/RALB/CDKN1B/CCNB1/CALM3/CCNB2/CALM2/RHOA/CCNI/CDKN2A/CDKN2B/HSP90AB1/ACTB/DAZAP2/TNFAIP3/ADAM9/CALM1/EGFR/MAGED1/CKS2/CSF1R/CAV1/GADD45A/IGF2/THBS1/TGFB1/UCHL1/CIB1	44
BP	GO:0072665	protein localization to vacuole	13/1406	78/18903	0.00472912	0.0286336	0.0207348	M6PR/UBAP1/LAMP2/HSPA8/GBP1/RAB7A/NCOA4/GLMP/SCARB2/TNFAIP3/LAMTOR4/RTN4/LAPTM5	13
BP	GO:0043062	extracellular structure organization	37/1406	319/18903	0.00476057	0.0287937	0.0208507	RIC8A/ABL1/ITGB1/COLGALT1/LAMC1/APP/ADAM15/CTSS/LCP1/B4GALT1/FERMT1/CAV2/COL17A1/DAG1/LAMB3/DDR1/SOX9/PRDX4/LAMB1/FSCN1/FURIN/MMP14/TGFBI/P4HA1/CAV1/COL12A1/ANXA2/COL5A2/SERPINH1/FLOT1/MMP12/SERPINB5/FBLN2/TNFRSF1A/TGFB1/CST3/FKBP10	37
BP	GO:0031110	regulation of microtubule polymerization or depolymerization	14/1406	87/18903	0.00476857	0.0288118	0.0208638	CKAP5/DCTN1/CKAP2/TPX2/ABL1/MAPRE1/CDKN1B/GIT1/STMN1/DRG1/FKBP4/MET/RAC1/CIB1	14
BP	GO:0006612	protein targeting to membrane	19/1406	134/18903	0.00486494	0.0293632	0.0212631	SRP72/HSPA5/SEC61A1/SSR3/ICMT/UBL4A/BAG6/SDCBP/PEX19/SRP9/GDI1/MICALL1/ARL6IP1/MYO1C/PRNP/SSR2/STOM/TRAM1/CIB1	19
BP	GO:0043112	receptor metabolic process	11/1406	61/18903	0.00490663	0.0295224	0.0213784	DTX3L/PTPN1/CHMP5/VAMP3/ECE1/OPTN/CAPN1/FURIN/ANXA2/TGFB1/LAPTM5	11
BP	GO:0086065	cell communication involved in cardiac conduction	11/1406	61/18903	0.00490663	0.0295224	0.0213784	DSG2/ATP1A1/CALM3/CALM2/DSP/ATP1B1/CALM1/FLNA/CAV1/GJA1/JUP	11
BP	GO:0031269	pseudopodium assembly	5/1406	16/18903	0.00493238	0.0295224	0.0213784	CDC42/CDC42EP4/CDC42EP5/CCR7/CDC42EP1	5
BP	GO:0032239	regulation of nucleobase-containing compound transport	5/1406	16/18903	0.00493238	0.0295224	0.0213784	DHX9/NUP153/KHDRBS1/NSUN2/TPR	5
BP	GO:0045144	meiotic sister chromatid segregation	5/1406	16/18903	0.00493238	0.0295224	0.0213784	SMC1A/SMC3/STAG2/RAD21/PPP2R1A	5
BP	GO:0051177	meiotic sister chromatid cohesion	5/1406	16/18903	0.00493238	0.0295224	0.0213784	SMC1A/SMC3/STAG2/RAD21/PPP2R1A	5
BP	GO:0061684	chaperone-mediated autophagy	5/1406	16/18903	0.00493238	0.0295224	0.0213784	LAMP2/HSPA8/HSP90AA1/BAG3/EEF1A1	5
BP	GO:1901741	positive regulation of myoblast fusion	5/1406	16/18903	0.00493238	0.0295224	0.0213784	CAPN2/CXCL9/EHD2/CD53/FLOT1	5
BP	GO:0050921	positive regulation of chemotaxis	20/1406	144/18903	0.00497882	0.0297694	0.0215573	WNK1/AKIRIN1/HMGB1/CALR/CREB3/ITGA2/MET/RAC1/CXCL10/HSPB1/CD74/CCR7/F3/MDK/RAC2/CSF1R/C1QBP/THBS1/TGFB1/CXCL13	20
BP	GO:0009314	response to radiation	49/1406	452/18903	0.00506497	0.0301596	0.0218398	SMC1A/USP1/ECT2/NMT1/PRKDC/MSH2/RIC8A/DDB1/GRB2/FEN1/PARP1/NUCKS1/HSPA5/COPS3/ITGB1/PCNA/PPP1CB/IFI16/XRCC6/XRCC5/APP/PPP1CC/AURKB/HMGN1/HIF1A/TMEM109/TP53/KDM1A/BAK1/CXCL10/TNKS1BP1/ZMPSTE24/NPM1/SOD2/EGFR/NET1/BHLHE40/REEP6/ITGB6/PPP1CA/MYC/GADD45A/SNAI2/BCL2L1/EGR1/JUND/ANXA1/THBD/RPL26	49
BP	GO:0044319	wound healing, spreading of cells	8/1406	37/18903	0.00507029	0.0301596	0.0218398	ITGB1/RHOA/FERMT1/DDR1/CD44/FLNA/RHOC/MMP12	8
BP	GO:0051084	'de novo' post-translational protein folding	8/1406	37/18903	0.00507029	0.0301596	0.0218398	HSPA8/PTGES3/HSPA5/HSPH1/HSPA9/DNAJB1/ST13/CD74	8
BP	GO:0090151	establishment of protein localization to mitochondrial membrane	8/1406	37/18903	0.00507029	0.0301596	0.0218398	NMT1/CALM3/HSP90AA1/HSPA4/TOMM20/TOMM22/PDCD5/ROMO1	8
BP	GO:0090505	epiboly involved in wound healing	8/1406	37/18903	0.00507029	0.0301596	0.0218398	ITGB1/RHOA/FERMT1/DDR1/CD44/FLNA/RHOC/MMP12	8
BP	GO:0051985	negative regulation of chromosome segregation	10/1406	53/18903	0.00514459	0.0305384	0.0221141	RAD21/PLK1/CDCA8/TPR/ZWINT/CCNB1/BIRC5/CDC20/AURKB/PTTG1	10
BP	GO:1905819	negative regulation of chromosome separation	10/1406	53/18903	0.00514459	0.0305384	0.0221141	RAD21/PLK1/CDCA8/TPR/ZWINT/CCNB1/BIRC5/CDC20/AURKB/PTTG1	10
BP	GO:0051881	regulation of mitochondrial membrane potential	12/1406	70/18903	0.00516721	0.030641	0.0221884	ABL1/VCP/PARP1/PMAIP1/STOML2/BAK1/PRDX3/IFI6/CLIC1/TSPO/SOD2/BCL2L1	12
BP	GO:0002690	positive regulation of leukocyte chemotaxis	15/1406	97/18903	0.005218	0.0308964	0.0223734	WNK1/AKIRIN1/HMGB1/CALR/CREB3/RAC1/CXCL10/CD74/CCR7/MDK/RAC2/CSF1R/C1QBP/THBS1/CXCL13	15
BP	GO:0030574	collagen catabolic process	9/1406	45/18903	0.00523176	0.0308964	0.0223734	ITGB1/ADAM15/CTSS/FURIN/MMP14/MMP12/CTSB/CTSL/CST3	9
BP	GO:0060964	regulation of miRNA-mediated gene silencing	9/1406	45/18903	0.00523176	0.0308964	0.0223734	DHX9/EIF4G1/STAT3/PUM2/DDX5/TP53/ZMPSTE24/EGFR/TGFB1	9
BP	GO:0062208	positive regulation of pattern recognition receptor signaling pathway	9/1406	45/18903	0.00523176	0.0308964	0.0223734	DDX3X/ZDHHC5/PUM2/HMGB1/DDX60/RTN4/IFI35/CAV1/FLOT1	9
BP	GO:0045229	external encapsulating structure organization	37/1406	321/18903	0.00526783	0.0310775	0.0225045	RIC8A/ABL1/ITGB1/COLGALT1/LAMC1/APP/ADAM15/CTSS/LCP1/B4GALT1/FERMT1/CAV2/COL17A1/DAG1/LAMB3/DDR1/SOX9/PRDX4/LAMB1/FSCN1/FURIN/MMP14/TGFBI/P4HA1/CAV1/COL12A1/ANXA2/COL5A2/SERPINH1/FLOT1/MMP12/SERPINB5/FBLN2/TNFRSF1A/TGFB1/CST3/FKBP10	37
BP	GO:1901983	regulation of protein acetylation	14/1406	88/18903	0.00529233	0.03119	0.022586	BAZ1B/DEK/CTCF/PYGO2/DDX21/SET/DDX3X/SMARCA5/SF3B1/TAF7/SMARCB1/SOX4/ZMPSTE24/SNAI2	14
BP	GO:0009651	response to salt stress	7/1406	30/18903	0.00552906	0.0324522	0.0235	XRCC5/HSP90AA1/HSP90AB1/TP53/ZFP36L1/CLDN1/FBP1	7
BP	GO:0044819	mitotic G1/S transition checkpoint signaling	7/1406	30/18903	0.00552906	0.0324522	0.0235	PRKDC/CDKN1B/CDK2/RPA2/TP53/PLK2/RPL26	7
BP	GO:0060142	regulation of syncytium formation by plasma membrane fusion	7/1406	30/18903	0.00552906	0.0324522	0.0235	CAPN2/CXCL9/ADAM9/CXCL10/EHD2/CD53/FLOT1	7
BP	GO:1902230	negative regulation of intrinsic apoptotic signaling pathway in response to DNA damage	7/1406	30/18903	0.00552906	0.0324522	0.0235	KDM1A/CD74/CD44/TPT1/SNAI2/BCL2L1/ZNF385A	7
BP	GO:0032387	negative regulation of intracellular transport	11/1406	62/18903	0.00557337	0.0325941	0.0236028	NUP153/TPR/LMAN1/SNX12/SUMO1/GDI1/RANGAP1/FERMT1/BAG3/OS9/SNX3	11
BP	GO:0090303	positive regulation of wound healing	11/1406	62/18903	0.00557337	0.0325941	0.0236028	ITGB1/NFE2L2/ACTG1/FERMT1/ST3GAL4/F3/CLDN1/PLAU/THBS1/ANXA1/THBD	11
BP	GO:0050779	RNA destabilization	16/1406	107/18903	0.00557591	0.0325941	0.0236028	DHX9/HNRNPU/PATL1/CNOT1/SAMD4B/PAIP1/YTHDF2/SYNCRIP/KHSRP/CSDE1/YTHDF1/HNRNPD/POLR2G/ZFP36L1/TNKS1BP1/ZFP36L2	16
BP	GO:0061014	positive regulation of mRNA catabolic process	16/1406	107/18903	0.00557591	0.0325941	0.0236028	DHX9/HNRNPU/PATL1/CNOT1/SAMD4B/PAIP1/YTHDF2/SYNCRIP/KHSRP/CSDE1/YTHDF1/HNRNPD/POLR2G/ZFP36L1/TNKS1BP1/ZFP36L2	16
BP	GO:0046794	transport of virus	6/1406	23/18903	0.00562321	0.0328373	0.0237788	NUP153/KPNA2/CAV2/BST2/CAV1/CTSL	6
BP	GO:0071674	mononuclear cell migration	26/1406	206/18903	0.00562943	0.0328402	0.023781	WNK1/ABL1/AKIRIN1/HMGB1/CD47/APP/RHOA/CALR/MSN/CDC42/PLEC/CREB3/ICAM1/CXCL16/CXCL10/CCR7/MDK/CRKL/CSF1R/C1QBP/CXCL11/RPS19/THBS1/ANXA1/CXCL13/CCL20	26
BP	GO:0043401	steroid hormone mediated signaling pathway	19/1406	136/18903	0.00571883	0.033328	0.0241342	CNOT1/DAXX/ARID1A/DNAJA1/PARP1/PTGES3/YWHAH/NCOA4/HDAC1/TAF7/RHOA/CALR/DDX5/KDM1A/DDX17/TP63/FKBP4/PHB2/PMEPA1	19
BP	GO:0010001	glial cell differentiation	28/1406	227/18903	0.00573476	0.033387	0.0241769	STAT3/PRMT5/ABL1/PTPN11/CNP/CDK1/PRPF19/CTNNB1/APP/HDAC1/NCSTN/RHOA/B4GALT5/PLEC/IFNGR1/SOX4/ITGB4/DAG1/WDR1/SOX9/MDK/SOX2/ANO1/MAL/GRN/TGFB1/NDRG1/GPC1	28
BP	GO:0006487	protein N-linked glycosylation	12/1406	71/18903	0.00580757	0.0337085	0.0244097	MAGT1/EXT2/RPN1/RPN2/MLEC/DDOST/B4GALT1/DPM1/STT3B/OSTC/DAD1/OST4	12
BP	GO:0009988	cell-cell recognition	12/1406	71/18903	0.00580757	0.0337085	0.0244097	UBAP2L/CCT5/CCT3/TCP1/CCT8/CCT4/NCK2/MSN/B4GALT1/CCT7/CCR7/CD9	12
BP	GO:0070527	platelet aggregation	12/1406	71/18903	0.00580757	0.0337085	0.0244097	RAP2B/TLN1/MYH9/ACTB/ACTG1/MYL12A/CLIC1/HSPB1/FN1/PPIA/FLNA/CD9	12
BP	GO:0000079	regulation of cyclin-dependent protein serine/threonine kinase activity	17/1406	117/18903	0.00585087	0.0339256	0.0245669	IPO5/CCNA2/PLK1/IPO7/PSMD10/CKS1B/CDKN1B/CCNB1/CCNB2/CCNI/CDKN2A/CDKN2B/ACTB/TNFAIP3/EGFR/CKS2/GADD45A	17
BP	GO:0048678	response to axon injury	14/1406	89/18903	0.00586141	0.0339525	0.0245864	CERS2/CDK1/CTNNA1/PTPRF/RANGAP1/AXL/DAG1/TSPO/SOD2/TNC/FLNA/JUN/GRN/DPYSL3	14
BP	GO:0014009	glial cell proliferation	10/1406	54/18903	0.00590252	0.0341219	0.0247091	CERS2/PPP1CC/E2F1/CDKN2B/TP53/SLC7A5/SOX4/TSPO/CSF1R/AREG	10
BP	GO:0051293	establishment of spindle localization	10/1406	54/18903	0.00590252	0.0341219	0.0247091	KPNB1/DCTN1/PLK1/NUSAP1/DYNC1H1/MAPRE1/ITGB1/MYH9/CFL1/GJA1	10
BP	GO:0006270	DNA replication initiation	8/1406	38/18903	0.0060121	0.0346856	0.0251173	MCM6/MCM2/MCM4/CIZ1/MCM3/MCM7/CDK2/MCM5	8
BP	GO:0090504	epiboly	8/1406	38/18903	0.0060121	0.0346856	0.0251173	ITGB1/RHOA/FERMT1/DDR1/CD44/FLNA/RHOC/MMP12	8
BP	GO:0010837	regulation of keratinocyte proliferation	9/1406	46/18903	0.00608442	0.0350677	0.025394	EFNB2/CDH3/TP63/ZFP36L1/MDK/SNAI2/SRSF6/IRF6/AREG	9
BP	GO:0001959	regulation of cytokine-mediated signaling pathway	22/1406	167/18903	0.00630111	0.0362196	0.0262281	ADAR/OAS3/PARP9/PARP14/YTHDF2/PTPN1/PTPN11/IRAK1/SAMHD1/LSM14A/STAT2/HIF1A/TNFAIP3/IRF7/OAS1/AXL/CD74/CAV1/MMP12/TNFRSF1A/LAPTM5/CPNE1	22
BP	GO:0010976	positive regulation of neuron projection development	21/1406	157/18903	0.0063064	0.0362196	0.0262281	ACTR2/ADNP/CAPRIN1/ABL1/HSPA5/NFE2L2/TWF1/SCARB2/TMEM30A/KDM1A/ITGA6/PTK7/DBN1/ITGA3/SNX3/TUBB2B/MDK/FLNA/PLXNB2/GRN/DPYSL3	21
BP	GO:0032615	interleukin-12 production	11/1406	63/18903	0.00630947	0.0362196	0.0262281	HMGB1/CD47/IRF1/HSPD1/HLA-B/CCR7/MDK/C1QBP/THBS1/LAPTM5/IDO1	11
BP	GO:0032655	regulation of interleukin-12 production	11/1406	63/18903	0.00630947	0.0362196	0.0262281	HMGB1/CD47/IRF1/HSPD1/HLA-B/CCR7/MDK/C1QBP/THBS1/LAPTM5/IDO1	11
BP	GO:0043200	response to amino acid	17/1406	118/18903	0.00637501	0.0365594	0.0264742	DNMT1/IPO5/PCNA/CDKN1B/HNRNPD/RRAGA/RHOA/HNRNPAB/CAPN2/MYD88/SLC7A5/TMBIM6/LAMTOR4/CYBB/EGFR/BCL2L1/COL5A2	17
BP	GO:0019318	hexose metabolic process	28/1406	229/18903	0.00645784	0.0367744	0.0266299	WDTC1/DDB1/POFUT1/WDR5/PMAIP1/ARPP19/PGM1/ADIPOR1/USP7/PGK1/PGM2/B4GALT1/ENO1/TPI1/TP53/PFKP/OAS1/HK1/ZMPSTE24/MDH2/ENO2/GPI/PKM/IGF2/IGFBP4/FBP1/IGFBP3/GAPDH	28
BP	GO:0018108	peptidyl-tyrosine phosphorylation	42/1406	380/18903	0.00648483	0.0367744	0.0266299	BAZ1B/PAK2/SNX6/PARP9/PARP14/YES1/MELK/ADNP/HAX1/PTPN1/ABL1/PTPN11/JAK1/PPP2CA/RAP2B/APP/NCL/NCK2/SHC1/TP53/MET/PRNP/PPP2R1A/AXL/CADM4/DDR1/CD74/EGFR/CD44/SPINK1/CSF1R/CAV1/PKM/IGF2/EFEMP1/TNFRSF1A/TGFB1/ERRFI1/FGFR3/EPHB6/EFNA1/AREG	42
BP	GO:0071248	cellular response to metal ion	25/1406	198/18903	0.00650812	0.0367744	0.0266299	ECT2/DAXX/IQGAP1/PARP1/HSPA5/CDKN1B/APP/NCSTN/B2M/SUMO1/NFE2L2/CALR/CLIC4/PRNP/TSPO/CYBB/EGFR/CLDN1/JUN/CDH1/FBP1/JUND/SLC40A1/CPNE1/SYT8	25
BP	GO:0045911	positive regulation of DNA recombination	12/1406	72/18903	0.00650923	0.0367744	0.0266299	ACTR2/MSH2/TIMELESS/ACTL6A/PARP1/FUS/MORF4L1/HMCES/MORF4L2/ACTB/TFRC/TGFB1	12
BP	GO:1903317	regulation of protein maturation	12/1406	72/18903	0.00650923	0.0367744	0.0266299	SNX12/MYH9/ENO1/PRNP/MAGEA3/SOX4/CTSZ/CAST/MMP14/PLAU/ANXA2/THBS1	12
BP	GO:0009150	purine ribonucleotide metabolic process	48/1406	447/18903	0.00654811	0.0367744	0.0266299	STAT3/ACLY/HSPA8/VCP/ATP6V1A/PARP1/DLST/OGDH/RAN/PRPS2/PGM1/APP/PAICS/ELOVL5/RHOA/STOML2/HIF1A/PGK1/LDHA/GIT1/SLC35B2/ENO1/TPI1/AK3/HPRT1/PFKP/PPT1/PGAM1/NT5E/ATP1B1/HK1/NME3/HMGCS1/NDUFB10/TSPO/NDUFA1/IMPDH1/HINT1/ENO2/GPI/PKM/NDUFB7/FBP1/EIF6/TGFB1/NDUFS2/GAPDH/APRT	48
BP	GO:0032272	negative regulation of protein polymerization	13/1406	81/18903	0.00655191	0.0367744	0.0266299	MTPN/CAPZA1/SPTAN1/MAPRE1/FLII/SPTBN1/TWF1/STMN1/PFN2/FKBP4/SSH3/CAPZB/PFN1	13
BP	GO:0007135	meiosis II	5/1406	17/18903	0.00656518	0.0367744	0.0266299	SMC1A/SMC3/STAG2/RAD21/PPP2R1A	5
BP	GO:0031268	pseudopodium organization	5/1406	17/18903	0.00656518	0.0367744	0.0266299	CDC42/CDC42EP4/CDC42EP5/CCR7/CDC42EP1	5
BP	GO:0043923	positive regulation by host of viral transcription	5/1406	17/18903	0.00656518	0.0367744	0.0266299	SNW1/NUCKS1/TAF11/SMARCB1/JUN	5
BP	GO:0045198	establishment of epithelial cell apical/basal polarity	5/1406	17/18903	0.00656518	0.0367744	0.0266299	RHOA/MSN/CDC42/PTK7/SLC9A3R1	5
BP	GO:0061983	meiosis II cell cycle process	5/1406	17/18903	0.00656518	0.0367744	0.0266299	SMC1A/SMC3/STAG2/RAD21/PPP2R1A	5
BP	GO:0090594	inflammatory response to wounding	5/1406	17/18903	0.00656518	0.0367744	0.0266299	HIF1A/GIT1/MDK/GRN/TGFB1	5
BP	GO:1902036	regulation of hematopoietic stem cell differentiation	5/1406	17/18903	0.00656518	0.0367744	0.0266299	PRKDC/YTHDF2/ABL1/NFE2L2/HSPA9	5
BP	GO:0031293	membrane protein intracellular domain proteolysis	4/1406	11/18903	0.00657874	0.0367744	0.0266299	APH1A/NCSTN/ADAM9/TGFB1	4
BP	GO:0036363	transforming growth factor beta activation	4/1406	11/18903	0.00657874	0.0367744	0.0266299	ITGAV/HSP90AB1/ITGB6/FURIN	4
BP	GO:0036490	regulation of translation in response to endoplasmic reticulum stress	4/1406	11/18903	0.00657874	0.0367744	0.0266299	EIF4G1/DDX3X/TMED2/NCK2	4
BP	GO:0042451	purine nucleoside biosynthetic process	4/1406	11/18903	0.00657874	0.0367744	0.0266299	PGM2/HPRT1/NT5E/APRT	4
BP	GO:0042455	ribonucleoside biosynthetic process	4/1406	11/18903	0.00657874	0.0367744	0.0266299	PGM2/HPRT1/NT5E/APRT	4
BP	GO:0043320	natural killer cell degranulation	4/1406	11/18903	0.00657874	0.0367744	0.0266299	LAMP1/HLA-F/FCGR3A/NKG7	4
BP	GO:0045472	response to ether	4/1406	11/18903	0.00657874	0.0367744	0.0266299	LARP1/GOLPH3/HNRNPD/CDK4	4
BP	GO:0046129	purine ribonucleoside biosynthetic process	4/1406	11/18903	0.00657874	0.0367744	0.0266299	PGM2/HPRT1/NT5E/APRT	4
BP	GO:0048563	post-embryonic animal organ morphogenesis	4/1406	11/18903	0.00657874	0.0367744	0.0266299	HMGN1/BAK1/EFEMP1/MFAP2	4
BP	GO:0061418	regulation of transcription from RNA polymerase II promoter in response to hypoxia	4/1406	11/18903	0.00657874	0.0367744	0.0266299	NFE2L2/HIF1A/TP53/EGR1	4
BP	GO:0071803	positive regulation of podosome assembly	4/1406	11/18903	0.00657874	0.0367744	0.0266299	RHOA/LCP1/MSN/FSCN1	4
BP	GO:1901844	regulation of cell communication by electrical coupling involved in cardiac conduction	4/1406	11/18903	0.00657874	0.0367744	0.0266299	CALM3/CALM2/CALM1/CAV1	4
BP	GO:0033673	negative regulation of kinase activity	29/1406	240/18903	0.00664924	0.0371304	0.0268877	ADAR/HNRNPU/PAK2/NUP62/IPO5/SNX6/PLK1/IPO7/YWHAG/DNAJA1/PTPN1/ABL1/PRKAR1A/CDKN1B/PIP4K2C/CORO1C/TAF7/CDKN2A/CDKN2B/PLEC/TNFAIP3/PRDX3/NPM1/HSPB1/PPIA/CAV1/GADD45A/ERRFI1/UCHL1	29
BP	GO:0030038	contractile actin filament bundle assembly	16/1406	109/18903	0.00667573	0.0371304	0.0268877	PAK2/ABL1/WASF2/TNFAIP1/CD47/RHOA/CDC42/STMN1/PFN2/ACTG1/MET/RAC1/ZYX/ITGB5/RHOC/PFN1	16
BP	GO:0043149	stress fiber assembly	16/1406	109/18903	0.00667573	0.0371304	0.0268877	PAK2/ABL1/WASF2/TNFAIP1/CD47/RHOA/CDC42/STMN1/PFN2/ACTG1/MET/RAC1/ZYX/ITGB5/RHOC/PFN1	16
BP	GO:0006099	tricarboxylic acid cycle	7/1406	31/18903	0.00669193	0.0371304	0.0268877	CS/DLST/OGDH/MDH1/FH/MDH2/IDH2	7
BP	GO:0098901	regulation of cardiac muscle cell action potential	7/1406	31/18903	0.00669193	0.0371304	0.0268877	ATP2A2/DSG2/CALM3/DSP/CALM1/CAV1/JUP	7
BP	GO:1900027	regulation of ruffle assembly	7/1406	31/18903	0.00669193	0.0371304	0.0268877	RCC2/CORO1C/PFN2/ICAM1/RHOG/CAV1/PFN1	7
BP	GO:1902042	negative regulation of extrinsic apoptotic signaling pathway via death domain receptors	7/1406	31/18903	0.00669193	0.0371304	0.0268877	DDX3X/HMGB2/PEA15/ICAM1/TNFAIP3/RAF1/BCL2L1	7
BP	GO:0018205	peptidyl-lysine modification	45/1406	414/18903	0.00669406	0.0371304	0.0268877	HCFC1/BAZ1B/DEK/DNMT1/SNW1/CTCF/ACTL6A/POLE3/NAA50/PYGO2/DDX21/SET/UBA2/IFIH1/SF3B3/WDR82/JARID2/WDR5/SMARCA5/SAE1/SUMO3/CTNNB1/SF3B1/BAG6/MORF4L1/USP22/TAF7/MORF4L2/SUMO1/SUMO2/RANGAP1/TRIM28/ACTB/KDM1A/PLOD2/SMARCB1/SOX4/NELFE/ZMPSTE24/PLOD1/HINT1/SNAI2/EGR1/LMNA/FKBP10	45
BP	GO:0043616	keratinocyte proliferation	10/1406	55/18903	0.00674468	0.0373751	0.0270649	EFNB2/CDH3/FERMT1/TP63/ZFP36L1/MDK/SNAI2/SRSF6/IRF6/AREG	10
BP	GO:0097530	granulocyte migration	21/1406	158/18903	0.00677808	0.0375092	0.027162	AKIRIN1/MYD88/CXCL9/RAC1/CXCL10/WDR1/CD74/CCR7/MDK/RAC2/PPIA/CSF1R/RHOG/C1QBP/CXCL11/THBS1/ANXA1/CXCL13/CXCL1/CCL20/FCER1G	21
BP	GO:0030100	regulation of endocytosis	26/1406	209/18903	0.00678813	0.0375092	0.027162	HNRNPK/PTPN1/ABL1/ARF6/SNX12/UBQLN2/PICALM/RAB5C/CALM3/B2M/SDCBP/EFNB2/ITGAV/CDC42/SNX17/ARF1/AP2M1/ITGA2/PPT1/RAC1/RAB31/AXL/CD63/CAV1/ANXA2/FLOT1	26
BP	GO:0070661	leukocyte proliferation	39/1406	348/18903	0.00678844	0.0375092	0.027162	ABL1/HMGB1/PRKAR1A/CTNNB1/SLC7A1/IRF1/NCSTN/ZBTB7B/CTPS1/MYD88/NCK2/MSN/CD276/HLA-E/HSPD1/TP53/HPRT1/TFRC/TNFAIP3/HLA-A/PRNP/PLA2G2F/HLA-DPA1/CD74/FCGR3A/AHR/RAC2/CSF1R/BST2/BCL2L1/IGF2/CNN2/HLA-DRB1/VSIG4/HLA-DPB1/ANXA1/EFNB1/IDO1/RPS6	39
BP	GO:0031398	positive regulation of protein ubiquitination	17/1406	119/18903	0.00693654	0.0382705	0.0277133	HUWE1/UBQLN1/PLK1/DDX3X/PSMD10/HSPA5/CDC20/PEF1/UBE2C/KDM1A/ARRDC3/RPS2/NPM1/PTTG1IP/CAV1/FKBP1A/LAPTM5	17
BP	GO:0097306	cellular response to alcohol	15/1406	100/18903	0.00693953	0.0382705	0.0277133	LARP1/GNB1/GOLPH3/CTNNA1/CTNNB1/ADAM15/CDK4/DAG1/SOD2/CYBB/AHR/CDH1/FBP1/AKR1C2/JUP	15
BP	GO:0002755	MyD88-dependent toll-like receptor signaling pathway	6/1406	24/18903	0.00703379	0.0384566	0.027848	IRAK1/IRF1/MYD88/HSPD1/TNIP1/IRF7	6
BP	GO:0006925	inflammatory cell apoptotic process	6/1406	24/18903	0.00703379	0.0384566	0.027848	TCP1/CDKN2A/IRF7/ZMPSTE24/ANXA1/CTSL	6
BP	GO:0035458	cellular response to interferon-beta	6/1406	24/18903	0.00703379	0.0384566	0.027848	STAT1/IFI16/IRF1/CAPN2/OAS1/AIM2	6
BP	GO:0036010	protein localization to endosome	6/1406	24/18903	0.00703379	0.0384566	0.027848	DTX3L/ARF6/MSN/MICALL1/TMEM30A/EZR	6
BP	GO:0060143	positive regulation of syncytium formation by plasma membrane fusion	6/1406	24/18903	0.00703379	0.0384566	0.027848	CAPN2/CXCL9/ADAM9/EHD2/CD53/FLOT1	6
BP	GO:0061162	establishment of monopolar cell polarity	6/1406	24/18903	0.00703379	0.0384566	0.027848	RHOA/MSN/CDC42/PTK7/FSCN1/SLC9A3R1	6
BP	GO:0045646	regulation of erythrocyte differentiation	9/1406	47/18903	0.00704012	0.0384566	0.027848	PRKDC/STAT3/STAT1/HMGB2/B2M/HIF1A/HSPA9/MAFB/ZFP36L1	9
BP	GO:0090199	regulation of release of cytochrome c from mitochondria	9/1406	47/18903	0.00704012	0.0384566	0.027848	PSMD10/PMAIP1/TNFSF10/GHITM/TP53/BAK1/PDCD5/BCL2L1/LMNA	9
BP	GO:0097028	dendritic cell differentiation	9/1406	47/18903	0.00704012	0.0384566	0.027848	HMGB1/HLA-B/AXL/DHRS2/BATF/CCR7/ITGB6/UBD/TMEM176B	9
BP	GO:1902459	positive regulation of stem cell population maintenance	9/1406	47/18903	0.00704012	0.0384566	0.027848	ACTL6A/ARID1A/RBBP7/RBBP4/SMARCC1/HDAC1/ACTB/TP63/SMARCB1	9
BP	GO:0032570	response to progesterone	8/1406	39/18903	0.00708102	0.0385677	0.0279285	TYMS/TSPO/CAV1/GPI/TXNIP/THBS1/GJB2/TGFB1	8
BP	GO:0051569	regulation of histone H3-K4 methylation	8/1406	39/18903	0.00708102	0.0385677	0.0279285	HCFC1/DNMT1/SNW1/PYGO2/WDR5/CTNNB1/KDM1A/NELFE	8
BP	GO:1905168	positive regulation of double-strand break repair via homologous recombination	8/1406	39/18903	0.00708102	0.0385677	0.0279285	ACTR2/TIMELESS/ACTL6A/PARP1/FUS/MORF4L1/MORF4L2/ACTB	8
BP	GO:0018212	peptidyl-tyrosine modification	42/1406	382/18903	0.00708729	0.0385677	0.0279285	BAZ1B/PAK2/SNX6/PARP9/PARP14/YES1/MELK/ADNP/HAX1/PTPN1/ABL1/PTPN11/JAK1/PPP2CA/RAP2B/APP/NCL/NCK2/SHC1/TP53/MET/PRNP/PPP2R1A/AXL/CADM4/DDR1/CD74/EGFR/CD44/SPINK1/CSF1R/CAV1/PKM/IGF2/EFEMP1/TNFRSF1A/TGFB1/ERRFI1/FGFR3/EPHB6/EFNA1/AREG	42
BP	GO:1903008	organelle disassembly	19/1406	139/18903	0.00722621	0.0392865	0.028449	HUWE1/DENR/HAX1/MFN2/AURKA/VCP/SLC25A5/CDK1/SREBF2/KIF5B/PLIN3/OPTN/HIF1A/TP53/WDR45B/TSPO/PHB2/SQSTM1/PLIN2	19
BP	GO:0008333	endosome to lysosome transport	12/1406	73/18903	0.00727612	0.0395206	0.0286185	DTX3L/M6PR/VCP/SNAPIN/CHMP5/RAB7A/CHMP1B/ARL8B/CHMP2B/CHMP1A/PLEKHF1/CHMP2A	12
BP	GO:0045786	negative regulation of cell cycle	44/1406	405/18903	0.00733276	0.0397906	0.028814	BAZ1B/IPO5/PRKDC/MSH2/TIMELESS/RAD21/PLK1/CTDSP2/IPO7/CDCA8/NSUN2/TPR/ABL1/PTPN11/ZWINT/SMARCA5/CDK1/CDKN1B/CCNB1/PRPF19/CTNNB1/CDK2/RPA2/BTG3/BIRC5/CDC20/AURKB/E2F1/CDKN2A/CDKN2B/PTTG1/TP53/TNFAIP3/ZFP36L1/RNF167/NPM1/PLK2/ZFP36L2/ATF5/SOX2/TGFB1/SLC9A3R1/RPL26/CHMP2A	44
BP	GO:1902105	regulation of leukocyte differentiation	36/1406	317/18903	0.00738242	0.0400223	0.0289818	PRKDC/ACTL6A/HAX1/ARID1A/ABL1/KLF10/HMGB1/SMARCC1/CTNNB1/XRCC6/IRF1/ZBTB7B/RHOA/CLPTM1/MAFB/ACTB/HLA-B/IRF7/ZFP36L1/SMARCB1/HLA-DRA/SOX4/AXL/BATF/CD74/HMGB3/MDK/C1QC/ZFP36L2/MMP14/MYC/HLA-DRB1/TESC/TGFB1/ANXA1/TMEM176B	36
BP	GO:0097529	myeloid leukocyte migration	29/1406	242/18903	0.00744523	0.0403248	0.0292009	AKIRIN1/HMGB1/CD47/MYD88/CREB3/B4GALT1/CXCL9/RAC1/CXCL10/WDR1/CD74/CCR7/MDK/RAC2/PPIA/MMP14/CSF1R/RHOG/C1QBP/CXCL11/RPS19/CNN2/THBS1/ANXA1/CXCL13/CXCL1/CCL20/FCER1G/CD9	29
BP	GO:0001954	positive regulation of cell-matrix adhesion	10/1406	56/18903	0.00767702	0.0414631	0.0300252	ABL1/MAP4K4/RIN2/FERMT1/RAC1/DAG1/POLDIP2/CCR7/JUP/CIB1	10
BP	GO:0009116	nucleoside metabolic process	10/1406	56/18903	0.00767702	0.0414631	0.0300252	ICMT/PGM2/ERH/HPRT1/TK1/TYMP/AHCY/NT5E/CDA/APRT	10
BP	GO:0043470	regulation of carbohydrate catabolic process	10/1406	56/18903	0.00767702	0.0414631	0.0300252	STAT3/APP/HIF1A/GIT1/SCARB2/TP53/PGAM1/PPP1CA/FBP1/EIF6	10
BP	GO:0071621	granulocyte chemotaxis	18/1406	130/18903	0.00770218	0.04156	0.0300953	AKIRIN1/CXCL9/RAC1/CXCL10/CD74/CCR7/MDK/RAC2/PPIA/CSF1R/C1QBP/CXCL11/THBS1/ANXA1/CXCL13/CXCL1/CCL20/FCER1G	18
BP	GO:0098876	vesicle-mediated transport to the plasma membrane	20/1406	150/18903	0.00782691	0.0421934	0.030554	ATP2C1/RAB14/ARF6/SNX12/VPS26A/GOLPH3/VAMP3/RAB7A/CLSTN1/SPTBN1/RAB10/OPTN/MICALL1/SNX17/SEC16A/RAB31/ARL4C/SNX3/EHD2/CMTM6	20
BP	GO:0006613	cotranslational protein targeting to membrane	7/1406	32/18903	0.008027	0.0431104	0.0312181	SRP72/SEC61A1/SSR3/SRP9/ARL6IP1/SSR2/TRAM1	7
BP	GO:0010165	response to X-ray	7/1406	32/18903	0.008027	0.0431104	0.0312181	MSH2/NUCKS1/XRCC6/XRCC5/TP53/ANXA1/THBD	7
BP	GO:0034389	lipid droplet organization	7/1406	32/18903	0.008027	0.0431104	0.0312181	RNF213/PTGFRN/PLIN3/SMIM22/SQLE/PPIA/PLIN2	7
BP	GO:1903955	positive regulation of protein targeting to mitochondrion	7/1406	32/18903	0.008027	0.0431104	0.0312181	HUWE1/SAE1/UBE2D3/SREBF2/PDCD5/RAC2/UBL5	7
BP	GO:0061912	selective autophagy	13/1406	83/18903	0.0080493	0.0431899	0.0312756	HUWE1/UBQLN1/SPTLC1/MFN2/SLC25A5/RAB7A/RNF213/OPTN/TP53/BAG3/PHB2/SQSTM1/HSPB8	13
BP	GO:0031648	protein destabilization	9/1406	48/18903	0.00810653	0.0433657	0.0314029	PRKDC/PLK1/TRIM21/RAD23A/SERF2/DAZAP2/PRNP/RNF5/CTSH	9
BP	GO:0045841	negative regulation of mitotic metaphase/anaphase transition	9/1406	48/18903	0.00810653	0.0433657	0.0314029	RAD21/PLK1/CDCA8/TPR/ZWINT/CCNB1/BIRC5/CDC20/AURKB	9
BP	GO:0071985	multivesicular body sorting pathway	9/1406	48/18903	0.00810653	0.0433657	0.0314029	UBAP1/VCP/CHMP5/CHMP1B/TMEM50A/LAPTM4B/CHMP2B/CHMP1A/CHMP2A	9
BP	GO:0051298	centrosome duplication	12/1406	74/18903	0.00811223	0.0433657	0.0314029	XPO1/CKAP5/NUP62/CHMP5/CDK2/CHMP1B/CHMP2B/CHMP1A/FBXW5/NPM1/PLK2/CHMP2A	12
BP	GO:0030098	lymphocyte differentiation	45/1406	419/18903	0.00825304	0.0440149	0.031873	PRKDC/STAT3/MSH2/ACTL6A/ARID1A/ABL1/HMGB1/ITGB1/SLC25A5/IRF2BP2/SMARCC1/CTNNB1/XRCC6/IRF1/ZBTB7B/B2M/RHOA/CLPTM1/MAFB/KLF6/ACTB/TP53/LRRC8A/BAK1/ZFP36L1/SMARCB1/HLA-DRA/SOX4/AXL/BATF/CD74/CCR7/HMGB3/MDK/ZFP36L2/MMP14/HLA-DRB1/EGR1/KDELR1/ANXA1/CTSL/SLC39A7/FCER1G/RPS6/TOP2B	45
BP	GO:0016482	cytosolic transport	22/1406	171/18903	0.00828517	0.0440149	0.031873	ACTR2/SNX6/DCTN1/RAB14/SNX12/VPS26A/CLTC/VAMP3/YKT6/RAB7A/LAMP1/MYO1D/KIF5B/KIF1C/RAB6A/USP7/MSN/ARL8B/SNX3/FLNA/LAPTM5/EZR	22
BP	GO:0046661	male sex differentiation	22/1406	171/18903	0.00828517	0.0440149	0.031873	SF1/MSH2/CSDE1/NASP/CTNNA1/CTNNB1/NCOA4/ADAM15/HMGB2/ATN1/EIF2S2/TNFSF10/FKBP4/YBX3/SOX9/PRDX4/CRKL/DHCR24/MMP14/BCL2L1/MEA1/TESC	22
BP	GO:0000184	nuclear-transcribed mRNA catabolic process, nonsense-mediated decay	8/1406	40/18903	0.00828722	0.0440149	0.031873	SMG5/ETF1/EIF4A3/CASC3/HNRNPAB/RBM8A/GSPT1/MAGOH	8
BP	GO:0043001	Golgi to plasma membrane protein transport	8/1406	40/18903	0.00828722	0.0440149	0.031873	ATP2C1/GOLPH3/VAMP3/SPTBN1/RAB10/OPTN/SEC16A/RAB31	8
BP	GO:1990000	amyloid fibril formation	8/1406	40/18903	0.00828722	0.0440149	0.031873	FUS/APP/VBP1/B2M/HNRNPA1/FURIN/PFDN5/FKBP1A	8
BP	GO:2000758	positive regulation of peptidyl-lysine acetylation	8/1406	40/18903	0.00828722	0.0440149	0.031873	BAZ1B/DEK/DDX21/SMARCA5/SF3B1/SMARCB1/SOX4/SNAI2	8
BP	GO:0006163	purine nucleotide metabolic process	50/1406	476/18903	0.00845557	0.0448676	0.0324905	STAT3/ACLY/HSPA8/VCP/ATP6V1A/PARP1/SAMHD1/DLST/PRPS1/OGDH/RAN/PRPS2/PGM1/APP/PAICS/ELOVL5/RHOA/STOML2/HIF1A/PGK1/LDHA/GIT1/SLC35B2/ENO1/TPI1/AK3/HPRT1/PFKP/PPT1/PGAM1/NT5E/ATP1B1/HK1/NME3/HMGCS1/NDUFB10/TSPO/NDUFA1/IMPDH1/HINT1/ENO2/GPI/PKM/NDUFB7/FBP1/EIF6/TGFB1/NDUFS2/GAPDH/APRT	50
BP	GO:0006978	DNA damage response, signal transduction by p53 class mediator resulting in transcription of p21 class mediator	5/1406	18/18903	0.00854199	0.0449941	0.0325821	FOXM1/COPS3/TP53/ZNF385A/RPL26	5
BP	GO:0010755	regulation of plasminogen activation	5/1406	18/18903	0.00854199	0.0449941	0.0325821	ENO1/CTSZ/PLAU/ANXA2/THBS1	5
BP	GO:0034138	toll-like receptor 3 signaling pathway	5/1406	18/18903	0.00854199	0.0449941	0.0325821	UBQLN1/TNFAIP3/OAS1/CAV1/FLOT1	5
BP	GO:0036499	PERK-mediated unfolded protein response	5/1406	18/18903	0.00854199	0.0449941	0.0325821	PTPN1/HSPA5/TMED2/NFE2L2/NCK2	5
BP	GO:0045945	positive regulation of transcription by RNA polymerase III	5/1406	18/18903	0.00854199	0.0449941	0.0325821	BAZ1B/DEK/DDX21/SMARCA5/SF3B1	5
BP	GO:0071786	endoplasmic reticulum tubular network organization	5/1406	18/18903	0.00854199	0.0449941	0.0325821	ATL2/RAB10/RTN3/ARL6IP1/RTN4	5
BP	GO:0072567	chemokine (C-X-C motif) ligand 2 production	5/1406	18/18903	0.00854199	0.0449941	0.0325821	OAS3/HMGB1/MYD88/OAS1/CD74	5
BP	GO:2000341	regulation of chemokine (C-X-C motif) ligand 2 production	5/1406	18/18903	0.00854199	0.0449941	0.0325821	OAS3/HMGB1/MYD88/OAS1/CD74	5
BP	GO:0045814	negative regulation of gene expression, epigenetic	14/1406	93/18903	0.00864622	0.045283	0.0327913	DNMT1/CTCF/POLE3/LMNB1/TPR/LMNB2/CBX3/HMGB1/SMARCA5/CDK2/HDAC1/TRIM28/KDM1A/LMNA	14
BP	GO:0036503	ERAD pathway	16/1406	112/18903	0.00864645	0.045283	0.0327913	UBQLN1/USP14/CANX/VCP/UBXN4/HSPA5/UBQLN2/BAG6/HSP90B1/NFE2L2/CALR/CCDC47/STT3B/OS9/RNF5/CAV1	16
BP	GO:0031468	nuclear membrane reassembly	6/1406	25/18903	0.00868344	0.045283	0.0327913	CHMP5/CHMP1B/CHMP2B/CHMP1A/RCC1/CHMP2A	6
BP	GO:0031579	membrane raft organization	6/1406	25/18903	0.00868344	0.045283	0.0327913	PPT1/CAV2/CAV1/ANXA2/FLOT1/MAL	6
BP	GO:0032469	endoplasmic reticulum calcium ion homeostasis	6/1406	25/18903	0.00868344	0.045283	0.0327913	ATP2A2/APP/CCDC47/BAK1/TMBIM6/GRINA	6
BP	GO:0042659	regulation of cell fate specification	6/1406	25/18903	0.00868344	0.045283	0.0327913	CHD4/RBBP7/RBBP4/HDAC1/MTA2/ESRP1	6
BP	GO:0046033	AMP metabolic process	6/1406	25/18903	0.00868344	0.045283	0.0327913	PRPS2/PAICS/AK3/HPRT1/NT5E/APRT	6
BP	GO:0051984	positive regulation of chromosome segregation	6/1406	25/18903	0.00868344	0.045283	0.0327913	HNRNPU/CDCA8/RCC2/CCNB1/BIRC5/AURKB	6
BP	GO:0061339	establishment or maintenance of monopolar cell polarity	6/1406	25/18903	0.00868344	0.045283	0.0327913	RHOA/MSN/CDC42/PTK7/FSCN1/SLC9A3R1	6
BP	GO:0090023	positive regulation of neutrophil chemotaxis	6/1406	25/18903	0.00868344	0.045283	0.0327913	RAC1/CD74/CCR7/MDK/RAC2/C1QBP	6
BP	GO:1903077	negative regulation of protein localization to plasma membrane	6/1406	25/18903	0.00868344	0.045283	0.0327913	CLTC/PICALM/GBP1/AP2M1/BCL2L1/TGFB1	6
BP	GO:0002698	negative regulation of immune effector process	17/1406	122/18903	0.00886432	0.0461844	0.0334441	CD47/ZBTB7B/HLA-E/HLA-B/HLA-A/HLA-F/TMBIM6/AXL/AHR/SERPING1/BST2/RPS19/CD59/VSIG4/GRN/TGFB1/ANXA1	17
BP	GO:0006289	nucleotide-excision repair	13/1406	84/18903	0.00889269	0.0462484	0.0334904	RPA1/ACTL6A/ARID1A/DDB1/RAD23B/RAD23A/SMARCC1/RPA2/HMGN1/USP7/ACTB/TP53/SMARCB1	13
BP	GO:0010921	regulation of phosphatase activity	13/1406	84/18903	0.00889269	0.0462484	0.0334904	CALM3/PPP1R11/HSP90B1/GNA12/CALM2/PPP6R1/PPP1R9B/HSP90AB1/URI1/ITGA2/CALM1/GNAI2/FKBP1A	13
BP	GO:0061458	reproductive system development	35/1406	310/18903	0.00890715	0.0462818	0.0335146	SF1/MSH2/UBE2Q1/CSDE1/PTPN11/HSPA5/NASP/CDKN1B/CTNNA1/CTNNB1/NCOA4/ADAM15/HMGB2/ATN1/EIF2S2/PPP1R9B/TNFSF10/BAK1/TP63/FKBP4/YBX3/AXL/TNC/SOX9/PRDX4/CRKL/PSAP/DHCR24/MMP14/BASP1/BCL2L1/SERPINB5/MEA1/TESC/ANXA1	35
BP	GO:0009913	epidermal cell differentiation	28/1406	235/18903	0.00909422	0.0472111	0.0341876	PIP5K1A/CTNNB1/HDAC1/CLIC4/PLEC/MAFB/FLNB/DSP/FOSL2/CDH3/ESRP1/TP63/ZFP36L1/ADAM9/JAG1/KRT7/KRT6A/TXNIP/SRSF6/KRT5/EVPL/IRF6/ANXA1/ST14/ERRFI1/KRT8/SLC9A3R1/KRT6C	28
BP	GO:0030261	chromosome condensation	9/1406	49/18903	0.0092914	0.0474744	0.0343782	BAZ1B/PLK1/NCAPD2/TOP2A/NUSAP1/CDCA5/SMARCA5/CDK1/CHMP1A	9
BP	GO:0035307	positive regulation of protein dephosphorylation	9/1406	49/18903	0.0092914	0.0474744	0.0343782	PTBP1/PPP2R5D/CALM3/GNA12/CALM2/HSP90AB1/CALM1/PPIA/TGFB1	9
BP	GO:0002327	immature B cell differentiation	4/1406	12/18903	0.0092935	0.0474744	0.0343782	PRKDC/ABL1/IRF2BP2/LRRC8A	4
BP	GO:0006971	hypotonic response	4/1406	12/18903	0.0092935	0.0474744	0.0343782	CAB39/ITGA2/TSPO/FBP1	4
BP	GO:0010635	regulation of mitochondrial fusion	4/1406	12/18903	0.0092935	0.0474744	0.0343782	HUWE1/MTCH2/TFRC/VAT1	4
BP	GO:0032908	regulation of transforming growth factor beta1 production	4/1406	12/18903	0.0092935	0.0474744	0.0343782	ATP6AP2/LAPTM4B/FURIN/THBS1	4
BP	GO:0043248	proteasome assembly	4/1406	12/18903	0.0092935	0.0474744	0.0343782	PSMD10/PSMD11/POMP/ADRM1	4
BP	GO:0048548	regulation of pinocytosis	4/1406	12/18903	0.0092935	0.0474744	0.0343782	CDC42/PPT1/AXL/CAV1	4
BP	GO:0051095	regulation of helicase activity	4/1406	12/18903	0.0092935	0.0474744	0.0343782	MSH2/MCM2/TP53/IFIT1	4
BP	GO:0070601	centromeric sister chromatid cohesion	4/1406	12/18903	0.0092935	0.0474744	0.0343782	CTCF/NAA50/CTNNB1/PPP2R1A	4
BP	GO:0090232	positive regulation of spindle checkpoint	4/1406	12/18903	0.0092935	0.0474744	0.0343782	CDCA8/TPR/BIRC5/AURKB	4
BP	GO:0090267	positive regulation of mitotic cell cycle spindle assembly checkpoint	4/1406	12/18903	0.0092935	0.0474744	0.0343782	CDCA8/TPR/BIRC5/AURKB	4
BP	GO:0098911	regulation of ventricular cardiac muscle cell action potential	4/1406	12/18903	0.0092935	0.0474744	0.0343782	DSG2/DSP/CAV1/JUP	4
BP	GO:0099010	modification of postsynaptic structure	4/1406	12/18903	0.0092935	0.0474744	0.0343782	STAU1/RHOA/PFN2/PFN1	4
BP	GO:0099188	postsynaptic cytoskeleton organization	4/1406	12/18903	0.0092935	0.0474744	0.0343782	WASF2/ACTB/ACTG1/DBN1	4
BP	GO:1903800	positive regulation of miRNA maturation	4/1406	12/18903	0.0092935	0.0474744	0.0343782	DDX5/TP53/EGFR/TGFB1	4
BP	GO:1904667	negative regulation of ubiquitin protein ligase activity	4/1406	12/18903	0.0092935	0.0474744	0.0343782	RPS15/RPS20/RPL37/RPL11	4
BP	GO:1905245	regulation of aspartic-type peptidase activity	4/1406	12/18903	0.0092935	0.0474744	0.0343782	PICALM/TMED10/GRN/EFNA1	4
BP	GO:0001558	regulation of cell growth	45/1406	422/18903	0.00932658	0.0476012	0.03447	EIF4G1/MTPN/ADNP/EIF4G2/DDX3X/ABL1/CSNK2A1/PSMD10/RBBP7/PPP2CA/CDKN1B/CLSTN1/ADAM15/ADIPOR1/SDCBP/RHOA/PPP1R9B/CDKN2A/GDI1/CDC42/ENO1/URI1/TP53/PPT1/PPP2R1A/DBN1/CXCL16/RTN4/NPM1/TNC/DDR1/EGFR/NET1/FN1/CRKL/MMP14/BST2/CDA/CDH1/IGFBP4/FBP1/TGFB1/IGFBP3/GJA1/CIB1	45
BP	GO:0002456	T cell mediated immunity	16/1406	113/18903	0.00939767	0.0479215	0.0347019	HMGB1/TAP2/B2M/HLA-E/HSPD1/HLA-B/HPRT1/ICAM1/HLA-A/HLA-F/JAG1/HLA-DRA/CTSC/AHR/CTSH/HLA-DRB1	16
BP	GO:0000302	response to reactive oxygen species	25/1406	204/18903	0.00941414	0.0479629	0.0347319	ECT2/STAT1/ABL1/PCNA/CDK1/CAPN2/NFE2L2/HIF1A/SIGMAR1/BAK1/TNFAIP3/APEX1/PRDX3/MET/ADAM9/AXL/OSER1/SOD2/EGFR/NET1/JUN/ROMO1/TXNIP/ANXA1/AREG	25
BP	GO:0045736	negative regulation of cyclin-dependent protein serine/threonine kinase activity	7/1406	33/18903	0.00954834	0.0484321	0.0350717	IPO5/PLK1/IPO7/CDKN1B/CDKN2A/CDKN2B/TNFAIP3	7
BP	GO:0045943	positive regulation of transcription by RNA polymerase I	7/1406	33/18903	0.00954834	0.0484321	0.0350717	BAZ1B/DEK/DDX21/SMARCA5/SF3B1/NCL/SMARCB1	7
BP	GO:0051204	protein insertion into mitochondrial membrane	7/1406	33/18903	0.00954834	0.0484321	0.0350717	NMT1/HSP90AA1/HSPA4/TOMM20/TOMM22/PDCD5/ROMO1	7
BP	GO:1904030	negative regulation of cyclin-dependent protein kinase activity	7/1406	33/18903	0.00954834	0.0484321	0.0350717	IPO5/PLK1/IPO7/CDKN1B/CDKN2A/CDKN2B/TNFAIP3	7
BP	GO:1905476	negative regulation of protein localization to membrane	7/1406	33/18903	0.00954834	0.0484321	0.0350717	CLTC/PICALM/GBP1/GDI1/AP2M1/BCL2L1/TGFB1	7
BP	GO:0001914	regulation of T cell mediated cytotoxicity	8/1406	41/18903	0.00964093	0.0488157	0.0353495	TAP2/B2M/HLA-E/HLA-B/HLA-A/HLA-F/HLA-DRA/HLA-DRB1	8
BP	GO:0007339	binding of sperm to zona pellucida	8/1406	41/18903	0.00964093	0.0488157	0.0353495	UBAP2L/CCT5/CCT3/TCP1/CCT8/CCT4/B4GALT1/CCT7	8
BP	GO:0001101	response to acid chemical	18/1406	133/18903	0.00969705	0.0489276	0.0354305	DNMT1/IPO5/PCNA/CDKN1B/HNRNPD/RRAGA/RHOA/HNRNPAB/CAPN2/MYD88/PLEC/SLC7A5/TMBIM6/LAMTOR4/CYBB/EGFR/BCL2L1/COL5A2	18
BP	GO:0002244	hematopoietic progenitor cell differentiation	18/1406	133/18903	0.00969705	0.0489276	0.0354305	ADAR/PRKDC/NUDT21/ANLN/YTHDF2/TOP2A/ABL1/PRRC2C/XRCC5/NFE2L2/HSPA9/SBDS/TP53/SOX4/BATF/CSF1R/EEF2/TGFB1	18
BP	GO:0002702	positive regulation of production of molecular mediator of immune response	18/1406	133/18903	0.00969705	0.0489276	0.0354305	MSH2/DDX21/DDX1/MAPKAPK2/HMCES/B2M/MYD88/HLA-E/TFRC/SLC7A5/HLA-A/HLA-F/HK1/PHB2/CD74/GPI/TGFB1/LAPTM5	18
BP	GO:0030168	platelet activation	18/1406	133/18903	0.00969705	0.0489276	0.0354305	GNA13/PLSCR1/RAP2B/TLN1/MYH9/ACTB/ACTG1/MYL12A/FZD6/AXL/CLIC1/HSPB1/FN1/PPIA/FLNA/THBD/FCER1G/CD9	18
BP	GO:0032943	mononuclear cell proliferation	35/1406	312/18903	0.00979353	0.049371	0.0357516	ABL1/HMGB1/PRKAR1A/CTNNB1/SLC7A1/IRF1/NCSTN/ZBTB7B/CTPS1/MYD88/NCK2/MSN/CD276/HLA-E/HSPD1/TP53/HPRT1/TFRC/HLA-A/PRNP/PLA2G2F/HLA-DPA1/CD74/FCGR3A/AHR/RAC2/BCL2L1/IGF2/HLA-DRB1/VSIG4/HLA-DPB1/ANXA1/EFNB1/IDO1/RPS6	35
BP	GO:0008625	extrinsic apoptotic signaling pathway via death domain receptors	13/1406	85/18903	0.00980381	0.0493796	0.0357578	DAXX/DDX3X/PMAIP1/HMGB2/PEA15/ICAM1/TNFAIP3/RAF1/BAG3/BCL2L1/MAL/THBS1/TNFRSF1A	13
BP	GO:0001961	positive regulation of cytokine-mediated signaling pathway	10/1406	58/18903	0.00983661	0.0495014	0.0358461	PARP9/PARP14/LSM14A/HIF1A/IRF7/AXL/CD74/MMP12/LAPTM5/CPNE1	10
BP	GO:1902107	positive regulation of leukocyte differentiation	23/1406	184/18903	0.00988544	0.0496603	0.0359611	PRKDC/ACTL6A/HAX1/ARID1A/KLF10/HMGB1/SMARCC1/XRCC6/ZBTB7B/RHOA/ACTB/ZFP36L1/SMARCB1/HLA-DRA/SOX4/AXL/CD74/MDK/MMP14/HLA-DRB1/TESC/TGFB1/ANXA1	23
BP	GO:1903708	positive regulation of hemopoiesis	23/1406	184/18903	0.00988544	0.0496603	0.0359611	PRKDC/ACTL6A/HAX1/ARID1A/KLF10/HMGB1/SMARCC1/XRCC6/ZBTB7B/RHOA/ACTB/ZFP36L1/SMARCB1/HLA-DRA/SOX4/AXL/CD74/MDK/MMP14/HLA-DRB1/TESC/TGFB1/ANXA1	23
BP	GO:0070613	regulation of protein processing	11/1406	67/18903	0.0100436	0.0503734	0.0364775	SNX12/MYH9/ENO1/PRNP/MAGEA3/CTSZ/CAST/MMP14/PLAU/ANXA2/THBS1	11
BP	GO:0070663	regulation of leukocyte proliferation	31/1406	269/18903	0.0100449	0.0503734	0.0364775	HMGB1/PRKAR1A/CTNNB1/SLC7A1/IRF1/ZBTB7B/MYD88/NCK2/CD276/HLA-E/TFRC/TNFAIP3/HLA-A/PRNP/PLA2G2F/HLA-DPA1/CD74/FCGR3A/AHR/RAC2/CSF1R/BST2/BCL2L1/IGF2/CNN2/HLA-DRB1/VSIG4/HLA-DPB1/ANXA1/EFNB1/IDO1	31
BP	GO:0034764	positive regulation of transmembrane transport	28/1406	237/18903	0.0101479	0.0508456	0.0368194	WNK1/ABL1/PTPN11/ITGB1/ARPP19/CALM3/CALM2/SLC38A1/SUMO1/CTSS/NFE2L2/ACTN4/AZIN1/SLC7A5/BAK1/ARL6IP1/IFNGR2/CXCL9/ATP1B1/ATP1B3/CALM1/CXCL10/KCNN4/FLNA/CAV1/CXCL11/TESC/SLC9A3R1	28
BP	GO:0060562	epithelial tube morphogenesis	37/1406	335/18903	0.010254	0.0513323	0.0371719	TIMELESS/BRD2/ABL1/GNA13/RALA/DVL3/CTNNB1/RHOA/VANGL2/TMED2/EFNB2/HIF1A/CLIC4/TEAD2/FZD6/PTK7/MET/SOX4/CXCL10/CTSZ/DAG1/PHB2/DDR1/SOX9/MAGED1/MDK/PPP1CA/MMP14/CSF1R/MYC/CTSH/PLXNB2/TBX2/PFN1/TGFB1/ST14/AREG	37
BP	GO:0006469	negative regulation of protein kinase activity	26/1406	216/18903	0.0102704	0.0513699	0.0371991	ADAR/PAK2/NUP62/IPO5/SNX6/PLK1/IPO7/YWHAG/DNAJA1/PTPN1/ABL1/PRKAR1A/CDKN1B/CORO1C/TAF7/CDKN2A/CDKN2B/PLEC/TNFAIP3/NPM1/HSPB1/PPIA/CAV1/GADD45A/ERRFI1/UCHL1	26
BP	GO:0031109	microtubule polymerization or depolymerization	17/1406	124/18903	0.0103717	0.0517902	0.0375034	CKAP5/DCTN1/CKAP2/TPX2/KIF2C/ABL1/MAPRE1/RANBP9/CDKN1B/TUBG1/GIT1/STMN1/DRG1/FKBP4/MET/RAC1/CIB1	17
BP	GO:0050729	positive regulation of inflammatory response	20/1406	154/18903	0.0103724	0.0517902	0.0375034	DHX9/CD47/APP/OSMR/HLA-E/TNIP1/ITGA2/MGST2/AIM2/CTSC/IFI35/CCR7/MDK/ABCC1/NKG7/RPS19/NFKBIA/GRN/TNFRSF1A/IDO1	20
BP	GO:1900407	regulation of cellular response to oxidative stress	14/1406	95/18903	0.010384	0.0518031	0.0375128	UBQLN1/ABL1/SFPQ/PARP1/NONO/CTNNB1/MCL1/NFE2L2/HIF1A/MET/SOD2/HSPB1/PPIA/P4HB	14
BP	GO:0043467	regulation of generation of precursor metabolites and energy	18/1406	134/18903	0.0104469	0.0520714	0.037707	STAT3/VCP/CDK1/CCNB1/APP/RHOA/HIF1A/GIT1/GHITM/TP53/PGAM1/CHCHD2/SHMT2/PHB2/PPP1CA/IGF2/FBP1/EIF6	18
BP	GO:0007064	mitotic sister chromatid cohesion	6/1406	26/18903	0.0105926	0.0525287	0.0380383	SMC1A/CHTF8/SMC3/NAA50/CDCA5/CDC20	6
BP	GO:0060669	embryonic placenta morphogenesis	6/1406	26/18903	0.0105926	0.0525287	0.0380383	GRB2/TMED2/TRIM28/ZFP36L1/IGF2/ST14	6
BP	GO:1903798	regulation of miRNA maturation	6/1406	26/18903	0.0105926	0.0525287	0.0380383	STAT3/DDX5/TP53/ZMPSTE24/EGFR/TGFB1	6
BP	GO:0035036	sperm-egg recognition	9/1406	50/18903	0.0106026	0.0525287	0.0380383	UBAP2L/CCT5/CCT3/TCP1/CCT8/CCT4/B4GALT1/CCT7/CD9	9
BP	GO:0061082	myeloid leukocyte cytokine production	9/1406	50/18903	0.0106026	0.0525287	0.0380383	DDX21/DDX1/MAPKAPK2/MYD88/LITAF/AXL/CD74/TGFB1/LAPTM5	9
BP	GO:0072599	establishment of protein localization to endoplasmic reticulum	9/1406	50/18903	0.0106026	0.0525287	0.0380383	SRP72/HSPA5/SEC61A1/SSR3/UBL4A/BAG6/RAB10/SRP9/TRAM1	9
BP	GO:1902100	negative regulation of metaphase/anaphase transition of cell cycle	9/1406	50/18903	0.0106026	0.0525287	0.0380383	RAD21/PLK1/CDCA8/TPR/ZWINT/CCNB1/BIRC5/CDC20/AURKB	9
BP	GO:0030111	regulation of Wnt signaling pathway	37/1406	336/18903	0.0107241	0.053085	0.0384411	WNK1/SPIN1/DDX3X/ABL1/CSNK2A1/VCP/PPP2CA/CTNND1/CTNNB1/RNF213/APP/HDAC1/ATP6AP2/TBL1XR1/CTDNEP1/CDH3/FZD6/FERMT1/TNFAIP3/PTK7/PPP2R1A/SOX4/ITGA3/SOX9/SNX3/EGFR/MDK/PPP1CA/SOX2/CAV1/PFDN5/SNAI2/IGFBP4/EGR1/TGFB1/SLC9A3R1/JUP	37
BP	GO:0002544	chronic inflammatory response	5/1406	19/18903	0.010895	0.0537003	0.0388867	TNFAIP3/AHCY/THBS1/CXCL13/IDO1	5
BP	GO:0010801	negative regulation of peptidyl-threonine phosphorylation	5/1406	19/18903	0.010895	0.0537003	0.0388867	EIF4G1/CALM3/CALM2/CALM1/CADM4	5
BP	GO:0036003	positive regulation of transcription from RNA polymerase II promoter in response to stress	5/1406	19/18903	0.010895	0.0537003	0.0388867	HSPA5/ATF6B/NFE2L2/HIF1A/TP53	5
BP	GO:0042772	DNA damage response, signal transduction resulting in transcription	5/1406	19/18903	0.010895	0.0537003	0.0388867	FOXM1/COPS3/TP53/ZNF385A/RPL26	5
BP	GO:0045947	negative regulation of translational initiation	5/1406	19/18903	0.010895	0.0537003	0.0388867	LARP1/TPR/EIF2AK1/EIF4EBP2/RPL13A	5
BP	GO:0051494	negative regulation of cytoskeleton organization	21/1406	165/18903	0.0109473	0.0539116	0.0390396	PAK2/MTPN/CKAP2/TPX2/CAPZA1/SPTAN1/MAPRE1/WASF2/FLII/SPTBN1/TWF1/STMN1/PFN2/LIMA1/FKBP4/MET/NPM1/SSH3/CAPZB/PFN1/CIB1	21
BP	GO:0009161	ribonucleoside monophosphate metabolic process	10/1406	59/18903	0.0110762	0.0544559	0.0394338	PRPS1/CMPK1/PRPS2/PAICS/AK3/HPRT1/NT5E/IMPDH1/CDA/APRT	10
BP	GO:0090559	regulation of membrane permeability	12/1406	77/18903	0.0110767	0.0544559	0.0394338	NMT1/CNP/SLC25A5/PMAIP1/LAPTM4B/TMEM14A/TP53/BAK1/ALKBH7/CHCHD10/BCL2L1/LAPTM5	12
BP	GO:0019320	hexose catabolic process	8/1406	42/18903	0.0111524	0.0547341	0.0396352	PGK1/ENO1/TPI1/TP53/PFKP/HK1/ENO2/PKM	8
BP	GO:0050691	regulation of defense response to virus by host	8/1406	42/18903	0.0111524	0.0547341	0.0396352	DHX9/DTX3L/PARP9/STAT1/HSP90AA1/TNFAIP3/AIM2/MMP12	8
BP	GO:0018393	internal peptidyl-lysine acetylation	23/1406	186/18903	0.0111857	0.0548044	0.0396862	HCFC1/BAZ1B/DEK/CTCF/ACTL6A/POLE3/NAA50/PYGO2/DDX21/SET/SF3B3/WDR5/SMARCA5/SF3B1/BAG6/MORF4L1/USP22/TAF7/MORF4L2/ACTB/SMARCB1/ZMPSTE24/SNAI2	23
BP	GO:0034767	positive regulation of ion transmembrane transport	23/1406	186/18903	0.0111857	0.0548044	0.0396862	WNK1/ABL1/ITGB1/CALM3/CALM2/SLC38A1/SUMO1/CTSS/ACTN4/BAK1/ARL6IP1/IFNGR2/CXCL9/ATP1B1/ATP1B3/CALM1/CXCL10/KCNN4/FLNA/CAV1/CXCL11/TESC/SLC9A3R1	23
BP	GO:0002285	lymphocyte activation involved in immune response	25/1406	207/18903	0.0112212	0.0549312	0.039778	STAT3/MSH2/ABL1/HMGB1/UNG/ZBTB7B/HMCES/LAMP1/LCP1/HSPD1/TP53/TFRC/ICAM1/HLA-F/HLA-DRA/BATF/CD74/FCGR3A/MDK/NKG7/HLA-DRB1/TGFB1/ANXA1/FCER1G/RPS6	25
BP	GO:0035066	positive regulation of histone acetylation	7/1406	34/18903	0.0112699	0.0550293	0.039849	BAZ1B/DEK/DDX21/SMARCA5/SF3B1/SMARCB1/SNAI2	7
BP	GO:0048199	vesicle targeting, to, from or within Golgi	7/1406	34/18903	0.0112699	0.0550293	0.039849	TMED10/TFG/TMED2/PEF1/SEC16A/TRAPPC6A/TMED9	7
BP	GO:1901797	negative regulation of signal transduction by p53 class mediator	7/1406	34/18903	0.0112699	0.0550293	0.039849	PSMD10/KDM1A/CD74/PTTG1IP/CD44/SNAI2/ZNF385A	7
BP	GO:0061097	regulation of protein tyrosine kinase activity	14/1406	96/18903	0.0113497	0.055372	0.0400972	PAK2/SNX6/PTPN1/RAP2B/APP/NCK2/SHC1/PRNP/EGFR/CSF1R/CAV1/ERRFI1/EFNA1/AREG	14
BP	GO:0018394	peptidyl-lysine acetylation	24/1406	197/18903	0.0115617	0.0563109	0.0407771	HCFC1/BAZ1B/DEK/CTCF/ACTL6A/POLE3/NAA50/PYGO2/DDX21/SET/SF3B3/WDR5/SMARCA5/SF3B1/BAG6/MORF4L1/USP22/TAF7/MORF4L2/ACTB/SMARCB1/SOX4/ZMPSTE24/SNAI2	24
BP	GO:0051650	establishment of vesicle localization	24/1406	197/18903	0.0115617	0.0563109	0.0407771	DCTN1/SNAPIN/DYNC1H1/PICALM/YKT6/RAB7A/TMED10/CTNNB1/TFG/MYO1B/RAB1A/SDCBP/MYO1D/KIF5B/TMED2/KIF1C/ACTN4/PEF1/CDH3/MYO1C/SEC16A/TRAPPC6A/TMED9/CHMP2A	24
BP	GO:0071902	positive regulation of protein serine/threonine kinase activity	27/1406	229/18903	0.0117255	0.0570476	0.0413105	IQGAP1/DDX3X/PTPN1/PSMD10/CKS1B/IRAK1/CAB39/PPP2CA/DVL3/RALB/CDKN1B/CCNB1/CALM3/CALM2/RHOA/HSP90AB1/DAZAP2/ADAM9/CALM1/EGFR/MAGED1/CKS2/CSF1R/IGF2/THBS1/TGFB1/CIB1	27
BP	GO:0001841	neural tube formation	15/1406	106/18903	0.0117328	0.0570476	0.0413105	BRD2/ABL1/RALA/DVL3/VANGL2/TMED2/HIF1A/TEAD2/FZD6/PTK7/SOX4/PLXNB2/PFN1/TGFB1/ST14	15
BP	GO:0046651	lymphocyte proliferation	34/1406	305/18903	0.0117908	0.0572807	0.0414794	ABL1/HMGB1/PRKAR1A/CTNNB1/SLC7A1/IRF1/NCSTN/ZBTB7B/CTPS1/MYD88/NCK2/MSN/CD276/HLA-E/HSPD1/TP53/HPRT1/TFRC/HLA-A/PRNP/PLA2G2F/HLA-DPA1/CD74/FCGR3A/AHR/RAC2/IGF2/HLA-DRB1/VSIG4/HLA-DPB1/ANXA1/EFNB1/IDO1/RPS6	34
BP	GO:0010507	negative regulation of autophagy	13/1406	87/18903	0.0118433	0.0574875	0.0416291	EIF4G1/STAT3/UBQLN4/EIF4G2/MCL1/RRAGA/TP53/SLC7A5/MET/MAGEA3/POLDIP2/TSPO/RNF5	13
BP	GO:0001824	blastocyst development	16/1406	116/18903	0.011966	0.058034	0.0420249	CNOT1/ACTL6A/MFN2/INTS1/NASP/ASF1B/CAPN2/RRM2/TBL1XR1/SBDS/RPL13/SMARCB1/RTN4/PSMC4/FURIN/DAD1	16
BP	GO:0016570	histone modification	49/1406	474/18903	0.0120258	0.0581854	0.0421345	HCFC1/BAZ1B/DTX3L/DEK/HUWE1/DNMT1/SNW1/CTCF/CHD4/PRMT5/ACTL6A/POLE3/KDM5C/NAA50/PYGO2/DDB1/DDX21/SET/SFPQ/SF3B3/RBBP7/WDR82/JARID2/WDR5/SMARCA5/RBBP4/CTNNB1/SF3B1/HDAC1/MORF4L1/ZBTB7B/USP22/TAF7/MORF4L2/MTA2/AURKB/USP7/TBL1XR1/ACTB/TP53/KDM1A/PAF1/SMARCB1/NELFE/ZMPSTE24/COPRS/SNAI2/IGF2/LMNA	49
BP	GO:0030850	prostate gland development	9/1406	51/18903	0.0120478	0.0581854	0.0421345	CDKN1B/CTNNB1/TP63/FKBP4/TNC/SOX9/PSAP/SERPINB5/ANXA1	9
BP	GO:0043277	apoptotic cell clearance	9/1406	51/18903	0.0120478	0.0581854	0.0421345	RAB14/HMGB1/ITGAV/RAC1/AXL/RAC2/RHOG/THBS1/ANXA1	9
BP	GO:0044088	regulation of vacuole organization	9/1406	51/18903	0.0120478	0.0581854	0.0421345	UBQLN2/RALB/PIP4K2C/LAPTM4B/SCARB2/RAB1B/RNF5/ANXA2/GRN	9
BP	GO:1901985	positive regulation of protein acetylation	9/1406	51/18903	0.0120478	0.0581854	0.0421345	BAZ1B/DEK/DDX21/DDX3X/SMARCA5/SF3B1/SMARCB1/SOX4/SNAI2	9
BP	GO:0043244	regulation of protein-containing complex disassembly	17/1406	126/18903	0.0120757	0.0582714	0.0421968	UBQLN4/MTPN/CKAP2/TPX2/ETF1/CAPZA1/SPTAN1/FLII/SPTBN1/GSPT1/TWF1/LIMA1/ZMPSTE24/WDR1/EIF5A/CAPZB/CIB1	17
BP	GO:0031668	cellular response to extracellular stimulus	30/1406	262/18903	0.0121777	0.0587141	0.0425174	SNW1/EIF4G1/HNRNPL/ADNP/LAMP2/HSPA8/KLF10/HSPA5/PMAIP1/RALB/IFI16/SREBF2/RRAGA/PPP1R9B/NFE2L2/PLIN3/CDKN2B/PLEC/TP53/SLC7A5/WDR45B/DCTPP1/RNF167/AXL/COMT/HNRNPA1/GLUL/SNAI2/SLC38A2/PLIN2	30
BP	GO:0002011	morphogenesis of an epithelial sheet	10/1406	60/18903	0.0124305	0.0598827	0.0433636	ITGB1/RHOA/FERMT1/JAG1/DAG1/DDR1/CD44/FLNA/RHOC/MMP12	10
BP	GO:0006475	internal protein amino acid acetylation	23/1406	188/18903	0.0126202	0.060308	0.0436715	HCFC1/BAZ1B/DEK/CTCF/ACTL6A/POLE3/NAA50/PYGO2/DDX21/SET/SF3B3/WDR5/SMARCA5/SF3B1/BAG6/MORF4L1/USP22/TAF7/MORF4L2/ACTB/SMARCB1/ZMPSTE24/SNAI2	23
BP	GO:0007183	SMAD protein complex assembly	4/1406	13/18903	0.0126445	0.060308	0.0436715	PARP1/PMEPA1/FKBP1A/TGFB1	4
BP	GO:0010771	negative regulation of cell morphogenesis involved in differentiation	4/1406	13/18903	0.0126445	0.060308	0.0436715	RCC2/GBP1/CORO1C/ACTN4	4
BP	GO:0042921	glucocorticoid receptor signaling pathway	4/1406	13/18903	0.0126445	0.060308	0.0436715	ARID1A/PTGES3/YWHAH/CALR	4
BP	GO:0043471	regulation of cellular carbohydrate catabolic process	4/1406	13/18903	0.0126445	0.060308	0.0436715	SCARB2/TP53/PGAM1/PPP1CA	4
BP	GO:0048012	hepatocyte growth factor receptor signaling pathway	4/1406	13/18903	0.0126445	0.060308	0.0436715	PTPN1/STMN1/MET/RAC1	4
BP	GO:0098935	dendritic transport	4/1406	13/18903	0.0126445	0.060308	0.0436715	HNRNPU/STAU1/SFPQ/KIF5B	4
BP	GO:1900025	negative regulation of substrate adhesion-dependent cell spreading	4/1406	13/18903	0.0126445	0.060308	0.0436715	RCC2/GBP1/CORO1C/ACTN4	4
BP	GO:1900121	negative regulation of receptor binding	4/1406	13/18903	0.0126445	0.060308	0.0436715	ATP2A2/ADAM15/PTPRF/B2M	4
BP	GO:1900262	regulation of DNA-directed DNA polymerase activity	4/1406	13/18903	0.0126445	0.060308	0.0436715	CHTF8/PCNA/RFC2/RFC4	4
BP	GO:1900264	positive regulation of DNA-directed DNA polymerase activity	4/1406	13/18903	0.0126445	0.060308	0.0436715	CHTF8/PCNA/RFC2/RFC4	4
BP	GO:2001046	positive regulation of integrin-mediated signaling pathway	4/1406	13/18903	0.0126445	0.060308	0.0436715	LAMC1/LAMB1/CD63/FLNA	4
BP	GO:0062207	regulation of pattern recognition receptor signaling pathway	15/1406	107/18903	0.0127367	0.0604077	0.0437437	UBQLN1/DDX3X/ZDHHC5/PUM2/HMGB1/DDX60/IRF1/RIOK3/TNFAIP3/IRF7/RTN4/IFI35/C1QBP/CAV1/FLOT1	15
BP	GO:0018126	protein hydroxylation	6/1406	27/18903	0.012781	0.0604077	0.0437437	PLOD2/PRDX4/PLOD1/P4HA1/P4HB/FKBP10	6
BP	GO:0031954	positive regulation of protein autophosphorylation	6/1406	27/18903	0.012781	0.0604077	0.0437437	DDX3X/CALM3/RAP2B/CALM2/CALM1/TNKS1BP1	6
BP	GO:0039529	RIG-I signaling pathway	6/1406	27/18903	0.012781	0.0604077	0.0437437	OAS3/LSM14A/PUM2/DDX60/PHB2/C1QBP	6
BP	GO:0042278	purine nucleoside metabolic process	6/1406	27/18903	0.012781	0.0604077	0.0437437	ICMT/PGM2/HPRT1/AHCY/NT5E/APRT	6
BP	GO:0048207	vesicle targeting, rough ER to cis-Golgi	6/1406	27/18903	0.012781	0.0604077	0.0437437	TMED10/TFG/TMED2/PEF1/SEC16A/TRAPPC6A	6
BP	GO:0048208	COPII vesicle coating	6/1406	27/18903	0.012781	0.0604077	0.0437437	TMED10/TFG/TMED2/PEF1/SEC16A/TRAPPC6A	6
BP	GO:0051291	protein heterooligomerization	6/1406	27/18903	0.012781	0.0604077	0.0437437	CPSF7/RRM1/NUDT21/MAT2A/FARSA/RRM2	6
BP	GO:0051571	positive regulation of histone H3-K4 methylation	6/1406	27/18903	0.012781	0.0604077	0.0437437	HCFC1/DNMT1/SNW1/WDR5/CTNNB1/NELFE	6
BP	GO:1903055	positive regulation of extracellular matrix organization	6/1406	27/18903	0.012781	0.0604077	0.0437437	ABL1/COLGALT1/DAG1/SOX9/FSCN1/TGFB1	6
BP	GO:1904376	negative regulation of protein localization to cell periphery	6/1406	27/18903	0.012781	0.0604077	0.0437437	CLTC/PICALM/GBP1/AP2M1/BCL2L1/TGFB1	6
BP	GO:0090114	COPII-coated vesicle budding	8/1406	43/18903	0.0128316	0.0605476	0.043845	SEC23B/TMED10/TFG/RAB1A/TMED2/PEF1/SEC16A/TRAPPC6A	8
BP	GO:1902275	regulation of chromatin organization	8/1406	43/18903	0.0128316	0.0605476	0.043845	HNRNPU/DNMT1/MKI67/SSRP1/TPR/CDK2/TRIM28/KDM1A	8
BP	GO:0008584	male gonad development	19/1406	147/18903	0.0128639	0.0606005	0.0438834	SF1/MSH2/CSDE1/NASP/CTNNA1/NCOA4/ADAM15/HMGB2/ATN1/EIF2S2/TNFSF10/YBX3/SOX9/PRDX4/CRKL/MMP14/BCL2L1/MEA1/TESC	19
BP	GO:0017015	regulation of transforming growth factor beta receptor signaling pathway	19/1406	147/18903	0.0128639	0.0606005	0.0438834	SNW1/SNX6/STRAP/RBBP7/HSPA5/RBBP4/HDAC1/SDCBP/CDKN2B/HSP90AB1/TP53/FERMT1/CAV2/ITGA3/CAV1/PMEPA1/FKBP1A/THBS1/TGFB1	19
BP	GO:0061041	regulation of wound healing	18/1406	137/18903	0.0129763	0.0610801	0.0442306	ITGB1/NFE2L2/ACTG1/FERMT1/TNFAIP3/CADM4/ST3GAL4/SERPING1/F3/CLDN1/PLAU/CAV1/ANXA2/SRSF6/THBS1/ANXA1/THBD/CD9	18
BP	GO:0001838	embryonic epithelial tube formation	17/1406	127/18903	0.0130066	0.0611725	0.0442976	BRD2/ABL1/RALA/DVL3/CTNNB1/VANGL2/TMED2/HIF1A/TEAD2/FZD6/PTK7/SOX4/SOX9/PLXNB2/PFN1/TGFB1/ST14	17
BP	GO:2000406	positive regulation of T cell migration	7/1406	35/18903	0.0132054	0.0620566	0.0449378	WNK1/ABL1/APP/RHOA/CXCL10/CXCL13/CCL20	7
BP	GO:0045619	regulation of lymphocyte differentiation	25/1406	210/18903	0.0132986	0.0624437	0.0452181	PRKDC/ACTL6A/ARID1A/ABL1/HMGB1/SMARCC1/XRCC6/IRF1/ZBTB7B/RHOA/CLPTM1/ACTB/ZFP36L1/SMARCB1/HLA-DRA/SOX4/AXL/BATF/CD74/HMGB3/MDK/ZFP36L2/MMP14/HLA-DRB1/ANXA1	25
BP	GO:0051896	regulation of protein kinase B signaling	23/1406	189/18903	0.0133907	0.062825	0.0454942	HAX1/MTDH/MAZ/ITGB1/PPP2CA/HSP90AA1/HSP90AB1/MET/AXL/DAG1/RTN4/EGFR/CCR7/F3/C1QBP/IGF2/THBS1/AKR1C2/TGFB1/PHLDA3/CPNE1/SLC9A3R1/CIB1	23
BP	GO:0002437	inflammatory response to antigenic stimulus	12/1406	79/18903	0.0134749	0.0630658	0.0456686	YES1/HMGB1/HMGB2/PNMA1/HLA-E/AHCY/PSMB4/CCR7/FCGR3A/PLK2/FURIN/HLA-DRB1	12
BP	GO:0002720	positive regulation of cytokine production involved in immune response	12/1406	79/18903	0.0134749	0.0630658	0.0456686	DDX21/DDX1/MAPKAPK2/B2M/MYD88/HLA-E/SLC7A5/HLA-A/HLA-F/HK1/CD74/LAPTM5	12
BP	GO:0086001	cardiac muscle cell action potential	12/1406	79/18903	0.0134749	0.0630658	0.0456686	ATP2A2/DSG2/ATP1A1/CALM3/YWHAE/DSP/ATP1B1/CALM1/FLNA/CAV1/GJA1/JUP	12
BP	GO:0014020	primary neural tube formation	14/1406	98/18903	0.0134899	0.0630846	0.0456822	BRD2/ABL1/RALA/DVL3/VANGL2/TMED2/HIF1A/TEAD2/FZD6/PTK7/PLXNB2/PFN1/TGFB1/ST14	14
BP	GO:0043392	negative regulation of DNA binding	9/1406	52/18903	0.0136349	0.0634414	0.0459406	SUMO3/IFI16/SUMO1/E2F1/KDM1A/JUN/NFKBIA/CPNE1/ID1	9
BP	GO:0042692	muscle cell differentiation	43/1406	409/18903	0.013635	0.0634414	0.0459406	HNRNPU/DNMT1/PTBP1/MTPN/ATP2A2/ITGB1/PRKAR1A/CDK1/FLII/CTNNB1/LAMC1/PTGFRN/MORF4L2/CAPN2/EFNB2/MYH9/CALR/ACTN4/PLEC/ACTG1/KDM1A/ACTN1/CAV2/CXCL9/CXCL10/ZMPSTE24/WDR1/SOD2/SOX9/PLD3/LAMB1/EHD2/MMP14/MYOF/CD53/TBX2/IGF2/FLOT1/TGFB1/UCHL1/LMNA/CD9/KRT19	43
BP	GO:0009168	purine ribonucleoside monophosphate biosynthetic process	5/1406	20/18903	0.0136545	0.0634414	0.0459406	PRPS2/PAICS/HPRT1/IMPDH1/APRT	5
BP	GO:0010288	response to lead ion	5/1406	20/18903	0.0136545	0.0634414	0.0459406	PLSCR1/PPP2CA/APP/PPP1CA/CLDN1	5
BP	GO:0045655	regulation of monocyte differentiation	5/1406	20/18903	0.0136545	0.0634414	0.0459406	IRF7/ZFP36L1/CD74/MYC/HLA-DRB1	5
BP	GO:0046931	pore complex assembly	5/1406	20/18903	0.0136545	0.0634414	0.0459406	NUP205/NUP153/CCT3/CCT8/RTN4	5
BP	GO:0071243	cellular response to arsenic-containing substance	5/1406	20/18903	0.0136545	0.0634414	0.0459406	DAXX/DDX3X/VCP/HNRNPA1/SLC38A2	5
BP	GO:1903579	negative regulation of ATP metabolic process	5/1406	20/18903	0.0136545	0.0634414	0.0459406	STAT3/PARP1/GIT1/TSPO/FBP1	5
BP	GO:0046546	development of primary male sexual characteristics	19/1406	148/18903	0.0137631	0.0638944	0.0462686	SF1/MSH2/CSDE1/NASP/CTNNA1/NCOA4/ADAM15/HMGB2/ATN1/EIF2S2/TNFSF10/YBX3/SOX9/PRDX4/CRKL/MMP14/BCL2L1/MEA1/TESC	19
BP	GO:0014812	muscle cell migration	15/1406	108/18903	0.0138062	0.0639912	0.0463387	GNA13/AKIRIN1/PLXNA1/GNA12/RHOA/NFE2L2/ITGA2/AAMP/APEX1/DDR1/NET1/MDK/PLAU/IGFBP3/ANXA1	15
BP	GO:0032231	regulation of actin filament bundle assembly	15/1406	108/18903	0.0138062	0.0639912	0.0463387	PAK2/ABL1/WASF2/CD47/RHOA/CDC42/STMN1/PFN2/ACTG1/MET/RAC1/FLNA/RHOC/PFN1/ID1	15
BP	GO:0034113	heterotypic cell-cell adhesion	10/1406	61/18903	0.0139057	0.0644007	0.0466352	WNK1/ITGB1/DSG2/CD47/ITGAV/DSP/PERP/CD44/FLOT1/JUP	10
BP	GO:0002718	regulation of cytokine production involved in immune response	16/1406	118/18903	0.0139637	0.0646172	0.046792	DDX21/DDX1/MAPKAPK2/B2M/MYD88/HLA-E/SLC7A5/LITAF/HLA-A/HLA-F/HK1/AXL/CD74/BST2/TGFB1/LAPTM5	16
BP	GO:0030218	erythrocyte differentiation	17/1406	128/18903	0.0139929	0.0647002	0.0468521	ADAR/PRKDC/STAT3/STAT1/PTBP3/SLC25A5/HMGB2/B2M/HIF1A/HSPA9/MAFB/ZFP36L1/DNASE2/TMEM14C/RPS14/RPS19/RPS6	17
BP	GO:0071229	cellular response to acid chemical	13/1406	89/18903	0.0141963	0.0655879	0.0474949	DNMT1/IPO5/HNRNPD/RRAGA/HNRNPAB/CAPN2/PLEC/SLC7A5/LAMTOR4/CYBB/EGFR/BCL2L1/COL5A2	13
BP	GO:0006575	cellular modified amino acid metabolic process	22/1406	180/18903	0.0146249	0.0674598	0.0488505	PLSCR1/MTHFD2/GLO1/ICMT/TYMS/SERINC1/PTDSS1/NFE2L2/ALDH9A1/PLOD2/MGST2/AHCY/MBOAT1/PLA2G2F/SERINC3/SHMT2/SOD2/GSS/SERINC2/ABHD12/CTSB/GPX4	22
BP	GO:0016573	histone acetylation	22/1406	180/18903	0.0146249	0.0674598	0.0488505	HCFC1/BAZ1B/DEK/CTCF/ACTL6A/POLE3/NAA50/PYGO2/DDX21/SET/SF3B3/WDR5/SMARCA5/SF3B1/MORF4L1/USP22/TAF7/MORF4L2/ACTB/SMARCB1/ZMPSTE24/SNAI2	22
BP	GO:0061351	neural precursor cell proliferation	19/1406	149/18903	0.014711	0.0678027	0.0490988	RACGAP1/MELK/ITGB1/CTNNA1/CTNNB1/RHOA/RAB10/HIF1A/TP53/KDM1A/FZD6/DBN1/GNAI2/MDK/ATF5/PLXNB2/TRNP1/NDUFS2/GNG5	19
BP	GO:0071230	cellular response to amino acid stimulus	12/1406	80/18903	0.0148133	0.0681647	0.0493609	DNMT1/IPO5/HNRNPD/RRAGA/HNRNPAB/CAPN2/SLC7A5/LAMTOR4/CYBB/EGFR/BCL2L1/COL5A2	12
BP	GO:1901184	regulation of ERBB signaling pathway	12/1406	80/18903	0.0148133	0.0681647	0.0493609	NUP62/SNX6/PTPN12/RALA/RALB/RAB7A/SHKBP1/IFI6/RTN4/EGFR/ERRFI1/AREG	12
CC	GO:0030055	cell-substrate junction	139/1426	432/19869	1.13922e-54	7.29776e-52	4.10355e-52	HNRNPK/ACTR2/ACTR3/YES1/PIP5K1A/YWHAG/IQGAP1/YWHAQ/HSPA8/GNA13/PTPRA/JAK1/ARF6/MAP4K4/HSPA5/MAPRE1/ITGB1/PTPN12/CLTC/HYOU1/RALA/FLII/LASP1/PPP1CB/CTNNA1/CTNNB1/TLN1/HSP90B1/GNA12/CORO1C/NCSTN/LAP3/PPP1CC/B2M/SDCBP/RHOA/GDI2/CAPN2/EFNB2/LCP1/MYH9/CALR/ITGAV/RAB10/ACTN4/YWHAE/PCBP2/HSPA9/ANXA5/TWF1/GIT1/MSN/SCARB2/CDC42/PLEC/FLNB/RPS15/RPL18/LIMA1/ACTB/RPLP1/ACTG1/YWHAB/ARF1/CNN3/ITGA6/ICAM1/ITGA2/…	139
CC	GO:0005925	focal adhesion	137/1426	422/19869	2.07913e-54	7.29776e-52	4.10355e-52	HNRNPK/ACTR2/ACTR3/YES1/PIP5K1A/YWHAG/IQGAP1/YWHAQ/HSPA8/GNA13/PTPRA/JAK1/ARF6/MAP4K4/HSPA5/MAPRE1/ITGB1/PTPN12/CLTC/HYOU1/RALA/FLII/LASP1/PPP1CB/CTNNA1/CTNNB1/TLN1/HSP90B1/GNA12/CORO1C/NCSTN/LAP3/PPP1CC/B2M/SDCBP/RHOA/GDI2/CAPN2/EFNB2/LCP1/MYH9/CALR/ITGAV/RAB10/ACTN4/YWHAE/PCBP2/HSPA9/ANXA5/TWF1/GIT1/MSN/SCARB2/CDC42/PLEC/FLNB/RPS15/RPL18/LIMA1/ACTB/RPLP1/ACTG1/YWHAB/ARF1/CNN3/ITGA6/ICAM1/ITGA2/…	137
CC	GO:0042470	melanosome	48/1426	110/19869	2.961e-26	5.19656e-24	2.92204e-24	GANAB/PDIA6/CANX/HSPA8/GNA13/DNAJC5/CNP/CALU/HSPA5/ITGB1/CLTC/RPN1/RAN/RAB5C/SND1/ATP1A1/RAB7A/PDIA4/TMED10/HSP90B1/RAB1A/NCSTN/TPP1/HSP90AA1/SDCBP/LAMP1/CCT4/YWHAE/HSP90AB1/YWHAB/TFRC/AHCY/PDIA3/RAC1/ATP1B3/RAB38/SYTL1/SYPL1/YWHAZ/STOM/CD63/MMP14/FASN/ANXA2/P4HB/FLOT1/SLC3A2/CTSB	48
CC	GO:0048770	pigment granule	48/1426	110/19869	2.961e-26	5.19656e-24	2.92204e-24	GANAB/PDIA6/CANX/HSPA8/GNA13/DNAJC5/CNP/CALU/HSPA5/ITGB1/CLTC/RPN1/RAN/RAB5C/SND1/ATP1A1/RAB7A/PDIA4/TMED10/HSP90B1/RAB1A/NCSTN/TPP1/HSP90AA1/SDCBP/LAMP1/CCT4/YWHAE/HSP90AB1/YWHAB/TFRC/AHCY/PDIA3/RAC1/ATP1B3/RAB38/SYTL1/SYPL1/YWHAZ/STOM/CD63/MMP14/FASN/ANXA2/P4HB/FLOT1/SLC3A2/CTSB	48
CC	GO:1904813	ficolin-1-rich granule lumen	50/1426	124/19869	2.26235e-25	3.07652e-23	1.72994e-23	HUWE1/KPNB1/ACTR2/PSMD2/ILF2/ACLY/HSPA8/DDX3X/CANT1/VCP/PSMC2/CAB39/HMGB1/ACTR1B/PGM1/XRCC6/PSMD7/HSP90AA1/PSMD11/CTSS/CCT8/PSMC3/PGM2/HSP90AB1/PSMD3/PGAM1/OSTF1/CTSZ/GNS/IMPDH1/GUSB/PRDX4/PSMB7/PDAP1/PPIA/CAPN1/CDA/CTSH/GPI/PKM/EEF2/PYGL/PSMB1/COTL1/CTSB/JUP/CFD/EEF1A1/CST3/FTH1	50
CC	GO:0022626	cytosolic ribosome	46/1426	105/19869	2.62951e-25	3.07652e-23	1.72994e-23	RPS28/RPL28/RPS15/RPL18/RPLP1/RPL14/RPL29/RPL13/RPL34/RPS2/RPL24/RPL9/RPS20/RPL36/RPL37A/RPS24/RPS9/RPL4/RPL38/RPL3/RPL18A/RPL27A/RPLP2/RPL12/RPL13A/RPS8/RPS25/FAU/RPS11/RPS14/RPS19/RPSA/RPL39/RPL23A/RPL8/RPL37/RPL11/RPS21/UBA52/RPL26/RPS18/RPL15/RPL27/RPL32/RPL35/RPS6	46
CC	GO:0101002	ficolin-1-rich granule	61/1426	185/19869	4.27763e-25	4.28986e-23	2.4122e-23	HUWE1/DIAPH1/KPNB1/ACTR2/COPB1/PSMD2/ILF2/LAMP2/ACLY/HSPA8/DDX3X/CANT1/VCP/PSMC2/CAB39/HMGB1/ACTR1B/PGM1/XRCC6/PSMD7/HSP90AA1/LAMP1/RHOA/ATP6AP2/PSMD11/CTSS/CCT8/PSMC3/PGM2/DSP/HSP90AB1/PSMD3/PGAM1/RAC1/OSTF1/DYNLL1/CTSZ/GNS/IMPDH1/GUSB/PRDX4/PSMB7/PDAP1/PPIA/CAPN1/CDA/CTSH/GPI/PKM/EEF2/PKP1/PYGL/PSMB1/COTL1/CTSB/JUP/CFD/EEF1A1/FCER1G/CST3/FTH1	61
CC	GO:0044391	ribosomal subunit	60/1426	188/19869	7.26584e-24	6.37577e-22	3.58512e-22	MRPL49/MRPL3/DAP3/MRPL9/MRPL37/MRPS10/MRPS16/RPS28/RPL28/RPS15/RPL18/MRPS18B/RPLP1/MRPS35/RPL14/RPL29/RPL13/RPL34/RPS2/RPL24/RPL9/RPS20/RPL36/RPL37A/RPS24/NPM1/RPS9/MRPL45/RPL4/RPL38/RPL3/RPL18A/RPL27A/MRPL15/RPLP2/RPL12/RPL13A/RPS8/RPS25/FAU/RPS11/RPS14/MRPL51/RPS19/RPSA/RPL39/RPL23A/MRPL41/RPL8/RPL37/RPL11/RPS21/UBA52/RPL26/RPS18/RPL15/RPL27/RPL32/RPL35/RPS6	60
CC	GO:0005840	ribosome	66/1426	232/19869	5.50477e-23	4.29372e-21	2.41437e-21	DHX9/SF1/LARP1/CANX/MRPL49/MRPL3/DAP3/MRPL9/MRPL37/MRPS10/MRPS16/RRBP1/RPS28/RPL28/RPS15/RPL18/MRPS18B/RPLP1/MRPS35/RPL14/RPL29/RPL13/APEX1/RPL34/RPS2/RPL24/RPL9/RPS20/RPL36/RPL37A/RPS24/NPM1/RPS9/MRPL45/RPL4/RPL38/RPL3/RPL18A/RPL27A/MRPL15/RPLP2/RPL12/RPL13A/RPS8/RPS25/FAU/RPS11/RPS14/MRPL51/RPS19/RPSA/RPL39/RPL23A/MRPL41/RPL8/RPL37/RPL11/RPS21/UBA52/RPL26/RPS18/RPL15/RPL27/RPL32/RPL35/RPS6	66
[truncated: 456 more rows]

## Sheet: C
KEGG analysis of 1525 RNA modification-related DEGs
ID	Description	GeneRatio	BgRatio	pvalue	p.adjust	qvalue	geneID	Count
[truncated: 88 more rows]

## Sheet: D
355 DEGs with significant prognostic value
id	HR	HR.95L	HR.95H	pvalue
XPO1	1.00684	1.00024	1.01349	0.0421579
THRAP3	1.00436	1.00009	1.00864	0.0452518
NUP205	1.01055	1.00286	1.0183	0.00707572
SUPT16H	1.00486	1.00112	1.0086	0.0107158
GANAB	1.00194	1.00088	1.003	0.000319321
[truncated: 350 more rows]

## Sheet: E
The coefficients of genes in the Writer-Score scoring system
[truncated: 11 more rows]

[truncated: 3 more sheets: F, G, H]
